# Supplementary material for: The association between non-suicidal self-injury and negative life events in children and adolescents in underdeveloped regions of south-western China
Source: PeerJ. 2022 Mar 9;10:e12665. doi: 10.7717/peerj.12665 (PMC8917796; doi:10.7717/peerj.12665)
Supplement: Supplemental Information 2 [file peerj-10-12665-s002.xlsx]

## Sheet: raw data
A1	A2	A3	age	A7	A8	A9	A10	A111	A1121	A1122	A1123	A1124	A1125	A1126	A1127	A1128	A121	A1221	A1222	A123	A1241	A1242	A1243	A1244	A1245	A1246	A1247	A1248	A1249	A12410	A12411	A12412	A12413	A12415	A1211	A125	A1261	A1262	A127	A1281	A1282	A1283	A1284	A1285	A1286	A1287	A1288	A1289	A12810
1	2	2007-10-29	12	2	2	1	0	4	1	2	1	2	2	2	2	1	1	2	#NULL!	5	2	2	2	2	2	2	2	2	2	2	2	2	2	1	#NULL!	1	1	40	5	2	2	2	2	2	2	2	2	2	2
2	1	2007-06-21	12	2	2	2	0	3	1	1	2	1	2	2	2	2	1	1	38	3	2	2	2	2	2	2	2	2	2	2	2	2	2	1	#NULL!	1	1	38	3	2	2	2	2	2	2	2	2	2	2
1	5	2006-11-03	13	2	2	2	0	4	1	1	1	1	2	2	2	2	1	1	45	0	2	2	2	2	2	2	2	2	2	2	2	2	2	1	#NULL!	1	1	40	0	2	2	2	2	2	2	2	2	2	2
2	1	2006-10-15	13	2	2	2	0	5	1	1	1	1	1	1	2	2	1	1	39	5	2	2	2	2	2	2	2	2	2	2	2	2	2	1	#NULL!	1	1	37	4	2	2	2	2	2	2	2	2	2	2
2	4	2006-12-15	12	2	2	2	1	4	1	1	1	1	2	2	2	2	1	2	#NULL!	2	2	2	2	2	2	2	2	2	2	2	2	2	2	1	#NULL!	1	2	#NULL!	3	2	2	2	2	2	2	2	2	2	2
2	3	2003-07-28	16	3	2	2	1	1	1	2	2	2	2	2	2	2	1	1	54	3	2	2	2	2	2	2	2	2	2	2	2	2	2	1	#NULL!	1	1	43	2	2	2	2	2	2	2	2	2	2	1
1	3	2006-02-18	13	2	2	1	0	2	1	1	2	2	2	2	2	2	1	1	44	4	2	2	2	2	2	2	2	2	2	2	2	2	2	1	#NULL!	1	1	43	4	2	2	2	2	2	2	2	2	2	2
2	1	2006-05-17	13	2	2	2	1	5	1	1	1	1	2	2	2	2	1	1	42	2	2	2	2	2	2	2	2	2	2	2	2	2	2	1	#NULL!	1	1	39	2	2	2	2	2	2	2	2	2	2	2
1	3	2003-02-22	16	3	2	2	0	5	1	1	1	1	2	2	2	2	1	1	42	3	2	2	2	2	2	2	2	2	2	2	2	2	2	1	#NULL!	1	1	40	2	2	2	2	2	2	2	2	2	2	2
1	1	2002-06-05	17	3	2	1	0	3	1	1	1	2	2	2	2	2	1	1	48	4	2	2	2	2	2	2	2	2	2	2	2	2	2	1	#NULL!	1	1	47	2	2	2	2	2	2	2	2	2	2	2
2	5	2007-08-15	12	2	2	2	0	8	1	1	1	1	1	2	1	2	1	1	45	0	2	2	2	2	2	2	2	2	2	2	2	2	2	1	#NULL!	1	1	31	3	2	2	2	2	2	2	2	2	2	2
2	6	2007-08-04	12	2	2	1	0	2	1	1	2	2	2	2	2	2	1	1	41	4	2	2	2	2	2	2	2	2	2	2	2	2	2	1	#NULL!	1	1	39	4	2	2	2	2	2	2	2	2	2	2
1	1	2007-06-26	12	2	2	2	0	3	1	1	1	2	2	2	2	2	1	2	#NULL!	0	2	2	2	2	2	2	2	2	2	2	2	2	2	1	#NULL!	1	2	#NULL!	0	2	2	2	2	2	2	2	2	2	2
2	6	2007-05-03	12	2	1	1	0	4	1	1	1	2	2	2	2	2	1	1	51	4	2	2	2	2	2	2	2	2	2	1	2	2	2	2	#NULL!	1	1	50	4	2	2	2	2	2	2	2	2	2	2
2	1	2006-02-28	13	2	2	2	0	5	1	1	1	1	2	2	2	2	1	1	43	3	2	2	2	2	2	2	2	2	2	2	2	2	2	1	#NULL!	1	1	40	3	2	2	2	2	2	2	2	2	2	2
2	5	2006-06-14	13	2	2	1	0	2	1	2	1	2	2	2	2	2	1	1	50	4	2	2	2	2	2	2	2	2	2	2	2	2	2	1	#NULL!	1	1	45	4	2	2	2	2	2	2	2	2	2	2
2	5	2007-01-24	12	2	2	2	0	7	2	2	1	2	2	2	1	2	1	1	36	5	2	2	2	2	2	2	2	2	2	2	2	2	2	1	#NULL!	1	1	34	5	2	2	2	2	2	2	2	2	2	2
1	4	2005-07-23	14	2	1	1	0	2	1	1	2	2	2	2	2	2	1	1	49	5	2	2	2	2	2	2	2	2	2	2	2	2	2	1	#NULL!	1	1	45	4	2	2	2	2	2	2	2	2	2	2
1	1	2005-07-12	14	2	2	1	0	5	1	1	1	2	2	2	2	1	1	2	#NULL!	5	2	2	2	2	2	2	2	2	2	2	2	2	2	1	#NULL!	1	1	42	5	2	2	2	2	2	2	2	2	2	2
2	6	2005-11-26	14	2	2	1	1	1	1	2	2	2	2	2	2	2	1	2	#NULL!	5	2	2	2	2	2	2	2	2	2	2	2	2	2	1	#NULL!	1	2	#NULL!	5	2	2	2	2	2	2	2	1	2	2
1	5	2006-05-15	13	2	2	1	0	2	1	1	2	2	2	2	2	2	1	2	#NULL!	5	2	2	2	2	2	2	2	2	2	2	2	2	2	1	#NULL!	1	2	#NULL!	5	2	2	2	2	2	2	2	2	2	2
2	1	2007-07-02	12	2	2	2	2	3	1	1	2	1	2	2	2	2	1	1	43	1	2	2	2	2	2	2	2	1	2	2	2	2	2	2	#NULL!	1	1	36	4	2	2	2	2	2	2	2	2	2	2
2	1	2007-05-25	12	2	2	2	0	3	1	1	2	1	2	2	2	2	1	1	37	4	2	2	2	2	2	2	2	2	2	2	2	2	2	1	#NULL!	1	1	34	3	2	2	2	2	2	2	2	2	2	2
1	6	2007-03-18	12	2	2	1	0	3	1	1	1	2	2	2	2	2	1	2	#NULL!	5	2	2	2	2	2	2	2	2	2	2	2	2	2	1	#NULL!	1	2	#NULL!	5	2	2	2	2	2	2	2	2	2	2
2	1	2006-04-06	13	2	2	2	0	3	1	2	2	1	2	2	2	2	2	#NULL!	#NULL!	#NULL!	#NULL!	#NULL!	#NULL!	#NULL!	#NULL!	#NULL!	#NULL!	#NULL!	#NULL!	#NULL!	#NULL!	#NULL!	#NULL!	#NULL!	12	1	1	44	3	2	2	2	2	2	2	2	2	2	2
1	1	2006-09-18	13	2	1	2	0	7	1	1	1	1	2	2	2	2	1	1	49	4	2	2	2	2	2	2	2	2	2	2	2	2	2	1	#NULL!	1	1	49	3	2	2	2	2	2	2	2	2	2	2
2	1	2003-01-02	16	3	2	2	0	5	1	1	1	1	2	2	2	2	1	2	#NULL!	2	2	2	2	2	2	2	2	2	2	2	2	2	2	1	#NULL!	1	2	#NULL!	3	2	2	2	2	2	2	2	2	2	2
1	1	2004-10-01	15	3	2	2	0	3	1	1	2	1	2	2	2	2	1	1	42	4	2	2	2	2	2	2	2	2	2	2	2	2	2	1	#NULL!	1	1	40	5	2	2	2	2	2	2	2	2	2	2
2	6	2003-04-26	16	3	1	1	0	3	1	2	1	2	1	2	2	2	1	1	46	0	2	2	2	2	2	2	2	2	2	2	2	2	2	1	#NULL!	1	1	44	5	2	2	2	2	2	2	2	2	2	2
1	1	2007-07-05	12	2	2	2	0	4	2	2	2	2	2	2	1	2	1	1	43	3	2	1	2	2	2	2	2	2	2	2	2	2	2	2	#NULL!	1	1	40	2	2	2	2	2	2	2	2	2	2	2
1	1	2007-05-14	12	2	2	1	0	2	1	1	2	2	2	2	2	2	1	1	40	4	2	2	2	2	2	2	2	2	2	2	2	2	2	1	#NULL!	1	1	41	0	2	2	2	2	2	2	2	2	2	2
1	1	2007-01-07	12	2	2	2	0	3	1	1	2	1	2	2	2	2	1	1	43	4	2	2	2	2	2	2	2	2	2	2	2	2	2	1	#NULL!	1	1	42	3	2	2	2	2	2	2	2	2	2	2
2	1	2005-11-17	14	2	1	1	1	2	1	1	2	2	2	2	2	2	1	1	39	3	2	2	2	2	2	2	2	2	2	2	2	2	2	1	#NULL!	1	1	38	0	2	2	2	2	2	2	2	2	2	2
2	6	2006-01-26	13	2	1	1	0	5	1	2	1	2	2	2	2	2	2	#NULL!	#NULL!	#NULL!	#NULL!	#NULL!	#NULL!	#NULL!	#NULL!	#NULL!	#NULL!	#NULL!	#NULL!	#NULL!	#NULL!	#NULL!	#NULL!	#NULL!	11	1	1	42	4	2	2	2	2	2	2	2	2	2	2
2	6	2003-09-01	16	3	2	1	0	3	1	1	1	2	2	2	2	2	1	1	42	5	2	2	1	2	2	2	2	2	2	2	2	2	2	2	#NULL!	1	1	45	4	2	2	2	2	2	2	2	2	2	2
1	1	2003-04-06	16	3	2	2	0	4	1	1	2	1	2	2	2	2	1	1	42	2	2	2	2	2	2	2	2	2	2	2	2	2	2	1	#NULL!	1	1	40	3	2	2	2	2	2	2	2	2	2	2
1	3	2003-02-01	16	3	2	1	0	4	1	1	1	2	2	2	2	2	1	1	46	5	2	2	2	2	1	2	2	2	2	2	2	2	2	2	#NULL!	1	1	43	4	2	2	2	2	2	2	2	2	2	2
1	2	2002-04-28	17	3	2	2	2	5	1	1	1	1	2	2	2	1	1	1	47	4	2	2	2	2	2	2	2	2	2	2	2	2	1	2	#NULL!	1	1	41	5	2	2	2	2	2	2	2	2	2	2
1	6	2007-04-08	12	2	2	2	1	14	1	1	2	1	1	1	2	2	1	1	38	5	2	2	2	2	2	2	2	2	2	2	2	2	2	1	#NULL!	1	1	40	5	2	2	2	2	2	2	2	2	2	2
2	5	2006-04-19	13	2	2	2	1	5	1	1	1	1	2	2	2	2	1	1	37	3	2	2	2	2	2	2	2	2	2	2	2	2	2	1	#NULL!	1	1	36	4	2	2	2	2	2	2	2	2	2	2
2	1	2006-08-21	13	2	2	1	0	1	1	2	2	2	2	2	2	2	1	1	42	3	2	2	2	2	2	2	2	2	2	2	2	2	2	1	#NULL!	1	1	45	4	2	2	2	2	2	2	2	2	2	2
1	1	2006-11-06	13	2	2	2	1	7	2	1	1	2	1	1	2	2	1	2	#NULL!	3	2	2	2	2	2	2	2	2	2	2	2	2	2	1	#NULL!	1	2	#NULL!	3	2	2	2	2	2	2	2	2	2	2
2	6	2006-02-23	13	2	2	2	0	2	1	1	2	2	2	2	2	2	1	1	43	3	2	2	1	2	2	2	2	2	2	2	2	2	2	2	#NULL!	1	1	38	3	2	2	2	2	2	2	2	2	2	2
2	6	2005-11-11	14	2	2	2	0	3	1	1	2	1	2	2	2	2	1	1	45	2	2	2	2	2	2	2	2	2	2	2	2	2	2	1	#NULL!	1	1	36	3	2	2	2	2	2	2	2	2	2	2
2	1	2006-10-22	13	2	2	1	0	2	1	2	1	2	2	2	2	2	1	1	45	0	2	2	2	2	2	2	2	2	2	2	2	2	2	1	#NULL!	1	1	44	4	2	2	2	2	2	2	2	2	2	2
1	3	2007-05-02	12	2	2	1	0	4	1	1	1	2	2	2	2	2	1	1	39	4	2	2	2	2	2	2	2	2	2	2	2	2	2	1	#NULL!	1	1	32	4	2	2	2	2	2	2	2	2	2	2
1	1	2004-07-26	15	3	2	1	1	3	1	1	1	2	2	2	2	2	1	1	50	5	2	2	2	2	2	2	2	2	2	2	2	2	2	1	#NULL!	1	1	42	5	2	2	2	2	2	2	2	2	2	2
2	1	2002-10-19	17	3	2	2	0	5	1	1	1	1	2	2	2	2	1	1	45	3	2	2	2	2	2	2	2	2	2	2	2	2	2	1	#NULL!	1	1	42	2	2	2	2	2	2	2	2	2	2	2
1	1	2003-09-05	16	3	2	2	0	2	1	1	2	2	2	2	2	2	1	1	48	3	2	2	2	2	2	2	2	2	2	2	2	2	2	1	#NULL!	1	1	46	2	2	2	2	2	2	2	2	2	2	2
1	6	2002-12-22	16	3	2	1	0	2	1	1	2	2	2	2	2	2	1	1	49	5	2	2	2	2	2	2	2	2	2	2	2	2	2	1	#NULL!	1	1	38	5	2	2	2	2	2	2	2	2	2	2
2	3	2003-07-28	16	3	2	1	0	2	1	1	2	2	2	2	2	2	1	1	42	4	2	2	2	2	2	2	2	2	2	2	2	2	2	1	#NULL!	1	1	41	4	2	2	2	2	2	2	2	2	2	2
2	1	2003-07-20	16	3	2	1	0	3	1	1	1	2	2	2	2	2	1	1	40	3	2	2	2	2	2	2	2	2	2	2	2	2	2	1	#NULL!	1	1	38	3	2	2	2	2	2	2	2	2	2	2
1	1	2003-05-06	16	3	2	1	0	2	2	1	1	2	2	2	2	2	1	1	52	4	2	2	2	2	2	2	2	2	2	2	2	2	2	1	#NULL!	1	1	47	3	2	2	2	2	2	2	2	2	2	2
2	6	2007-10-07	12	2	2	1	0	2	1	1	2	2	2	2	2	2	1	2	#NULL!	5	2	2	2	2	2	2	2	2	2	2	2	2	1	2	#NULL!	1	2	#NULL!	5	2	2	2	2	2	2	2	2	2	2
2	3	2006-12-29	12	2	2	2	2	4	1	1	2	1	2	2	2	2	1	1	41	4	2	2	2	2	2	2	2	2	2	2	2	2	2	1	#NULL!	1	1	40	5	2	2	2	2	2	2	2	2	2	2
1	6	2007-05-31	12	2	2	1	1	3	1	1	1	2	2	2	2	2	1	1	43	3	2	2	2	2	2	2	2	2	2	2	2	2	2	1	#NULL!	1	1	44	3	2	2	2	2	2	2	2	2	2	2
1	6	2006-10-10	13	2	2	1	0	6	1	2	2	2	2	2	2	1	1	2	#NULL!	0	2	2	2	2	2	2	2	2	2	2	2	2	1	2	#NULL!	1	1	40	4	2	2	2	2	2	2	2	2	2	2
1	1	2005-09-22	14	2	2	2	0	3	1	1	2	1	2	2	2	2	1	2	#NULL!	2	2	2	2	2	2	2	2	2	2	2	2	2	2	1	#NULL!	1	2	#NULL!	2	2	2	2	2	2	2	2	2	2	2
1	1	2006-02-01	13	2	2	1	0	4	1	1	1	2	2	2	2	2	1	1	40	4	2	2	2	2	2	2	2	2	2	2	2	2	2	1	#NULL!	1	1	37	3	2	2	2	2	2	2	2	2	2	2
1	2	2006-09-10	13	2	1	1	0	4	1	1	1	2	2	2	2	2	1	1	41	4	2	2	2	2	2	2	2	2	2	2	2	2	2	1	#NULL!	1	1	40	4	2	2	2	2	2	2	2	2	2	2
1	4	2006-05-02	13	2	2	1	0	4	1	1	2	2	1	2	1	2	1	2	#NULL!	0	2	2	2	2	2	2	2	2	2	2	2	2	2	1	#NULL!	1	2	#NULL!	2	2	2	2	2	2	2	2	2	2	2
2	1	2007-10-27	12	2	2	1	1	2	1	1	2	2	2	2	2	2	1	1	53	3	2	2	2	2	2	2	2	2	2	2	2	2	2	1	#NULL!	1	1	50	4	2	2	2	2	2	2	2	2	2	2
1	1	2007-03-23	12	2	2	2	0	9	1	1	1	1	1	1	1	2	1	2	#NULL!	0	2	2	2	2	2	2	2	2	2	2	2	2	2	1	#NULL!	1	2	#NULL!	0	2	2	2	2	2	2	2	2	2	2
1	1	2007-01-05	12	2	2	1	0	6	1	1	2	2	1	2	1	2	1	2	#NULL!	4	2	2	1	2	2	2	2	2	2	2	2	2	2	2	#NULL!	1	2	#NULL!	3	2	2	2	2	2	2	2	2	2	2
1	6	2007-06-21	12	2	2	2	0	5	1	1	1	2	2	2	2	2	1	1	35	2	2	2	2	2	2	2	2	2	2	2	2	2	2	1	#NULL!	1	1	34	2	2	2	2	2	2	2	2	2	2	2
2	5	2006-04-15	13	2	1	1	0	2	1	1	2	2	2	2	2	2	1	1	41	5	2	2	2	2	2	2	2	2	2	2	2	2	2	1	#NULL!	1	1	43	5	2	2	2	2	2	2	2	2	2	2
2	6	2006-08-16	13	2	2	2	0	2	1	1	2	2	2	2	2	2	1	1	49	4	2	2	2	2	2	2	2	2	2	2	2	2	2	1	#NULL!	1	1	46	5	2	2	2	2	2	2	2	2	2	2
2	1	2006-02-01	13	2	1	2	1	3	1	1	2	1	2	2	2	2	1	1	40	3	2	2	2	2	2	2	2	2	2	2	2	2	2	1	#NULL!	1	1	36	4	2	2	2	2	2	2	2	2	2	2
1	1	2003-07-30	16	3	1	1	0	2	1	1	2	2	2	2	2	2	1	1	42	5	2	2	2	2	2	2	2	2	2	2	2	2	2	1	#NULL!	1	1	42	5	2	2	2	2	2	2	2	2	2	2
2	3	2003-03-03	16	3	2	1	0	3	1	1	1	2	2	2	2	2	1	1	45	5	2	2	2	2	2	2	2	2	2	2	2	2	2	1	#NULL!	1	1	46	5	2	2	2	2	2	2	2	2	2	2
2	1	2003-05-09	16	3	2	1	0	1	1	2	2	2	2	2	2	2	1	1	39	4	2	2	2	2	2	2	2	2	2	2	2	2	2	1	#NULL!	1	1	41	4	2	2	2	2	2	2	2	2	2	2
1	1	2002-11-25	17	3	2	1	0	1	1	2	2	2	2	2	2	2	1	1	46	3	2	2	2	2	2	2	2	2	2	2	2	2	2	1	#NULL!	1	1	43	5	2	2	2	2	2	2	2	2	2	2
1	1	2007-04-13	12	2	2	2	0	4	1	1	1	1	2	2	2	2	1	1	41	3	2	2	2	2	2	2	2	2	2	2	2	2	2	1	#NULL!	1	1	38	3	2	2	2	2	2	2	2	2	2	2
1	1	2007-05-13	12	2	2	1	0	2	2	2	1	2	2	2	2	2	1	1	46	3	2	2	2	2	2	2	2	2	2	2	2	2	2	1	#NULL!	1	1	41	2	2	2	2	2	2	2	2	2	2	2
1	1	2006-09-10	13	2	2	1	1	4	1	1	2	2	2	1	2	1	1	1	41	5	2	2	2	2	2	2	2	2	2	2	2	2	2	1	#NULL!	1	1	40	5	2	2	2	2	2	2	2	2	2	2
2	1	2007-04-23	12	2	2	1	1	4	1	2	1	2	2	2	1	2	1	2	#NULL!	3	2	2	2	2	2	2	2	2	2	2	2	2	2	1	#NULL!	1	1	42	3	2	2	2	2	2	2	2	2	2	2
2	3	2007-06-08	12	2	2	1	0	2	1	2	1	2	2	2	2	2	1	1	43	5	2	2	2	2	2	2	2	2	2	2	2	2	2	1	#NULL!	1	1	36	5	2	2	2	2	2	2	2	2	2	2
1	1	2007-05-21	12	2	2	2	0	4	2	1	2	2	2	2	2	1	1	1	32	3	2	2	2	2	2	2	2	2	2	2	2	2	2	1	#NULL!	1	1	32	3	2	2	2	2	2	2	2	2	2	2
1	1	2006-12-13	12	2	2	2	4	3	1	1	2	1	2	2	2	2	1	1	41	2	2	2	1	2	2	2	2	2	2	2	2	2	2	2	#NULL!	1	2	#NULL!	0	2	2	2	2	2	2	2	2	2	2
1	1	2003-10-31	16	3	2	2	0	2	1	1	2	2	2	2	2	2	1	1	50	5	2	2	2	2	2	2	2	2	2	2	2	2	1	2	#NULL!	1	1	49	1	2	2	2	2	2	2	2	2	2	2
2	1	2005-08-20	14	2	2	2	2	3	1	1	2	1	2	2	2	2	1	2	#NULL!	3	2	2	2	2	2	2	2	2	2	2	2	2	2	1	#NULL!	1	2	#NULL!	3	2	2	2	2	2	2	2	2	2	2
1	1	2002-09-27	17	3	2	2	2	5	1	1	1	1	2	2	2	2	1	1	44	3	2	2	2	2	2	2	2	2	2	2	2	2	2	1	#NULL!	1	1	42	3	2	2	2	2	2	2	2	2	2	2
2	1	2002-12-31	16	3	2	2	0	2	1	2	2	1	2	2	2	2	1	2	#NULL!	2	2	2	2	2	2	2	2	2	2	2	2	2	1	2	#NULL!	1	1	43	2	2	2	2	2	2	2	2	2	2	2
2	1	2002-08-12	17	3	2	2	0	4	1	1	1	1	2	2	2	2	1	1	42	2	2	2	2	2	2	2	2	2	2	2	2	2	1	2	#NULL!	1	1	42	4	2	2	2	2	2	2	2	2	2	2
2	1	2002-08-17	17	3	1	1	0	2	1	1	2	2	2	2	2	2	1	1	47	4	2	2	2	2	2	2	2	2	2	2	2	2	2	1	#NULL!	1	1	47	4	2	2	2	2	2	2	2	2	2	2
2	1	2002-02-14	17	3	2	2	1	3	1	1	2	1	2	2	2	2	1	1	47	2	2	2	2	2	2	2	2	2	2	2	2	2	2	1	#NULL!	1	1	42	3	2	2	2	2	2	2	2	2	2	2
2	6	2002-09-19	17	3	2	1	0	3	1	1	1	2	2	2	2	2	1	1	45	4	2	2	2	2	2	2	2	2	2	2	2	2	2	1	#NULL!	1	1	44	5	2	2	2	2	2	2	2	2	2	2
1	3	2005-12-18	13	2	2	1	0	4	1	1	1	2	2	2	2	2	1	1	37	4	2	2	2	2	2	2	2	2	2	2	2	2	1	2	#NULL!	1	1	37	5	2	2	2	2	2	2	2	2	2	2
2	1	2002-10-20	17	3	2	2	0	6	1	1	1	1	2	2	2	1	1	1	41	3	2	2	2	2	2	2	2	2	2	2	2	2	1	2	#NULL!	1	1	42	2	2	2	2	2	2	2	2	2	2	2
2	1	2006-10-07	13	2	2	2	2	3	2	1	1	2	2	2	2	2	1	1	36	4	2	2	2	2	2	2	2	2	2	2	2	2	2	1	#NULL!	1	1	33	3	2	2	2	2	2	2	2	2	2	2
2	1	2006-02-28	13	2	2	2	2	3	1	1	2	1	2	2	2	2	1	1	42	4	2	2	2	2	2	2	2	2	2	2	2	2	2	1	#NULL!	1	1	42	4	2	2	2	2	2	2	2	2	2	2
2	1	2006-01-03	13	2	2	2	0	3	1	1	2	1	2	2	2	2	1	1	37	3	2	2	2	2	2	2	2	2	2	2	2	2	2	1	#NULL!	1	1	35	3	2	2	2	2	2	2	2	2	2	2
1	1	2006-10-23	13	2	2	2	0	4	1	1	1	1	2	2	2	2	1	1	43	4	2	2	2	2	2	2	2	2	2	2	2	2	2	1	#NULL!	1	1	41	5	2	2	2	2	2	2	2	2	2	2
1	6	2005-12-18	13	2	2	1	0	2	1	1	2	2	2	2	2	2	1	1	42	4	2	2	1	2	2	2	2	2	2	2	2	2	2	2	#NULL!	1	1	39	4	2	2	2	2	2	2	2	2	2	2
1	2	2005-06-12	14	2	1	1	0	2	1	1	2	2	2	2	2	2	1	1	44	4	2	2	2	2	2	2	2	2	2	2	2	2	2	1	#NULL!	1	1	34	4	2	2	2	2	2	2	2	2	2	2
2	6	2007-04-12	12	2	2	1	0	3	2	1	1	2	2	2	2	2	1	2	#NULL!	4	2	2	2	2	2	2	2	2	2	2	2	2	2	1	#NULL!	1	2	#NULL!	4	2	2	2	2	2	2	2	2	2	1
1	1	2003-03-26	16	3	2	1	0	2	1	1	2	2	2	2	2	2	1	1	42	4	2	2	2	2	2	2	2	2	2	2	2	2	2	1	#NULL!	1	1	40	2	2	2	2	2	2	2	2	2	2	2
1	1	2002-12-27	16	3	2	2	0	1	2	1	2	2	2	2	2	2	1	1	46	4	2	2	2	2	2	2	2	2	2	2	2	2	2	1	#NULL!	1	1	45	4	2	2	2	2	2	2	2	2	2	2
2	1	2006-12-01	13	2	2	2	0	2	1	1	2	2	2	2	2	2	1	1	51	4	2	2	2	2	2	2	2	2	2	2	2	2	2	1	#NULL!	1	1	49	4	2	2	2	2	2	2	2	2	2	2
2	1	2006-08-19	13	2	2	1	0	3	1	1	1	2	2	2	2	2	1	1	36	4	2	2	2	2	2	2	2	2	2	2	2	2	2	1	#NULL!	1	1	36	4	2	2	2	2	2	2	2	2	2	2
2	1	2005-02-09	14	2	2	2	1	3	1	1	2	1	2	2	2	2	1	2	#NULL!	3	2	2	2	2	2	2	2	2	2	2	2	2	2	1	#NULL!	1	2	#NULL!	2	2	2	2	2	2	2	2	2	2	2
1	6	2006-03-01	13	2	2	1	0	5	1	2	1	1	2	2	2	2	1	1	37	0	2	2	2	2	2	2	2	2	2	2	2	2	2	1	#NULL!	1	1	33	5	2	2	2	2	2	2	2	2	2	2
1	1	2002-11-16	17	3	2	1	0	2	1	1	2	2	2	2	2	2	1	1	39	5	2	2	2	1	2	2	2	2	2	2	2	2	2	2	#NULL!	1	1	39	4	2	2	2	2	2	2	2	2	2	2
1	6	2003-10-31	16	3	2	1	1	2	1	1	2	2	2	2	2	2	1	1	44	5	2	2	2	2	2	2	2	2	2	2	2	2	2	1	#NULL!	1	1	43	5	2	2	2	2	2	2	2	2	2	2
1	1	2003-06-19	16	3	2	1	0	2	1	1	2	2	2	2	2	2	1	2	#NULL!	0	2	2	2	2	2	2	2	2	2	2	2	2	2	1	#NULL!	1	2	#NULL!	4	2	2	2	2	2	2	2	2	2	2
2	1	2003-02-17	16	3	2	2	1	3	1	1	2	1	2	2	2	2	1	1	42	3	2	2	2	2	2	2	2	2	2	2	2	2	2	1	#NULL!	1	1	41	5	2	2	2	2	2	2	2	2	2	2
2	1	2002-11-11	17	3	2	1	0	5	1	1	2	2	2	2	2	2	1	1	40	5	2	2	2	2	2	2	2	2	2	2	2	2	2	1	#NULL!	1	1	42	5	2	2	2	2	2	2	2	2	2	2
1	6	2006-08-02	13	2	1	1	0	3	1	1	1	2	2	2	2	2	1	1	43	5	2	2	2	2	2	2	2	2	2	2	2	2	2	1	#NULL!	1	1	42	5	2	2	2	2	2	2	2	2	2	2
1	2	2006-06-17	13	2	2	2	1	3	1	1	2	1	2	2	2	2	1	1	41	3	2	2	2	2	2	2	2	2	2	2	2	2	2	1	#NULL!	1	1	40	3	2	2	2	2	2	2	2	2	2	2
1	5	2005-11-11	14	2	2	1	0	5	1	1	1	2	2	2	2	2	1	1	42	5	2	2	2	2	2	2	2	2	2	2	2	2	2	1	#NULL!	1	1	40	5	2	2	1	2	2	2	2	2	2	2
2	1	2006-12-26	12	2	2	2	0	5	1	1	1	1	2	2	2	2	1	1	47	4	2	2	2	2	2	2	2	2	2	2	2	2	2	1	#NULL!	1	1	38	3	2	2	2	2	2	2	2	2	2	2
2	3	2006-10-01	13	2	2	1	1	2	1	1	2	2	2	2	2	2	1	1	44	5	2	2	2	2	2	2	2	2	2	2	2	2	2	1	#NULL!	1	1	37	5	2	2	2	2	2	2	2	2	2	2
1	6	2006-11-13	13	2	2	2	0	3	1	1	2	1	2	2	2	2	1	1	38	3	2	2	2	2	2	2	2	2	2	2	2	2	2	1	#NULL!	1	1	36	4	2	2	2	2	2	2	2	2	2	2
2	1	2006-01-10	13	2	2	1	0	4	1	1	1	2	2	2	2	2	1	1	41	3	2	2	2	1	2	2	2	2	2	2	2	2	2	2	#NULL!	1	1	42	3	2	2	2	2	2	2	2	2	2	2
2	6	2006-06-02	13	2	2	1	0	2	1	1	2	2	2	2	2	2	1	1	44	3	2	2	2	2	2	2	2	2	2	2	2	2	2	1	#NULL!	1	1	41	4	2	2	2	2	2	2	2	2	2	2
2	6	2005-11-20	14	2	2	1	0	4	1	1	1	2	2	2	2	2	1	1	41	5	2	2	2	2	2	2	2	2	2	2	2	2	1	2	#NULL!	1	1	41	5	2	2	2	2	2	2	2	2	2	2
1	6	2005-10-23	14	2	2	1	0	2	1	1	2	2	2	2	2	2	1	1	39	5	1	2	2	2	2	2	2	2	2	2	2	2	2	2	#NULL!	1	1	39	5	2	2	2	2	2	2	2	2	2	2
2	1	2003-07-27	16	3	2	2	0	6	1	1	2	1	2	2	2	2	1	1	40	2	1	2	2	2	2	2	2	2	2	2	2	2	2	2	#NULL!	1	1	37	2	2	2	2	2	2	2	2	2	2	2
1	1	2004-06-16	15	3	2	1	0	4	1	1	1	2	2	2	2	2	1	1	45	4	2	2	1	2	2	2	2	2	2	2	2	2	2	2	#NULL!	1	1	40	4	2	2	2	2	2	2	2	2	2	2
2	5	2003-01-20	16	3	2	1	0	3	1	1	1	2	2	2	2	2	1	1	48	5	2	2	2	2	2	2	2	2	2	2	2	2	2	1	#NULL!	1	1	47	5	2	2	2	2	2	2	2	2	2	2
2	3	2002-10-06	17	3	2	1	0	3	1	2	1	2	1	2	2	2	1	2	#NULL!	5	2	2	2	2	2	2	2	2	2	2	2	2	2	1	#NULL!	1	2	#NULL!	4	2	2	2	2	2	2	2	2	2	2
2	1	2003-03-29	16	3	2	1	0	2	1	1	2	2	2	2	2	2	1	1	46	2	2	2	2	2	2	2	2	2	2	2	2	2	2	1	#NULL!	1	1	44	4	2	2	2	2	2	2	2	2	2	2
2	1	2002-10-25	17	3	2	2	2	7	1	1	2	1	2	2	2	2	1	1	46	3	2	2	2	2	2	2	2	2	2	2	2	2	2	1	#NULL!	1	1	39	1	2	2	2	2	2	2	2	2	2	2
2	1	2003-03-08	16	3	2	2	0	3	1	2	2	1	2	2	2	2	1	2	#NULL!	2	2	2	2	2	2	1	2	2	2	2	2	2	2	2	#NULL!	1	2	#NULL!	3	2	2	2	2	2	2	2	2	2	2
2	1	2002-01-14	17	3	2	2	0	4	1	1	2	1	2	2	2	2	1	1	42	3	2	2	2	2	2	2	2	2	2	2	2	2	2	1	#NULL!	1	1	38	2	2	2	2	2	2	2	2	2	2	2
2	6	2003-05-24	16	3	2	2	1	3	1	1	2	1	2	2	2	2	1	1	54	2	2	2	2	2	2	2	2	2	2	2	2	2	1	2	#NULL!	1	1	46	2	2	2	2	2	2	2	2	2	2	2
1	1	2003-09-01	16	3	2	2	1	4	1	2	1	1	1	2	2	2	1	1	44	4	2	2	2	2	2	2	2	2	2	2	2	2	2	1	#NULL!	1	1	42	5	2	2	2	2	2	2	2	2	2	2
1	6	2005-12-06	13	2	1	1	0	2	1	1	2	2	2	2	2	2	1	1	49	4	2	2	1	2	2	2	2	2	2	2	2	2	2	2	#NULL!	1	1	45	4	2	2	2	2	2	2	2	2	2	2
1	6	2007-02-15	12	2	2	1	0	5	2	2	1	2	2	2	2	2	1	2	#NULL!	3	2	2	2	2	2	2	2	2	2	2	2	2	1	2	#NULL!	1	2	#NULL!	4	2	2	2	2	2	2	2	2	2	2
1	1	2006-05-18	13	2	2	2	0	1	1	2	2	2	2	2	2	2	1	1	49	3	2	2	2	2	2	2	2	2	2	2	2	2	2	1	#NULL!	1	1	39	3	2	2	2	2	2	2	2	2	2	2
1	1	2007-02-17	12	2	2	2	0	3	1	1	2	1	2	2	2	2	1	2	#NULL!	0	2	2	2	2	2	2	2	2	2	2	2	2	2	1	#NULL!	1	2	#NULL!	3	2	2	2	2	2	1	2	2	2	2
1	1	2005-11-28	14	2	2	2	1	3	1	1	2	1	2	2	2	2	1	1	40	4	2	2	2	2	2	2	2	2	2	2	2	2	2	1	#NULL!	1	1	38	4	2	2	2	2	2	2	2	2	2	2
2	1	2006-11-24	13	2	2	2	1	5	1	1	1	1	2	2	2	2	1	1	40	3	2	2	2	2	2	2	2	2	2	2	2	2	2	1	#NULL!	1	1	39	3	2	2	2	2	2	2	2	2	2	2
2	3	2006-08-09	13	2	2	1	0	1	1	2	2	2	2	2	2	2	1	2	#NULL!	3	2	2	2	2	2	2	2	2	2	2	2	2	2	1	#NULL!	1	2	#NULL!	3	2	2	2	2	2	2	2	2	2	2
2	1	2006-05-10	13	2	2	2	1	4	1	1	1	1	2	2	2	2	1	2	#NULL!	5	2	2	2	2	2	2	2	2	2	2	2	2	2	1	#NULL!	1	1	39	4	2	2	2	2	2	2	2	2	2	2
1	2	2006-12-20	12	2	2	2	1	2	2	2	1	2	2	2	2	2	1	1	39	5	2	2	2	2	2	2	2	2	2	2	1	2	2	2	#NULL!	1	1	38	5	2	2	2	2	2	2	2	2	2	2
2	3	2006-01-04	13	2	2	1	0	2	1	1	2	2	2	2	2	2	1	1	40	4	2	2	2	2	2	2	2	2	2	2	2	2	2	1	#NULL!	1	1	40	3	2	2	2	2	2	2	2	2	2	2
1	3	2007-01-02	12	2	2	1	0	4	1	1	1	2	2	2	2	2	1	1	43	2	2	2	2	2	2	2	2	2	2	2	2	2	2	1	#NULL!	1	1	40	4	2	2	2	2	2	2	2	2	2	2
2	1	2007-10-13	12	2	2	2	0	2	2	2	1	2	2	2	2	2	1	1	47	3	2	2	2	2	2	2	2	2	2	1	2	2	2	2	#NULL!	1	1	43	4	2	2	2	2	2	2	2	2	2	2
2	6	2007-03-06	12	2	2	2	0	5	1	1	2	1	2	2	2	2	1	1	36	3	2	2	2	2	2	2	2	2	2	2	2	2	2	1	#NULL!	1	1	35	3	2	2	2	2	2	2	2	2	2	2
1	6	2007-01-20	12	2	2	2	0	4	1	1	2	1	2	2	2	2	1	1	47	3	2	2	2	2	2	2	2	2	2	2	2	2	2	1	#NULL!	1	1	46	3	2	2	2	2	2	2	2	2	2	2
1	1	2007-09-03	12	2	2	1	0	2	1	1	2	2	2	2	2	2	1	1	43	5	2	2	1	1	2	2	2	2	2	2	2	2	2	2	#NULL!	1	1	42	4	2	2	2	2	2	2	2	2	2	2
2	1	2005-11-22	14	2	1	2	0	2	1	1	2	2	2	2	2	2	1	1	36	4	2	2	2	2	2	2	2	2	2	2	2	2	2	1	#NULL!	1	1	34	3	2	2	2	2	2	2	2	2	2	2
2	3	2005-11-11	14	2	2	1	0	1	1	2	2	2	2	2	2	2	1	1	44	4	2	2	2	2	2	2	2	2	2	2	2	2	2	1	#NULL!	1	1	37	4	2	2	2	2	2	2	2	2	2	2
1	1	2005-12-04	13	2	2	2	0	4	1	1	1	1	2	2	2	2	1	2	#NULL!	2	2	2	2	2	2	2	2	2	2	2	2	2	2	1	#NULL!	1	2	#NULL!	3	2	2	2	2	2	2	2	2	2	2
1	1	2003-02-22	16	3	2	2	0	3	1	1	2	1	2	2	2	2	1	1	42	3	2	2	2	2	2	2	2	2	2	2	2	2	2	1	#NULL!	1	1	40	2	2	2	2	2	1	2	2	2	2	2
1	1	2003-02-07	16	3	2	1	0	5	1	1	2	2	1	2	1	2	1	1	47	5	2	2	2	2	2	2	2	2	2	2	2	2	2	1	#NULL!	1	1	44	5	2	2	2	2	2	2	2	2	2	2
2	1	2003-03-18	16	3	2	2	0	3	1	1	2	1	2	2	2	2	1	1	50	2	2	2	2	2	2	2	2	2	2	2	2	2	2	1	#NULL!	1	1	49	3	2	2	2	2	2	2	2	2	2	1
1	1	2003-08-29	16	3	2	1	0	4	1	1	1	2	2	2	2	2	1	1	48	4	2	2	2	2	2	2	2	2	2	2	2	2	2	1	#NULL!	1	1	46	4	2	2	2	2	2	2	2	2	2	2
2	1	2007-11-06	12	2	2	2	1	4	1	1	2	1	2	2	2	2	1	2	#NULL!	3	2	2	2	2	2	2	2	2	2	2	2	2	2	1	#NULL!	1	1	36	3	2	2	2	2	2	2	2	2	2	2
2	3	2006-12-19	12	2	2	1	1	2	1	1	2	2	2	2	2	2	1	1	45	3	2	2	2	2	2	2	2	2	2	2	2	2	2	1	#NULL!	1	1	38	3	2	2	2	2	2	2	2	2	2	2
1	5	2007-08-11	12	2	2	1	0	4	2	2	1	2	2	2	2	2	1	1	35	3	2	2	2	2	2	2	2	2	2	2	2	2	2	1	#NULL!	1	1	33	2	2	2	2	2	2	2	2	2	2	2
1	3	2007-02-09	12	2	2	1	1	2	1	1	2	2	2	2	2	2	1	1	55	4	2	2	2	2	2	2	2	2	2	2	2	2	1	2	#NULL!	1	1	40	4	2	1	2	2	2	1	2	2	2	2
1	3	2007-01-08	12	2	2	2	0	5	1	1	1	1	2	2	2	1	1	1	39	3	2	2	2	2	2	2	2	2	2	2	2	2	2	1	#NULL!	1	1	37	3	2	2	2	2	2	2	2	2	2	2
1	1	2006-10-21	13	2	2	2	0	3	1	1	2	1	2	2	2	2	1	2	#NULL!	4	2	2	2	2	2	2	2	2	2	2	2	2	2	1	#NULL!	1	2	#NULL!	5	2	2	2	2	2	2	2	2	2	2
2	2	2006-03-29	13	2	2	1	0	2	1	1	2	2	2	2	2	2	1	1	40	5	2	2	2	2	2	2	2	2	2	2	2	2	2	1	#NULL!	1	1	37	5	2	2	2	2	2	2	2	2	2	2
2	1	2006-04-29	13	2	2	1	0	2	1	1	2	2	2	2	2	2	1	1	41	4	2	2	2	2	2	2	2	2	2	2	2	2	2	1	#NULL!	1	1	38	3	2	2	2	2	2	2	2	2	2	2
2	1	2006-10-31	13	2	2	1	0	4	1	1	2	2	1	2	1	2	1	1	40	4	2	2	2	2	2	2	2	2	2	2	2	2	2	1	#NULL!	1	1	38	4	2	2	2	2	2	2	2	2	2	2
2	2	2007-08-29	12	2	2	2	1	5	1	1	1	1	2	2	2	2	1	1	35	5	2	2	2	2	2	2	2	2	2	2	2	2	2	1	#NULL!	1	1	35	5	2	2	2	2	2	2	2	2	2	2
2	1	2005-08-20	14	2	2	2	0	3	1	1	2	1	2	2	2	2	1	1	36	2	2	2	2	2	2	2	2	2	2	2	2	2	1	2	#NULL!	1	1	37	3	2	2	2	2	2	2	2	2	2	2
2	1	2006-07-28	13	2	2	2	0	4	1	1	1	1	2	2	2	2	1	1	41	5	2	2	2	2	2	2	2	2	2	2	2	2	2	1	#NULL!	1	1	40	5	2	2	2	2	2	2	2	2	2	2
2	3	2005-10-05	14	2	1	1	0	4	1	1	1	2	2	2	2	2	1	1	41	5	2	2	1	2	2	2	2	2	2	2	2	2	2	2	#NULL!	1	1	40	5	2	2	2	2	2	2	2	2	2	2
2	6	2006-02-26	13	2	1	2	0	3	1	1	2	1	2	2	2	2	1	1	40	4	2	2	2	2	2	2	2	2	2	2	2	2	2	1	#NULL!	1	1	37	4	2	2	2	2	2	2	2	2	2	2
1	1	2003-05-15	16	3	2	1	2	3	1	1	1	2	2	2	2	2	1	1	47	4	2	2	2	2	1	2	2	2	2	2	2	2	2	2	#NULL!	1	1	43	3	2	2	2	2	2	2	2	2	2	2
1	1	2003-10-12	16	3	2	1	1	3	1	1	1	2	2	2	2	2	1	1	42	5	2	2	2	2	2	2	2	2	2	2	2	2	1	2	#NULL!	1	1	42	5	2	2	2	2	2	2	2	2	2	2
2	6	2003-03-10	16	3	2	1	1	4	1	1	1	2	2	2	2	2	1	1	48	4	2	2	2	2	2	2	2	2	2	2	2	2	2	1	#NULL!	1	1	43	4	2	2	2	2	2	2	2	2	2	2
1	4	2003-05-30	16	3	2	1	0	3	1	1	1	2	2	2	2	2	1	1	45	4	2	2	2	2	2	2	2	2	2	2	2	2	2	1	#NULL!	1	1	39	4	2	2	2	2	2	2	2	2	2	2
2	1	2003-12-04	15	3	2	2	0	5	1	1	1	1	2	2	2	2	1	1	41	4	2	2	2	2	2	2	2	2	2	2	2	2	2	1	#NULL!	1	1	38	4	2	2	2	2	2	2	2	2	2	2
2	1	2006-10-01	13	2	2	1	0	3	1	1	1	2	2	2	2	2	1	2	#NULL!	5	2	2	2	2	2	2	2	2	2	2	2	2	1	2	#NULL!	1	2	#NULL!	5	2	2	2	2	2	2	2	2	2	2
2	6	2006-12-02	13	2	2	2	1	4	1	1	1	1	2	2	2	2	1	1	47	2	2	2	2	2	2	2	2	2	2	2	2	2	1	2	#NULL!	1	1	36	3	2	2	2	2	2	2	2	2	2	2
2	4	2006-11-10	13	2	2	2	0	3	1	1	2	1	2	2	2	2	1	1	40	4	2	2	2	2	2	2	2	2	2	2	2	2	2	1	#NULL!	1	1	39	3	2	2	2	2	2	2	2	2	2	2
1	1	2007-03-22	12	2	1	1	0	5	1	1	1	2	1	2	2	2	1	2	#NULL!	5	2	2	2	2	2	2	2	2	2	2	2	2	2	1	#NULL!	1	2	#NULL!	5	2	2	2	2	2	2	2	2	2	2
2	1	2006-01-23	13	2	2	2	0	6	1	1	1	1	2	2	2	2	1	1	35	2	2	2	2	2	2	2	2	2	2	2	2	2	2	1	#NULL!	1	1	40	3	2	2	2	2	2	2	2	2	2	2
1	6	2007-07-19	12	2	1	1	0	2	1	1	2	2	2	2	2	2	1	1	42	0	2	2	2	2	2	2	2	2	2	2	2	2	2	1	#NULL!	1	1	36	4	2	2	2	2	2	2	2	2	2	2
2	1	2002-12-27	16	3	2	1	0	6	1	1	1	2	2	1	2	2	1	1	47	4	2	2	2	2	2	2	2	2	2	2	2	2	1	2	#NULL!	1	1	47	4	2	2	2	2	2	2	2	2	2	2
2	1	2002-12-19	16	3	2	1	0	3	1	1	2	2	1	2	2	2	1	2	#NULL!	4	2	2	2	2	2	2	2	2	2	2	2	2	2	1	#NULL!	1	1	44	3	2	2	2	2	2	2	2	2	2	2
1	3	2002-12-27	16	3	2	1	0	2	1	1	2	2	2	2	2	2	1	1	47	3	2	2	2	2	2	2	2	2	2	2	2	2	2	1	#NULL!	1	1	45	3	2	2	2	2	2	2	2	2	2	2
1	1	2006-06-23	13	2	2	1	1	2	1	1	2	2	2	2	2	2	1	1	39	4	2	2	1	2	2	2	2	2	2	2	2	2	2	2	#NULL!	1	1	39	4	2	2	2	2	2	2	2	2	2	2
1	1	2006-01-06	13	2	2	2	1	4	1	1	2	1	2	2	2	2	1	1	51	3	2	2	2	2	2	2	2	2	2	2	2	2	2	1	#NULL!	1	2	#NULL!	3	2	2	2	2	2	2	2	2	2	2
2	3	2006-03-26	13	2	2	2	0	3	2	2	1	1	2	2	2	2	1	1	37	2	2	2	2	2	2	2	2	2	2	2	2	2	1	2	#NULL!	1	1	35	3	2	2	2	2	2	2	2	2	2	2
1	2	2006-07-10	13	2	2	2	0	4	1	1	1	1	2	2	2	2	1	1	44	5	2	2	2	2	2	2	2	2	2	2	2	2	2	1	#NULL!	1	1	38	4	2	2	2	2	2	2	2	2	2	2
1	6	2006-01-23	13	2	2	2	0	6	1	1	1	1	1	2	2	2	1	2	#NULL!	4	2	2	2	2	2	2	2	2	2	2	2	2	2	1	#NULL!	1	1	30	3	2	2	2	2	2	2	2	2	2	2
2	1	2005-11-22	14	2	1	1	0	2	1	1	2	2	2	2	2	2	1	1	42	5	2	2	2	2	2	2	2	2	2	2	2	2	2	1	#NULL!	1	1	40	4	2	2	2	2	2	2	2	2	2	2
1	1	2006-01-05	13	2	2	1	0	2	1	1	2	2	2	2	2	2	1	1	48	4	2	2	2	2	2	2	2	2	2	2	2	2	2	1	#NULL!	1	1	46	4	2	2	2	2	2	2	2	2	2	2
2	3	2007-01-11	12	2	1	2	0	5	2	2	1	2	1	1	2	2	1	2	#NULL!	5	2	2	2	2	2	2	2	2	2	2	2	2	2	1	#NULL!	1	1	39	5	2	2	2	2	2	2	2	2	2	2
1	1	2006-11-10	13	2	2	1	1	2	1	1	2	2	2	2	2	2	1	2	#NULL!	3	2	2	2	2	2	2	2	2	2	2	2	2	2	1	#NULL!	1	2	#NULL!	2	2	2	2	2	2	2	2	2	2	2
2	1	2005-11-06	14	2	2	1	0	1	2	1	2	2	2	2	2	2	1	1	45	4	2	2	2	2	2	2	2	2	2	2	2	2	2	1	#NULL!	1	2	#NULL!	3	2	2	2	2	2	2	2	2	2	2
1	3	2005-10-31	14	2	2	2	0	5	1	1	1	1	2	1	2	2	1	1	43	3	2	2	2	2	2	2	2	2	2	2	2	2	2	1	#NULL!	1	1	41	3	2	2	2	2	2	2	2	2	2	2
2	3	2005-07-21	14	2	2	2	1	3	1	1	2	1	2	2	2	2	1	1	42	2	2	2	2	2	2	2	2	2	2	2	2	2	2	1	#NULL!	1	1	40	2	2	2	2	2	2	2	2	2	2	2
2	1	2006-06-11	13	2	1	2	0	2	1	2	2	1	2	2	2	2	1	1	40	5	2	2	2	2	2	2	2	2	2	2	2	2	2	1	#NULL!	1	1	39	5	2	2	2	2	2	2	2	2	2	2
1	1	2006-12-23	12	2	2	2	0	3	1	1	2	1	2	2	2	2	1	1	41	5	2	2	2	2	2	2	2	2	2	2	2	2	2	1	#NULL!	1	1	31	2	2	2	2	2	2	2	2	2	2	2
1	2	2007-09-27	12	2	2	1	0	2	1	1	2	2	2	2	2	2	1	1	43	4	2	2	2	2	2	2	2	2	2	2	2	2	2	1	#NULL!	1	1	39	4	2	2	2	2	2	2	2	2	2	2
1	1	2007-08-01	12	2	2	1	0	1	1	2	2	2	2	2	2	2	1	2	#NULL!	0	2	2	2	2	2	2	2	2	2	2	2	2	2	1	#NULL!	1	2	#NULL!	4	2	2	2	2	2	2	2	2	2	2
1	1	2007-06-05	12	2	2	2	0	5	1	1	1	1	2	2	2	2	1	1	48	4	2	2	2	2	2	2	2	2	2	2	2	2	1	2	#NULL!	1	1	37	4	2	2	2	2	2	2	2	2	2	2
1	3	2007-08-22	12	2	1	1	0	3	1	1	1	2	2	2	2	2	1	1	40	4	2	2	2	2	2	2	2	2	2	2	2	2	2	1	#NULL!	1	1	38	4	2	2	2	2	2	2	2	2	2	2
1	1	2006-08-30	13	2	2	2	0	2	2	2	2	2	1	2	2	2	1	1	48	2	2	2	2	2	2	2	2	2	2	2	2	2	2	1	#NULL!	1	1	48	2	2	2	2	2	2	2	2	2	2	2
1	6	2007-08-22	12	2	2	2	0	3	1	1	2	1	2	2	2	2	1	1	40	5	2	2	2	2	2	2	2	2	2	2	2	2	2	1	#NULL!	1	1	39	5	2	2	2	2	2	2	2	2	2	2
1	1	2004-12-21	14	2	2	2	1	6	1	1	1	1	1	2	1	2	1	1	45	2	2	2	2	2	2	1	2	2	1	2	2	2	2	2	#NULL!	1	1	45	3	2	2	2	2	2	2	2	2	2	2
2	6	2006-07-04	13	2	2	1	0	3	1	1	1	2	1	1	2	2	1	1	36	5	2	2	2	2	2	2	2	2	2	2	2	2	2	1	#NULL!	1	1	34	5	2	2	2	2	2	2	2	2	2	2
1	1	2005-07-22	14	2	1	1	1	3	1	1	1	2	2	2	2	2	1	2	#NULL!	5	2	2	2	2	2	2	2	2	2	2	2	2	2	1	#NULL!	1	2	#NULL!	5	2	2	2	2	2	2	2	2	2	2
1	1	2005-08-01	14	2	2	1	0	3	1	1	1	2	2	2	2	2	1	1	41	4	2	2	2	2	2	2	2	2	2	2	2	2	2	1	#NULL!	1	1	42	5	2	2	2	2	2	2	2	2	2	2
2	1	2006-05-15	13	2	2	1	0	2	1	2	2	2	1	2	2	2	2	#NULL!	#NULL!	#NULL!	#NULL!	#NULL!	#NULL!	#NULL!	#NULL!	#NULL!	#NULL!	#NULL!	#NULL!	#NULL!	#NULL!	#NULL!	#NULL!	#NULL!	3	1	1	36	4	2	2	2	2	2	2	2	2	2	2
1	1	2006-04-01	13	2	2	1	0	2	1	1	2	2	2	2	2	2	1	1	41	4	2	2	1	2	2	2	2	2	2	2	2	2	2	2	#NULL!	1	1	39	5	2	2	2	2	2	2	2	2	2	2
2	1	2003-12-13	15	3	2	1	1	2	1	1	2	2	2	2	2	2	1	1	44	5	2	2	2	2	2	2	2	2	2	2	2	2	2	1	#NULL!	1	1	43	5	2	2	2	2	2	2	2	2	2	2
2	1	2007-09-12	12	2	2	2	1	3	2	1	2	2	2	2	2	2	1	1	49	5	2	2	2	2	2	2	2	2	2	2	2	2	2	1	#NULL!	1	1	43	2	2	2	2	2	2	2	2	2	2	2
1	1	2003-11-02	16	3	1	1	1	1	2	1	2	2	2	2	2	2	1	1	47	2	2	2	2	2	2	2	2	2	2	2	2	2	1	2	#NULL!	1	1	49	3	2	2	2	2	2	2	2	2	2	2
1	1	2002-10-08	17	3	2	1	0	2	1	1	2	2	2	2	2	2	1	1	41	4	2	2	2	2	2	2	2	2	2	2	2	2	2	1	#NULL!	1	1	40	3	2	2	2	2	2	2	2	2	2	2
1	1	2003-02-16	16	3	2	1	0	1	1	2	2	2	2	2	2	2	1	1	47	4	2	2	2	2	2	2	2	2	2	2	2	2	2	1	#NULL!	1	1	48	4	2	2	2	2	2	2	2	2	2	2
2	1	2003-10-28	16	3	2	1	0	3	1	1	1	2	2	2	2	2	1	1	42	3	2	2	2	2	2	2	2	2	2	2	2	2	2	1	#NULL!	1	1	38	3	2	2	2	2	2	2	2	2	2	2
2	4	2003-02-15	16	3	2	2	0	3	1	1	2	1	2	2	2	2	1	1	52	2	2	2	1	2	2	2	2	2	2	2	2	2	2	2	#NULL!	1	1	49	3	2	2	2	2	2	2	2	2	2	2
2	1	2003-06-29	16	3	2	2	0	2	1	1	2	2	2	2	2	2	1	1	49	2	2	2	2	2	2	2	2	2	2	2	2	2	2	1	#NULL!	1	1	44	2	2	2	2	2	2	2	2	2	2	2
1	3	2002-02-13	17	3	2	2	0	3	2	1	2	1	2	2	2	2	1	1	45	3	2	2	2	2	2	2	2	2	2	2	2	2	2	1	#NULL!	1	1	37	3	2	2	2	2	2	2	2	2	2	2
1	1	2007-07-28	12	2	2	1	0	3	1	2	1	2	1	2	2	2	1	2	#NULL!	3	2	2	2	2	2	2	2	2	2	2	2	2	2	1	#NULL!	1	1	40	3	2	2	2	2	2	2	2	2	2	2
2	1	2006-05-30	13	2	2	2	0	3	1	1	2	1	2	2	2	2	1	1	41	4	2	2	2	2	2	2	2	2	2	2	2	2	2	1	#NULL!	1	1	36	3	2	2	2	2	2	2	2	2	2	2
1	6	2006-10-20	13	2	2	1	0	4	1	1	1	2	2	2	2	2	1	2	#NULL!	3	2	2	2	2	2	2	2	2	2	2	2	2	2	1	#NULL!	1	2	#NULL!	4	2	2	2	2	2	2	2	2	2	2
1	3	2006-08-01	13	2	2	2	0	3	1	1	2	1	2	2	2	2	1	2	#NULL!	4	2	2	1	2	2	2	2	2	2	2	2	2	2	2	#NULL!	1	2	#NULL!	4	2	2	2	2	2	2	2	2	2	2
1	2	2006-08-21	13	2	1	1	0	7	1	1	2	2	2	1	2	2	1	1	49	4	2	2	2	2	2	2	2	2	2	2	2	2	2	1	#NULL!	1	1	43	3	2	2	2	2	2	2	2	2	2	2
1	2	2006-10-17	13	2	2	1	1	2	1	1	2	2	2	2	2	2	1	1	56	3	2	2	2	2	2	2	2	2	2	2	2	2	2	1	#NULL!	1	2	#NULL!	2	2	2	2	2	2	2	2	2	2	2
2	1	2004-04-27	15	3	2	1	0	3	1	1	1	2	2	2	2	2	1	1	48	5	2	2	2	2	2	2	2	2	2	2	2	2	2	1	#NULL!	1	1	45	5	2	2	2	2	2	2	2	2	2	2
1	1	2003-06-06	16	3	2	2	0	3	1	1	2	1	2	2	2	2	1	1	44	3	2	2	2	2	2	2	2	2	2	2	2	2	2	1	#NULL!	1	1	45	3	2	2	2	2	2	2	2	2	2	2
2	1	2002-10-27	17	3	2	2	0	2	1	1	2	2	2	2	2	2	1	1	49	3	2	2	2	2	2	2	2	2	2	2	2	2	2	1	#NULL!	1	1	48	3	2	2	2	2	2	2	2	2	2	2
2	1	2003-04-22	16	3	2	1	0	2	1	2	1	2	2	2	2	2	1	1	47	2	1	2	2	2	2	2	2	2	2	2	2	2	2	2	#NULL!	1	1	36	3	1	1	2	2	2	2	2	2	2	2
2	6	2002-10-25	17	3	2	1	0	4	1	1	1	2	2	2	1	2	1	1	46	3	2	2	2	2	2	2	2	2	2	2	2	2	2	1	#NULL!	1	1	45	4	2	2	2	2	2	2	2	2	2	2
2	1	2002-12-15	16	3	2	2	1	4	1	1	1	1	2	2	2	2	1	1	40	3	2	2	1	2	2	2	2	2	2	2	2	2	2	2	#NULL!	1	1	45	4	2	2	2	2	2	2	2	2	2	2
2	3	2003-04-07	16	3	2	1	1	2	1	1	2	2	2	2	2	2	1	1	46	4	2	2	2	2	2	2	2	2	2	2	2	2	2	1	#NULL!	1	1	43	4	2	2	2	2	2	2	2	2	2	2
2	1	2007-04-26	12	2	2	1	0	2	1	1	2	2	2	2	2	2	1	2	#NULL!	3	2	2	2	2	2	2	2	2	2	2	2	2	2	1	#NULL!	1	2	#NULL!	0	2	2	2	2	2	2	2	2	2	2
1	6	2006-05-03	13	2	1	1	0	2	1	1	2	2	2	2	2	2	1	1	50	4	2	2	2	2	2	2	2	2	2	2	2	2	2	1	#NULL!	1	1	51	5	2	2	2	2	2	2	2	2	2	2
1	1	2006-09-05	13	2	2	1	1	2	1	1	2	2	2	2	2	2	1	1	43	2	2	2	1	1	2	2	2	2	2	2	2	2	2	2	#NULL!	1	1	42	2	2	2	1	2	2	2	2	2	2	1
2	1	2005-11-16	14	2	2	2	0	3	1	1	2	1	2	2	2	2	1	2	#NULL!	3	2	2	2	2	2	2	2	2	2	2	2	2	2	1	#NULL!	1	2	#NULL!	1	2	2	2	2	2	2	2	2	2	2
2	6	2007-09-14	12	2	2	1	2	8	1	1	1	2	1	1	1	2	1	1	41	0	2	2	2	2	2	2	2	2	2	2	2	2	1	2	#NULL!	1	1	40	4	2	2	2	2	2	2	2	2	2	2
1	1	2002-07-11	17	3	2	2	0	3	1	1	2	1	2	2	2	2	1	2	#NULL!	3	2	2	2	2	2	2	2	2	2	2	2	2	1	2	#NULL!	1	2	#NULL!	1	2	2	2	2	2	2	2	2	2	2
2	3	2002-12-10	16	3	2	2	0	5	1	1	1	1	2	2	2	2	1	1	49	2	2	2	2	2	2	2	2	2	2	2	2	2	2	1	#NULL!	1	1	49	3	2	2	2	2	2	2	2	2	2	2
2	1	2003-11-04	16	3	2	2	1	5	1	1	1	1	2	2	2	2	1	1	41	3	2	2	2	2	2	2	2	2	2	2	2	2	1	2	#NULL!	1	1	36	2	2	2	2	2	2	2	2	2	2	2
1	3	2007-09-20	12	2	2	1	0	2	1	1	2	2	2	2	2	2	1	1	36	3	2	2	2	2	2	2	2	2	2	2	2	2	2	1	#NULL!	1	1	30	2	2	2	2	2	2	2	2	2	2	2
1	1	2007-03-30	12	2	2	2	0	4	2	1	1	2	2	2	2	1	1	1	45	3	2	2	2	2	2	2	2	2	2	2	2	2	1	2	#NULL!	1	1	36	4	2	2	2	2	2	2	2	2	2	2
2	1	2007-04-02	12	2	2	1	0	4	1	1	1	2	2	2	2	2	1	1	42	3	2	2	2	2	2	2	2	2	2	2	2	2	2	1	#NULL!	1	1	42	4	2	2	1	2	2	2	2	2	2	2
1	6	2006-04-23	13	2	2	2	0	3	1	2	1	1	2	2	2	2	1	1	40	5	2	2	2	2	2	2	2	2	2	2	2	2	2	1	#NULL!	1	1	41	5	2	2	2	2	2	2	2	2	2	2
1	3	2007-01-01	12	2	2	2	0	4	1	1	2	1	2	2	2	2	1	1	41	2	2	2	2	2	2	2	2	2	2	2	2	2	2	1	#NULL!	1	1	42	3	2	2	2	2	2	2	2	2	2	2
2	1	2007-03-24	12	2	2	2	0	3	1	1	2	1	2	2	2	2	1	1	48	3	2	2	2	2	2	2	2	2	2	2	2	2	2	1	#NULL!	1	1	39	2	2	2	2	2	2	2	2	2	2	2
2	5	2007-06-21	12	2	2	1	0	4	1	1	1	2	2	2	2	2	1	1	45	4	2	2	2	2	2	2	2	2	2	2	2	2	2	1	#NULL!	1	1	39	4	2	2	2	2	2	2	2	2	2	2
2	6	2006-01-08	13	2	2	2	0	5	1	1	1	1	2	2	2	2	1	1	45	5	2	2	2	2	2	2	2	2	2	2	2	2	2	1	#NULL!	1	1	41	5	2	2	2	2	2	2	2	2	2	2
1	1	2002-08-18	17	3	2	1	0	2	1	1	2	2	2	2	2	2	1	1	48	5	2	2	1	2	2	2	2	2	2	2	2	2	2	2	#NULL!	1	1	47	5	2	2	2	2	2	2	2	2	2	2
1	1	2002-03-20	17	3	2	1	3	3	1	1	2	2	2	2	2	2	1	1	41	4	2	2	2	2	2	2	2	2	2	2	2	2	2	1	#NULL!	1	1	40	4	2	2	2	2	2	2	2	2	2	2
1	6	2003-07-06	16	3	2	1	0	2	1	1	2	2	2	2	2	2	1	1	43	4	2	2	1	2	2	2	2	2	2	2	2	2	2	2	#NULL!	1	1	40	4	2	2	2	2	2	2	2	2	2	2
2	3	2003-04-06	16	3	2	1	0	2	1	1	2	2	2	2	2	2	1	1	44	4	2	2	1	2	2	2	2	2	2	2	2	2	1	2	#NULL!	1	1	44	5	2	2	2	2	2	2	2	2	2	2
1	4	2003-08-12	16	3	2	1	0	3	1	1	1	2	2	2	2	2	1	1	46	5	2	2	2	1	2	2	2	1	2	2	2	2	2	2	#NULL!	1	1	42	4	2	2	2	2	2	2	2	2	2	2
2	1	2003-10-09	16	3	2	1	0	2	1	1	2	2	2	2	2	2	1	1	41	4	2	2	2	2	2	2	2	2	2	2	2	2	2	1	#NULL!	1	1	40	5	2	2	2	2	2	2	2	2	2	2
1	3	2003-11-15	16	3	2	2	0	3	1	1	2	1	2	2	2	2	1	1	46	4	2	2	2	2	2	2	2	2	2	2	2	2	2	1	#NULL!	1	1	40	2	2	2	2	2	2	2	2	2	2	2
1	6	2006-05-31	13	2	2	1	0	4	1	1	1	2	1	2	2	2	1	1	50	0	2	2	1	2	2	1	2	1	2	2	2	2	2	2	#NULL!	1	1	44	5	2	2	2	2	2	2	2	2	2	2
2	6	2003-02-03	16	3	2	2	0	4	1	1	1	1	2	2	2	2	1	1	49	3	2	2	1	2	2	2	2	2	2	2	2	2	2	2	#NULL!	1	1	48	3	2	2	2	2	2	2	2	2	2	2
2	3	2003-08-31	16	3	2	1	0	2	1	1	2	2	2	2	2	2	1	1	43	5	2	2	2	2	2	2	2	2	2	2	2	2	2	1	#NULL!	1	1	42	5	2	2	2	2	2	2	2	2	2	2
2	1	2002-12-22	16	3	2	2	0	4	1	1	1	2	2	2	2	2	1	1	47	3	2	2	2	2	2	2	2	2	2	2	2	2	1	2	#NULL!	1	1	41	2	2	2	2	2	2	2	2	2	2	2
2	3	2003-02-01	16	3	2	2	0	3	1	1	2	1	2	2	2	2	1	1	43	0	2	2	2	2	2	2	2	2	2	2	2	2	2	1	#NULL!	1	1	39	0	2	2	2	2	2	2	2	2	2	2
1	2	2006-08-08	13	2	2	2	0	5	1	1	1	1	2	2	2	2	1	1	47	3	2	2	2	2	2	2	2	2	2	2	2	2	2	1	#NULL!	1	1	45	3	2	2	2	2	2	2	2	2	2	2
1	1	2006-01-08	13	2	2	1	1	3	1	1	2	2	2	2	2	1	1	1	45	5	2	2	2	2	2	2	2	2	2	2	2	2	2	1	#NULL!	1	1	45	3	2	2	2	2	2	2	2	2	2	2
1	1	2005-08-13	14	2	2	2	0	3	1	1	2	1	2	2	2	2	1	1	36	4	2	2	2	2	2	2	2	2	2	2	2	2	2	1	#NULL!	1	1	34	3	2	2	2	2	2	2	2	2	2	2
1	1	2005-10-16	14	2	2	1	0	2	1	1	2	2	2	2	2	2	1	1	41	4	2	2	2	2	2	2	2	2	2	2	2	2	2	1	#NULL!	1	1	39	4	2	2	2	2	2	2	2	2	2	2
2	1	2005-09-08	14	2	1	1	0	2	1	1	2	2	2	2	2	2	1	1	45	3	2	2	2	2	2	2	2	2	2	2	2	2	1	2	#NULL!	1	1	37	2	2	2	2	1	2	2	2	2	2	1
2	1	2005-07-07	14	2	2	2	1	2	1	1	2	2	2	2	2	2	1	1	50	3	2	2	2	2	2	2	2	2	2	2	2	2	2	1	#NULL!	1	1	46	1	2	2	2	2	2	2	2	2	2	2
2	1	2006-10-26	13	2	2	2	1	10	1	1	2	1	1	2	1	2	1	1	38	4	2	2	2	2	2	2	2	2	2	2	2	2	2	1	#NULL!	1	1	39	4	2	2	2	2	2	2	2	2	2	2
2	1	2007-04-05	12	2	2	2	0	4	1	1	2	1	2	2	2	2	1	1	51	3	2	2	2	2	2	2	2	2	2	2	2	2	2	1	#NULL!	1	1	47	3	2	2	2	2	2	2	2	2	2	2
2	6	2007-07-27	12	2	2	1	0	2	1	1	2	2	2	2	2	2	1	1	36	0	2	2	2	2	2	2	2	2	2	2	2	2	2	1	#NULL!	1	1	36	0	2	2	2	2	2	2	2	2	2	2
2	1	2006-11-17	13	2	2	2	0	5	1	1	1	1	2	2	2	2	1	1	40	4	2	2	2	2	2	2	2	2	2	2	2	2	2	1	#NULL!	1	1	36	4	2	2	2	2	2	2	2	2	2	2
2	3	2007-08-17	12	2	2	2	0	4	1	1	1	1	2	2	2	2	1	1	40	3	2	2	2	2	2	2	2	2	2	2	2	2	2	1	#NULL!	1	1	35	3	2	2	2	2	2	2	2	2	2	2
2	1	2003-01-25	16	3	1	1	0	2	1	1	2	2	2	2	2	2	1	1	43	5	2	2	2	2	2	2	2	2	2	2	2	2	2	1	#NULL!	1	1	40	5	2	2	2	2	2	2	2	2	2	2
2	3	2006-12-12	12	2	2	1	3	2	1	1	2	2	2	2	2	2	1	1	40	4	2	2	2	2	2	2	2	2	2	2	2	2	2	1	#NULL!	1	1	38	4	2	2	2	2	2	2	2	2	2	2
2	1	2007-01-05	12	2	2	1	0	3	1	2	2	2	2	2	2	2	1	1	43	4	2	2	2	2	2	2	2	2	2	2	2	2	2	1	#NULL!	1	1	40	3	2	2	2	2	2	2	2	2	2	2
1	2	2003-01-24	16	3	2	1	0	5	1	1	1	2	1	2	2	2	1	1	54	5	2	2	2	2	2	2	2	2	2	2	2	2	2	1	#NULL!	1	1	43	5	2	2	2	2	2	2	2	2	2	2
1	3	2003-02-25	16	3	2	1	2	2	1	1	2	2	2	2	2	2	1	2	#NULL!	3	2	2	2	2	2	2	2	2	2	2	2	2	2	1	#NULL!	1	2	#NULL!	2	2	2	2	2	2	2	2	2	2	2
1	1	2002-07-25	17	3	2	2	1	4	1	1	1	1	2	2	2	2	1	1	49	3	2	2	2	2	2	2	2	2	2	2	2	2	2	1	#NULL!	1	1	45	3	2	2	2	2	2	2	2	2	2	2
1	1	2002-11-12	17	3	2	2	0	3	1	1	2	1	2	2	2	2	1	2	#NULL!	4	2	2	2	2	2	2	2	2	2	2	2	2	2	1	#NULL!	1	2	#NULL!	4	2	2	2	2	2	2	2	2	2	2
1	1	2002-07-31	17	3	2	1	1	5	1	2	2	2	2	1	2	2	1	1	41	5	2	2	2	2	2	2	2	2	2	2	2	2	2	1	#NULL!	1	1	39	5	2	2	2	2	2	2	2	2	2	2
1	3	2003-07-24	16	3	2	1	1	3	1	1	1	2	2	2	2	2	1	1	43	5	2	2	2	2	2	2	2	2	2	2	2	2	1	2	#NULL!	1	1	40	5	2	2	2	2	2	2	2	2	2	2
2	1	2003-04-09	16	3	2	2	0	3	1	1	2	1	2	2	2	2	1	1	45	2	2	2	2	2	2	2	2	2	2	2	2	2	2	1	#NULL!	1	1	45	2	2	2	2	2	2	2	2	2	2	2
2	1	2002-08-11	17	3	2	2	0	4	1	1	1	1	2	2	2	2	1	1	40	3	2	2	2	2	2	2	2	2	2	2	2	2	2	1	#NULL!	1	1	43	3	2	2	2	2	2	2	2	2	2	2
2	6	2003-08-22	16	3	2	2	0	4	1	1	2	1	2	2	2	2	1	2	#NULL!	3	2	2	2	2	2	2	2	2	2	2	2	2	2	1	#NULL!	1	2	#NULL!	1	2	2	2	2	2	2	2	2	2	2
2	6	2002-06-04	17	3	2	2	1	5	1	1	1	1	2	2	2	2	1	1	47	4	2	2	2	2	2	2	2	2	2	2	2	2	2	1	#NULL!	1	1	40	3	2	2	2	2	2	2	2	2	2	2
2	1	2002-12-30	16	3	2	2	0	1	1	2	2	2	2	1	2	2	2	#NULL!	#NULL!	#NULL!	#NULL!	#NULL!	#NULL!	#NULL!	#NULL!	#NULL!	#NULL!	#NULL!	#NULL!	#NULL!	#NULL!	#NULL!	#NULL!	#NULL!	12	1	1	46	3	2	2	2	2	2	2	2	2	2	1
1	1	2003-08-16	16	3	2	1	0	1	1	2	2	2	2	2	2	2	2	#NULL!	#NULL!	#NULL!	#NULL!	#NULL!	#NULL!	#NULL!	#NULL!	#NULL!	#NULL!	#NULL!	#NULL!	#NULL!	#NULL!	#NULL!	#NULL!	#NULL!	7	1	1	48	5	2	2	2	2	2	2	2	2	2	2
1	1	2007-03-25	12	2	2	1	1	3	1	2	2	2	2	2	1	2	1	1	53	5	2	2	1	2	2	2	2	2	2	2	2	2	2	2	#NULL!	1	1	48	3	2	2	2	2	2	2	2	2	2	2
1	1	2006-12-23	12	2	1	1	0	2	1	1	2	2	2	2	2	2	1	2	#NULL!	5	2	2	2	2	2	2	2	2	2	2	2	2	2	1	#NULL!	1	2	#NULL!	5	2	2	2	2	2	2	2	2	2	2
1	1	2007-05-18	12	2	2	2	1	4	1	1	2	1	2	2	2	2	1	2	#NULL!	4	2	2	2	2	2	2	2	2	2	2	2	2	2	1	#NULL!	1	2	#NULL!	4	2	2	2	2	2	2	2	2	2	2
2	1	2005-09-07	14	2	2	2	0	1	2	2	1	2	2	2	2	2	1	1	37	4	2	2	2	2	2	2	2	2	2	2	2	2	1	2	#NULL!	1	1	35	4	2	2	2	2	2	2	2	2	2	2
2	6	2006-10-21	13	2	2	2	1	6	1	1	1	1	2	2	2	2	1	1	37	3	2	2	2	2	2	2	2	2	2	2	2	2	2	1	#NULL!	1	1	33	3	2	2	2	2	2	2	2	2	2	2
2	5	2006-12-12	12	2	2	2	0	2	1	1	2	2	2	2	2	2	1	1	43	4	2	2	2	2	2	2	2	2	2	2	2	2	2	1	#NULL!	1	1	36	2	1	2	2	2	2	2	2	2	2	2
1	1	2007-04-24	12	2	2	2	1	4	1	1	1	1	2	2	2	2	1	1	42	4	2	2	2	2	2	2	2	2	2	2	2	2	2	1	#NULL!	1	1	43	4	2	2	2	2	2	2	2	2	2	2
1	1	2007-08-23	12	2	2	2	1	3	1	1	2	1	2	2	2	2	1	1	36	3	2	2	2	2	2	2	2	2	2	2	2	2	2	1	#NULL!	1	1	35	3	2	2	2	2	2	2	2	2	2	2
1	2	2006-11-05	13	2	2	2	0	8	1	1	2	1	2	1	1	2	1	1	37	4	2	2	2	2	2	2	2	2	2	2	2	2	2	1	#NULL!	1	1	32	3	2	2	2	2	2	2	2	2	2	2
1	3	2006-04-05	13	2	2	2	0	7	1	1	2	1	2	1	2	2	1	1	34	3	2	2	2	2	2	2	2	2	2	2	2	2	2	1	#NULL!	1	1	32	3	2	2	2	2	2	2	2	2	2	2
1	1	2006-12-15	12	2	2	2	0	4	2	2	2	2	1	1	2	2	1	2	#NULL!	3	2	2	2	2	2	2	2	2	2	2	2	2	2	1	#NULL!	1	2	#NULL!	2	2	2	2	2	2	2	2	2	2	2
1	1	2006-04-29	13	2	2	1	0	3	1	1	2	2	1	2	2	2	1	1	41	5	2	2	2	2	2	2	2	2	2	2	2	2	2	1	#NULL!	1	1	40	5	2	2	2	2	2	2	2	2	2	2
2	6	2006-08-04	13	2	2	2	0	3	1	1	2	1	2	2	2	2	1	2	#NULL!	3	2	2	2	2	2	2	2	2	2	2	2	2	2	1	#NULL!	1	2	#NULL!	2	2	2	2	2	2	2	2	2	2	2
2	6	2006-03-21	13	2	1	1	0	2	1	1	2	2	2	2	2	2	1	2	#NULL!	4	2	2	2	2	2	2	2	2	2	2	2	2	2	1	#NULL!	1	2	#NULL!	4	2	2	2	2	2	2	2	2	2	2
1	1	2006-03-06	13	2	2	1	1	2	1	1	2	2	2	2	2	2	1	1	43	5	2	2	2	2	2	2	2	2	2	2	2	2	1	2	#NULL!	1	1	40	5	2	2	2	2	2	2	2	2	2	2
1	1	2006-05-27	13	2	2	2	0	2	1	1	2	2	2	2	2	2	1	1	45	3	2	2	2	2	2	2	2	2	2	2	2	2	2	1	#NULL!	1	1	44	3	2	2	2	2	2	2	2	2	2	2
1	1	2005-07-28	14	2	2	2	1	9	1	1	1	1	1	1	2	2	1	2	#NULL!	4	2	2	2	2	2	2	2	2	2	2	2	2	2	1	#NULL!	1	2	#NULL!	4	2	2	2	2	2	2	2	2	2	2
2	1	2006-02-23	13	2	2	2	0	2	1	1	2	2	2	2	2	2	1	1	45	3	2	2	2	2	2	2	2	2	2	2	2	2	1	2	#NULL!	1	1	41	4	2	2	2	2	2	2	2	2	2	2
1	6	2007-02-22	12	2	2	1	0	2	1	1	2	2	2	2	2	2	1	1	34	5	2	2	2	2	2	2	2	2	2	2	2	2	2	1	#NULL!	1	1	33	5	2	2	2	1	2	2	2	2	2	2
2	1	2005-12-20	13	2	2	2	0	3	1	1	2	1	2	2	2	2	1	1	44	3	2	2	2	2	2	2	2	2	2	2	2	2	2	1	#NULL!	1	1	42	4	2	2	2	2	2	2	2	2	2	2
2	1	2005-05-15	14	2	1	2	0	5	1	1	1	1	2	2	2	2	1	1	37	3	2	2	2	2	2	2	2	2	2	2	2	2	2	1	#NULL!	1	1	36	3	2	2	2	2	2	2	2	2	2	2
1	3	2006-06-18	13	2	2	1	0	3	1	1	1	2	2	2	2	2	1	1	47	4	2	2	1	2	2	2	2	2	2	2	2	2	2	2	#NULL!	1	1	43	4	2	2	2	2	2	2	2	2	2	2
2	1	2006-01-12	13	2	2	1	0	2	1	1	2	2	2	2	2	2	1	1	41	4	2	2	2	2	2	2	2	2	2	2	2	2	2	1	#NULL!	1	1	36	3	2	2	2	2	2	2	2	2	2	2
2	1	2005-10-24	14	2	2	1	1	2	1	1	2	2	2	2	2	2	1	1	37	3	2	2	2	2	2	2	2	2	2	2	2	2	2	1	#NULL!	1	1	37	3	2	2	2	2	2	2	2	2	2	2
1	3	2005-09-27	14	2	2	1	0	2	1	1	2	2	2	2	2	2	1	2	#NULL!	5	2	2	2	1	2	2	2	2	2	2	2	2	2	2	#NULL!	2	#NULL!	#NULL!	#NULL!	#NULL!	#NULL!	#NULL!	#NULL!	#NULL!	#NULL!	#NULL!	#NULL!	#NULL!	#NULL!
2	1	2006-06-14	13	2	2	2	0	4	1	2	1	1	2	2	2	2	2	#NULL!	#NULL!	#NULL!	#NULL!	#NULL!	#NULL!	#NULL!	#NULL!	#NULL!	#NULL!	#NULL!	#NULL!	#NULL!	#NULL!	#NULL!	#NULL!	#NULL!	10	1	1	43	2	2	2	2	2	2	2	2	2	2	2
2	5	2007-12-14	11	2	2	1	2	4	1	1	1	2	2	2	2	2	1	1	38	5	2	2	2	2	2	2	2	2	2	2	2	2	2	1	#NULL!	1	1	36	5	2	2	2	2	2	2	2	2	2	2
2	1	2007-06-21	12	2	2	1	0	2	1	1	2	2	2	2	2	2	1	1	45	5	2	2	2	2	2	2	2	2	2	2	2	2	2	1	#NULL!	1	1	47	5	2	2	1	2	2	2	2	2	2	2
1	3	2006-12-01	13	2	1	1	0	2	1	1	2	2	2	2	2	2	1	1	42	5	2	2	2	2	2	2	2	2	2	2	2	2	1	2	#NULL!	1	1	43	5	2	2	2	2	2	2	2	2	2	2
1	5	2005-12-18	13	2	2	2	0	4	1	1	2	1	2	2	2	2	1	1	39	1	2	2	2	2	2	2	2	2	2	2	2	2	2	1	#NULL!	1	1	38	3	2	2	2	2	2	2	2	2	2	2
1	1	2005-12-20	13	2	2	1	1	2	1	1	2	2	2	2	2	2	1	1	39	4	2	2	2	2	2	2	2	1	2	2	2	2	2	2	#NULL!	1	1	39	4	2	2	2	2	2	2	2	2	2	2
1	1	2006-04-13	13	2	2	2	2	1	2	1	2	2	2	2	2	2	1	2	#NULL!	0	2	2	2	2	2	2	2	2	2	2	2	2	2	1	#NULL!	1	1	40	3	2	2	2	2	2	2	2	2	2	2
2	1	2005-05-25	14	2	2	2	1	6	1	2	1	1	2	2	2	2	1	1	53	4	2	2	2	2	2	2	2	2	2	2	2	2	2	1	#NULL!	1	1	39	3	2	2	2	2	2	2	2	2	2	2
2	3	2006-06-26	13	2	2	1	0	2	1	1	2	2	2	2	2	2	1	1	38	4	2	2	2	2	2	2	2	2	2	2	2	2	2	1	#NULL!	1	1	37	3	2	2	2	2	2	2	2	2	2	2
2	6	2002-09-18	17	3	2	1	0	7	1	1	2	2	2	2	2	2	1	1	50	5	2	2	1	2	2	2	2	2	2	2	2	2	1	2	#NULL!	1	1	45	4	2	2	2	2	2	2	2	2	2	2
1	3	2003-05-21	16	3	2	1	1	6	2	2	2	2	2	2	2	1	1	1	42	3	2	2	2	2	2	2	2	2	2	2	2	2	2	1	#NULL!	1	1	42	4	2	2	2	2	2	2	2	2	2	2
1	1	2003-10-02	16	3	2	1	0	2	1	1	2	2	2	2	2	2	1	1	40	4	2	2	1	2	2	2	2	2	2	2	1	2	2	2	#NULL!	1	1	41	5	2	2	2	2	2	2	2	2	2	2
2	1	2003-03-15	16	3	2	1	0	2	1	1	2	2	2	2	2	2	1	2	#NULL!	5	2	2	1	2	2	2	2	2	2	2	2	2	2	2	#NULL!	1	1	42	4	2	2	2	2	2	2	2	2	2	2
2	3	2003-05-14	16	3	2	1	0	2	1	1	2	2	2	2	2	2	1	1	52	5	2	2	2	2	2	2	2	2	2	2	2	2	1	2	#NULL!	1	1	43	4	2	2	1	2	2	2	2	2	2	2
1	3	2003-01-08	16	3	2	1	0	2	1	1	2	2	2	2	2	2	1	1	46	4	2	2	1	2	2	2	2	2	2	2	2	2	2	2	#NULL!	1	1	45	4	2	2	2	2	2	2	2	2	2	2
1	1	2003-08-11	16	3	2	1	0	2	1	1	2	2	2	2	2	2	1	1	42	5	2	2	2	2	2	2	2	2	2	2	2	2	2	1	#NULL!	1	1	38	5	2	2	2	2	2	2	2	2	2	2
1	6	2002-11-06	17	3	2	1	0	4	1	1	2	2	2	2	2	1	1	1	49	5	2	2	2	2	2	2	2	2	2	2	2	2	2	1	#NULL!	1	1	47	5	2	2	2	2	2	2	2	2	2	2
1	2	2002-12-17	16	3	2	1	1	2	1	1	2	2	2	2	2	2	1	1	47	5	2	2	2	2	2	2	2	2	2	2	2	2	2	1	#NULL!	1	1	39	4	2	2	2	2	2	2	2	2	2	2
2	1	2002-08-16	17	3	2	2	0	4	1	1	2	1	2	2	2	2	1	1	47	1	2	2	2	2	2	2	2	2	2	2	2	2	1	2	#NULL!	1	1	42	1	2	2	2	2	2	2	2	2	2	2
1	1	2003-03-02	16	3	2	2	0	3	1	1	2	1	2	2	2	2	1	1	36	2	2	2	2	2	2	2	2	2	2	2	2	2	2	1	#NULL!	1	1	37	4	2	2	2	2	2	2	2	2	2	2
2	1	2006-10-10	13	2	2	1	0	2	1	1	2	2	2	2	2	2	1	1	36	3	2	2	2	2	2	2	2	2	2	2	2	2	2	1	#NULL!	1	1	32	2	2	2	2	2	2	2	2	2	2	2
1	2	2005-10-07	14	2	2	2	0	3	1	1	2	1	2	2	2	2	1	1	39	2	2	2	2	2	2	2	2	2	2	2	2	2	2	1	#NULL!	1	2	#NULL!	2	2	2	2	2	2	2	2	2	2	2
2	1	2003-09-05	16	3	2	1	1	2	1	1	2	2	2	2	2	2	1	1	46	0	2	2	2	2	2	2	2	2	2	2	2	2	2	1	#NULL!	1	1	47	0	2	2	2	2	2	2	2	2	2	2
1	1	2003-01-23	16	3	2	2	0	3	1	1	2	1	2	2	2	2	1	2	#NULL!	3	2	2	2	2	2	2	2	2	2	2	2	2	1	2	#NULL!	1	2	#NULL!	2	2	2	2	2	2	2	2	2	2	2
1	3	2006-05-09	13	2	2	1	0	1	1	2	2	2	2	2	2	2	1	1	40	0	2	2	2	2	2	2	2	2	2	2	2	2	2	1	#NULL!	1	1	43	0	2	2	2	2	2	2	2	2	2	1
1	5	2005-10-24	14	2	2	1	0	2	1	1	2	2	2	2	2	2	1	1	43	5	2	2	2	2	2	2	2	2	2	2	2	2	2	1	#NULL!	1	1	41	5	2	2	2	2	2	2	2	2	2	2
1	1	2006-07-08	13	2	2	2	0	3	1	1	2	1	2	2	2	2	1	1	45	3	2	2	2	2	2	2	2	2	2	2	2	2	2	1	#NULL!	1	1	43	4	2	2	2	2	2	2	2	2	2	2
1	2	2006-01-21	13	2	1	1	0	3	2	2	1	2	2	2	1	2	1	1	46	5	2	2	2	2	2	2	2	2	2	2	2	2	2	1	#NULL!	1	1	44	5	2	2	2	2	2	2	2	2	2	2
2	6	2006-05-09	13	2	1	1	1	2	1	1	2	2	2	2	2	2	1	1	43	4	2	2	2	2	2	2	2	2	2	2	2	2	2	1	#NULL!	1	1	39	4	2	2	2	1	2	2	2	2	2	2
2	1	2006-08-07	13	2	2	2	0	5	1	1	1	1	2	2	2	2	1	1	42	4	2	2	2	2	2	2	2	2	2	2	2	2	2	1	#NULL!	1	1	38	4	2	2	2	2	2	2	2	2	2	2
1	1	2005-09-26	14	2	2	1	0	2	1	1	2	2	2	2	2	2	1	1	43	5	2	2	1	2	2	2	2	2	2	2	2	2	2	2	#NULL!	1	1	40	4	2	2	2	2	2	2	2	2	2	2
1	2	2005-09-26	14	2	2	1	1	2	1	2	1	2	2	2	2	2	2	#NULL!	#NULL!	#NULL!	#NULL!	#NULL!	#NULL!	#NULL!	#NULL!	#NULL!	#NULL!	#NULL!	#NULL!	#NULL!	#NULL!	#NULL!	#NULL!	#NULL!	12	1	1	42	4	2	2	2	2	2	2	2	2	2	2
1	1	2005-10-26	14	2	2	2	3	4	1	1	1	2	2	2	2	2	1	1	43	4	2	2	2	2	2	2	2	2	2	2	2	2	2	1	#NULL!	1	1	42	4	2	2	2	2	2	2	2	2	2	2
2	1	2007-04-19	12	2	2	2	0	4	1	2	1	2	2	2	2	2	1	1	41	4	2	2	2	2	2	2	2	2	2	2	2	2	2	1	#NULL!	1	1	39	4	2	2	2	2	2	2	2	2	2	2
1	5	2006-11-30	13	2	2	1	1	2	1	1	2	2	2	2	2	2	1	1	41	3	2	2	2	1	2	2	2	2	2	2	2	2	2	2	#NULL!	1	1	43	2	2	2	1	2	2	2	2	2	2	2
2	3	2006-11-02	13	2	2	1	0	2	1	1	2	2	2	2	2	2	1	1	44	4	2	2	2	2	2	2	2	2	2	2	2	2	2	1	#NULL!	1	1	38	0	2	2	2	2	2	2	2	2	2	2
2	3	2006-08-25	13	2	2	1	0	1	1	2	2	2	2	2	2	2	1	1	41	5	2	2	2	2	2	2	2	2	2	2	2	2	2	1	#NULL!	1	1	40	5	2	2	2	2	2	2	2	2	2	2
2	6	2006-06-26	13	2	2	1	0	2	1	1	2	2	2	2	2	2	1	2	#NULL!	4	2	2	2	2	2	2	2	2	2	2	2	2	2	1	#NULL!	1	2	#NULL!	4	2	2	2	2	2	2	2	2	2	2
2	1	2003-05-23	16	3	1	1	0	2	1	1	2	2	2	2	2	2	1	1	47	5	2	2	2	2	2	2	2	2	2	2	2	2	2	1	#NULL!	1	1	43	5	2	2	2	2	2	2	2	2	2	2
2	6	2003-09-18	16	3	2	1	2	7	2	2	2	2	2	2	2	1	1	1	50	4	2	2	2	2	2	2	2	2	2	2	2	2	2	1	#NULL!	1	1	38	3	2	2	2	2	2	2	2	2	2	2
1	6	2004-05-04	15	3	2	2	0	4	1	1	1	1	2	2	2	2	1	1	48	4	2	2	1	2	2	2	2	2	2	2	2	2	2	2	#NULL!	1	1	45	3	2	2	2	2	2	2	2	2	2	2
2	1	2002-11-08	17	3	2	1	0	4	1	1	1	2	2	2	2	2	1	1	45	5	2	2	2	2	2	2	2	2	2	2	2	2	2	1	#NULL!	1	1	47	5	2	2	2	2	2	2	2	2	2	2
1	5	2002-11-20	17	3	2	1	0	2	1	1	2	2	2	2	2	2	1	1	51	5	2	2	2	2	2	2	2	2	2	2	2	2	2	1	#NULL!	1	1	44	5	2	2	2	2	2	2	2	2	2	2
2	3	2003-06-12	16	3	2	1	2	4	1	1	1	2	2	2	2	2	1	1	46	3	2	2	2	2	2	2	2	2	2	2	2	2	2	1	#NULL!	1	1	44	4	2	2	2	2	2	2	2	2	2	2
2	3	2002-07-27	17	3	2	2	0	5	1	1	1	1	2	2	2	2	1	1	41	3	2	2	2	2	2	2	2	2	2	2	2	2	1	2	#NULL!	1	1	42	2	2	2	2	2	2	2	2	2	2	2
2	1	2002-09-08	17	3	2	2	0	8	1	1	1	1	2	2	2	2	1	1	45	3	2	2	2	2	2	2	2	2	2	2	2	2	2	1	#NULL!	1	1	43	1	2	2	2	2	2	2	2	2	2	2
2	1	2006-03-05	13	2	2	2	0	3	1	1	2	1	2	2	2	2	1	1	46	5	2	2	1	2	2	2	2	2	2	2	2	2	2	2	#NULL!	1	1	40	3	2	2	2	2	2	2	2	2	2	2
2	1	2006-02-28	13	2	2	1	0	2	1	1	2	2	2	2	2	2	1	1	43	4	2	2	2	2	2	2	2	2	2	2	2	2	2	1	#NULL!	1	1	45	5	2	2	2	2	2	2	2	2	2	2
2	1	2007-08-10	12	2	2	2	1	3	1	1	2	1	2	2	2	2	1	1	49	5	2	2	2	2	2	2	2	2	2	2	2	2	2	1	#NULL!	2	#NULL!	#NULL!	#NULL!	#NULL!	#NULL!	#NULL!	#NULL!	#NULL!	#NULL!	#NULL!	#NULL!	#NULL!	#NULL!
2	1	2003-10-04	16	3	2	2	2	2	1	1	2	2	2	2	2	2	1	2	#NULL!	4	2	2	2	2	1	2	2	2	2	2	2	2	1	2	#NULL!	1	2	#NULL!	3	2	2	2	2	2	2	2	2	2	2
2	1	2003-02-19	16	3	2	1	0	2	1	1	2	2	2	2	2	2	1	2	#NULL!	5	2	2	2	2	2	2	2	2	2	2	2	2	2	1	#NULL!	1	2	#NULL!	5	2	2	2	2	2	2	2	2	2	2
1	1	2003-06-03	16	3	2	1	0	2	1	1	2	2	2	2	2	2	1	1	53	1	2	2	2	2	2	2	2	2	2	2	2	2	2	1	#NULL!	1	1	49	5	2	2	1	2	2	2	2	2	2	1
1	1	2002-09-30	17	3	2	2	0	3	1	1	2	1	2	2	2	2	1	1	42	2	2	2	2	2	2	2	2	2	2	2	2	2	2	1	#NULL!	1	1	41	3	2	2	2	2	2	2	2	2	2	2
2	1	2003-04-10	16	3	2	2	0	2	1	1	2	2	2	2	2	2	1	1	54	2	2	2	2	1	2	2	2	2	2	2	2	2	2	2	#NULL!	1	1	48	3	2	2	2	2	2	2	2	2	2	2
1	1	2003-07-04	16	3	2	2	0	6	1	1	1	1	2	2	2	2	1	1	44	4	2	2	2	2	2	2	2	2	2	2	2	2	2	1	#NULL!	1	1	40	4	2	2	2	2	2	2	2	2	2	2
1	1	2003-04-27	16	3	2	1	0	3	1	1	1	2	2	2	2	2	1	1	43	5	2	2	2	2	2	2	2	2	2	2	2	2	2	1	#NULL!	1	1	40	4	2	2	2	2	2	2	2	2	2	2
2	6	2003-01-12	16	3	1	1	0	1	1	2	2	2	2	2	2	2	1	1	50	5	2	2	2	2	2	2	2	2	2	2	2	2	2	1	#NULL!	1	1	44	4	2	2	2	2	2	2	2	2	2	2
1	5	2003-06-23	16	3	2	2	0	3	1	2	2	1	2	2	2	2	1	1	40	3	2	2	2	2	2	2	2	2	2	2	2	2	2	1	#NULL!	1	1	38	3	2	2	2	2	2	2	2	2	2	2
2	3	2003-08-09	16	3	2	1	1	3	1	1	1	2	2	2	2	2	1	1	49	5	2	2	2	2	2	2	2	1	2	2	2	2	2	2	#NULL!	1	1	42	5	2	2	2	2	2	2	2	2	2	2
2	1	2003-05-30	16	3	2	2	0	5	1	1	1	1	2	2	2	2	1	1	40	4	2	2	2	2	2	2	2	2	2	2	2	2	2	1	#NULL!	1	1	41	5	2	2	1	2	2	2	2	2	2	2
1	6	2003-01-29	16	3	2	1	0	6	1	1	2	2	1	1	2	2	1	1	47	5	2	2	2	2	2	2	2	2	2	2	2	2	2	1	#NULL!	1	1	46	4	2	2	2	2	2	2	2	2	2	2
2	1	2002-11-28	17	3	2	1	0	1	1	2	2	2	2	2	2	2	1	1	46	3	2	2	2	2	2	2	2	2	2	2	2	2	1	2	#NULL!	1	1	43	4	2	2	2	2	2	2	2	2	2	2
2	6	2002-12-13	16	3	2	1	0	4	1	1	1	2	2	2	2	2	1	1	45	5	2	2	2	2	2	2	2	2	2	2	2	2	2	1	#NULL!	1	1	43	5	2	2	2	2	2	2	2	2	2	2
1	3	2003-09-12	16	3	2	1	1	1	1	2	2	2	2	2	2	2	1	1	41	5	2	2	2	2	2	2	2	2	2	2	2	2	2	1	#NULL!	1	1	41	5	2	2	2	2	2	2	2	2	2	2
2	6	2003-08-04	16	3	2	2	1	4	1	1	1	1	2	2	2	2	1	1	39	3	2	2	2	2	2	2	2	2	2	2	2	2	1	2	#NULL!	1	1	37	2	2	2	2	2	2	2	2	2	2	2
1	2	2002-02-13	17	3	2	2	0	3	1	1	2	1	2	2	2	2	1	2	#NULL!	3	2	2	2	2	2	2	2	2	2	2	2	2	2	1	#NULL!	1	1	47	2	2	2	2	2	2	2	2	2	2	2
1	6	2002-11-09	17	3	2	1	0	2	1	1	2	2	2	2	2	2	1	1	44	5	2	2	2	2	2	2	2	2	2	2	2	2	2	1	#NULL!	1	1	46	5	2	2	2	2	2	2	2	2	2	2
1	3	2003-01-10	16	3	2	2	0	3	1	1	2	1	2	2	2	2	1	1	45	3	2	2	2	2	2	2	2	2	2	2	2	2	2	1	#NULL!	1	1	40	2	2	2	2	2	2	2	2	2	2	2
2	3	2002-12-20	16	3	2	1	0	10	1	1	1	2	1	1	2	2	1	1	47	4	2	2	2	1	2	2	2	2	2	1	2	2	2	2	#NULL!	1	1	42	4	2	2	2	2	2	2	2	2	2	1
1	1	2002-08-07	17	3	2	1	0	2	1	1	2	2	2	2	2	2	1	2	#NULL!	4	2	2	2	2	2	2	2	2	2	2	2	2	2	1	#NULL!	1	2	#NULL!	4	2	2	2	2	2	2	2	2	2	2
1	1	2002-09-18	17	3	2	1	0	4	1	1	1	2	2	2	2	2	1	1	45	5	2	2	2	2	2	2	2	2	2	2	2	2	2	1	#NULL!	1	1	43	5	2	2	2	2	2	2	2	2	2	2
1	6	2002-12-03	16	3	2	1	0	2	1	1	2	2	2	2	2	2	1	2	#NULL!	4	2	2	2	2	2	2	2	2	2	2	2	2	2	1	#NULL!	1	2	#NULL!	5	2	2	2	2	2	2	2	2	2	2
1	3	2002-10-19	17	3	2	2	1	4	1	1	1	1	2	2	2	2	1	1	42	5	2	2	2	2	2	2	2	2	2	2	2	2	2	1	#NULL!	1	2	#NULL!	5	2	2	2	2	2	2	2	2	2	2
1	1	2002-08-28	17	3	2	2	0	3	1	1	1	2	2	2	2	2	1	2	#NULL!	3	2	2	2	2	2	2	2	2	2	2	2	2	2	1	#NULL!	1	2	#NULL!	3	2	2	2	2	2	2	2	2	2	2
1	1	2002-11-19	17	3	2	2	0	3	1	1	2	1	2	2	2	2	1	1	49	3	2	2	2	2	2	2	2	2	2	2	2	2	2	1	#NULL!	1	1	48	2	2	2	2	2	2	2	2	2	2	2
1	4	2003-12-22	15	3	2	1	0	4	1	1	1	2	2	2	2	2	1	1	46	4	2	2	2	2	2	2	2	2	2	2	2	2	2	1	#NULL!	1	1	39	5	2	2	2	2	2	2	2	2	2	2
1	1	2003-04-06	16	3	2	1	0	4	1	1	1	2	2	2	2	2	1	1	45	5	2	2	2	2	2	2	2	2	2	2	2	2	2	1	#NULL!	1	1	37	5	2	2	2	2	2	2	2	2	2	2
1	1	2002-12-10	16	3	2	1	0	3	1	1	1	2	2	2	2	2	1	1	42	4	2	2	2	2	2	2	2	2	2	2	2	2	2	1	#NULL!	1	1	39	3	2	2	2	2	2	2	2	2	2	2
2	1	2003-02-11	16	3	1	2	0	3	1	2	2	1	2	2	2	2	1	2	#NULL!	3	2	2	2	2	2	2	2	2	2	2	2	2	2	1	#NULL!	1	1	51	3	2	2	2	2	2	2	2	2	2	2
2	6	2003-10-19	16	3	2	1	1	2	1	1	2	2	2	2	2	2	1	2	#NULL!	5	2	2	2	2	2	2	2	2	2	2	2	2	2	1	#NULL!	1	2	#NULL!	4	2	2	2	2	2	2	2	2	2	2
2	1	2003-08-19	16	3	2	1	2	5	1	1	1	2	2	2	2	2	1	1	42	4	2	2	2	2	2	2	2	2	2	2	2	2	2	1	#NULL!	1	1	38	4	2	2	2	2	2	2	2	2	2	2
1	1	2003-06-11	16	3	2	2	1	2	1	2	2	1	2	2	2	2	2	#NULL!	#NULL!	#NULL!	#NULL!	#NULL!	#NULL!	#NULL!	#NULL!	#NULL!	#NULL!	#NULL!	#NULL!	#NULL!	#NULL!	#NULL!	#NULL!	#NULL!	5	1	1	37	2	2	2	2	2	2	2	2	2	2	2
1	6	2004-03-02	15	3	2	1	2	3	2	2	2	2	1	1	2	2	1	2	#NULL!	3	2	2	2	2	2	2	2	2	2	1	2	2	1	2	#NULL!	1	2	#NULL!	3	2	2	2	2	2	2	2	2	2	1
2	1	2003-08-12	16	3	2	1	0	2	1	1	2	2	2	2	2	2	1	1	41	4	2	2	2	2	2	2	2	2	2	2	2	2	1	2	#NULL!	1	1	40	4	2	2	2	2	2	2	2	2	2	2
2	2	2002-11-07	17	3	2	1	0	4	1	1	1	2	2	2	2	2	1	1	44	4	2	2	2	2	2	2	2	2	2	2	2	2	2	1	#NULL!	1	1	40	4	2	2	1	2	2	2	2	2	2	2
2	1	2003-08-15	16	3	2	1	1	2	1	1	2	2	2	2	2	2	1	1	55	4	2	2	2	2	2	1	2	2	2	2	2	2	2	2	#NULL!	1	1	40	4	2	2	2	2	2	2	2	2	2	2
1	1	2003-05-29	16	3	2	2	0	4	1	1	1	1	2	2	2	2	1	2	#NULL!	3	2	2	2	2	2	2	2	2	2	2	2	2	2	1	#NULL!	1	2	#NULL!	2	2	2	2	2	2	2	2	2	2	2
2	1	2003-12-30	15	3	2	2	2	4	1	2	2	1	2	2	2	2	1	1	45	4	2	2	2	2	2	2	2	2	2	2	2	2	2	1	#NULL!	1	1	40	1	2	2	2	2	2	2	2	2	2	2
2	1	2003-07-31	16	3	2	2	0	1	1	2	2	2	2	2	2	2	2	#NULL!	#NULL!	#NULL!	#NULL!	#NULL!	#NULL!	#NULL!	#NULL!	#NULL!	#NULL!	#NULL!	#NULL!	#NULL!	#NULL!	#NULL!	#NULL!	#NULL!	15	1	1	40	4	2	2	2	2	2	2	2	2	2	2
2	3	2002-08-26	17	3	2	1	0	3	1	1	1	2	2	2	2	2	1	1	47	4	2	2	2	2	2	2	2	2	2	2	2	2	1	2	#NULL!	1	1	46	4	2	2	2	2	2	2	2	2	2	2
1	1	2003-05-01	16	3	2	2	0	3	1	1	2	1	2	2	2	2	1	1	44	3	2	2	2	2	2	2	2	2	2	2	2	2	2	1	#NULL!	1	1	45	4	2	2	2	2	2	2	2	2	2	2
1	6	2002-10-21	17	3	2	1	0	4	1	1	1	2	2	2	2	2	1	1	47	4	2	2	2	2	2	2	2	2	2	2	2	2	2	1	#NULL!	1	1	42	4	2	2	2	2	2	2	2	2	2	2
2	1	2003-04-01	16	3	2	1	0	2	1	1	2	2	2	2	2	2	1	1	41	5	2	2	1	2	2	2	2	2	2	2	2	2	2	2	#NULL!	1	1	42	5	2	2	2	2	2	2	2	2	2	2
1	2	2002-05-26	17	3	2	1	0	2	1	1	2	2	2	2	2	2	1	1	45	4	2	2	2	2	2	2	2	2	2	2	2	2	2	1	#NULL!	1	1	44	4	2	2	2	2	2	2	2	2	2	2
2	1	2003-06-14	16	3	2	1	0	2	1	1	2	2	2	2	2	2	1	2	#NULL!	2	2	2	2	2	2	2	2	2	2	2	2	2	2	1	#NULL!	1	2	#NULL!	3	2	2	2	2	2	2	2	2	2	2
1	1	2003-01-30	16	3	2	2	0	3	1	1	2	1	2	2	2	2	1	1	42	3	2	2	2	2	2	2	2	2	2	2	2	2	2	1	#NULL!	1	1	38	3	2	2	2	2	2	2	2	2	2	2
2	1	2003-08-24	16	3	2	2	0	4	1	1	1	1	2	2	2	2	1	1	41	3	2	2	2	2	2	2	2	2	2	2	2	2	2	1	#NULL!	1	1	39	3	2	2	2	2	2	2	2	2	2	2
1	2	2003-03-18	16	3	2	1	0	4	1	1	1	2	2	2	2	2	1	1	45	5	2	2	2	2	2	2	2	2	2	2	2	2	2	1	#NULL!	1	1	46	4	2	2	2	2	2	2	2	2	2	2
2	3	2003-01-26	16	3	2	1	0	1	1	2	2	2	2	2	2	2	1	1	44	4	2	2	2	2	2	2	2	2	2	2	2	2	2	1	#NULL!	1	1	42	4	2	2	2	2	2	2	2	2	2	2
2	6	2003-02-14	16	3	2	1	0	2	1	1	2	2	2	2	2	2	1	1	43	4	2	2	2	2	2	2	2	2	2	2	2	2	2	1	#NULL!	1	1	41	4	2	2	2	2	2	2	2	2	2	2
2	3	2003-12-19	15	3	2	2	0	2	1	2	2	1	2	2	2	2	1	1	39	2	2	2	2	2	2	2	2	2	2	2	2	2	2	1	#NULL!	1	1	43	3	2	2	2	2	2	2	2	2	2	2
2	1	2002-11-03	17	3	2	1	0	3	1	2	1	2	2	2	2	2	1	1	47	4	2	2	2	2	2	2	2	2	2	2	2	2	2	1	#NULL!	1	1	46	4	2	2	2	2	2	2	2	2	2	2
2	3	2003-02-14	16	3	2	1	1	2	1	1	2	2	2	2	2	2	1	1	45	5	2	2	2	2	2	2	2	2	2	2	2	2	2	1	#NULL!	1	1	43	4	2	2	2	2	2	2	2	2	2	2
2	1	2003-03-16	16	3	2	1	1	3	1	1	1	2	2	2	2	2	1	1	47	4	2	2	2	2	2	2	2	2	2	2	2	2	2	1	#NULL!	1	1	40	4	2	2	2	2	2	2	2	2	2	2
1	1	2002-07-30	17	3	2	1	0	2	1	1	2	2	2	2	2	2	1	1	46	2	2	2	2	1	2	2	2	2	2	2	2	2	2	2	#NULL!	1	1	41	5	2	2	2	2	2	2	2	2	2	2
1	1	2003-05-27	16	3	2	1	0	5	1	1	1	2	2	2	2	2	1	1	40	2	2	2	2	2	2	2	2	2	2	2	2	2	2	1	#NULL!	1	1	37	3	2	2	2	2	2	2	2	2	2	2
1	1	2003-01-14	16	3	2	2	2	3	1	1	2	1	2	2	2	2	1	1	35	3	2	2	2	2	2	2	2	2	2	2	2	2	1	2	#NULL!	1	1	34	3	2	2	2	2	2	2	2	2	2	2
1	6	2002-10-26	17	3	2	1	0	3	1	1	2	2	1	2	2	2	1	1	47	3	2	2	2	2	2	2	2	2	2	2	2	2	2	1	#NULL!	1	1	41	4	2	2	2	2	2	2	2	2	2	2
1	6	2002-11-18	17	3	2	1	0	4	1	1	1	2	2	2	2	2	1	1	40	3	2	2	2	2	2	2	2	2	2	2	2	2	2	1	#NULL!	1	1	45	3	2	2	2	2	2	2	2	2	2	2
1	1	2002-11-22	17	3	2	1	1	3	1	1	1	2	2	2	2	2	1	1	48	4	2	2	1	2	2	2	2	2	2	2	2	2	2	2	#NULL!	1	1	46	4	2	2	2	2	2	2	2	2	2	2
2	1	2002-11-16	17	3	2	2	1	5	1	1	1	1	2	2	2	2	1	1	44	4	2	2	2	2	2	2	2	2	2	2	2	2	2	1	#NULL!	1	1	45	3	2	2	2	2	2	2	2	2	2	2
2	5	2002-06-05	17	3	2	2	1	3	1	1	2	1	2	2	2	2	1	2	#NULL!	4	2	2	2	2	2	2	2	2	2	2	2	2	1	2	#NULL!	1	2	#NULL!	2	2	2	2	2	2	2	2	2	2	2
1	1	2003-02-08	16	3	2	1	0	2	1	1	2	2	2	2	2	2	1	1	48	5	2	2	2	2	2	2	2	2	2	2	2	2	2	1	#NULL!	1	1	42	5	2	2	2	2	2	2	2	2	2	2
1	6	2002-09-18	17	3	2	1	0	2	1	1	2	2	2	2	2	2	1	1	46	5	2	2	2	2	2	2	2	2	2	2	2	2	2	1	#NULL!	1	1	43	4	2	2	2	2	2	2	2	2	2	2
1	6	2003-09-18	16	3	2	1	0	4	1	1	2	2	2	2	2	1	1	1	47	5	2	2	2	2	2	2	2	2	2	2	2	2	2	1	#NULL!	1	1	44	5	2	2	2	2	2	2	2	2	2	2
2	1	2003-01-02	16	3	2	2	0	4	1	1	1	1	2	2	2	2	1	1	46	5	2	2	2	2	2	2	2	2	2	2	2	2	2	1	#NULL!	1	1	43	5	2	2	2	2	2	2	2	2	2	2
2	3	2003-07-25	16	3	2	1	0	2	1	1	1	2	2	2	2	2	1	1	47	2	2	2	2	2	2	2	2	2	2	2	2	2	2	1	#NULL!	1	1	45	5	2	2	2	2	2	2	2	2	2	2
2	6	2003-02-12	16	3	2	2	0	7	2	2	1	1	2	2	2	2	1	1	39	1	2	2	2	2	2	2	2	2	2	2	2	2	1	2	#NULL!	1	1	37	1	2	2	2	2	2	2	2	2	2	2
1	6	2003-03-22	16	3	2	1	0	2	1	1	2	2	2	2	2	2	1	2	#NULL!	4	2	2	2	1	2	2	2	2	2	2	2	2	2	2	#NULL!	1	2	#NULL!	4	2	2	2	2	2	2	2	2	2	2
1	1	2002-12-20	16	3	2	2	0	3	1	1	2	1	2	2	2	2	1	1	48	2	2	2	2	2	2	2	2	2	2	2	2	2	2	1	#NULL!	1	1	44	2	2	2	2	2	2	2	2	2	2	2
1	6	2002-10-06	17	3	2	1	0	4	1	1	1	2	2	2	2	2	1	1	48	5	2	2	2	2	2	2	2	2	2	2	2	2	2	1	#NULL!	1	1	41	5	2	2	2	2	2	2	2	2	2	2
2	1	2003-05-06	16	3	2	2	0	2	2	2	2	2	2	2	2	1	1	2	#NULL!	3	2	2	2	2	2	2	2	2	2	2	2	2	2	1	#NULL!	1	1	43	2	2	2	2	2	2	2	2	2	2	2
2	1	2006-01-20	13	2	2	2	0	3	1	1	2	1	2	2	2	2	1	1	37	3	2	2	2	2	2	2	2	2	2	2	2	2	2	1	#NULL!	1	1	32	2	2	2	2	2	2	2	2	2	2	2
2	1	2006-06-19	13	2	2	2	0	4	1	1	1	1	2	2	2	2	1	2	#NULL!	3	2	2	2	2	2	2	2	2	2	2	2	2	1	2	#NULL!	1	1	35	2	2	2	2	2	2	2	2	2	2	2
2	6	2003-08-22	16	3	1	1	0	3	1	1	2	2	2	2	2	1	1	2	#NULL!	0	2	2	1	1	2	2	2	2	2	2	2	2	2	2	#NULL!	1	2	#NULL!	3	2	2	2	2	2	2	2	2	2	2
2	1	2002-11-15	17	3	1	2	0	3	1	1	2	1	2	2	2	2	1	1	40	3	2	2	1	2	2	2	2	2	2	2	2	2	1	2	#NULL!	1	1	41	2	2	2	2	2	2	2	2	1	2	2
1	6	2002-08-18	17	3	2	2	1	4	1	1	1	1	2	2	2	2	1	1	49	3	2	2	2	2	2	2	2	2	2	2	2	2	2	1	#NULL!	1	1	39	2	2	2	2	2	2	2	2	2	2	2
2	1	2005-01-02	14	2	2	2	0	5	1	1	1	1	2	2	2	2	1	1	43	2	2	2	2	2	2	2	2	2	2	2	2	2	2	1	#NULL!	1	1	38	2	2	2	2	2	2	2	2	2	2	2
1	1	2004-09-16	15	2	2	2	0	3	1	1	2	1	2	2	2	2	1	1	40	2	2	2	2	1	2	2	2	2	2	2	2	2	2	2	#NULL!	1	1	38	1	2	2	2	2	2	2	2	2	2	2
2	1	2003-12-16	15	3	2	2	0	3	1	1	1	2	2	2	2	2	1	1	53	2	2	2	2	2	2	2	2	2	2	2	2	2	1	2	#NULL!	1	1	52	3	2	2	1	2	2	2	2	2	2	2
2	1	2005-03-20	14	2	1	2	0	6	1	1	1	1	2	2	2	2	1	1	37	2	2	2	2	2	2	2	2	2	2	2	2	2	2	1	#NULL!	1	1	36	3	2	2	2	2	2	2	2	2	2	2
2	1	2002-11-06	17	3	2	2	0	5	1	1	1	1	2	2	2	2	1	1	43	2	2	2	2	2	2	2	2	2	2	2	2	2	2	1	#NULL!	1	1	37	2	2	2	2	2	2	2	2	2	2	2
2	1	2002-01-03	17	3	2	2	0	4	1	1	1	1	2	2	2	2	1	2	#NULL!	0	2	2	2	2	2	2	2	2	2	2	2	2	2	1	#NULL!	1	2	#NULL!	0	2	2	2	2	2	2	2	2	2	2
2	1	2005-09-28	14	2	2	2	0	4	1	1	2	1	2	2	2	1	1	1	37	2	2	2	2	2	2	2	2	2	2	2	2	2	2	1	#NULL!	1	1	37	3	2	2	2	2	2	2	2	2	2	2
2	1	2007-01-30	12	2	2	2	0	3	1	1	2	1	2	2	2	2	1	2	#NULL!	3	2	2	2	1	2	2	2	2	2	2	2	2	2	2	#NULL!	1	2	#NULL!	2	2	2	2	2	2	2	2	2	2	2
2	1	2005-03-04	14	2	2	2	0	3	1	1	2	1	2	2	2	2	1	1	43	3	2	2	2	2	2	2	2	2	2	2	2	2	2	1	#NULL!	1	1	41	2	2	2	2	2	2	2	2	2	2	2
2	1	2005-05-08	14	2	2	2	0	2	1	1	2	2	2	2	2	2	1	1	45	3	2	2	2	2	2	2	2	2	2	2	2	2	1	2	#NULL!	1	1	50	4	2	2	2	2	2	2	2	2	2	2
1	6	2006-08-19	13	2	2	2	0	4	1	1	2	1	2	2	2	2	1	2	#NULL!	3	2	2	2	2	2	2	2	2	2	2	2	2	2	1	#NULL!	1	2	#NULL!	4	2	2	2	2	2	2	2	2	2	2
2	3	2003-11-04	16	3	2	2	1	2	2	1	2	1	2	2	2	2	1	1	52	3	2	2	2	2	2	2	2	2	2	1	2	2	1	2	#NULL!	1	2	#NULL!	4	2	2	2	2	2	2	2	2	2	2
1	1	2006-06-18	13	2	2	2	1	5	1	1	2	1	2	2	2	1	1	1	42	3	2	2	2	2	2	2	2	2	2	2	2	2	2	1	#NULL!	1	1	40	1	2	2	2	2	2	2	2	2	2	2
2	1	2004-11-01	15	3	2	1	0	3	2	2	2	2	1	2	2	1	1	1	40	3	2	2	2	2	2	2	2	2	2	2	2	2	2	1	#NULL!	1	1	36	3	2	2	2	2	2	2	2	2	2	2
1	1	2004-04-11	15	3	2	2	1	1	2	2	2	1	2	2	2	2	1	1	47	1	2	2	2	2	2	2	2	2	2	2	2	2	2	1	#NULL!	1	1	38	4	2	2	2	2	2	2	2	2	2	2
1	1	2004-11-03	15	3	2	1	0	2	1	1	2	2	2	2	2	2	1	1	41	3	2	2	2	2	2	2	2	2	2	2	2	2	2	1	#NULL!	1	1	37	3	2	2	2	2	2	2	2	2	2	2
1	1	2003-10-10	16	3	2	2	0	2	1	1	2	2	2	2	2	2	1	1	49	4	2	2	2	2	2	2	2	2	2	2	2	2	2	1	#NULL!	1	1	45	4	2	2	2	2	2	2	2	2	2	2
1	3	2004-02-23	15	3	2	2	1	3	1	1	2	1	2	2	2	2	1	1	39	3	2	2	2	2	2	2	2	2	2	2	2	2	2	1	#NULL!	1	1	41	2	2	2	2	2	2	2	2	2	2	2
2	1	2006-10-23	13	2	2	1	2	3	1	2	1	2	2	2	2	2	1	1	38	3	2	2	2	2	2	2	2	2	2	2	2	2	2	1	#NULL!	1	1	32	3	2	2	2	2	2	2	2	2	2	2
2	1	2007-06-27	12	2	2	2	2	3	1	1	2	1	2	2	2	2	1	1	34	3	2	2	2	2	2	2	2	2	2	2	2	2	2	1	#NULL!	1	1	32	3	2	2	2	2	2	2	2	2	2	2
1	1	2003-03-30	16	3	2	1	0	2	1	1	2	2	2	2	2	2	1	1	49	3	2	2	2	2	2	2	2	2	2	2	2	2	2	1	#NULL!	1	1	41	4	2	2	2	2	2	2	2	2	2	2
2	1	2006-03-15	13	2	2	2	2	4	1	1	2	1	2	2	2	2	1	1	41	1	2	2	2	2	2	2	2	2	2	2	2	2	2	1	#NULL!	1	1	31	1	2	2	2	2	2	2	2	2	2	2
2	3	2006-10-04	13	2	2	2	0	3	1	1	2	1	2	2	2	2	1	1	36	1	2	2	2	2	2	2	2	2	2	2	2	2	2	1	#NULL!	1	1	34	2	2	2	2	2	2	2	2	2	2	2
1	6	2002-12-19	16	3	2	1	0	4	1	1	1	2	2	2	2	2	1	2	#NULL!	4	2	2	2	2	2	2	2	2	2	2	2	2	2	1	#NULL!	1	1	43	4	2	2	2	2	2	2	2	2	2	2
2	1	2005-08-02	14	2	2	2	0	4	1	1	1	1	2	2	2	2	1	2	#NULL!	0	2	2	2	2	2	2	2	2	2	2	2	2	1	2	#NULL!	1	2	#NULL!	3	2	2	2	2	2	2	2	2	2	2
2	1	2005-12-04	13	2	2	1	0	2	1	1	2	2	2	2	2	2	1	1	51	3	2	2	2	2	2	2	2	2	2	2	2	2	2	1	#NULL!	1	1	50	4	2	2	2	2	2	2	2	2	2	2
1	1	2003-06-26	16	3	2	2	1	3	1	1	2	1	2	2	2	2	1	1	38	3	2	2	2	2	2	2	2	2	2	2	2	2	2	1	#NULL!	1	1	36	2	2	2	2	2	2	2	2	2	2	2
1	1	2002-03-25	17	3	1	1	1	3	1	1	2	2	2	2	2	1	1	2	#NULL!	4	2	2	1	1	2	2	2	2	2	2	2	2	1	2	#NULL!	1	2	#NULL!	4	2	2	2	2	2	2	2	2	2	2
1	1	2002-04-05	17	3	2	2	0	3	1	1	2	1	2	2	2	2	1	1	48	3	2	2	2	2	2	2	2	2	2	2	2	2	2	1	#NULL!	1	1	48	4	2	2	2	2	2	2	2	2	2	2
2	1	2002-04-24	17	3	2	2	0	3	1	1	2	1	2	2	2	2	1	1	52	1	2	2	2	2	2	2	2	2	2	2	2	2	2	1	#NULL!	1	1	53	1	2	2	2	2	2	2	2	2	2	2
2	1	2004-04-17	15	2	2	2	0	5	1	1	1	1	2	2	2	2	1	2	#NULL!	2	2	2	2	2	2	2	2	2	2	2	2	2	2	1	#NULL!	2	#NULL!	#NULL!	#NULL!	#NULL!	#NULL!	#NULL!	#NULL!	#NULL!	#NULL!	#NULL!	#NULL!	#NULL!	#NULL!
1	6	2005-10-02	14	2	2	2	2	5	1	1	1	1	2	2	2	2	1	1	43	4	2	2	2	2	2	2	2	2	2	2	2	2	2	1	#NULL!	1	1	41	4	2	2	2	2	2	2	2	2	2	2
2	1	2007-10-21	12	2	2	1	0	2	1	2	2	2	2	2	2	1	1	2	#NULL!	0	2	2	2	2	2	2	2	2	2	2	2	2	2	1	#NULL!	1	1	35	3	2	2	2	2	2	2	2	2	2	2
2	1	2004-03-11	15	3	2	2	0	4	1	1	1	2	2	1	2	2	1	1	43	2	2	2	2	2	2	2	2	2	2	2	2	2	2	1	#NULL!	1	1	42	1	2	2	2	2	2	2	2	1	2	2
2	6	2004-02-08	15	3	2	2	0	3	1	1	2	1	2	2	2	2	1	1	45	3	2	2	2	2	2	2	2	2	2	2	2	2	1	2	#NULL!	1	1	43	2	2	2	2	2	2	2	2	2	2	2
1	3	2004-05-18	15	3	2	2	2	3	1	2	2	1	2	2	2	2	1	1	38	2	2	2	2	2	2	2	2	2	2	2	2	2	2	1	#NULL!	1	1	37	2	2	2	2	2	2	2	2	2	2	2
1	6	2003-03-07	16	3	1	1	1	2	1	1	2	2	2	2	2	2	1	1	45	4	2	2	2	2	2	2	2	2	2	2	2	2	2	1	#NULL!	1	1	45	3	2	2	2	2	2	2	2	2	2	2
2	3	2003-07-12	16	3	2	2	0	4	1	1	1	2	2	2	2	2	1	1	47	3	2	2	2	2	2	2	2	2	2	1	2	2	2	2	#NULL!	1	1	45	2	2	2	1	2	2	2	2	2	2	2
1	1	2004-03-08	15	3	1	1	0	1	1	2	2	2	2	2	2	2	2	#NULL!	#NULL!	#NULL!	#NULL!	#NULL!	#NULL!	#NULL!	#NULL!	#NULL!	#NULL!	#NULL!	#NULL!	#NULL!	#NULL!	#NULL!	#NULL!	#NULL!	9	1	1	42	2	2	2	2	2	2	2	2	2	2	2
2	6	2006-08-24	13	2	2	2	0	3	1	1	2	1	2	2	2	2	2	#NULL!	#NULL!	#NULL!	#NULL!	#NULL!	#NULL!	#NULL!	#NULL!	#NULL!	#NULL!	#NULL!	#NULL!	#NULL!	#NULL!	#NULL!	#NULL!	#NULL!	#NULL!	1	2	#NULL!	3	2	2	2	2	2	2	2	2	2	2
1	1	2004-02-18	15	2	2	2	0	3	1	1	2	1	2	2	2	2	1	1	42	2	2	2	2	2	2	2	2	2	1	1	2	2	2	2	#NULL!	1	1	40	1	2	2	2	2	2	2	2	2	2	2
1	1	2002-02-06	17	3	2	2	0	3	1	1	2	1	2	2	2	2	1	1	51	2	2	2	2	2	2	2	2	2	2	1	2	2	2	2	#NULL!	1	1	46	2	2	2	2	2	2	2	2	2	2	2
2	5	2002-12-06	16	3	2	2	0	3	2	2	1	1	2	2	2	2	1	2	#NULL!	3	2	2	2	2	2	2	2	2	2	2	2	2	2	1	#NULL!	1	2	#NULL!	1	2	2	2	2	2	2	2	2	2	2
2	1	2002-02-09	17	3	2	2	0	4	1	1	1	2	2	2	2	2	1	2	#NULL!	2	2	2	2	2	2	2	2	2	2	2	2	2	2	1	#NULL!	1	2	#NULL!	3	2	2	2	2	2	2	2	2	2	2
1	5	2002-08-27	17	3	2	1	0	2	1	1	2	2	2	2	2	2	1	2	#NULL!	4	2	2	2	2	2	2	2	2	2	2	2	2	2	1	#NULL!	1	2	#NULL!	4	2	2	2	2	2	2	2	2	2	2
1	6	2002-06-24	17	3	2	2	2	3	1	1	2	1	2	2	2	2	1	1	46	5	2	2	2	2	2	2	2	2	2	2	2	2	1	2	#NULL!	1	1	43	5	2	2	2	2	2	2	2	1	2	2
1	3	2003-12-05	15	3	2	2	0	3	1	1	2	1	2	2	2	2	1	1	39	3	2	2	2	2	2	2	2	2	2	2	1	2	2	2	#NULL!	1	1	36	2	2	2	2	2	2	2	2	2	2	2
2	6	2004-07-29	15	3	2	1	1	6	1	1	1	2	2	2	2	2	1	1	44	5	2	2	2	2	2	2	2	2	2	1	2	2	2	2	#NULL!	1	1	44	5	2	2	2	2	2	2	2	2	2	2
1	3	2006-12-12	12	2	2	1	0	4	1	1	2	2	1	2	2	2	1	1	40	3	2	2	2	2	2	2	2	2	2	2	2	2	2	1	#NULL!	1	1	39	1	2	2	2	2	2	2	2	2	2	2
1	3	2006-03-03	13	2	2	2	0	6	1	1	1	1	2	2	2	2	1	1	35	3	2	2	2	2	2	2	2	2	2	2	2	2	2	1	#NULL!	1	1	31	2	2	2	2	2	2	2	2	2	2	2
1	1	2005-12-16	13	2	2	2	2	3	1	1	2	1	2	2	2	2	1	1	46	1	2	2	2	2	2	2	2	2	2	2	1	2	2	2	#NULL!	1	1	39	2	2	2	2	2	2	2	2	2	2	2
2	1	2004-12-16	14	2	2	2	0	2	1	2	2	1	2	2	2	2	2	#NULL!	#NULL!	#NULL!	#NULL!	#NULL!	#NULL!	#NULL!	#NULL!	#NULL!	#NULL!	#NULL!	#NULL!	#NULL!	#NULL!	#NULL!	#NULL!	#NULL!	14	1	1	40	3	2	2	2	2	2	2	2	2	2	2
1	1	2006-01-15	13	2	2	2	0	5	1	1	2	1	2	2	2	2	1	1	31	3	2	2	1	2	2	2	2	2	2	2	2	2	2	2	#NULL!	1	1	32	2	2	2	2	2	2	2	2	2	2	2
2	3	2006-03-29	13	2	2	2	0	3	1	1	2	1	2	2	2	2	1	1	50	2	2	2	2	2	2	2	2	2	2	2	2	2	2	1	#NULL!	1	1	45	4	2	2	2	2	2	2	2	2	2	2
1	1	2007-03-04	12	2	2	2	0	5	1	1	2	2	2	2	2	2	1	1	38	3	2	2	2	2	2	1	2	2	2	2	2	2	2	2	#NULL!	1	2	#NULL!	3	2	2	2	2	2	2	2	2	2	2
1	6	2002-06-05	17	3	2	1	0	1	2	1	2	2	2	2	2	2	1	1	49	0	2	2	2	2	2	2	2	2	2	2	2	2	2	1	#NULL!	1	2	#NULL!	0	2	2	2	2	2	2	2	2	2	2
1	1	2002-08-18	17	3	2	2	0	3	1	1	2	1	2	2	2	2	1	1	43	3	2	2	2	2	2	2	2	2	2	2	2	2	2	1	#NULL!	1	1	41	2	2	2	2	2	2	2	2	2	2	2
1	2	2005-06-08	14	2	2	2	0	6	1	1	2	1	2	2	2	1	1	1	38	1	2	2	2	2	2	2	2	2	2	2	2	2	2	1	#NULL!	1	1	40	2	2	2	1	2	2	2	2	2	2	2
1	1	2007-05-07	12	2	2	2	0	6	2	1	1	1	2	2	2	2	1	1	46	0	2	2	1	2	2	2	2	2	2	2	2	2	1	2	#NULL!	2	#NULL!	#NULL!	#NULL!	#NULL!	#NULL!	#NULL!	#NULL!	#NULL!	#NULL!	#NULL!	#NULL!	#NULL!	#NULL!
1	1	2006-01-08	13	2	2	1	0	2	2	1	2	2	2	2	2	1	1	2	#NULL!	4	2	2	2	2	2	2	2	2	2	2	2	2	1	2	#NULL!	1	2	#NULL!	4	2	2	2	2	2	2	2	2	2	2
2	1	2004-10-05	15	2	2	2	0	4	1	1	2	1	2	2	2	2	1	1	42	2	2	2	2	2	2	2	2	2	2	2	2	2	2	1	#NULL!	1	1	36	2	2	2	2	2	2	2	2	2	2	2
2	1	2005-01-16	14	2	1	2	2	3	1	1	2	1	2	2	2	2	1	2	#NULL!	2	2	2	2	2	2	2	2	2	2	2	2	2	1	2	#NULL!	1	2	#NULL!	0	2	2	2	2	2	2	2	2	2	2
1	1	2002-05-12	17	3	2	2	0	2	1	1	2	2	2	2	2	2	1	1	52	2	2	2	2	2	2	2	2	2	2	2	2	2	2	1	#NULL!	1	1	43	2	2	2	2	2	2	2	2	2	2	2
2	1	2002-09-10	17	3	2	2	0	5	1	1	1	1	2	2	2	2	1	1	44	3	2	2	2	2	2	2	2	2	2	1	2	2	2	2	#NULL!	1	1	44	3	2	2	2	2	2	2	2	2	2	1
1	3	2006-05-06	13	2	2	2	0	4	1	1	2	1	2	2	2	2	1	1	45	2	2	2	2	2	2	2	2	2	2	2	2	2	2	1	#NULL!	1	1	42	2	2	2	2	2	2	2	2	2	2	2
1	5	2006-05-04	13	2	2	2	1	3	1	1	2	1	2	2	2	2	1	1	39	3	2	2	2	2	2	2	2	2	2	2	2	2	1	2	#NULL!	1	1	31	3	2	2	2	2	2	2	2	2	2	2
1	1	2007-07-26	12	2	2	2	0	3	1	1	2	1	2	2	2	2	1	1	41	2	2	2	2	2	2	2	2	2	2	2	2	2	2	1	#NULL!	1	1	38	2	1	2	2	2	2	2	2	2	2	2
2	1	2004-01-11	15	3	2	2	0	3	1	1	2	1	2	2	2	2	1	1	40	2	2	2	2	2	2	2	2	2	2	2	2	2	1	2	#NULL!	1	1	40	2	2	2	2	2	2	2	2	2	2	2
2	3	2004-03-28	15	3	2	2	0	3	1	1	2	2	2	2	2	1	1	1	57	2	2	2	1	2	2	2	2	2	2	2	2	2	1	2	#NULL!	1	1	53	2	2	2	2	2	2	2	2	2	2	2
1	1	2005-08-29	14	2	1	1	0	2	1	1	2	2	2	2	2	2	1	1	52	3	2	2	2	2	2	2	2	2	2	2	2	2	2	1	#NULL!	1	1	38	2	2	2	2	2	2	2	2	2	2	2
1	1	2006-02-21	13	2	2	2	0	4	2	2	2	2	1	1	2	2	1	2	#NULL!	0	2	2	2	2	2	2	2	2	2	2	2	2	2	1	#NULL!	1	2	#NULL!	0	2	2	2	2	2	2	2	2	2	2
1	1	2005-12-25	13	2	1	2	0	2	1	1	2	2	2	2	2	2	1	1	43	2	2	2	2	2	2	2	2	2	2	2	2	2	2	1	#NULL!	1	1	40	3	2	2	2	2	2	2	2	2	2	2
1	1	2006-12-20	12	2	2	2	0	2	1	1	2	2	2	2	2	2	1	1	46	2	2	2	2	2	2	2	2	2	2	2	2	2	2	1	#NULL!	1	1	40	2	2	2	2	2	2	2	2	2	2	2
2	1	2003-08-28	16	3	2	2	0	2	1	2	2	1	2	2	2	2	1	1	45	3	2	2	2	2	2	2	2	2	2	2	2	2	2	1	#NULL!	1	1	39	2	2	2	2	2	2	2	2	2	2	2
2	6	2003-11-16	16	3	2	2	0	4	1	1	1	2	2	2	2	2	1	1	43	2	2	2	2	2	2	2	2	2	2	2	2	2	2	1	#NULL!	1	1	36	3	2	2	2	2	2	2	2	2	2	2
2	1	2003-08-20	16	3	2	2	0	10	1	1	2	1	1	1	2	2	1	1	46	2	2	2	2	2	2	2	2	2	2	2	2	2	2	1	#NULL!	1	1	42	1	2	2	2	2	2	2	2	2	2	2
2	1	2007-04-17	12	2	2	2	0	3	1	1	2	1	2	2	2	2	1	2	#NULL!	3	2	2	2	2	2	2	2	2	2	2	2	2	2	1	#NULL!	1	2	#NULL!	4	2	2	2	2	2	2	2	2	2	2
1	1	2005-11-06	14	2	2	1	0	4	1	1	2	2	2	2	2	1	1	1	40	3	2	2	2	2	2	2	2	2	2	2	2	2	2	1	#NULL!	1	1	41	2	2	2	2	2	2	2	2	2	2	2
1	3	2005-12-17	13	2	2	2	0	3	1	1	2	1	2	2	2	2	1	2	#NULL!	2	2	2	2	2	2	2	2	2	2	2	2	2	2	1	#NULL!	1	1	36	2	2	2	2	2	2	2	2	2	2	2
1	1	2009-08-17	10	2	2	2	0	3	1	1	2	2	2	2	2	1	1	2	#NULL!	3	2	2	2	2	2	2	2	2	2	2	2	2	2	1	#NULL!	1	2	#NULL!	2	2	2	2	2	2	2	2	2	2	2
2	3	2003-04-21	16	3	2	1	1	2	1	1	2	2	2	2	2	2	1	1	48	0	2	2	2	2	2	2	2	2	2	2	2	2	1	2	#NULL!	1	1	47	2	2	2	2	2	2	2	2	2	2	2
2	1	2002-10-06	17	3	2	1	0	2	2	2	1	2	2	2	2	2	1	1	40	2	2	2	2	2	2	2	2	2	2	2	2	2	2	1	#NULL!	1	2	#NULL!	0	2	2	2	2	2	2	2	2	2	2
2	1	2007-01-17	12	2	2	2	0	3	1	1	2	1	2	2	2	2	1	1	41	3	2	2	2	2	2	2	2	2	2	2	2	2	2	1	#NULL!	1	1	40	2	2	2	2	2	2	2	2	2	2	2
2	1	2003-02-14	16	3	2	2	0	3	1	1	2	1	2	2	2	2	1	1	41	3	2	2	2	2	2	2	2	2	2	1	2	2	2	2	#NULL!	1	1	39	3	2	2	2	2	2	2	2	2	2	1
1	6	2004-03-24	15	3	2	1	3	2	1	1	2	2	2	2	2	2	1	1	45	3	2	2	2	2	2	2	2	2	2	2	2	2	2	1	#NULL!	1	1	40	3	2	2	2	2	2	2	2	2	2	2
2	1	2005-01-02	14	2	2	2	1	5	1	1	1	1	2	2	2	2	1	1	41	3	2	2	2	2	2	2	2	2	2	2	2	2	2	1	#NULL!	1	1	37	3	2	2	2	2	2	2	2	2	2	2
1	1	2003-02-14	16	3	2	2	0	5	1	1	1	1	2	2	2	2	1	2	#NULL!	3	2	2	2	2	2	2	2	2	2	2	2	2	2	1	#NULL!	1	2	#NULL!	2	2	2	2	2	2	2	2	2	2	2
2	1	2004-06-11	15	3	2	2	4	2	2	1	2	1	2	2	2	2	1	1	46	2	2	2	2	2	2	2	2	2	2	2	2	2	2	1	#NULL!	1	1	42	1	2	2	2	2	2	2	2	2	2	2
1	1	2006-07-29	13	2	2	2	0	3	1	2	2	1	2	2	2	1	1	1	37	3	2	2	2	2	2	2	2	2	2	2	2	2	2	1	#NULL!	1	1	39	3	2	2	2	2	2	2	2	2	2	2
2	1	2006-08-27	13	2	2	1	1	4	1	2	2	2	1	2	1	2	1	2	#NULL!	3	2	2	2	2	2	2	2	2	2	2	2	2	2	1	#NULL!	1	1	36	3	2	2	2	2	2	2	2	2	2	2
1	1	2005-02-17	14	2	2	2	1	5	1	1	1	1	2	2	2	2	1	1	45	3	2	2	2	2	2	2	2	2	2	2	2	2	2	1	#NULL!	1	1	44	3	2	2	2	2	2	2	2	2	2	2
1	1	2005-12-06	13	2	2	2	0	3	1	1	2	1	2	2	2	2	1	1	42	4	2	2	1	2	2	2	2	2	2	2	2	2	2	2	#NULL!	1	1	39	4	2	2	2	2	2	2	2	2	2	2
1	6	2005-12-13	13	2	2	2	0	6	1	1	1	1	1	2	2	2	1	1	45	4	2	2	2	2	2	2	2	2	2	2	2	2	2	1	#NULL!	1	1	42	2	2	2	2	2	2	2	2	2	2	2
2	1	2003-08-14	16	3	2	2	0	2	1	2	2	1	2	2	2	2	2	#NULL!	#NULL!	#NULL!	#NULL!	#NULL!	#NULL!	#NULL!	#NULL!	#NULL!	#NULL!	#NULL!	#NULL!	#NULL!	#NULL!	#NULL!	#NULL!	#NULL!	10	1	1	46	1	2	2	2	2	2	2	2	2	2	2
2	3	2005-10-14	14	2	2	2	0	2	1	2	2	1	2	2	2	2	1	2	#NULL!	3	2	2	2	2	2	2	2	2	2	2	2	2	2	1	#NULL!	1	1	39	3	2	2	2	2	2	2	2	2	2	2
1	6	2002-09-15	17	3	2	2	0	4	1	1	1	2	2	2	2	2	1	1	46	2	2	2	2	2	2	2	2	2	2	2	2	2	1	2	#NULL!	1	1	44	2	2	2	2	2	2	2	2	2	2	2
1	1	2003-07-27	16	3	2	2	0	5	1	1	1	1	2	2	2	2	1	1	44	4	2	2	2	2	2	2	2	2	2	2	2	2	1	2	#NULL!	1	2	#NULL!	3	2	2	2	2	2	2	2	2	2	2
1	1	2006-02-07	13	2	2	2	0	4	1	1	2	1	2	2	2	2	1	1	40	3	2	2	2	2	2	2	2	2	2	2	2	2	2	1	#NULL!	1	1	40	3	2	2	2	2	2	2	2	2	2	2
2	1	2003-11-21	16	3	2	2	0	3	1	1	2	1	2	2	2	2	1	1	44	2	2	2	2	2	2	2	2	1	2	2	2	2	2	2	#NULL!	1	1	41	2	2	2	2	2	2	2	2	2	2	2
2	1	2006-08-20	13	2	2	2	0	2	1	2	2	1	2	2	2	2	1	1	39	2	2	2	2	2	2	2	2	2	2	2	2	2	2	1	#NULL!	1	1	32	0	2	2	2	2	2	2	2	2	2	2
2	1	2002-04-15	17	3	2	2	0	3	2	1	1	2	2	2	2	2	1	1	47	3	2	2	2	2	2	2	2	2	2	2	2	2	1	2	#NULL!	1	1	43	2	2	2	2	2	2	2	2	1	2	2
2	1	2006-10-27	13	2	2	2	0	4	1	2	1	1	2	2	2	2	1	1	35	3	2	2	2	2	2	2	2	2	2	2	2	2	2	1	#NULL!	1	1	36	2	2	2	2	2	2	2	2	2	2	2
2	6	2003-08-01	16	3	2	1	1	2	1	1	2	2	2	2	2	2	1	1	43	5	2	2	2	2	2	2	2	2	2	2	2	2	2	1	#NULL!	1	1	39	5	2	2	2	2	2	2	2	2	2	2
1	1	2005-10-28	14	2	2	1	1	3	1	1	1	2	2	2	2	2	1	1	52	4	2	2	1	1	2	2	2	2	2	2	2	2	1	2	#NULL!	1	1	48	3	2	2	1	2	2	2	2	2	2	2
2	6	2003-12-28	15	3	2	2	0	3	2	2	2	2	1	1	2	2	1	1	45	4	2	2	2	2	2	2	2	2	2	2	2	2	2	1	#NULL!	1	1	45	4	2	2	2	2	2	2	2	2	2	2
1	1	2004-07-31	15	2	1	2	0	5	1	1	1	1	2	2	2	2	1	1	48	3	2	2	2	2	2	2	2	2	2	2	2	2	2	1	#NULL!	1	2	#NULL!	2	2	2	2	2	2	2	2	2	2	2
2	1	2002-09-20	17	3	2	2	0	4	1	1	1	1	2	2	2	2	1	1	40	2	2	2	1	2	2	2	2	2	2	2	2	2	2	2	#NULL!	1	1	42	3	1	2	2	2	2	2	2	2	2	2
2	3	2002-06-17	17	3	2	2	0	5	2	2	1	2	1	1	2	2	2	#NULL!	#NULL!	#NULL!	#NULL!	#NULL!	#NULL!	#NULL!	#NULL!	#NULL!	#NULL!	#NULL!	#NULL!	#NULL!	#NULL!	#NULL!	#NULL!	#NULL!	3	1	2	#NULL!	1	2	2	2	2	2	2	2	2	2	1
1	1	2005-08-27	14	2	2	2	0	3	2	2	2	2	2	1	1	2	1	1	40	5	2	2	2	2	2	2	2	2	2	2	2	2	2	1	#NULL!	1	1	41	5	2	2	2	2	2	2	2	2	2	2
2	6	2006-01-05	13	2	2	2	0	4	1	1	2	1	2	2	2	2	1	1	35	1	2	2	2	2	2	2	2	2	2	2	2	2	2	1	#NULL!	1	1	33	3	2	2	2	2	2	2	2	2	2	1
2	3	2003-02-03	16	3	2	2	4	2	1	2	2	1	2	2	2	2	2	#NULL!	#NULL!	#NULL!	#NULL!	#NULL!	#NULL!	#NULL!	#NULL!	#NULL!	#NULL!	#NULL!	#NULL!	#NULL!	#NULL!	#NULL!	#NULL!	#NULL!	6	1	1	40	2	2	2	2	2	2	2	2	2	2	2
2	1	2004-05-30	15	2	2	2	0	2	2	2	2	2	2	1	2	2	1	2	#NULL!	2	2	2	2	2	2	2	2	2	2	1	2	2	2	2	#NULL!	1	2	#NULL!	1	2	2	2	2	2	2	2	2	2	2
1	1	2006-07-26	13	2	2	1	0	3	1	1	2	2	1	2	2	2	1	1	57	5	2	2	2	2	2	2	2	2	2	2	2	2	2	1	#NULL!	1	2	#NULL!	3	2	2	2	2	2	2	2	2	2	2
1	1	2003-05-05	16	3	2	2	1	3	1	1	2	2	2	2	2	2	1	1	44	3	2	2	2	2	2	2	2	2	2	2	2	2	2	1	#NULL!	1	1	42	2	2	2	2	2	2	2	2	2	2	2
2	1	2002-12-08	16	3	2	2	0	0	2	1	2	2	2	2	2	2	1	1	46	2	2	2	2	2	2	1	2	2	2	2	2	2	2	2	#NULL!	2	#NULL!	#NULL!	#NULL!	#NULL!	#NULL!	#NULL!	#NULL!	#NULL!	#NULL!	#NULL!	#NULL!	#NULL!	#NULL!
1	1	2007-01-01	12	2	1	2	0	3	1	1	2	1	2	2	2	2	1	2	#NULL!	2	2	2	2	2	2	2	2	2	2	2	2	2	2	1	#NULL!	1	2	#NULL!	2	2	2	2	2	2	2	2	2	2	2
1	4	2007-03-27	12	2	1	2	0	4	1	1	2	1	2	2	2	2	1	2	#NULL!	0	2	2	2	2	2	2	2	2	2	2	2	2	2	1	#NULL!	1	2	#NULL!	0	2	2	1	2	2	2	2	2	2	2
2	1	2003-02-06	16	3	2	2	4	3	1	1	2	1	2	2	2	2	1	1	46	5	2	2	1	1	2	2	2	2	2	2	1	2	2	2	#NULL!	1	1	37	3	2	2	2	2	2	2	2	2	2	2
1	1	2002-05-18	17	3	2	1	0	2	1	1	2	2	2	2	2	2	1	1	45	3	2	2	2	2	2	2	2	2	2	2	2	2	2	1	#NULL!	1	1	44	2	2	2	2	2	2	2	2	2	2	2
2	6	2002-08-04	17	3	2	1	0	2	1	1	2	2	2	2	2	2	1	1	39	4	2	2	1	2	2	2	2	2	2	2	2	2	2	2	#NULL!	1	1	42	4	2	2	2	2	2	2	2	2	2	2
1	1	2003-09-01	16	3	2	2	0	3	1	1	2	1	2	2	2	2	1	1	41	1	2	2	2	2	2	2	2	2	2	2	2	2	2	1	#NULL!	1	1	38	1	2	2	2	2	2	2	2	2	2	2
2	1	2005-09-06	14	2	2	2	0	3	1	1	2	1	2	2	2	2	1	1	40	3	2	2	2	2	2	2	2	2	2	2	2	2	2	1	#NULL!	1	1	41	3	2	2	2	2	2	2	2	2	2	2
1	1	2004-08-25	15	3	2	2	0	6	1	1	1	1	2	2	2	2	1	1	42	4	2	2	2	2	2	2	2	2	2	2	2	2	2	1	#NULL!	1	1	40	3	2	2	2	2	2	2	2	2	2	2
1	5	2003-12-01	16	3	2	2	0	10	1	1	1	1	1	1	1	2	1	1	43	4	2	2	1	2	2	2	2	2	2	2	2	2	2	2	#NULL!	1	1	41	3	2	2	2	2	2	2	2	2	2	2
2	1	2004-09-20	15	3	2	1	0	2	1	1	2	2	2	2	2	2	1	1	42	4	2	2	2	2	2	2	2	2	2	2	2	2	2	1	#NULL!	1	1	41	3	2	2	2	2	2	2	2	2	2	2
2	1	2003-03-28	16	3	2	2	0	3	1	1	2	1	2	2	2	2	1	1	47	3	2	2	2	2	2	2	2	2	2	2	2	2	2	1	#NULL!	1	1	42	2	2	2	2	2	2	2	2	2	2	1
1	1	2002-01-01	17	3	2	2	0	4	1	1	2	1	2	2	2	2	1	1	40	2	2	2	2	2	2	2	2	2	2	2	2	2	2	1	#NULL!	1	1	38	2	2	2	2	2	2	2	2	2	2	2
2	6	2005-01-16	14	2	2	2	1	5	1	1	1	1	2	2	2	2	1	1	38	2	2	2	2	2	2	2	2	2	2	1	2	2	2	2	#NULL!	1	1	36	2	1	2	2	2	2	2	2	2	2	2
1	1	2006-04-01	13	2	2	2	0	5	1	1	1	1	2	2	2	2	1	2	#NULL!	0	2	2	2	2	2	2	2	2	2	2	2	2	2	1	#NULL!	1	2	#NULL!	0	2	2	2	2	2	2	2	2	2	2
1	1	2004-06-05	15	3	2	2	0	2	1	2	2	1	2	2	2	2	1	1	47	4	2	2	2	2	2	2	2	2	2	2	2	2	2	1	#NULL!	1	1	51	2	2	2	2	2	2	2	2	2	2	2
1	1	2004-10-09	15	3	2	2	0	2	1	1	2	2	2	2	2	2	1	1	44	3	2	2	2	2	2	2	2	2	2	2	2	2	2	1	#NULL!	1	1	41	2	2	2	2	2	2	2	2	2	2	2
1	3	2003-08-06	16	3	2	2	0	5	2	2	1	2	1	2	2	2	1	1	40	3	2	2	2	2	2	2	2	2	2	2	2	2	1	2	#NULL!	1	1	30	2	2	2	2	2	2	2	2	2	2	2
2	1	2006-11-29	13	2	2	1	1	1	2	1	2	2	2	2	2	2	1	1	51	5	2	2	2	2	2	2	2	2	2	2	2	2	2	1	#NULL!	2	#NULL!	#NULL!	#NULL!	#NULL!	#NULL!	#NULL!	#NULL!	#NULL!	#NULL!	#NULL!	#NULL!	#NULL!	#NULL!
1	6	2003-05-20	16	3	2	2	0	1	1	2	2	2	2	2	2	2	1	1	42	3	2	2	1	2	2	2	2	2	2	2	2	2	2	2	#NULL!	1	1	41	3	2	2	2	2	2	2	2	2	2	2
1	5	2002-08-07	17	3	2	2	0	1	1	2	2	2	2	2	2	2	1	1	48	5	2	2	1	2	2	2	2	2	2	1	2	2	2	2	#NULL!	1	1	45	5	2	2	2	2	2	2	2	2	2	2
2	1	2005-08-20	14	2	2	2	0	3	1	1	2	1	2	2	2	2	1	1	43	3	2	2	2	2	1	2	2	2	2	2	2	2	2	2	#NULL!	1	1	42	2	2	2	2	2	2	2	2	2	2	2
1	1	2004-11-16	15	3	2	1	2	2	1	1	2	2	2	2	2	2	1	1	40	2	2	2	2	2	2	2	2	2	2	2	2	2	2	1	#NULL!	1	1	38	3	2	2	2	2	2	2	2	2	2	2
2	1	2005-05-05	14	2	2	2	1	4	1	1	2	1	2	2	2	2	1	1	44	2	2	2	2	2	2	2	2	2	2	2	2	2	2	1	#NULL!	1	1	41	1	2	2	2	2	2	2	2	2	2	2
2	6	2004-05-04	15	2	2	2	1	3	1	1	2	1	2	2	2	2	1	1	45	4	2	2	2	2	2	2	2	2	2	2	2	2	2	1	#NULL!	1	1	42	3	2	2	2	2	2	2	2	2	2	2
2	6	2005-05-10	14	2	2	2	0	4	1	1	1	1	2	2	2	2	1	1	41	0	2	2	2	2	2	2	2	2	2	2	2	2	2	1	#NULL!	1	1	35	0	2	2	2	2	2	2	2	2	2	2
2	1	2005-11-08	14	2	2	2	0	3	1	1	2	1	2	2	2	2	1	1	40	4	2	2	2	2	2	2	2	2	2	2	2	2	2	1	#NULL!	1	1	36	3	2	2	2	2	2	2	2	2	2	2
1	1	2005-09-09	14	2	2	2	0	4	1	1	2	1	2	2	2	2	1	1	39	4	2	2	2	2	2	2	2	2	2	2	2	2	2	1	#NULL!	1	1	38	4	2	2	2	2	2	2	2	2	2	2
1	3	2004-01-16	15	3	2	2	0	2	1	2	2	2	2	2	2	1	1	1	46	2	2	2	2	2	2	2	2	2	2	2	2	2	2	1	#NULL!	1	1	47	2	2	2	2	2	2	2	1	2	2	2
2	1	2004-01-11	15	3	2	2	0	6	1	1	1	1	2	2	2	2	1	1	41	3	2	2	1	2	2	2	2	2	2	2	1	2	2	2	#NULL!	1	1	39	3	2	2	2	2	2	2	2	2	2	2
1	5	2007-02-13	12	2	2	2	0	2	2	2	1	1	2	2	2	2	1	2	#NULL!	3	2	2	2	2	2	2	2	2	2	2	2	2	2	1	#NULL!	1	2	#NULL!	0	2	2	2	2	2	2	2	2	2	2
2	1	2006-04-18	13	2	2	2	0	4	1	1	2	1	2	2	2	2	1	1	38	3	2	2	2	2	2	2	2	2	2	2	2	2	2	1	#NULL!	1	1	36	3	2	2	2	2	2	2	2	2	2	2
2	3	2003-04-23	16	3	2	2	0	3	1	1	1	2	2	2	2	2	1	1	43	3	2	2	2	2	2	2	2	2	2	2	2	2	2	1	#NULL!	1	1	41	2	2	2	2	2	2	2	2	2	2	2
2	1	2004-08-07	15	3	2	2	0	1	1	2	2	2	2	2	2	2	2	#NULL!	#NULL!	#NULL!	#NULL!	#NULL!	#NULL!	#NULL!	#NULL!	#NULL!	#NULL!	#NULL!	#NULL!	#NULL!	#NULL!	#NULL!	#NULL!	#NULL!	14	1	1	41	3	2	2	2	2	2	2	2	2	2	2
2	1	2004-01-06	15	3	1	1	0	2	1	1	2	2	2	2	2	2	1	1	43	5	2	2	1	2	2	2	2	2	2	2	2	2	2	2	#NULL!	1	1	44	3	2	2	2	2	2	2	2	2	2	2
2	5	2005-06-03	14	2	2	2	0	3	1	1	2	1	2	2	2	2	1	1	40	3	2	2	2	2	2	2	2	2	2	2	2	2	2	1	#NULL!	1	1	41	4	2	2	2	2	2	2	2	2	2	2
1	6	2003-07-13	16	3	2	2	0	3	1	1	1	2	2	2	2	2	1	1	52	4	1	2	2	2	2	2	2	2	2	2	2	2	2	2	#NULL!	1	1	42	3	2	2	2	2	2	2	2	2	2	2
1	1	2003-02-26	16	3	2	2	0	4	1	1	1	1	2	2	2	2	1	2	#NULL!	2	2	2	1	2	2	2	2	2	2	2	2	2	2	2	#NULL!	1	2	#NULL!	2	2	2	1	2	2	2	2	2	2	2
2	1	2004-02-18	15	3	2	2	0	4	1	1	2	1	2	2	2	2	1	1	46	3	2	2	2	2	2	2	2	2	2	2	2	2	2	1	#NULL!	1	1	38	2	2	2	2	2	2	2	2	2	2	2
2	3	2004-06-23	15	2	2	1	1	1	1	2	2	2	2	2	2	2	1	1	40	5	2	2	2	2	2	2	2	2	2	2	2	2	2	1	#NULL!	1	1	39	4	2	2	2	2	2	2	2	2	2	2
2	1	2002-12-29	16	3	2	1	0	4	1	1	1	2	2	2	2	2	1	1	48	2	2	2	2	1	2	2	2	2	2	2	2	2	2	2	#NULL!	1	1	45	3	2	2	2	2	2	2	2	2	2	1
1	1	2004-03-05	15	3	2	2	0	2	1	1	2	2	2	2	2	2	1	1	49	1	2	2	2	2	2	2	2	2	2	2	2	2	2	1	#NULL!	1	1	45	4	2	2	2	2	2	2	2	2	2	2
1	1	2003-10-23	16	3	2	2	0	3	1	2	2	1	2	2	2	2	1	2	#NULL!	2	2	2	2	2	2	2	2	2	2	2	2	2	2	1	#NULL!	1	2	#NULL!	1	2	2	2	2	2	2	2	2	2	2
2	1	2002-08-12	17	3	2	2	1	5	1	1	1	1	2	2	2	2	1	1	42	2	2	2	2	2	2	2	2	2	2	2	2	2	1	2	#NULL!	1	1	39	2	2	2	2	2	2	2	2	2	2	2
2	3	2002-09-27	17	3	2	2	1	3	1	1	2	1	2	2	2	2	1	1	44	2	2	2	2	2	2	2	2	2	2	2	2	2	1	2	#NULL!	1	1	42	2	2	2	2	2	2	2	2	2	2	2
1	5	2003-08-14	16	3	2	2	0	4	1	1	1	1	2	2	2	2	1	1	39	3	2	2	2	2	2	2	2	2	2	2	2	2	2	1	#NULL!	1	1	37	3	2	2	2	2	2	2	2	2	2	2
1	1	2003-04-28	16	3	2	2	4	4	1	1	1	1	2	2	2	2	1	2	#NULL!	5	2	2	2	2	2	2	2	2	2	2	2	2	1	2	#NULL!	1	2	#NULL!	5	2	2	2	2	2	2	2	2	2	2
1	1	2004-10-08	15	2	2	1	0	2	1	1	2	2	2	2	2	2	1	1	47	3	2	2	2	2	2	2	2	2	2	2	2	2	2	1	#NULL!	1	1	45	3	2	2	2	2	2	2	2	2	2	2
1	1	2005-12-11	13	2	2	2	1	1	2	2	2	1	2	2	2	2	1	2	#NULL!	2	2	2	2	2	2	2	2	2	2	2	2	2	2	1	#NULL!	1	2	#NULL!	2	2	2	2	2	2	2	2	2	2	2
1	1	2005-02-03	14	2	2	2	0	3	1	1	2	1	2	2	2	2	1	1	37	2	2	2	2	2	2	2	2	2	2	2	2	2	2	1	#NULL!	1	1	36	3	2	2	2	2	2	2	2	2	2	2
1	1	2005-05-19	14	2	2	2	0	4	1	1	2	1	2	2	2	2	1	1	40	3	2	2	2	2	2	2	2	2	2	2	2	2	2	1	#NULL!	1	1	36	3	2	2	2	2	2	2	2	2	2	2
2	3	2004-07-04	15	2	2	2	0	3	1	1	2	1	2	2	2	2	1	1	43	3	2	2	2	2	2	2	2	2	2	2	2	2	2	1	#NULL!	1	1	42	1	2	2	2	2	2	2	2	2	2	2
1	1	2006-02-19	13	2	2	1	0	2	1	1	2	2	2	2	2	2	1	1	38	2	2	2	2	2	2	2	2	2	2	2	2	2	2	1	#NULL!	1	1	36	4	2	2	2	2	2	2	2	2	2	2
2	1	2006-10-04	13	2	2	1	0	4	1	1	2	2	2	2	2	1	1	1	34	4	2	1	2	2	2	2	2	2	2	2	2	2	2	2	#NULL!	1	1	32	2	2	2	2	2	2	2	2	2	2	2
2	5	2006-11-25	13	2	2	1	0	3	1	2	1	2	1	2	2	2	1	1	33	2	2	2	2	2	2	2	2	2	2	2	2	2	2	1	#NULL!	1	1	42	4	2	2	2	2	2	2	2	2	2	2
1	1	2004-11-12	15	3	2	2	0	3	2	2	2	1	2	1	2	2	2	#NULL!	#NULL!	#NULL!	#NULL!	#NULL!	#NULL!	#NULL!	#NULL!	#NULL!	#NULL!	#NULL!	#NULL!	#NULL!	#NULL!	#NULL!	#NULL!	#NULL!	2	1	2	#NULL!	2	2	2	2	2	2	2	2	2	2	2
2	1	2004-02-04	15	3	2	2	0	2	1	1	2	2	2	2	2	2	1	1	51	3	2	2	2	2	2	2	2	2	2	2	2	2	2	1	#NULL!	1	1	46	3	2	2	2	2	2	2	2	2	2	2
2	6	2003-02-16	16	3	2	2	0	3	1	1	2	1	2	2	2	2	1	1	49	2	1	2	2	2	2	1	2	2	2	2	2	2	2	2	#NULL!	1	1	39	2	2	2	2	2	2	2	2	2	2	2
2	1	2002-11-26	17	3	2	2	0	4	1	1	1	1	2	2	2	2	1	1	46	5	2	2	1	2	2	2	2	2	2	2	2	2	2	2	#NULL!	1	1	41	3	2	2	2	2	2	2	2	2	2	2
2	1	2002-07-30	17	3	2	2	0	4	1	1	1	1	2	2	2	2	1	1	42	3	2	2	2	2	2	2	2	2	2	2	2	2	2	1	#NULL!	1	1	42	2	2	2	2	2	2	2	2	2	2	2
1	3	2002-06-18	17	3	2	1	2	3	1	1	2	2	2	2	2	2	1	1	38	2	2	2	2	2	2	2	2	2	2	2	2	2	2	1	#NULL!	1	1	41	1	2	2	2	2	2	2	2	2	2	2
1	1	2005-09-13	14	2	2	1	0	4	1	1	2	2	2	2	2	2	1	2	#NULL!	4	2	2	2	2	2	2	2	2	2	2	2	2	2	1	#NULL!	1	2	#NULL!	3	2	2	2	2	2	2	2	2	2	2
1	1	2006-02-05	13	2	2	2	0	14	1	1	1	1	2	2	2	1	1	1	34	3	2	2	2	2	2	2	2	2	2	2	2	2	2	1	#NULL!	1	1	32	2	2	2	2	2	2	2	2	2	2	2
2	1	2006-10-07	13	2	2	2	0	4	1	1	2	1	2	2	2	2	1	1	37	1	2	2	2	2	2	2	2	2	2	2	1	2	2	2	#NULL!	1	1	42	3	2	2	2	2	2	2	2	2	2	2
2	1	2006-01-19	13	2	2	2	0	3	1	1	1	2	2	2	2	2	1	1	45	2	2	2	1	2	2	2	2	2	2	2	2	2	2	2	#NULL!	1	1	44	4	2	2	2	2	2	2	2	2	2	2
2	3	2004-09-02	15	3	2	1	0	5	2	2	2	2	1	2	1	2	1	2	#NULL!	0	2	2	2	2	2	2	2	2	2	2	2	2	2	1	#NULL!	1	1	42	4	2	2	2	2	2	2	2	2	2	2
1	1	2003-10-06	16	3	2	1	0	4	1	1	2	2	2	2	2	2	1	2	#NULL!	2	2	2	2	2	2	2	2	2	2	2	2	2	2	1	#NULL!	1	2	#NULL!	3	2	2	2	2	2	2	2	2	2	2
2	1	2006-07-26	13	2	2	2	2	2	2	2	1	2	2	2	1	2	1	2	#NULL!	3	2	2	1	1	2	2	2	2	2	2	2	2	2	2	#NULL!	1	1	37	2	2	2	1	2	2	2	2	2	2	2
1	1	2002-12-29	16	3	2	1	0	1	2	2	2	2	2	1	2	2	1	2	#NULL!	2	2	2	2	2	2	2	2	2	2	1	2	2	2	2	#NULL!	1	2	#NULL!	3	2	2	2	2	2	2	2	2	2	1
2	1	2006-06-30	13	2	2	2	0	6	1	1	1	1	1	2	2	2	1	2	#NULL!	4	2	2	2	2	2	2	2	2	2	2	2	2	2	1	#NULL!	1	2	#NULL!	3	2	2	2	2	2	2	2	2	2	2
1	3	2002-04-23	17	3	2	2	0	3	1	2	2	2	2	2	1	2	1	1	39	2	2	2	2	2	2	2	2	2	2	2	2	2	2	1	#NULL!	1	1	39	2	2	2	2	2	2	2	2	2	2	2
2	1	2004-01-06	15	2	2	2	0	4	1	1	1	1	2	2	2	2	1	1	45	2	2	2	2	2	2	2	2	2	2	2	2	2	2	1	#NULL!	1	1	49	2	2	2	2	2	2	2	2	2	2	2
2	5	2003-10-05	16	2	2	2	1	4	1	1	2	1	2	2	2	2	1	1	39	2	2	2	2	2	2	2	2	2	2	1	2	2	2	2	#NULL!	1	1	39	2	2	2	1	2	2	2	2	2	2	1
2	1	2004-10-07	15	3	2	2	1	1	1	2	2	2	2	2	2	2	1	1	46	2	2	2	2	2	2	2	2	2	2	2	2	2	1	2	#NULL!	1	1	39	2	2	2	2	2	2	2	2	2	2	2
1	3	2002-11-27	17	3	2	2	0	3	1	1	2	1	2	2	2	2	1	1	40	2	2	2	2	2	2	2	2	2	2	2	2	2	1	2	#NULL!	1	1	40	1	2	2	2	2	2	2	2	2	2	2
1	1	2005-04-23	14	2	2	2	0	3	1	1	2	1	2	2	2	2	1	1	45	2	2	2	2	2	2	2	2	2	2	2	2	2	1	2	#NULL!	1	1	42	2	2	2	2	2	2	2	2	2	2	2
2	3	2003-10-18	16	3	2	2	1	3	1	1	2	1	2	2	2	2	1	1	43	4	2	2	1	2	2	2	2	2	2	2	2	2	2	2	#NULL!	1	1	40	3	2	2	2	2	2	2	2	2	2	2
2	3	2004-04-23	15	3	2	2	0	3	1	1	2	1	2	2	2	2	1	1	46	1	1	2	2	2	2	2	2	2	2	2	2	2	2	2	#NULL!	1	1	47	2	2	2	2	2	2	2	2	2	2	2
2	5	2007-01-19	12	2	2	2	0	2	2	2	2	2	2	1	2	2	1	1	47	2	2	2	2	2	2	1	2	2	2	2	2	2	2	2	#NULL!	1	1	49	1	2	2	2	2	2	2	2	2	2	2
2	1	2007-03-26	12	2	2	2	0	4	1	2	2	1	2	2	2	1	1	1	36	3	2	2	2	2	2	2	2	2	2	2	2	2	2	1	#NULL!	1	1	35	5	2	2	2	2	2	2	2	2	2	2
1	1	2007-05-21	12	2	2	2	0	5	1	1	1	1	2	2	2	2	1	2	#NULL!	3	2	2	2	2	2	2	2	2	2	2	2	2	2	1	#NULL!	1	2	#NULL!	3	2	2	2	2	2	2	2	2	2	2
2	3	2002-09-10	17	3	2	1	0	2	1	1	2	2	2	2	2	2	1	1	39	5	2	2	2	2	2	2	2	2	2	2	2	2	2	1	#NULL!	1	1	38	3	2	2	2	2	2	2	2	2	2	2
2	1	2003-11-11	16	3	2	2	3	4	1	1	1	1	2	2	2	2	1	1	42	2	2	2	2	2	2	2	2	2	2	1	2	2	2	2	#NULL!	1	1	37	2	2	2	2	2	2	2	2	2	2	1
1	6	2002-11-23	17	3	2	2	1	3	1	1	2	1	2	2	2	2	1	1	57	3	2	2	2	2	2	2	2	2	2	2	2	2	2	1	#NULL!	1	2	#NULL!	3	2	2	2	2	2	2	2	2	2	2
1	1	2002-11-19	17	3	2	2	0	3	1	1	2	1	2	2	2	2	1	1	45	1	2	2	2	2	2	2	2	2	2	2	2	2	2	1	#NULL!	1	1	45	1	2	2	1	2	2	2	2	2	2	2
1	1	2003-04-14	16	3	2	1	1	3	1	1	1	2	2	2	2	2	1	1	41	3	2	2	2	2	2	2	2	2	2	2	2	2	2	1	#NULL!	1	1	40	2	2	2	2	2	2	2	2	2	2	2
2	1	2002-10-17	17	3	2	2	0	2	1	1	2	2	2	2	2	2	1	1	60	2	2	2	2	2	2	2	2	2	2	1	2	2	1	2	#NULL!	1	1	57	1	2	2	1	2	1	2	2	2	2	1
1	3	2006-10-29	13	2	1	2	0	5	1	1	2	1	2	2	2	1	1	1	36	4	2	2	2	2	2	2	2	2	2	2	2	2	2	1	#NULL!	1	1	34	3	2	2	2	2	2	2	2	2	2	2
1	6	2006-12-24	12	2	2	2	0	5	1	1	1	1	2	2	2	2	1	1	33	3	2	2	2	2	2	2	2	2	2	2	2	2	2	1	#NULL!	1	1	33	2	2	2	2	2	2	2	2	2	2	2
1	1	2006-08-07	13	2	2	2	3	3	2	2	2	2	1	1	2	2	1	1	40	2	2	2	2	2	2	2	2	2	2	2	2	2	2	1	#NULL!	1	1	40	1	2	2	2	2	2	2	2	2	2	2
1	6	2004-11-09	15	2	2	2	0	5	1	1	1	1	2	2	2	2	1	1	36	2	2	2	2	2	2	2	2	2	2	2	2	2	2	1	#NULL!	1	1	36	2	2	2	2	2	2	2	2	2	2	2
2	3	2005-04-21	14	2	2	2	0	10	1	1	2	1	2	2	2	2	1	1	45	3	2	2	2	2	2	1	2	2	2	2	2	2	2	2	#NULL!	1	2	#NULL!	2	2	2	2	2	2	2	2	2	2	1
1	1	2006-11-15	13	2	2	2	0	4	1	1	1	1	2	2	2	2	1	1	38	1	2	2	2	2	2	2	2	2	2	2	2	2	2	1	#NULL!	1	1	33	3	2	2	2	2	2	2	2	2	2	2
1	6	2003-07-19	16	3	2	2	1	3	1	1	1	2	2	2	2	2	1	1	43	4	2	2	2	2	2	2	2	2	2	2	2	2	2	1	#NULL!	1	1	43	4	2	2	2	2	2	2	2	2	2	2
1	1	2002-11-06	17	3	2	1	2	4	2	1	2	2	1	1	2	2	1	1	48	3	2	2	2	2	2	2	2	2	2	2	2	2	2	1	#NULL!	1	2	#NULL!	4	2	2	2	2	2	2	2	2	2	2
1	6	2002-06-21	17	3	1	1	0	2	1	1	2	2	2	2	2	2	1	1	55	5	2	2	2	2	2	2	2	2	2	2	2	2	2	1	#NULL!	1	1	44	5	2	2	2	2	2	2	2	2	2	2
2	1	2005-09-17	14	2	2	2	0	2	1	1	2	2	2	2	2	2	1	1	45	3	2	2	2	2	2	2	2	2	2	2	2	2	2	1	#NULL!	1	1	43	2	2	2	2	2	2	2	2	2	2	2
1	1	2006-08-18	13	2	1	2	0	5	1	1	1	1	2	2	2	2	1	1	39	3	2	2	2	2	2	2	2	2	2	2	2	2	2	1	#NULL!	1	1	35	3	2	2	2	2	2	2	2	2	2	2
2	3	2003-11-16	16	3	2	2	0	3	2	2	2	1	2	2	2	1	1	1	40	3	2	2	2	2	2	2	2	2	2	2	2	2	2	1	#NULL!	1	1	38	3	2	2	2	2	2	2	2	2	2	2
2	6	2003-07-10	16	3	2	2	0	4	1	1	2	1	2	2	2	2	1	1	40	3	2	2	2	2	2	2	2	2	2	2	2	2	2	1	#NULL!	2	#NULL!	#NULL!	#NULL!	#NULL!	#NULL!	#NULL!	#NULL!	#NULL!	#NULL!	#NULL!	#NULL!	#NULL!	#NULL!
2	1	2003-04-02	16	3	2	2	0	4	1	1	2	1	2	2	2	2	1	2	#NULL!	2	2	2	1	2	2	2	2	2	2	2	2	2	2	2	#NULL!	1	2	#NULL!	2	2	2	2	2	2	2	2	2	2	2
2	1	2004-12-14	14	3	2	2	0	5	1	1	2	1	2	2	2	2	1	2	#NULL!	2	2	2	2	2	2	2	2	2	2	2	2	2	2	1	#NULL!	1	2	#NULL!	2	2	2	2	2	2	2	2	2	2	2
2	1	2003-06-02	16	3	2	2	1	5	1	1	1	1	2	2	2	2	1	2	#NULL!	2	2	2	2	2	2	2	2	2	2	2	2	2	2	1	#NULL!	1	2	#NULL!	2	2	2	2	2	2	2	2	2	2	2
2	3	2005-04-16	14	2	2	2	0	3	1	1	2	1	2	2	2	2	1	1	41	2	2	2	2	2	1	1	2	2	2	2	2	2	2	2	#NULL!	1	1	39	3	2	2	2	2	2	2	2	2	2	1
2	6	2007-01-28	12	2	2	2	0	5	1	1	2	1	2	2	2	1	1	2	#NULL!	0	2	2	2	2	2	2	2	2	2	2	2	2	2	1	#NULL!	1	1	38	2	2	2	2	2	2	2	2	2	2	2
2	6	2006-06-02	13	2	2	2	0	3	1	1	2	1	2	2	2	2	1	2	#NULL!	3	2	2	2	2	2	2	2	2	2	2	2	2	2	1	#NULL!	1	2	#NULL!	3	2	2	2	2	2	2	2	2	2	2
2	1	2004-09-02	15	2	2	2	0	3	1	1	2	1	2	2	2	2	1	1	45	2	2	2	2	2	2	2	2	2	2	2	2	2	2	1	#NULL!	1	1	36	2	2	2	2	2	2	2	2	2	2	2
2	1	2006-10-04	13	2	2	2	0	5	1	1	2	1	2	2	2	1	1	1	44	3	1	2	2	2	2	2	2	2	2	2	2	2	2	2	#NULL!	1	1	36	3	2	2	2	2	2	2	2	2	2	2
2	1	2003-11-02	16	3	2	2	0	4	1	1	1	1	2	2	2	2	1	1	48	2	2	2	2	2	2	2	2	2	2	1	2	2	2	2	#NULL!	1	1	51	2	2	2	2	2	2	2	2	2	2	2
2	1	2003-12-16	15	3	2	2	0	3	1	1	2	1	2	2	2	2	1	2	#NULL!	2	2	2	2	2	2	2	2	2	2	2	2	2	1	2	#NULL!	1	2	#NULL!	2	2	2	2	2	2	2	2	2	2	2
2	1	2002-07-07	17	3	2	2	0	2	1	1	2	2	2	2	2	2	1	1	68	4	2	2	2	2	2	2	2	2	2	2	2	2	2	1	#NULL!	1	1	49	2	2	2	2	2	2	2	2	2	2	2
2	6	2007-01-31	12	2	2	2	0	3	1	1	2	1	2	2	2	2	1	1	45	2	2	2	2	2	2	2	2	2	2	2	2	2	2	1	#NULL!	1	1	40	3	2	2	2	2	2	2	2	2	2	2
2	1	2003-09-05	16	3	2	2	0	6	1	1	1	1	1	2	2	2	1	1	39	2	2	2	2	2	2	2	2	2	2	2	2	2	2	1	#NULL!	1	1	37	3	2	2	2	2	2	2	2	2	2	2
2	1	2003-11-24	16	3	2	1	0	2	1	1	2	2	2	2	2	2	1	1	44	2	2	2	2	2	2	2	2	2	2	1	2	2	2	2	#NULL!	1	1	46	1	2	2	1	2	2	2	2	2	2	1
2	1	2003-10-07	16	3	2	1	1	1	2	2	1	2	2	2	2	2	1	1	40	3	2	2	2	2	2	2	2	2	2	2	2	2	2	1	#NULL!	1	1	40	3	2	2	2	2	2	2	2	2	2	2
2	1	2002-09-09	17	3	2	2	0	4	1	1	1	1	2	2	2	2	1	1	40	3	2	2	2	2	2	2	2	2	2	2	2	2	2	1	#NULL!	1	1	39	2	2	2	2	2	2	2	2	2	2	2
2	5	2002-05-07	17	3	2	2	0	3	1	1	2	1	2	2	2	2	1	1	45	2	2	2	2	2	2	2	2	2	2	2	2	2	2	1	#NULL!	1	1	39	3	2	2	2	2	2	2	2	2	2	2
2	1	2003-09-18	16	3	2	2	1	3	1	1	2	2	2	2	2	2	1	1	43	3	1	2	2	2	2	2	2	2	2	2	2	2	2	2	#NULL!	1	1	42	2	2	2	2	2	2	2	2	2	2	2
2	1	2003-03-13	16	3	2	2	0	5	1	1	1	1	1	2	2	2	1	1	39	3	2	2	2	2	2	2	2	2	2	2	2	2	1	2	#NULL!	1	1	36	2	2	2	2	2	2	2	2	2	2	2
2	1	2006-06-18	13	2	2	2	0	6	1	1	1	1	2	2	2	2	1	1	42	4	2	2	2	2	2	2	2	2	2	2	2	2	2	1	#NULL!	1	1	39	3	2	2	2	2	2	2	2	2	2	2
2	1	2005-12-06	13	2	2	2	0	3	1	1	2	1	2	2	2	2	1	1	48	1	2	2	2	2	2	2	2	2	2	2	2	2	2	1	#NULL!	1	1	44	1	2	2	2	2	2	2	2	2	2	2
1	1	2006-10-07	13	2	2	2	0	6	1	1	1	1	1	2	2	2	1	2	#NULL!	3	2	2	2	2	2	2	2	2	2	2	2	2	2	1	#NULL!	1	2	#NULL!	2	2	2	2	2	2	2	2	2	2	2
1	3	2003-12-01	16	3	2	1	0	2	1	1	2	2	2	2	2	2	1	1	38	2	2	2	2	2	2	2	2	2	2	2	2	2	1	2	#NULL!	1	1	36	2	2	2	2	2	2	2	2	2	2	2
2	2	2006-10-08	13	2	2	1	0	2	1	1	2	2	2	2	2	2	1	1	44	3	2	2	1	2	2	2	2	2	2	2	2	2	2	2	#NULL!	1	1	37	3	2	2	2	2	2	2	2	2	2	2
1	1	2007-01-26	12	2	2	2	0	5	1	1	2	1	2	2	2	2	1	1	46	3	2	1	2	2	2	2	2	2	2	2	2	2	2	2	#NULL!	1	1	52	3	2	2	2	2	2	2	2	2	2	2
2	1	2004-02-10	15	3	2	2	0	2	1	2	2	1	2	2	2	2	2	#NULL!	#NULL!	#NULL!	#NULL!	#NULL!	#NULL!	#NULL!	#NULL!	#NULL!	#NULL!	#NULL!	#NULL!	#NULL!	#NULL!	#NULL!	#NULL!	#NULL!	12	1	1	36	2	2	2	2	2	2	2	2	2	2	2
2	1	2003-02-03	16	3	2	2	0	2	1	1	2	2	2	2	2	2	1	1	51	3	2	2	2	2	2	2	2	2	2	1	2	2	2	2	#NULL!	1	1	51	1	2	2	1	1	2	2	2	2	2	2
2	1	2005-06-04	14	2	2	2	0	6	1	1	2	1	2	2	2	2	1	1	42	3	2	2	2	2	2	2	2	2	2	2	2	2	1	2	#NULL!	1	1	37	2	2	2	2	2	2	2	2	2	2	2
2	6	2002-01-28	17	3	2	2	0	2	2	2	1	2	2	2	2	2	1	2	#NULL!	3	2	2	2	2	2	2	2	2	2	2	2	2	2	1	#NULL!	1	1	32	2	2	2	2	2	2	2	2	2	2	1
1	1	2004-03-19	15	3	2	2	0	2	1	2	2	1	2	2	2	2	1	1	38	3	2	2	2	2	2	2	2	2	2	2	2	2	2	1	#NULL!	1	1	37	3	2	2	2	2	2	2	2	2	2	2
2	3	2003-07-24	16	3	2	2	0	3	1	1	2	1	2	2	2	2	1	1	42	1	2	2	2	2	2	2	2	2	2	2	2	2	2	1	#NULL!	1	1	41	2	2	2	2	2	2	1	2	2	2	2
2	1	2006-10-20	13	2	1	2	0	3	2	2	1	1	2	2	2	2	1	1	40	2	2	2	2	2	2	2	2	2	2	2	2	2	2	1	#NULL!	1	1	34	3	2	2	2	2	2	2	2	2	2	2
2	1	2007-06-16	12	2	2	1	0	2	1	1	2	2	2	2	2	2	1	1	45	0	2	2	2	2	2	2	2	2	2	2	2	2	2	1	#NULL!	1	1	49	0	2	2	2	2	2	2	2	2	2	2
1	1	2006-07-07	13	2	2	2	0	1	1	2	2	2	2	2	2	2	2	#NULL!	#NULL!	#NULL!	#NULL!	#NULL!	#NULL!	#NULL!	#NULL!	#NULL!	#NULL!	#NULL!	#NULL!	#NULL!	#NULL!	#NULL!	#NULL!	#NULL!	4	1	1	39	3	2	2	2	2	2	2	2	2	2	2
1	1	2006-09-23	13	2	2	2	0	2	1	1	2	2	2	2	2	2	1	1	41	2	2	2	1	2	2	2	2	2	2	2	2	2	2	2	#NULL!	1	1	43	3	2	2	2	2	2	2	2	2	2	2
1	6	2007-07-06	12	2	2	1	0	3	2	1	1	2	2	2	2	2	1	2	#NULL!	2	2	2	2	2	2	2	2	2	2	2	2	2	2	1	#NULL!	1	2	#NULL!	3	2	2	2	2	2	2	2	2	2	2
2	1	2004-09-22	15	2	2	2	0	1	2	1	2	2	2	2	2	2	1	1	46	2	2	2	2	2	2	2	2	2	2	2	2	2	1	2	#NULL!	1	2	#NULL!	2	2	2	2	2	2	2	2	2	2	2
1	6	2005-05-14	14	2	2	2	0	7	1	1	1	1	2	2	2	2	1	1	35	3	2	2	2	2	2	2	2	2	2	2	2	2	2	1	#NULL!	1	1	34	4	2	2	2	2	2	2	2	2	2	2
2	1	2005-10-27	14	2	1	1	1	1	1	2	2	2	2	2	2	2	1	1	48	3	2	2	2	2	2	2	2	2	2	2	2	2	2	1	#NULL!	1	1	38	3	2	2	2	2	2	2	2	2	2	2
2	1	2006-01-20	13	2	2	2	0	4	1	1	1	1	2	2	2	2	1	1	40	3	2	2	2	2	2	2	2	2	2	2	2	2	2	1	#NULL!	1	1	39	3	2	2	2	2	2	2	2	2	2	2
2	3	2003-01-27	16	3	2	2	0	5	1	2	2	1	2	2	2	2	1	1	43	3	2	2	2	2	2	2	2	2	2	2	2	2	2	1	#NULL!	1	1	40	2	2	2	2	2	2	2	2	2	2	2
2	1	2003-11-12	16	3	2	2	0	4	1	1	1	2	2	2	2	2	1	1	41	2	2	2	2	2	2	2	2	2	2	2	2	2	2	1	#NULL!	1	1	39	1	2	2	2	2	2	2	2	2	2	2
1	3	2002-06-16	17	3	2	2	3	3	1	1	2	1	2	2	2	2	1	2	#NULL!	3	2	2	2	2	2	2	2	2	2	2	2	2	2	1	#NULL!	1	2	#NULL!	4	2	2	2	2	2	2	2	2	2	2
2	3	2007-01-03	12	2	2	2	0	3	1	1	2	1	2	2	2	2	1	2	#NULL!	4	2	2	2	2	2	2	2	2	2	2	2	2	2	1	#NULL!	1	2	#NULL!	2	2	2	2	2	2	2	2	2	2	2
2	1	2006-10-17	13	2	2	2	0	3	1	1	2	2	2	2	2	2	1	2	#NULL!	3	2	2	2	2	2	2	2	2	2	2	2	2	1	2	#NULL!	1	2	#NULL!	4	2	2	2	2	2	2	2	2	2	2
2	1	2004-04-01	15	3	2	2	2	2	2	2	1	1	2	2	2	2	1	1	45	4	2	2	2	2	2	2	2	2	2	2	2	2	2	1	#NULL!	1	1	39	4	2	2	2	2	2	2	2	2	2	2
1	1	2002-12-03	17	3	2	2	0	5	1	1	1	1	2	2	2	2	1	1	41	2	2	2	2	2	2	2	2	2	2	2	2	2	1	2	#NULL!	1	1	42	2	2	2	2	2	2	2	2	2	2	2
2	1	2003-10-29	16	3	2	2	0	5	1	1	1	1	2	2	2	2	1	1	41	2	2	2	2	2	2	2	2	2	2	2	2	2	2	1	#NULL!	1	1	40	1	2	2	2	2	2	2	2	1	2	2
2	1	2003-04-19	16	3	2	2	0	5	1	1	1	1	2	2	2	2	1	1	44	2	2	2	2	2	2	2	2	2	2	2	2	2	2	1	#NULL!	1	1	42	2	2	2	2	2	2	2	2	2	2	2
1	6	2003-04-18	16	3	1	2	0	4	1	1	1	1	2	2	2	2	1	2	#NULL!	2	2	2	2	2	2	2	2	2	2	2	2	2	2	1	#NULL!	1	2	#NULL!	2	2	2	2	2	2	2	2	2	2	1
1	3	2003-04-18	16	3	2	2	0	8	2	2	2	2	2	2	2	1	1	2	#NULL!	3	2	2	2	2	2	2	2	2	2	2	2	2	2	1	#NULL!	1	1	36	3	2	2	2	2	2	2	2	2	2	2
2	1	2004-10-31	15	2	2	2	0	5	1	1	1	1	2	2	2	2	1	1	40	4	2	2	2	2	2	2	2	2	2	2	2	2	2	1	#NULL!	1	1	39	1	2	2	2	2	2	2	2	2	2	2
2	5	2006-05-07	13	2	2	2	0	4	2	2	1	2	1	2	2	1	1	2	#NULL!	1	2	2	2	2	2	2	2	2	2	2	2	2	2	1	#NULL!	1	2	#NULL!	2	2	2	2	2	2	2	2	2	2	2
2	1	2006-03-29	13	2	2	2	0	5	1	2	2	2	1	1	2	2	1	1	37	3	2	2	2	2	2	2	2	2	2	2	2	2	1	2	#NULL!	1	1	36	3	2	1	2	2	2	2	2	2	2	2
1	1	2007-04-06	12	2	1	2	0	3	1	1	2	1	2	2	2	2	1	1	36	1	2	2	2	2	2	2	2	2	2	2	2	2	2	1	#NULL!	1	1	34	1	2	2	2	2	2	2	2	2	2	2
1	5	2006-09-20	13	2	2	1	0	2	2	2	1	2	2	2	2	2	2	#NULL!	#NULL!	#NULL!	#NULL!	#NULL!	#NULL!	#NULL!	#NULL!	#NULL!	#NULL!	#NULL!	#NULL!	#NULL!	#NULL!	#NULL!	#NULL!	#NULL!	1	1	1	29	2	2	2	2	2	2	2	2	2	2	2
2	1	2006-04-16	13	2	1	2	0	2	1	1	2	2	2	2	2	2	1	1	31	3	2	2	2	2	2	2	2	2	2	2	2	2	2	1	#NULL!	1	1	30	2	2	2	2	2	2	2	2	2	2	2
2	1	2003-03-18	16	3	2	2	0	3	1	1	2	1	2	2	2	2	1	1	44	1	2	2	2	2	2	2	2	2	2	2	2	2	1	2	#NULL!	1	1	42	1	2	2	2	2	2	2	2	2	2	2
1	1	2003-01-29	16	3	2	2	1	3	1	1	2	1	2	2	2	2	1	1	43	3	2	2	2	2	2	2	2	2	2	1	2	2	2	2	#NULL!	1	1	42	2	2	2	1	2	2	2	2	2	2	2
2	1	2006-01-02	13	2	2	1	0	2	1	1	2	2	2	2	2	2	1	1	45	5	2	2	2	2	2	2	2	2	2	2	2	2	2	1	#NULL!	1	1	40	2	2	2	2	2	2	2	2	2	2	2
1	1	2003-07-03	16	3	2	1	1	1	1	2	2	2	2	2	2	2	2	#NULL!	#NULL!	#NULL!	#NULL!	#NULL!	#NULL!	#NULL!	#NULL!	#NULL!	#NULL!	#NULL!	#NULL!	#NULL!	#NULL!	#NULL!	#NULL!	#NULL!	13	1	1	56	2	2	2	2	2	2	2	2	2	2	2
2	1	2003-01-09	16	3	2	1	0	2	1	2	1	2	2	2	2	2	1	2	#NULL!	0	2	2	2	2	2	2	2	2	2	2	2	2	2	1	#NULL!	1	1	47	3	2	2	1	2	2	2	2	2	2	2
1	1	2003-10-04	16	3	2	2	0	3	1	1	2	1	2	2	2	2	1	1	39	2	2	2	2	2	2	2	2	2	2	2	2	2	1	2	#NULL!	1	1	40	2	2	2	2	2	2	2	2	2	2	2
1	1	2007-06-28	12	2	1	1	0	2	1	1	2	2	2	2	2	2	1	2	#NULL!	3	2	2	2	2	2	2	2	2	2	2	2	2	2	1	#NULL!	1	2	#NULL!	3	2	2	2	2	2	2	2	2	2	2
1	1	2004-07-26	15	2	2	2	1	3	1	1	2	1	2	2	2	2	1	1	43	3	2	2	2	2	2	2	2	2	2	2	2	2	2	1	#NULL!	1	1	39	2	2	2	2	2	2	2	2	2	2	2
1	1	2005-11-03	14	2	1	2	0	4	1	2	2	1	2	2	2	2	2	#NULL!	#NULL!	#NULL!	#NULL!	#NULL!	#NULL!	#NULL!	#NULL!	#NULL!	#NULL!	#NULL!	#NULL!	#NULL!	#NULL!	#NULL!	#NULL!	#NULL!	9	1	2	#NULL!	4	2	2	2	2	2	2	2	2	2	2
2	1	2004-02-08	15	3	2	1	0	2	2	2	1	2	2	2	2	2	1	1	41	2	2	2	2	2	2	2	2	2	2	2	2	2	2	1	#NULL!	1	1	37	4	2	2	2	2	2	2	2	2	2	2
2	1	2007-07-03	12	2	2	2	0	4	1	1	2	1	2	2	2	2	1	1	41	3	2	2	2	2	2	2	2	2	2	2	2	2	2	1	#NULL!	1	1	37	3	2	2	2	2	2	2	2	2	2	2
2	1	2007-02-01	12	2	1	1	0	2	2	1	1	2	2	2	2	2	1	1	44	2	2	2	2	2	2	2	2	2	2	2	2	2	2	1	#NULL!	1	1	37	2	2	2	2	2	2	2	2	2	2	2
2	1	2006-10-05	13	2	2	2	0	2	2	2	2	1	2	1	2	2	1	1	45	2	1	2	1	2	2	2	2	2	2	1	2	2	2	2	#NULL!	1	2	#NULL!	0	2	2	2	2	2	2	2	2	2	2
1	1	2006-01-23	13	2	2	2	0	6	1	1	1	1	2	2	2	2	1	1	47	3	2	2	2	2	2	2	2	2	2	2	2	2	2	1	#NULL!	1	1	44	2	2	2	2	2	2	2	2	2	2	2
1	6	2005-09-23	14	2	1	2	0	5	1	1	2	1	2	2	2	2	1	2	#NULL!	3	2	2	2	2	2	2	2	2	2	2	2	2	2	1	#NULL!	1	2	#NULL!	2	2	2	2	2	2	2	2	2	2	2
1	1	2006-03-01	13	2	2	1	1	1	1	2	2	2	2	2	2	2	1	2	#NULL!	3	1	2	2	2	2	2	2	2	2	2	2	2	2	2	#NULL!	1	2	#NULL!	3	2	2	2	2	2	2	2	2	2	2
1	1	2006-07-31	13	2	2	2	0	3	1	1	2	1	2	2	2	2	1	2	#NULL!	2	2	2	2	2	2	2	2	2	2	2	2	2	2	1	#NULL!	1	2	#NULL!	1	2	2	2	2	2	2	2	2	2	2
1	3	2004-02-29	15	3	2	1	0	2	2	2	1	2	2	2	2	2	1	1	42	2	2	2	2	2	2	2	2	2	2	2	2	2	2	1	#NULL!	1	1	40	1	2	2	2	2	2	2	2	2	2	2
1	3	2005-04-10	14	3	2	2	3	3	1	1	2	1	2	2	2	2	1	1	38	2	2	2	2	2	2	2	2	2	2	2	2	2	2	1	#NULL!	1	1	38	2	2	2	2	2	2	2	2	2	2	2
2	4	2004-07-31	15	3	2	1	0	2	1	1	2	2	2	2	2	2	1	1	47	5	2	2	1	2	2	2	2	2	2	2	2	2	2	2	#NULL!	1	1	41	5	2	2	1	2	2	2	2	2	2	2
1	1	2003-09-12	16	3	2	2	3	4	1	1	2	2	2	2	2	2	1	1	45	2	2	2	2	2	2	2	2	2	2	2	2	2	2	1	#NULL!	1	1	46	2	2	2	2	2	2	2	2	2	2	2
2	1	2006-03-31	13	2	2	2	1	3	2	1	2	1	1	1	2	2	1	1	36	3	2	2	2	2	2	2	2	2	2	2	2	2	2	1	#NULL!	1	1	32	3	2	2	2	2	2	2	2	2	2	2
2	3	2002-04-10	17	3	2	2	0	8	2	2	2	2	2	2	2	1	1	1	43	3	2	2	1	2	2	2	2	2	2	2	2	2	1	2	#NULL!	1	1	41	2	1	2	2	2	2	2	2	2	2	2
2	1	2005-10-07	14	2	2	2	0	4	2	2	2	2	2	1	2	2	1	1	38	3	2	2	2	2	2	2	2	2	2	2	2	2	2	1	#NULL!	1	1	34	2	2	2	2	2	2	2	2	2	2	2
1	3	2006-06-12	13	2	2	2	1	2	1	2	2	1	2	2	2	2	1	1	40	2	2	2	2	2	2	2	2	2	2	2	2	2	2	1	#NULL!	1	1	35	2	2	2	2	2	2	2	2	2	2	2
1	1	2004-07-08	15	3	2	2	0	3	1	1	2	1	2	2	2	2	1	1	43	3	2	2	2	2	2	2	2	2	2	2	2	2	2	1	#NULL!	1	1	37	3	2	2	2	2	2	2	2	2	2	2
2	1	2007-08-14	12	2	2	2	0	2	1	2	2	1	2	2	2	2	1	2	#NULL!	3	2	2	2	2	2	2	2	2	2	2	2	2	2	1	#NULL!	1	2	#NULL!	3	2	2	2	2	2	2	2	2	2	2
1	1	2007-03-16	12	2	2	2	0	3	1	1	2	1	2	2	2	2	1	1	39	2	2	2	2	2	2	2	2	2	2	2	2	2	2	1	#NULL!	1	1	38	1	2	2	1	2	2	2	2	2	2	2
2	1	2006-01-22	13	2	2	2	0	4	1	1	1	1	2	2	2	2	1	1	46	2	2	2	2	2	2	2	2	2	2	2	2	2	2	1	#NULL!	1	1	42	3	2	2	2	2	2	2	2	2	2	2
2	1	2006-08-10	13	2	2	2	0	3	2	1	1	2	2	2	2	2	1	1	42	3	2	2	2	2	2	2	2	2	2	2	2	2	2	1	#NULL!	1	2	#NULL!	0	2	2	2	2	2	2	2	2	2	2
2	2	2007-08-16	12	2	2	1	0	5	1	1	2	2	2	2	1	2	1	1	39	4	2	2	2	2	2	2	2	2	2	2	2	2	1	2	#NULL!	1	1	39	4	2	2	2	2	2	2	2	2	2	2
2	6	2002-11-21	17	3	2	2	0	6	1	1	2	1	1	2	2	2	1	1	40	3	2	2	2	2	2	2	2	2	2	2	2	2	2	1	#NULL!	1	1	38	3	2	2	2	2	2	2	2	2	2	1
1	6	2004-09-13	15	2	2	2	0	3	1	1	2	1	2	2	2	2	1	1	39	1	2	2	2	2	2	2	2	2	2	2	2	2	2	1	#NULL!	1	1	36	1	2	2	2	2	2	2	2	2	2	2
1	1	2004-09-15	15	2	2	2	1	5	2	2	1	2	2	2	2	2	1	1	42	2	2	2	2	2	2	2	2	2	2	2	2	2	2	1	#NULL!	1	1	43	2	2	2	2	2	2	2	2	2	2	2
1	3	2002-08-15	17	3	2	1	0	2	1	1	2	2	2	2	2	2	1	1	40	3	2	2	2	2	2	2	2	2	2	2	2	2	2	1	#NULL!	1	1	37	4	2	2	2	2	2	2	2	2	2	2
2	1	2004-04-15	15	2	2	2	0	4	1	1	1	1	2	2	2	2	1	1	45	3	2	2	2	2	2	2	2	2	2	2	2	2	2	1	#NULL!	1	1	45	2	2	2	2	2	2	2	2	2	2	2
2	1	2003-10-07	16	3	2	2	1	2	2	1	2	1	2	2	2	2	1	1	39	0	2	2	2	2	2	2	2	2	2	2	2	2	2	1	#NULL!	1	2	#NULL!	0	2	2	2	2	2	2	2	2	2	2
2	1	2003-09-03	16	3	2	2	0	4	1	1	2	1	2	2	2	2	1	1	49	2	2	2	2	2	2	2	2	2	2	2	2	2	2	1	#NULL!	1	1	41	3	2	2	2	2	2	2	2	2	2	2
2	1	2002-11-03	17	3	2	2	0	0	2	2	1	2	2	2	2	2	2	#NULL!	#NULL!	#NULL!	#NULL!	#NULL!	#NULL!	#NULL!	#NULL!	#NULL!	#NULL!	#NULL!	#NULL!	#NULL!	#NULL!	#NULL!	#NULL!	#NULL!	13	1	1	45	2	2	2	1	2	2	2	2	2	2	2
2	1	2002-06-20	17	3	2	2	0	3	1	1	2	1	2	2	2	2	1	1	41	2	2	2	2	2	2	2	2	2	2	2	2	2	1	2	#NULL!	1	1	36	2	2	2	2	2	2	2	2	2	2	2
1	6	2004-07-28	15	3	2	2	0	3	1	1	2	1	2	2	2	2	1	1	42	2	2	2	2	2	2	2	2	2	2	2	2	2	2	1	#NULL!	1	1	39	3	2	2	2	2	2	2	2	2	2	2
2	1	2003-01-14	16	3	2	2	0	4	1	1	1	1	2	2	2	2	1	1	44	2	2	2	2	2	2	2	2	2	2	2	2	2	2	1	#NULL!	1	1	42	1	2	2	2	2	2	2	2	2	2	2
2	1	2004-08-13	15	3	2	2	1	4	1	1	1	1	2	2	2	2	1	1	40	2	2	2	2	2	2	2	2	2	2	1	2	2	1	2	#NULL!	1	1	39	3	2	2	2	2	2	2	2	2	2	1
2	3	2004-11-28	15	3	2	2	0	0	2	2	2	2	2	2	2	1	1	1	40	3	2	2	2	2	2	2	2	2	2	2	2	2	2	1	#NULL!	1	1	39	2	2	2	2	2	2	2	2	2	2	2
1	1	2004-11-22	15	3	2	1	1	3	1	1	2	1	2	2	2	2	1	1	42	5	2	2	2	2	2	2	2	2	2	2	2	2	2	1	#NULL!	1	1	39	5	2	2	2	2	2	2	2	2	2	2
2	1	2003-10-12	16	3	2	2	0	3	1	1	2	1	2	2	2	2	1	1	49	3	2	2	2	2	2	2	2	2	2	2	2	2	2	1	#NULL!	1	1	44	3	2	2	2	2	2	2	2	2	2	2
2	1	2002-10-05	17	3	2	1	0	2	1	1	2	2	2	2	2	2	1	1	50	3	2	2	2	2	2	2	2	2	2	2	2	2	2	1	#NULL!	1	1	40	2	2	2	2	2	2	2	2	2	2	2
1	6	2006-11-03	13	2	2	2	0	5	1	1	1	1	2	1	2	2	1	1	41	0	2	2	2	2	2	2	2	2	2	2	2	2	2	1	#NULL!	1	1	36	0	2	2	2	2	2	2	2	2	2	2
1	1	2007-05-03	12	2	2	1	0	3	2	2	2	1	2	1	2	2	1	1	48	4	2	2	2	2	2	2	2	2	2	2	2	2	2	1	#NULL!	1	1	29	2	2	2	2	2	2	2	2	2	2	2
2	3	2003-08-07	16	3	2	2	0	4	1	1	2	1	2	2	2	2	1	1	37	3	2	2	2	2	1	2	2	2	2	2	2	2	2	2	#NULL!	1	1	36	2	2	2	2	2	2	2	2	2	2	1
1	1	2001-12-12	17	3	2	1	2	2	1	1	2	2	2	2	2	2	1	1	43	3	2	2	2	2	2	2	2	2	2	2	2	2	2	1	#NULL!	1	1	43	2	2	2	2	2	2	2	2	2	2	2
2	5	2002-09-15	17	3	2	2	2	3	1	1	2	1	2	2	2	2	1	1	43	1	2	2	2	2	2	2	2	2	2	2	2	2	2	1	#NULL!	1	1	39	1	2	2	2	2	2	2	2	2	2	2
1	1	2003-06-05	16	3	2	1	0	4	1	1	1	2	2	2	2	2	1	1	44	2	2	2	2	2	2	2	2	2	2	2	2	2	2	1	#NULL!	1	1	38	2	2	2	2	2	2	2	2	2	2	2
1	1	2002-09-12	17	3	2	2	1	4	1	2	2	2	2	2	2	2	2	#NULL!	#NULL!	#NULL!	#NULL!	#NULL!	#NULL!	#NULL!	#NULL!	#NULL!	#NULL!	#NULL!	#NULL!	#NULL!	#NULL!	#NULL!	#NULL!	#NULL!	0	1	1	46	4	2	2	2	2	2	2	2	2	2	2
1	1	2002-02-05	17	3	2	2	0	3	1	2	1	1	2	2	2	2	2	#NULL!	#NULL!	#NULL!	#NULL!	#NULL!	#NULL!	#NULL!	#NULL!	#NULL!	#NULL!	#NULL!	#NULL!	#NULL!	#NULL!	#NULL!	#NULL!	#NULL!	15	1	1	43	2	2	2	2	2	2	2	2	2	2	1
1	3	2003-09-28	16	3	2	2	0	3	1	2	1	2	1	1	2	2	1	1	35	3	2	2	2	2	2	2	2	2	2	2	2	2	2	1	#NULL!	1	1	35	2	2	2	2	2	2	2	2	2	2	2
1	5	2004-02-14	15	3	2	1	0	2	1	1	2	2	2	2	2	2	1	1	43	5	2	2	2	2	2	2	2	2	2	2	2	2	2	1	#NULL!	1	1	45	5	2	2	1	2	2	2	2	2	2	2
1	3	2002-04-26	17	3	2	2	0	3	1	1	2	1	2	2	2	2	1	1	44	0	2	2	2	2	2	2	2	2	2	2	2	2	1	2	#NULL!	1	1	44	0	2	2	2	2	2	2	2	2	2	2
1	1	2003-05-01	16	3	2	2	0	4	1	1	2	2	2	2	2	1	1	2	#NULL!	2	2	2	2	2	2	2	2	2	2	2	2	2	2	1	#NULL!	1	2	#NULL!	2	2	2	2	2	2	2	2	2	2	2
1	1	2003-10-15	16	3	2	2	0	3	1	1	2	1	2	2	2	2	1	1	44	3	2	2	1	2	2	2	2	2	2	2	2	2	2	2	#NULL!	1	1	43	2	2	2	2	2	2	2	2	2	2	2
1	6	2008-06-30	11	2	2	2	0	4	1	1	2	1	2	2	2	2	1	2	#NULL!	4	2	2	2	2	2	2	2	2	2	2	2	2	2	1	#NULL!	1	2	#NULL!	3	2	2	2	2	2	2	2	2	2	2
2	3	2006-04-12	13	2	2	2	0	3	1	1	2	1	2	2	2	2	1	1	32	3	2	2	2	2	2	2	2	2	2	2	2	2	2	1	#NULL!	1	1	33	2	2	2	2	2	2	2	2	2	2	2
1	1	2006-10-20	13	2	2	2	0	4	1	1	1	1	2	2	2	2	1	1	38	3	2	2	2	2	2	2	2	2	2	2	2	2	2	1	#NULL!	1	1	35	3	2	2	2	2	2	2	2	2	2	2
2	1	2006-08-11	13	2	2	2	1	4	1	1	2	1	2	2	2	2	1	1	37	3	2	2	2	2	2	2	2	2	2	2	2	2	2	1	#NULL!	1	1	38	3	2	2	2	2	2	2	2	2	2	2
1	1	2004-07-26	15	2	2	2	1	3	1	1	2	1	2	2	2	2	1	1	43	3	2	2	2	2	2	2	2	2	2	2	2	2	2	1	#NULL!	1	1	39	2	2	2	2	2	2	2	2	2	2	2
1	6	2006-11-16	13	2	2	2	0	5	1	1	1	1	2	2	2	2	1	2	#NULL!	3	2	2	2	2	2	2	2	2	2	2	2	2	2	1	#NULL!	1	2	#NULL!	3	2	2	2	2	2	2	2	2	2	2
1	2	2003-11-19	16	3	1	1	0	2	1	1	2	2	2	2	2	2	1	1	42	4	2	2	2	2	2	2	2	2	2	2	2	2	2	1	#NULL!	1	1	41	5	2	2	2	2	2	2	2	2	2	2
2	6	2006-09-19	13	2	2	1	1	3	2	1	2	2	1	2	2	1	1	1	32	4	2	2	2	2	2	2	2	2	2	2	2	2	2	1	#NULL!	1	2	#NULL!	2	2	2	2	2	2	2	2	2	2	2
2	1	2007-08-11	12	2	1	2	0	5	1	1	2	1	2	2	2	2	1	2	#NULL!	3	2	2	2	2	2	2	2	2	2	2	2	1	2	2	#NULL!	1	2	#NULL!	3	2	2	2	2	2	2	2	2	2	2
1	6	2003-12-06	15	3	2	1	0	2	1	1	2	2	2	2	2	2	1	1	45	5	2	2	2	2	2	2	2	2	2	2	2	2	2	1	#NULL!	1	1	44	5	2	2	2	2	2	2	2	2	2	2
1	6	2002-05-19	17	3	2	2	0	5	1	1	2	1	2	2	2	1	1	1	46	4	2	2	2	2	2	2	2	2	2	2	2	2	2	1	#NULL!	1	1	43	2	2	2	2	2	1	2	2	2	2	2
2	6	2003-02-23	16	3	2	2	1	3	1	2	2	1	2	2	2	2	1	1	44	2	2	2	2	2	2	1	2	2	2	2	2	2	2	2	#NULL!	1	1	33	3	2	2	2	2	2	2	2	2	2	2
2	1	2002-10-08	17	3	2	1	0	2	1	1	2	2	2	2	2	2	1	1	40	3	2	2	2	2	2	2	2	2	2	2	2	2	2	1	#NULL!	1	1	39	2	2	2	2	2	2	2	2	2	2	2
2	1	2004-03-10	15	3	2	2	0	3	1	1	2	1	2	2	2	2	1	1	47	4	2	2	2	2	2	2	2	2	2	2	2	2	2	1	#NULL!	1	1	46	3	2	2	2	2	2	2	2	2	2	2
2	6	2004-07-16	15	3	2	2	0	4	1	1	1	1	2	2	2	2	1	1	40	2	2	2	2	2	2	2	2	2	2	2	2	2	2	1	#NULL!	1	1	36	2	2	2	2	2	2	2	2	2	2	2
2	1	2004-04-29	15	3	2	2	0	2	1	2	2	1	2	2	2	2	1	1	46	3	2	2	2	2	2	2	2	2	2	2	2	2	2	1	#NULL!	1	1	46	2	2	2	2	2	2	2	2	2	2	2
2	1	2004-05-27	15	3	2	2	0	3	1	1	2	1	2	2	2	2	1	1	38	3	2	2	2	2	2	2	2	2	2	2	2	2	2	1	#NULL!	1	1	35	2	2	2	2	2	2	2	2	2	2	2
2	6	2004-09-06	15	3	2	2	0	3	1	2	1	2	2	2	2	2	1	1	39	4	2	2	2	2	2	2	2	2	2	2	2	2	2	1	#NULL!	1	1	37	3	2	2	2	2	2	2	2	2	2	2
1	6	2004-01-09	15	3	2	1	0	3	1	1	2	2	1	2	2	2	1	2	#NULL!	5	2	2	2	2	2	2	2	2	2	2	2	2	2	1	#NULL!	1	2	#NULL!	0	2	2	2	2	2	2	2	2	2	2
2	1	2003-07-13	16	3	2	2	0	3	1	1	2	1	2	2	2	2	1	1	45	3	2	2	2	2	2	2	2	2	2	2	2	2	1	2	#NULL!	1	1	43	0	2	2	2	2	2	2	2	2	2	2
1	1	2005-12-17	13	2	2	2	1	1	2	1	2	2	2	2	2	2	1	1	42	2	2	2	2	2	2	2	2	2	2	2	2	2	2	1	#NULL!	1	1	39	3	2	2	2	2	2	2	2	2	2	2
2	5	2006-07-05	13	2	2	2	1	4	1	1	2	1	2	2	2	2	1	1	32	3	2	2	2	2	2	2	2	2	2	2	2	2	2	1	#NULL!	1	1	36	3	2	2	2	2	2	2	2	2	2	2
2	4	2004-03-17	15	3	2	1	0	2	1	1	2	2	2	2	2	2	1	1	43	5	2	2	2	2	2	2	2	2	2	2	2	2	2	1	#NULL!	1	1	43	4	2	2	2	2	2	2	2	2	2	2
2	1	2007-07-04	12	2	2	2	0	3	1	1	2	1	2	2	2	2	1	1	39	0	2	2	2	2	2	2	2	2	2	2	2	2	2	1	#NULL!	1	1	37	0	2	2	2	2	2	2	2	2	2	2
2	3	2003-10-12	16	3	2	2	2	3	1	1	2	1	2	2	2	2	1	1	43	3	2	2	2	2	2	2	2	2	2	2	2	2	2	1	#NULL!	1	1	41	3	2	2	2	2	2	2	2	2	2	2
2	1	2003-07-26	16	3	2	2	0	2	1	1	2	2	2	2	2	2	1	1	43	1	2	2	2	2	2	1	2	2	2	2	2	2	2	2	#NULL!	1	1	39	1	2	2	2	2	2	2	1	1	2	1
1	3	2003-06-17	16	3	2	2	0	5	1	1	1	1	2	2	2	2	1	2	#NULL!	3	2	2	2	2	2	2	2	2	2	2	2	2	2	1	#NULL!	1	2	#NULL!	3	2	2	2	2	2	2	2	2	2	2
1	1	2003-07-22	16	3	2	2	1	4	1	1	1	1	2	2	2	2	1	1	43	3	2	2	2	2	2	2	2	2	2	2	2	2	2	1	#NULL!	1	1	43	3	2	2	2	2	2	2	2	2	2	2
1	1	2003-07-09	16	3	2	1	0	2	1	1	2	2	2	2	2	2	1	1	44	3	2	2	2	2	2	2	2	2	2	2	2	2	2	1	#NULL!	1	1	45	3	2	2	1	2	2	2	2	2	2	2
2	1	2006-07-19	13	2	2	2	0	3	1	1	2	1	2	2	2	2	1	1	40	3	2	2	2	2	2	2	2	2	2	2	2	2	1	2	#NULL!	1	1	36	2	2	2	2	2	2	2	2	2	2	2
1	1	2004-08-15	15	3	2	2	1	3	1	1	2	1	2	2	2	2	1	1	39	2	2	2	2	2	2	2	2	2	2	2	2	2	2	1	#NULL!	1	1	38	3	2	2	2	2	2	2	2	2	2	2
2	1	2002-12-20	16	3	2	2	0	4	1	1	2	1	2	2	2	2	1	1	45	3	2	2	2	2	2	2	2	2	2	2	2	2	2	1	#NULL!	1	1	48	2	2	2	2	1	2	2	1	2	2	2
1	3	2005-12-26	13	2	2	2	0	5	2	2	2	1	1	1	2	2	1	2	#NULL!	2	2	2	2	2	2	2	2	2	2	2	2	2	2	1	#NULL!	2	#NULL!	#NULL!	#NULL!	#NULL!	#NULL!	#NULL!	#NULL!	#NULL!	#NULL!	#NULL!	#NULL!	#NULL!	#NULL!
2	6	2004-03-28	15	3	2	2	0	0	1	1	2	2	2	2	2	2	1	1	43	1	2	2	2	2	2	2	2	2	2	2	2	2	2	1	#NULL!	1	1	43	1	2	2	2	2	2	2	2	2	2	1
1	1	2004-01-10	15	3	2	2	0	2	1	1	2	2	2	2	2	2	1	1	45	1	2	2	2	2	2	2	2	2	2	2	2	2	2	1	#NULL!	1	1	44	2	2	2	2	2	2	2	2	2	2	2
2	1	2003-10-19	16	3	2	1	0	5	1	1	1	2	2	2	2	2	1	1	42	4	2	2	2	2	2	2	2	2	2	2	2	2	2	1	#NULL!	1	1	37	4	2	2	2	2	2	2	2	2	2	2
2	1	2003-06-05	16	3	2	2	0	3	1	2	1	1	2	2	2	2	1	2	#NULL!	2	1	2	2	2	2	2	2	2	2	2	2	2	2	2	#NULL!	1	2	#NULL!	2	2	2	2	2	2	2	2	2	2	2
2	1	2003-08-23	16	3	2	2	0	5	1	2	1	1	2	2	2	1	1	1	46	3	2	2	2	2	2	2	2	2	2	1	2	2	2	2	#NULL!	1	1	43	3	2	2	2	2	2	2	2	2	2	2
2	1	2002-05-15	17	3	2	2	0	0	2	2	1	2	2	2	2	2	1	1	42	2	2	2	2	2	2	2	2	2	2	2	2	2	1	2	#NULL!	1	1	43	2	2	2	2	2	2	2	2	2	2	2
2	1	2002-07-03	17	3	2	2	0	3	1	1	2	1	2	2	2	2	1	1	44	3	2	2	2	2	2	2	2	2	2	2	2	2	2	1	#NULL!	1	1	42	2	2	2	2	2	2	2	2	2	2	2
1	1	2006-05-02	13	2	2	2	2	2	2	2	2	2	2	2	2	1	1	1	54	1	2	2	2	2	2	2	2	2	2	2	2	2	2	1	#NULL!	2	#NULL!	#NULL!	#NULL!	#NULL!	#NULL!	#NULL!	#NULL!	#NULL!	#NULL!	#NULL!	#NULL!	#NULL!	#NULL!
1	6	2002-06-11	17	3	1	2	0	3	1	1	2	1	2	2	2	2	1	1	43	2	2	2	2	2	2	2	2	2	2	1	2	2	2	2	#NULL!	1	1	42	1	2	2	2	2	2	2	2	2	2	2
1	1	2002-03-08	17	3	2	2	0	3	1	1	2	1	2	2	2	2	1	1	42	2	2	2	2	2	2	2	2	2	2	2	2	2	2	1	#NULL!	1	1	34	2	2	2	2	2	2	2	2	2	2	2
1	1	2003-04-01	16	3	2	2	0	3	1	1	2	1	2	2	2	2	1	1	46	2	2	2	2	2	2	2	2	2	2	2	2	2	2	1	#NULL!	1	1	39	2	2	2	2	2	2	2	2	2	2	2
2	1	2006-08-03	13	2	2	2	3	3	2	2	1	1	2	2	2	2	1	2	#NULL!	3	2	2	2	2	2	2	2	2	2	2	2	2	1	2	#NULL!	1	2	#NULL!	2	2	2	2	2	2	2	2	2	2	2
2	1	2007-01-26	12	2	2	2	0	6	1	1	1	2	2	2	2	2	1	1	40	0	2	2	2	2	2	2	2	2	2	2	2	2	2	1	#NULL!	1	1	35	0	2	2	2	2	2	2	2	2	2	2
1	5	2004-01-01	15	3	2	2	2	3	2	2	1	1	2	2	2	2	1	1	41	4	2	2	2	2	2	2	2	2	2	2	2	2	2	1	#NULL!	1	1	40	1	2	2	2	2	2	2	2	2	2	2
1	1	2004-02-18	15	2	2	2	0	3	1	1	2	1	2	2	2	2	1	1	42	2	2	2	2	2	2	1	2	2	2	1	2	2	2	2	#NULL!	1	1	40	2	2	2	2	2	2	2	2	2	2	2
2	1	2005-09-27	14	2	2	2	0	3	1	1	2	1	2	2	2	2	1	1	43	3	2	2	2	2	2	2	2	2	2	2	2	2	2	1	#NULL!	1	1	37	1	2	2	2	2	2	2	2	2	2	2
2	6	2007-02-06	12	2	2	1	0	3	1	1	2	2	2	2	2	1	1	1	46	2	2	2	2	2	2	2	2	2	2	2	2	2	2	1	#NULL!	1	1	32	3	2	2	2	2	2	2	2	2	2	2
1	1	2006-06-26	13	2	1	2	0	5	1	1	1	1	2	2	2	2	1	1	42	3	2	2	2	2	2	2	2	2	2	2	2	2	2	1	#NULL!	1	1	37	2	2	2	2	2	2	2	2	2	2	2
2	6	2006-07-21	13	2	2	2	0	4	1	1	2	1	2	2	2	2	1	1	39	2	2	2	2	2	2	1	2	2	2	2	2	2	2	2	#NULL!	1	1	40	2	2	2	2	2	2	2	2	2	2	2
2	1	2006-11-26	13	2	2	2	0	6	1	1	1	1	2	2	2	2	1	1	32	3	2	2	2	2	2	2	2	2	2	2	2	2	2	1	#NULL!	1	1	33	1	2	2	2	2	2	2	2	2	2	2
1	3	2004-06-10	15	2	2	2	1	4	2	2	1	1	2	2	2	2	1	1	37	3	2	2	2	2	2	2	2	2	2	2	2	2	2	1	#NULL!	1	1	37	3	2	2	2	2	2	2	2	2	2	2
1	1	2005-05-14	14	2	2	2	0	2	1	2	2	1	2	2	2	2	1	2	#NULL!	2	2	2	2	2	2	2	2	2	2	2	2	2	2	1	#NULL!	1	1	35	1	2	2	2	2	2	2	2	2	2	2
2	6	2004-08-11	15	2	2	2	0	3	1	1	2	1	2	2	2	2	1	1	42	3	2	2	2	1	2	2	2	2	2	2	2	2	2	2	#NULL!	1	1	42	2	1	2	2	2	2	2	2	2	2	2
1	3	2005-07-26	14	2	2	2	0	3	1	1	2	1	2	2	2	2	1	1	44	4	2	2	2	2	2	2	2	2	2	2	2	2	2	1	#NULL!	1	1	36	5	2	2	2	2	2	2	2	2	2	2
2	3	2006-12-02	13	2	2	2	2	3	1	1	2	1	2	2	2	2	1	1	48	2	2	2	2	2	2	2	2	2	2	2	2	2	2	1	#NULL!	1	1	32	1	2	2	2	2	2	2	2	2	2	2
1	6	2006-02-02	13	2	2	1	0	3	1	1	1	2	2	2	2	2	1	1	40	2	2	2	2	2	2	2	2	2	2	2	2	2	2	1	#NULL!	1	1	43	3	2	2	2	2	2	2	2	2	2	2
2	1	2007-04-12	12	2	2	2	0	3	1	1	2	1	2	2	2	2	1	2	#NULL!	2	2	2	2	2	2	2	2	2	2	2	2	2	2	1	#NULL!	1	2	#NULL!	2	2	2	2	2	2	2	2	2	2	2
1	1	2007-03-15	12	2	2	2	0	3	1	1	1	2	2	2	2	2	1	2	#NULL!	4	2	2	2	2	2	2	2	2	2	2	2	2	2	1	#NULL!	1	2	#NULL!	3	2	2	2	2	2	2	2	2	2	2
1	1	2007-01-19	12	2	2	2	1	5	1	1	1	1	2	2	2	2	1	2	#NULL!	3	2	2	1	2	2	2	2	2	2	2	2	2	2	2	#NULL!	1	2	#NULL!	4	2	2	2	2	2	2	2	2	2	2
2	1	2006-05-08	13	2	2	2	0	5	1	1	2	1	2	2	2	2	1	1	42	3	2	2	2	2	2	2	2	2	2	2	2	2	2	1	#NULL!	1	1	39	2	2	2	2	2	2	2	2	2	2	2
2	1	2005-01-08	14	2	2	2	2	5	1	1	1	1	2	1	2	2	1	1	42	3	2	2	2	2	2	2	2	2	2	2	2	2	2	1	#NULL!	1	1	32	2	2	2	2	2	2	2	2	2	2	2
1	1	2006-08-24	13	2	2	2	0	3	1	1	2	1	2	2	2	2	1	2	#NULL!	3	2	2	2	2	2	2	2	2	2	2	2	2	2	1	#NULL!	1	2	#NULL!	2	2	2	2	2	2	2	2	2	2	2
1	3	2004-06-30	15	3	2	2	1	3	1	1	2	1	2	2	2	2	1	1	48	2	2	2	2	2	2	2	2	2	2	2	2	2	2	1	#NULL!	1	1	49	4	2	2	2	2	2	2	2	2	2	2
1	3	2004-06-30	15	3	2	2	0	4	1	1	1	1	2	2	2	2	1	1	41	3	2	2	2	2	2	2	2	2	2	1	2	2	2	2	#NULL!	1	1	40	2	2	2	2	2	2	2	2	2	2	2
2	3	2001-12-19	17	3	2	2	1	3	1	1	2	1	2	2	2	2	1	1	43	1	2	2	1	2	2	2	2	2	2	2	2	2	2	2	#NULL!	1	1	38	2	2	2	2	2	2	2	2	2	2	2
2	3	2004-08-15	15	3	2	2	4	2	2	2	1	2	1	2	2	2	1	2	#NULL!	0	2	2	2	2	2	2	2	2	2	1	2	2	2	2	#NULL!	1	1	35	2	2	2	2	2	2	2	2	2	2	1
1	5	2003-08-04	16	3	2	2	0	4	1	1	1	2	2	2	2	2	1	1	38	2	2	2	2	2	2	2	2	2	2	2	2	2	2	1	#NULL!	1	1	37	3	2	2	2	2	2	2	2	2	2	2
2	3	2003-09-26	16	3	2	2	0	4	1	1	1	1	2	2	2	2	1	1	40	2	2	2	2	2	2	2	2	2	2	2	2	2	1	2	#NULL!	1	1	36	2	2	2	2	2	2	2	2	2	2	2
2	1	2007-04-19	12	2	2	2	0	4	1	1	1	1	2	2	2	2	1	1	38	2	2	2	2	2	2	2	2	2	2	2	2	2	2	1	#NULL!	1	1	37	2	2	2	2	2	2	2	2	2	2	2
2	3	2006-10-06	13	2	2	2	0	3	1	1	2	1	2	2	2	2	1	1	36	3	2	2	2	2	2	2	2	2	2	2	2	2	2	1	#NULL!	1	1	31	2	2	2	2	2	2	2	2	2	2	2
2	1	2009-08-17	10	2	2	2	0	4	1	1	2	1	2	2	2	2	1	2	#NULL!	3	2	2	2	2	2	2	2	2	2	2	2	2	2	1	#NULL!	1	1	34	2	2	2	2	2	2	2	2	2	2	2
2	1	2004-01-26	15	2	2	2	3	2	1	1	2	2	2	2	2	2	1	2	#NULL!	1	2	2	2	1	2	2	2	2	2	2	2	2	2	2	#NULL!	1	2	#NULL!	3	2	2	2	2	2	2	2	2	2	1
2	6	2006-06-07	13	2	2	1	1	6	1	1	1	2	1	2	1	2	1	1	40	5	2	2	1	2	2	2	2	2	2	2	2	2	2	2	#NULL!	1	1	39	5	2	2	2	2	2	2	2	2	2	2
2	1	2003-07-31	16	3	2	2	0	6	2	2	1	2	1	1	2	2	1	1	40	2	2	2	2	2	2	2	2	2	2	2	2	2	2	1	#NULL!	1	1	41	3	2	2	2	2	2	2	2	2	2	2
2	1	2004-05-07	15	3	2	2	0	5	1	1	1	1	2	2	2	2	1	1	36	2	2	2	2	2	2	2	2	2	2	2	2	2	1	2	#NULL!	1	1	36	1	2	2	2	2	2	2	2	2	2	2
2	3	2006-04-06	13	2	2	2	0	3	1	1	2	1	2	2	2	2	1	1	43	2	2	2	2	2	2	2	2	2	2	2	2	2	1	2	#NULL!	1	1	42	2	2	2	2	2	2	2	2	2	2	2
1	1	2005-09-07	14	2	1	2	0	3	1	1	2	1	2	2	2	2	1	1	51	3	2	2	2	2	2	2	2	2	2	2	2	2	2	1	#NULL!	1	1	48	3	2	2	2	2	2	2	2	2	2	2
2	1	2004-06-14	15	3	2	2	1	3	1	1	2	1	2	2	2	2	1	2	#NULL!	3	2	2	2	2	2	2	2	2	2	2	2	2	2	1	#NULL!	1	2	#NULL!	2	2	2	2	2	2	2	2	2	2	2
1	2	2005-01-24	14	3	2	1	0	4	1	1	1	2	2	2	2	2	1	2	#NULL!	3	2	2	2	2	2	2	2	2	2	2	2	2	2	1	#NULL!	1	2	#NULL!	3	2	2	2	2	2	2	2	2	2	2
2	1	2003-04-23	16	3	2	2	1	3	1	1	2	1	2	2	2	2	1	1	36	1	2	2	2	2	2	2	2	2	2	2	2	2	2	1	#NULL!	1	1	34	2	2	2	2	2	2	2	2	2	2	2
2	1	2004-04-18	15	3	2	2	0	4	1	1	2	1	2	2	2	2	1	1	36	2	2	2	2	2	2	2	2	2	2	2	2	2	2	1	#NULL!	1	1	37	0	2	2	2	2	2	2	2	2	2	2
1	4	2005-09-10	14	2	1	1	0	2	1	1	2	2	2	2	2	2	1	1	38	4	2	2	2	2	2	2	2	2	2	2	2	2	2	1	#NULL!	1	1	40	5	2	2	2	2	2	2	2	2	2	2
1	2	2004-08-23	15	2	2	2	0	2	2	2	1	1	2	2	2	2	1	1	43	3	2	2	2	2	2	2	2	2	2	2	2	2	2	1	#NULL!	1	1	37	2	2	2	2	2	2	2	2	2	2	2
2	5	2006-10-08	13	2	2	2	1	5	1	1	2	1	1	2	2	2	1	1	34	2	2	2	2	2	2	2	2	2	2	2	2	2	2	1	#NULL!	1	1	35	3	2	2	2	2	2	2	2	2	2	2
1	1	2006-01-13	13	2	2	2	0	3	1	1	2	1	2	2	2	2	1	1	37	2	2	2	2	2	2	2	2	2	2	2	2	2	1	2	#NULL!	1	1	38	1	2	2	2	2	2	2	2	2	2	2
2	2	2006-12-01	13	2	2	1	0	3	1	1	1	2	2	2	2	2	1	2	#NULL!	2	2	2	2	1	2	2	2	2	2	2	2	2	2	2	#NULL!	1	2	#NULL!	5	2	2	2	2	2	2	2	2	2	1
2	3	2003-12-08	15	3	2	1	0	2	2	2	1	2	2	2	2	2	1	1	41	3	2	2	2	2	2	2	2	2	2	2	2	2	2	1	#NULL!	1	1	36	3	2	2	2	2	2	2	2	2	2	2
2	1	2003-02-11	16	3	2	1	0	2	1	1	2	2	2	2	2	2	1	1	43	3	2	2	2	2	2	2	2	2	2	2	2	2	2	1	#NULL!	1	1	42	3	2	2	2	2	2	2	2	2	2	2
2	6	2005-02-08	14	3	2	2	0	4	1	1	2	1	2	2	2	2	1	1	39	2	2	2	2	2	2	2	2	2	2	2	2	2	2	1	#NULL!	1	1	39	3	2	2	2	2	2	2	2	2	2	2
2	3	2003-08-22	16	3	2	2	0	5	2	2	2	1	2	2	2	1	2	#NULL!	#NULL!	#NULL!	#NULL!	#NULL!	#NULL!	#NULL!	#NULL!	#NULL!	#NULL!	#NULL!	#NULL!	#NULL!	#NULL!	#NULL!	#NULL!	#NULL!	15	1	1	47	2	2	2	2	2	2	2	2	2	2	2
1	2	2006-04-02	13	2	2	1	3	2	1	1	2	2	2	2	2	2	1	1	49	2	2	2	2	2	2	2	2	2	2	2	2	2	1	2	#NULL!	1	1	39	3	2	2	2	2	2	2	2	2	2	2
1	1	2005-08-30	14	2	1	1	0	4	1	1	1	2	2	2	2	2	1	1	42	5	2	2	2	2	2	2	2	2	2	2	2	2	2	1	#NULL!	1	1	40	4	2	2	2	2	2	2	2	2	2	2
1	1	2004-08-17	15	2	2	1	1	2	1	1	2	2	2	2	2	2	1	1	48	0	2	2	2	2	2	2	2	2	2	2	2	2	2	1	#NULL!	1	1	41	4	2	2	2	2	2	2	2	2	2	2
1	3	2005-09-06	14	2	2	1	0	4	1	1	1	2	1	1	2	2	1	1	38	4	2	2	1	2	2	2	2	2	2	2	2	2	2	2	#NULL!	1	1	38	4	2	2	2	2	2	2	1	2	2	2
2	2	2005-12-10	13	2	1	1	0	4	1	1	1	2	2	2	2	2	1	1	47	5	2	2	2	2	2	2	2	2	2	2	2	2	2	1	#NULL!	1	1	43	5	2	2	2	2	2	2	2	2	2	2
2	1	2002-12-15	16	3	2	2	0	5	1	1	2	1	2	2	2	2	1	1	52	1	2	2	2	2	2	2	2	2	2	2	2	2	2	1	#NULL!	1	1	50	1	2	2	2	2	2	2	2	2	2	1
2	6	2003-04-02	16	3	2	2	0	3	1	1	2	1	2	2	2	2	1	1	43	2	2	2	2	2	2	2	2	2	2	2	2	2	1	2	#NULL!	1	1	41	2	2	2	2	2	2	2	2	2	2	2
2	3	2006-02-19	13	2	2	1	0	2	1	1	2	2	2	2	2	2	1	1	44	4	2	2	2	2	2	2	2	2	2	2	2	2	2	1	#NULL!	1	1	40	4	2	2	2	2	2	2	2	2	2	2
1	1	2005-04-04	14	2	2	2	1	5	1	1	1	1	2	2	2	2	1	1	45	2	2	2	2	2	2	2	2	2	2	2	2	2	2	1	#NULL!	1	1	42	4	2	2	2	2	2	2	2	2	2	2
2	1	2005-12-31	13	2	2	1	0	2	1	1	2	2	2	2	2	2	1	2	#NULL!	3	2	2	2	2	2	2	2	2	2	2	2	2	2	1	#NULL!	1	2	#NULL!	2	2	2	2	2	2	2	2	2	2	2
2	3	2006-01-07	13	2	2	2	0	3	1	1	2	1	2	2	2	2	1	2	#NULL!	3	2	2	2	2	2	2	2	2	2	2	2	2	2	1	#NULL!	1	2	#NULL!	4	2	2	2	2	2	2	2	2	2	2
1	5	2003-10-29	16	3	2	1	0	7	1	2	1	2	1	2	1	2	1	2	#NULL!	0	2	2	2	2	2	2	2	2	2	2	2	2	2	1	#NULL!	1	1	45	4	2	2	2	2	2	2	2	2	2	2
2	1	2002-04-08	17	3	2	2	2	2	2	2	1	1	2	2	2	2	1	1	41	4	2	2	2	2	2	2	2	2	2	2	2	2	2	1	#NULL!	2	#NULL!	#NULL!	#NULL!	#NULL!	#NULL!	#NULL!	#NULL!	#NULL!	#NULL!	#NULL!	#NULL!	#NULL!	#NULL!
1	1	2004-01-14	15	3	2	1	0	4	1	1	1	2	2	2	2	2	1	1	45	1	2	2	2	2	2	2	2	2	2	2	2	2	2	1	#NULL!	1	1	45	1	2	2	2	2	2	2	2	2	2	1
2	6	2004-12-09	14	3	2	1	0	4	1	1	1	2	2	2	2	2	1	1	41	4	2	2	2	2	2	2	2	2	2	2	2	2	2	1	#NULL!	1	1	40	4	2	2	2	2	2	2	2	2	2	2
2	3	2003-11-06	16	3	2	2	0	5	1	2	1	1	2	2	2	2	1	1	38	2	2	2	2	2	2	2	2	2	2	2	2	2	2	1	#NULL!	1	1	39	2	2	2	2	2	2	2	2	2	2	2
1	1	2003-03-03	16	3	2	2	0	3	1	1	2	1	2	2	2	2	1	1	49	2	2	2	2	2	2	2	2	2	2	1	2	2	2	2	#NULL!	1	1	47	2	2	2	2	2	2	2	2	2	2	2
2	5	2003-07-15	16	3	2	2	1	5	1	1	2	1	2	2	2	2	1	1	50	3	2	2	2	2	2	2	2	2	2	2	2	2	2	1	#NULL!	1	1	39	2	2	2	2	2	2	2	2	2	2	2
2	6	2006-08-27	13	2	2	1	0	2	1	1	2	2	2	2	2	2	1	1	43	4	2	2	1	2	2	2	2	2	2	2	2	2	2	2	#NULL!	1	1	43	4	2	2	2	2	2	2	2	2	2	2
2	1	2005-09-11	14	2	2	1	0	1	1	2	2	2	2	2	2	2	1	2	#NULL!	2	2	2	2	2	2	2	2	2	2	2	2	2	2	1	#NULL!	1	1	44	2	1	2	2	2	2	2	2	2	2	2
2	6	2005-08-01	14	2	2	2	0	6	1	1	1	1	2	2	2	2	1	2	#NULL!	3	2	2	2	2	2	2	2	2	2	2	2	2	2	1	#NULL!	1	2	#NULL!	0	2	2	2	2	2	2	2	2	2	2
2	1	2006-06-10	13	2	1	2	0	3	1	1	2	1	2	2	2	2	1	1	40	4	2	2	2	2	2	2	2	2	2	2	2	2	2	1	#NULL!	1	1	35	2	2	2	2	2	2	2	2	2	2	2
2	2	2006-04-17	13	2	2	1	0	2	1	1	2	2	2	2	2	2	1	1	43	2	2	2	2	2	2	2	2	2	2	2	2	2	2	1	#NULL!	1	1	37	2	2	2	2	2	2	2	2	2	2	2
2	1	2005-08-27	14	2	2	2	0	5	1	1	1	1	2	2	2	2	1	1	41	3	2	2	2	2	2	2	2	2	2	2	2	2	2	1	#NULL!	1	1	39	3	2	2	2	2	2	2	2	2	2	2
2	1	2005-03-30	14	2	2	2	1	3	2	2	1	1	2	2	2	2	1	1	41	4	2	2	2	2	2	2	2	2	2	2	2	2	2	1	#NULL!	1	1	40	3	2	2	2	2	2	2	2	2	2	2
2	2	2006-04-11	13	2	2	2	0	3	1	1	2	1	2	2	2	2	1	1	43	3	2	2	2	2	2	2	2	2	2	2	2	2	2	1	#NULL!	1	1	38	2	2	2	2	2	2	2	2	2	2	2
2	3	2006-06-24	13	2	2	2	0	4	1	1	1	1	2	2	2	2	1	2	#NULL!	4	2	2	2	2	2	2	2	2	2	2	2	2	2	1	#NULL!	1	1	39	4	2	2	2	2	2	2	2	2	2	2
1	5	2003-09-09	16	3	2	2	1	3	1	2	1	2	2	2	2	2	1	1	43	3	1	2	2	2	2	2	2	2	2	2	2	2	2	2	#NULL!	1	1	38	2	2	2	2	2	2	2	2	2	2	2
2	1	2003-10-28	16	3	2	2	0	5	1	1	1	1	2	2	2	2	1	1	43	2	2	2	2	2	2	2	2	2	2	2	2	2	2	1	#NULL!	1	1	40	3	2	2	2	2	2	2	2	2	2	2
2	3	2003-01-08	16	3	2	2	1	2	1	1	2	2	2	2	2	2	1	1	43	3	2	2	2	2	2	2	2	2	2	2	2	2	1	2	#NULL!	1	1	40	2	2	2	2	2	2	2	2	2	2	2
1	1	2003-05-23	16	3	2	2	0	5	1	1	1	1	2	2	2	2	1	1	42	2	2	2	2	2	2	2	2	2	2	2	2	2	2	1	#NULL!	1	1	41	2	2	2	2	2	2	2	2	2	2	2
2	1	2004-03-16	15	3	2	2	1	4	1	1	1	1	2	2	2	2	1	1	43	2	2	2	2	2	2	2	2	2	2	2	2	2	2	1	#NULL!	1	1	43	3	2	2	2	2	2	2	2	2	2	2
2	3	2004-09-30	15	3	2	2	3	3	1	1	2	1	2	2	2	2	1	1	45	2	2	2	2	2	2	2	2	2	2	2	2	2	2	1	#NULL!	1	1	38	3	2	2	2	2	2	2	2	2	2	2
2	6	2003-09-12	16	3	2	2	0	4	1	1	1	1	2	2	2	2	1	1	43	1	2	2	2	2	2	2	2	2	2	2	2	2	2	1	#NULL!	1	1	38	2	2	2	2	2	2	2	2	2	2	2
2	1	2004-10-02	15	3	2	2	0	3	1	1	2	1	2	2	2	2	1	1	39	2	2	2	2	2	2	2	2	2	2	2	2	2	2	1	#NULL!	1	1	31	2	2	2	2	2	2	2	2	2	2	2
2	3	2004-03-13	15	3	2	2	0	7	1	1	1	1	1	2	2	2	1	1	42	2	2	2	2	2	2	2	2	2	2	2	2	2	1	2	#NULL!	1	1	35	3	2	2	2	2	2	2	2	2	2	2
2	1	2004-05-05	15	3	2	2	0	7	1	1	1	1	1	2	2	2	1	1	37	2	2	2	2	2	2	2	2	2	2	2	2	2	1	2	#NULL!	1	1	34	1	2	2	2	2	2	2	2	2	2	1
2	1	2006-11-13	13	2	2	1	0	2	1	1	2	2	2	2	2	2	1	1	42	5	2	2	2	2	2	2	2	2	2	2	2	2	2	1	#NULL!	1	1	38	5	2	2	2	2	2	2	2	2	2	2
1	3	2006-03-13	13	2	2	1	0	2	1	1	2	2	2	2	2	2	1	1	40	5	2	2	2	2	2	2	2	2	2	2	2	2	2	1	#NULL!	1	1	39	5	2	2	2	2	2	2	2	2	2	2
1	1	2006-02-24	13	2	2	2	1	1	1	2	2	2	2	2	2	2	1	1	56	3	2	2	2	2	2	2	2	2	2	2	2	2	2	1	#NULL!	1	1	56	2	2	2	2	2	2	2	2	2	2	2
1	6	2005-12-26	13	2	2	2	0	2	1	1	2	2	2	2	2	2	1	2	#NULL!	3	2	2	2	2	2	2	2	2	2	2	2	2	2	1	#NULL!	1	2	#NULL!	2	2	2	2	2	2	2	2	2	2	2
2	1	2006-08-26	13	2	2	1	0	4	2	2	2	2	1	2	1	2	1	1	37	3	2	2	2	2	2	2	2	2	2	2	2	2	2	1	#NULL!	1	1	33	2	2	2	2	2	2	2	2	2	2	2
2	6	2005-10-20	14	2	2	2	0	2	2	1	2	1	2	2	2	2	1	1	38	2	2	2	2	2	2	2	2	2	2	2	2	2	1	2	#NULL!	1	1	36	2	2	2	2	2	2	2	2	2	2	1
2	3	2005-10-25	14	2	2	1	0	1	1	2	2	2	2	2	2	2	1	2	#NULL!	0	2	2	2	2	2	2	2	2	2	2	2	2	2	1	#NULL!	1	1	43	5	2	2	2	2	2	2	2	2	2	2
2	1	2005-06-19	14	2	1	2	0	3	1	1	2	1	2	2	2	2	1	1	38	2	2	2	2	2	2	2	2	2	2	2	2	2	2	1	#NULL!	1	1	35	3	2	2	2	2	2	2	2	2	2	1
2	3	2004-12-04	15	3	2	1	0	2	1	1	2	2	2	2	2	2	1	1	39	3	2	2	2	2	2	2	2	2	2	2	2	2	2	1	#NULL!	1	1	35	3	2	2	2	2	2	2	2	2	2	2
1	6	2004-07-11	15	3	2	1	1	2	2	2	1	2	2	2	2	2	1	1	45	4	2	2	1	1	2	2	2	2	2	2	2	2	2	2	#NULL!	1	1	39	4	2	2	2	2	2	2	2	2	2	2
2	1	2003-11-16	16	3	2	2	0	3	1	1	2	1	2	2	2	2	1	1	35	2	2	2	2	2	2	2	2	2	2	2	2	2	2	1	#NULL!	1	1	43	4	2	2	2	2	2	2	2	2	2	2
2	1	2002-12-24	16	3	2	2	1	1	1	2	2	2	2	2	2	2	1	1	50	2	2	2	2	2	2	2	2	2	2	2	2	2	2	1	#NULL!	1	1	50	2	2	2	2	2	2	2	2	2	2	2
2	3	2003-10-15	16	3	2	1	0	2	1	1	2	2	2	2	2	2	1	1	35	3	1	2	2	2	2	2	2	2	2	2	2	2	2	2	#NULL!	1	1	35	3	2	2	2	2	2	2	2	2	2	2
2	3	2004-07-14	15	3	2	2	0	4	1	1	1	1	2	2	2	2	1	1	42	3	2	2	2	2	2	2	2	2	2	2	2	2	2	1	#NULL!	1	1	43	3	2	2	2	2	2	2	2	2	2	2
2	1	2003-06-11	16	3	2	2	0	5	1	1	1	1	2	2	2	2	1	2	#NULL!	2	2	2	2	2	2	2	2	2	2	2	2	2	1	2	#NULL!	1	2	#NULL!	2	2	2	2	2	2	2	2	2	2	2
1	1	2004-01-30	15	3	2	1	0	4	1	1	2	2	1	2	2	1	1	1	41	4	2	2	2	2	2	2	2	2	2	2	2	2	2	1	#NULL!	1	1	38	3	2	2	2	2	2	2	2	2	2	2
1	6	2004-11-20	15	3	2	2	2	4	1	2	1	1	2	2	2	2	1	2	#NULL!	2	2	2	2	2	2	2	2	2	1	2	2	2	2	2	#NULL!	1	2	#NULL!	2	2	2	2	2	2	2	2	2	2	2
2	1	2006-08-19	13	2	2	2	0	5	1	1	1	1	2	2	2	2	1	1	40	3	2	2	2	2	2	2	2	2	2	2	2	2	2	1	#NULL!	1	1	36	3	2	2	2	2	2	2	2	2	2	2
2	1	2006-06-30	13	2	2	2	0	4	1	1	2	1	2	2	2	2	1	1	35	2	2	2	2	2	2	2	2	2	2	2	2	2	2	1	#NULL!	1	1	32	2	2	2	2	2	2	2	2	2	2	2
2	1	2005-11-26	14	2	2	2	1	2	2	2	1	1	2	2	2	2	1	1	37	2	2	2	2	2	2	2	2	2	2	2	2	2	2	1	#NULL!	1	1	38	2	2	2	2	2	2	2	2	2	2	2
2	1	2006-09-06	13	2	2	1	0	2	1	1	2	2	2	2	2	2	1	1	38	4	2	2	2	2	2	2	2	2	2	2	2	2	2	1	#NULL!	1	1	39	5	2	2	2	2	2	2	2	2	2	2
2	1	2006-01-20	13	2	2	1	0	2	1	1	2	2	2	2	2	2	1	1	42	4	2	2	2	2	2	2	2	2	2	2	2	2	2	1	#NULL!	1	1	41	4	2	2	2	2	2	2	2	2	2	2
2	3	2006-11-05	13	2	1	1	0	4	1	1	1	2	2	2	2	2	1	1	50	5	2	2	2	2	2	1	2	2	2	2	2	2	1	2	#NULL!	1	1	48	4	2	2	1	2	2	2	2	2	2	2
2	1	2006-02-07	13	2	2	2	0	3	1	1	2	1	2	2	2	2	1	1	47	3	2	2	2	2	2	2	2	2	2	2	2	2	2	1	#NULL!	1	1	42	3	2	2	2	2	2	2	2	2	2	2
1	1	2006-07-26	13	2	2	2	3	8	1	2	2	2	1	2	1	2	2	#NULL!	#NULL!	#NULL!	#NULL!	#NULL!	#NULL!	#NULL!	#NULL!	#NULL!	#NULL!	#NULL!	#NULL!	#NULL!	#NULL!	#NULL!	#NULL!	#NULL!	1	1	1	38	2	2	2	2	2	2	2	2	2	2	1
2	2	2006-08-18	13	2	2	1	0	1	1	2	2	2	2	2	2	2	1	2	#NULL!	0	2	2	2	2	2	2	2	2	2	2	2	2	2	1	#NULL!	1	1	41	3	2	2	2	2	2	2	2	2	2	2
2	1	2006-09-05	13	2	2	2	0	3	1	1	2	1	2	2	2	2	2	#NULL!	#NULL!	#NULL!	#NULL!	#NULL!	#NULL!	#NULL!	#NULL!	#NULL!	#NULL!	#NULL!	#NULL!	#NULL!	#NULL!	#NULL!	#NULL!	#NULL!	5	1	1	37	3	2	2	2	2	2	2	2	2	2	2
2	1	2006-01-03	13	2	1	2	0	4	1	1	2	1	2	2	2	2	1	1	38	3	2	2	2	2	2	2	2	2	2	2	2	2	2	1	#NULL!	1	1	38	4	2	2	2	2	2	2	2	2	2	2
1	6	2004-02-10	15	3	2	2	0	6	1	1	1	1	2	2	2	2	1	1	34	2	2	2	2	2	2	2	2	2	2	2	2	2	2	1	#NULL!	1	1	33	3	2	2	2	2	2	2	2	2	2	2
2	1	2004-04-20	15	3	2	2	0	3	1	1	2	1	2	2	2	2	1	2	#NULL!	2	2	2	1	2	2	2	2	2	2	2	2	2	1	2	#NULL!	1	1	45	3	2	2	1	2	2	2	2	2	2	2
2	5	2004-08-14	15	3	2	2	5	8	1	2	1	2	1	2	1	2	1	2	#NULL!	2	2	2	2	2	2	2	2	2	2	2	2	2	2	1	#NULL!	1	1	34	2	2	2	2	2	2	2	2	2	2	2
2	1	2004-07-05	15	3	2	2	1	2	1	1	2	2	2	2	2	2	1	1	52	3	2	2	2	2	2	2	2	2	2	2	2	2	2	1	#NULL!	1	1	53	1	2	2	2	2	2	2	2	2	2	1
1	3	2004-02-20	15	3	2	2	0	4	1	1	1	1	2	2	2	2	1	1	41	4	2	2	2	2	2	2	2	2	2	2	2	2	2	1	#NULL!	1	1	40	3	2	2	2	2	2	2	2	2	2	2
2	6	2004-03-11	15	3	2	2	0	2	1	1	2	2	2	2	2	2	1	1	45	2	2	2	2	2	2	1	2	2	2	2	2	2	2	2	#NULL!	1	1	42	1	2	2	2	1	2	2	2	2	2	2
2	1	2004-07-25	15	3	2	1	0	2	1	1	2	2	2	2	2	2	1	1	43	4	2	2	2	2	2	2	2	2	2	2	2	2	1	2	#NULL!	1	1	39	4	2	2	1	2	2	2	2	2	2	2
1	3	2002-06-28	17	3	2	2	0	5	1	1	1	1	2	2	2	1	1	2	#NULL!	2	2	2	2	2	2	2	2	2	2	2	2	2	2	1	#NULL!	1	2	#NULL!	1	2	2	2	2	2	2	2	2	2	2
2	1	2009-10-25	10	3	2	2	1	3	1	1	2	1	2	2	2	2	1	2	#NULL!	2	2	2	2	2	2	2	2	2	2	2	2	2	2	1	#NULL!	1	2	#NULL!	1	2	2	2	2	2	2	2	2	2	2
2	3	2003-10-09	16	3	2	2	0	5	1	1	2	1	2	2	2	2	1	1	40	3	2	2	2	2	2	2	2	2	2	2	2	2	2	1	#NULL!	1	1	38	3	2	2	2	2	2	2	2	2	2	2
2	3	2003-11-16	16	3	2	2	0	3	1	1	2	1	2	2	2	2	1	1	46	3	2	2	2	2	2	2	2	2	2	2	2	2	2	1	#NULL!	1	1	38	2	2	2	2	2	2	2	2	2	2	2
2	2	2004-07-06	15	3	2	1	0	2	1	1	2	2	2	2	2	2	1	1	43	5	2	2	2	2	2	2	2	2	2	2	2	2	2	1	#NULL!	1	1	45	5	2	2	2	2	2	2	2	2	2	2
1	1	2002-09-18	17	3	2	1	0	2	1	1	2	2	2	2	2	2	1	1	45	5	2	2	2	2	2	2	2	2	2	2	2	2	2	1	#NULL!	1	1	43	3	2	2	2	2	2	2	2	2	2	2
2	1	2004-02-23	15	3	2	2	0	2	2	1	2	1	2	2	2	2	1	1	52	3	2	2	2	2	2	2	2	2	2	2	2	2	1	2	#NULL!	1	1	42	2	2	2	2	2	2	2	2	2	2	2
2	1	2006-06-21	13	2	2	1	0	4	1	1	1	2	2	2	2	2	1	1	40	2	2	2	2	2	2	2	2	2	2	2	2	2	2	1	#NULL!	1	1	36	3	2	2	2	2	2	2	2	2	2	2
1	6	2005-08-17	14	2	1	2	0	2	1	2	1	2	2	2	2	2	1	2	#NULL!	3	2	2	2	1	2	2	2	2	2	2	2	2	2	2	#NULL!	1	2	#NULL!	4	2	2	2	2	2	2	2	2	2	2
1	1	2006-02-13	13	2	2	2	0	5	1	1	1	1	2	2	2	2	1	1	43	2	2	2	2	2	2	2	2	2	2	2	2	2	2	1	#NULL!	1	1	40	2	2	2	2	2	2	2	2	2	2	2
1	3	2005-08-26	14	2	2	2	0	3	1	1	2	1	2	2	2	2	1	1	38	3	2	2	2	2	2	2	2	2	2	2	2	2	2	1	#NULL!	1	1	36	2	2	2	2	2	2	2	2	2	2	2
2	3	2005-10-03	14	2	2	2	0	3	1	1	2	1	2	2	2	2	1	2	#NULL!	4	2	2	2	2	2	2	2	2	2	2	2	2	2	1	#NULL!	1	2	#NULL!	2	2	2	2	2	2	2	2	2	2	2
2	1	2005-09-17	14	2	1	2	0	3	1	1	2	1	2	2	2	2	1	1	40	3	2	2	2	2	2	2	2	2	2	2	2	2	2	1	#NULL!	1	1	39	2	2	2	2	2	2	2	2	2	2	2
2	3	2006-03-13	13	2	2	2	0	2	1	2	2	1	2	2	2	2	1	1	39	0	2	2	2	2	2	2	2	2	2	2	2	2	2	1	#NULL!	1	1	37	0	2	2	2	2	2	2	2	2	2	2
2	1	2005-06-25	14	2	2	2	0	5	1	1	1	1	2	2	2	2	1	1	42	2	2	2	2	2	2	2	2	2	2	2	2	2	2	1	#NULL!	1	1	38	2	2	2	2	2	2	2	2	2	2	2
1	5	2005-01-13	14	2	2	2	5	4	1	1	2	1	2	2	2	2	1	1	42	3	2	2	2	2	2	2	2	2	2	2	2	2	2	1	#NULL!	1	1	40	2	2	2	2	2	2	2	2	2	2	2
1	1	2005-12-27	13	2	2	2	0	2	1	2	2	1	2	2	2	2	1	1	43	4	2	2	2	2	2	2	2	2	2	2	2	2	2	1	#NULL!	1	1	41	4	2	2	2	2	2	2	2	2	2	2
1	1	2006-07-02	13	2	1	2	0	3	1	1	2	1	2	2	2	2	1	1	44	5	2	2	2	2	2	2	2	2	2	2	2	2	2	1	#NULL!	1	1	37	3	2	2	2	2	2	2	2	2	2	2
2	1	2006-11-08	13	2	2	2	1	4	1	1	2	1	2	2	2	2	1	2	#NULL!	3	2	2	2	2	2	2	2	2	2	2	2	2	2	1	#NULL!	1	2	#NULL!	2	2	2	2	2	2	2	2	2	2	2
2	1	2004-10-27	15	3	2	1	1	3	1	2	1	2	1	2	2	2	2	#NULL!	#NULL!	#NULL!	#NULL!	#NULL!	#NULL!	#NULL!	#NULL!	#NULL!	#NULL!	#NULL!	#NULL!	#NULL!	#NULL!	#NULL!	#NULL!	#NULL!	0	1	1	34	2	2	2	2	2	2	2	2	2	2	2
1	2	2003-11-23	16	3	2	2	0	3	1	1	2	1	2	2	2	2	1	1	38	2	2	2	2	2	2	2	2	2	2	2	2	2	2	1	#NULL!	1	1	40	1	2	2	2	2	2	2	2	2	2	2
1	1	2004-08-07	15	3	2	2	0	4	1	1	1	1	2	1	2	2	1	1	40	3	2	2	2	2	2	2	2	2	2	2	2	2	2	1	#NULL!	1	1	39	1	2	2	2	2	2	2	2	2	2	2
2	1	2004-11-12	15	3	2	2	0	4	1	1	1	1	2	2	2	2	1	1	45	3	2	2	2	2	2	2	2	2	2	2	2	2	2	1	#NULL!	1	1	41	4	2	2	2	2	2	2	2	2	2	2
1	1	2004-04-20	15	3	2	2	0	3	1	1	2	1	2	2	2	2	1	1	51	5	2	2	2	2	2	2	2	2	2	2	2	2	2	1	#NULL!	1	1	51	4	2	2	2	2	2	2	2	2	2	2
2	6	2003-12-03	16	3	2	2	0	4	1	1	1	1	2	2	2	2	1	1	37	2	2	2	2	2	2	2	2	2	2	2	2	2	2	1	#NULL!	1	1	36	3	2	2	2	2	2	2	2	2	2	2
2	5	2002-12-05	16	3	2	2	0	5	1	1	1	1	2	2	2	2	1	1	39	3	2	2	2	2	2	2	2	2	2	1	2	2	2	2	#NULL!	1	1	40	2	2	2	2	2	2	2	2	2	2	1
2	1	2006-01-28	13	2	2	2	1	3	1	1	2	1	2	2	2	2	1	1	42	3	2	2	2	2	2	2	2	2	2	2	2	2	1	2	#NULL!	1	1	34	2	2	2	2	2	2	2	2	2	2	2
2	1	2006-10-01	13	2	2	2	0	5	1	1	1	1	2	2	2	2	1	1	41	3	2	2	2	2	2	2	2	2	2	2	2	2	2	1	#NULL!	1	1	39	2	2	2	2	2	2	2	2	2	2	2
2	6	2006-05-08	13	2	1	1	1	2	1	1	2	2	2	2	2	2	1	1	42	4	2	2	2	2	2	2	2	2	2	2	2	2	2	1	#NULL!	1	1	41	4	2	2	2	1	2	2	2	2	2	2
1	1	2005-11-15	14	2	2	2	0	7	1	1	1	1	2	2	2	2	1	1	42	4	2	2	2	2	2	2	2	2	2	2	2	2	2	1	#NULL!	1	1	38	3	2	2	2	2	2	2	2	2	2	2
2	4	2006-02-26	13	2	2	2	1	3	1	1	2	1	2	2	2	2	1	2	#NULL!	3	2	2	2	2	2	2	2	2	2	2	2	2	2	1	#NULL!	1	2	#NULL!	3	2	2	2	2	2	2	2	2	2	2
1	6	2007-03-29	12	2	2	2	0	3	1	1	2	1	2	2	2	2	1	1	36	4	2	2	2	2	2	2	2	2	2	2	2	2	2	1	#NULL!	1	1	37	4	2	2	2	2	2	2	2	2	2	2
1	1	2006-07-15	13	2	2	2	1	5	1	1	2	1	2	2	2	2	1	2	#NULL!	2	2	2	2	1	2	2	2	2	2	2	2	2	1	2	#NULL!	1	2	#NULL!	3	2	2	2	2	2	2	2	2	2	2
2	1	2005-05-07	14	2	1	1	0	2	1	1	2	2	2	2	2	2	1	1	41	3	2	2	2	2	2	2	2	2	2	2	2	2	2	1	#NULL!	1	1	36	3	2	2	2	2	2	2	2	2	2	2
2	3	2003-09-14	16	3	2	1	0	3	1	2	1	2	2	2	2	2	1	1	42	4	2	2	2	2	2	2	2	2	2	2	2	2	2	1	#NULL!	1	1	43	4	2	2	2	2	2	2	2	2	2	2
1	3	2004-07-14	15	3	2	1	0	4	1	1	1	2	2	2	2	2	1	2	#NULL!	4	2	2	2	2	2	2	2	2	2	2	2	2	2	1	#NULL!	1	2	#NULL!	2	2	2	2	2	2	2	2	2	2	2
1	1	2003-09-27	16	3	2	2	0	4	1	1	1	2	2	2	2	2	1	1	45	3	2	2	2	2	2	2	2	2	2	2	2	2	2	1	#NULL!	1	1	45	1	2	2	2	2	2	2	2	2	2	2
1	5	2004-07-08	15	3	2	2	0	2	1	1	2	2	2	2	2	2	1	1	48	1	2	2	2	2	2	2	2	2	2	2	2	2	2	1	#NULL!	1	1	46	1	2	2	2	2	2	2	2	2	2	2
2	1	2003-10-13	16	3	2	2	0	3	1	1	2	1	2	2	2	2	1	1	44	0	2	2	2	2	2	2	2	2	2	2	2	2	2	1	#NULL!	1	1	43	2	2	2	2	2	2	2	2	2	2	2
2	6	2004-01-29	15	3	2	2	0	5	1	1	1	1	2	2	2	2	1	1	37	2	2	2	2	2	2	2	2	2	2	2	2	2	2	1	#NULL!	1	1	33	2	2	2	2	2	2	2	2	2	2	2
1	6	2006-06-12	13	2	2	1	0	2	1	1	2	2	2	2	2	2	1	1	45	5	2	2	2	2	2	2	2	2	2	2	1	2	2	2	#NULL!	1	1	43	5	2	2	2	2	2	2	2	2	2	2
2	1	2006-07-23	13	2	1	1	0	2	1	1	2	2	2	2	2	2	1	1	42	5	2	2	2	2	2	2	2	2	2	2	2	2	2	1	#NULL!	1	1	42	5	2	2	2	1	2	2	2	2	2	2
1	3	2006-05-21	13	2	2	1	0	3	1	1	1	2	2	2	2	2	1	2	#NULL!	5	2	2	2	2	2	2	2	2	2	1	2	2	2	2	#NULL!	1	2	#NULL!	0	2	2	2	2	2	2	2	2	2	2
2	1	2005-09-19	14	2	1	1	0	4	1	1	1	2	2	2	2	2	1	2	#NULL!	2	2	2	2	2	2	2	2	2	2	2	2	2	2	1	#NULL!	1	2	#NULL!	2	2	2	2	2	2	2	2	2	2	2
1	6	2005-08-18	14	2	2	2	0	3	1	1	2	1	2	2	2	2	1	2	#NULL!	0	2	2	2	2	2	2	2	2	2	2	2	2	2	1	#NULL!	1	2	#NULL!	0	2	2	2	2	2	2	2	2	2	2
2	6	2005-12-03	14	2	2	2	0	3	1	1	2	1	2	2	2	2	1	1	37	2	2	2	2	2	2	2	2	2	2	2	2	2	2	1	#NULL!	1	1	35	3	2	2	2	2	2	2	2	2	2	2
2	1	2005-09-05	14	2	2	2	0	4	1	1	1	2	2	1	2	2	1	1	38	3	2	2	2	2	2	2	2	2	2	2	2	2	2	1	#NULL!	1	1	36	4	2	2	2	2	2	2	2	2	2	2
2	6	2003-07-02	16	3	2	2	3	3	1	1	2	1	2	2	2	2	1	1	43	2	2	2	1	2	2	2	2	2	2	1	2	2	2	2	#NULL!	1	1	40	2	2	2	2	2	2	2	2	1	2	2
1	1	2003-01-02	16	3	2	2	0	5	1	1	1	1	2	2	2	2	1	1	41	1	2	2	2	2	2	2	2	2	2	2	2	2	2	1	#NULL!	1	1	36	1	2	2	2	2	2	2	2	2	2	2
2	6	2003-07-06	16	3	2	2	0	1	1	2	2	2	2	2	2	2	1	1	50	2	2	2	2	2	2	2	2	2	2	2	2	2	2	1	#NULL!	1	1	40	2	2	2	1	2	2	2	2	2	2	2
2	1	2003-08-03	16	3	1	2	0	2	1	2	2	2	2	2	2	1	1	1	56	2	2	2	1	2	2	2	2	2	2	1	2	2	2	2	#NULL!	1	1	40	2	2	2	2	2	2	2	2	2	2	2
2	3	2002-12-21	16	3	2	2	0	3	1	1	2	1	2	2	2	2	1	1	43	2	2	2	2	2	2	2	2	2	2	2	2	2	2	1	#NULL!	1	1	40	2	2	2	2	2	2	2	2	2	2	2
1	1	2004-08-17	15	3	2	1	0	2	1	1	2	2	2	2	2	2	1	2	#NULL!	0	2	2	2	2	2	2	2	2	2	2	2	2	2	1	#NULL!	1	2	#NULL!	0	2	2	2	2	2	2	2	2	2	2
1	6	2006-04-17	13	2	2	1	0	2	1	1	2	2	2	2	2	2	1	1	40	5	2	2	2	2	2	2	2	2	2	2	2	2	2	1	#NULL!	1	1	40	5	2	2	2	2	2	2	2	2	2	2
1	1	2006-02-13	13	2	1	1	1	4	1	1	1	2	2	2	2	2	1	2	#NULL!	4	2	2	1	2	2	2	2	2	2	2	2	2	2	2	#NULL!	1	2	#NULL!	4	2	2	2	2	2	2	2	2	2	2
2	3	2006-07-01	13	2	2	2	0	3	2	2	1	1	2	2	2	2	1	1	42	3	2	2	2	2	2	1	2	2	2	2	2	2	2	2	#NULL!	1	1	39	1	2	2	2	2	2	2	2	2	2	2
2	1	2005-11-24	14	2	2	2	0	4	1	1	1	1	2	2	2	2	1	1	47	2	2	2	2	2	2	2	2	2	2	2	2	2	2	1	#NULL!	1	2	#NULL!	3	2	2	2	2	2	2	2	2	2	2
1	1	2006-07-14	13	2	1	1	1	6	2	1	2	2	1	1	2	2	1	1	36	2	2	2	2	2	2	1	2	2	2	2	2	2	2	2	#NULL!	1	1	35	3	2	2	2	2	2	2	2	2	2	2
2	1	2006-05-21	13	2	2	2	1	1	1	2	2	2	2	2	2	2	1	1	41	1	2	2	2	2	2	2	2	2	2	2	2	2	2	1	#NULL!	1	1	40	2	2	2	2	2	2	2	2	2	2	2
1	1	2006-05-10	13	2	2	2	0	5	1	1	1	2	2	2	2	2	1	2	#NULL!	2	2	2	2	2	2	2	2	2	2	2	2	2	2	1	#NULL!	1	2	#NULL!	3	2	2	2	2	2	2	2	2	2	2
1	5	2005-10-03	14	2	2	2	0	3	1	1	2	1	2	2	2	2	1	1	40	3	2	2	2	2	2	2	2	2	2	2	2	2	2	1	#NULL!	1	1	35	2	2	2	2	2	2	2	2	2	2	2
2	3	2006-08-16	13	2	2	2	0	3	1	1	2	1	2	2	2	2	1	1	39	5	2	2	2	2	2	2	2	2	2	2	2	2	2	1	#NULL!	1	1	37	5	2	2	2	2	2	2	2	2	2	2
2	1	2004-10-05	15	3	2	1	2	2	1	1	2	2	2	2	2	2	1	1	53	4	2	2	1	2	2	2	2	2	2	2	2	2	2	2	#NULL!	1	1	51	5	2	2	1	2	2	2	2	2	2	2
1	1	2003-10-20	16	3	1	1	0	3	1	1	1	2	2	2	2	2	1	1	41	5	2	2	1	2	2	2	2	2	2	2	2	2	2	2	#NULL!	1	1	43	5	2	2	2	2	2	2	2	2	2	2
2	1	2004-06-07	15	3	2	2	0	3	1	1	2	1	2	2	2	2	1	1	43	4	2	2	2	2	2	2	2	2	2	2	2	2	2	1	#NULL!	1	1	40	4	2	2	2	2	2	2	2	2	2	2
1	1	2004-07-05	15	3	2	2	0	3	1	1	2	1	2	2	2	2	1	1	40	4	2	2	2	2	2	2	2	2	2	2	2	2	1	2	#NULL!	1	1	35	4	2	2	2	2	2	2	2	2	2	2
2	3	2003-08-05	16	3	2	2	1	3	1	2	2	1	2	2	2	2	1	1	41	3	2	2	2	2	2	2	2	2	2	2	2	2	2	1	#NULL!	1	1	39	3	2	2	2	2	2	2	2	2	2	2
1	6	2003-07-12	16	3	2	2	0	3	1	1	2	1	2	2	2	2	1	1	42	2	2	2	2	2	2	2	2	2	2	2	2	2	2	1	#NULL!	1	2	#NULL!	2	2	2	2	2	2	2	2	2	2	2
2	6	2005-11-29	14	2	2	2	0	2	1	2	2	1	2	2	2	2	1	1	43	2	2	2	2	2	2	2	2	2	2	2	2	2	2	1	#NULL!	1	1	36	3	2	2	2	2	2	2	2	2	2	2
2	1	2006-03-08	13	2	1	1	3	2	1	1	2	2	2	2	2	2	1	1	43	4	2	2	2	2	2	2	2	2	2	2	2	2	1	2	#NULL!	1	1	42	4	2	2	2	2	2	2	2	2	2	2
2	3	2006-04-09	13	2	2	2	0	5	1	1	1	1	2	2	2	2	1	1	42	3	2	2	2	1	2	2	2	2	2	2	2	2	2	2	#NULL!	1	1	39	2	2	2	2	2	2	2	2	2	2	2
2	1	2006-04-13	13	2	2	2	1	3	1	1	2	1	2	2	2	2	1	1	46	3	2	2	2	2	2	2	2	2	2	2	2	2	2	1	#NULL!	1	1	38	3	2	2	2	2	2	2	2	2	2	2
2	1	2006-01-20	13	2	2	2	0	6	1	1	1	1	2	2	2	2	1	1	36	1	2	2	2	2	2	2	2	2	2	2	2	2	2	1	#NULL!	1	1	35	1	2	2	2	2	2	2	2	2	2	2
2	6	2003-07-03	16	3	2	2	1	5	1	2	1	1	2	2	2	2	1	1	38	2	2	2	2	2	2	2	2	2	2	2	2	2	1	2	#NULL!	1	1	38	2	2	2	2	2	2	2	2	2	2	2
2	1	2006-09-26	13	2	2	1	0	2	1	1	2	2	2	2	2	2	1	1	37	5	2	2	2	2	2	2	2	2	2	2	2	2	2	1	#NULL!	1	1	39	5	2	2	2	2	2	2	2	2	2	2
2	3	2006-12-11	12	2	2	1	3	2	1	1	2	2	2	2	2	2	1	1	37	5	2	2	2	2	2	2	2	2	2	2	2	2	2	1	#NULL!	1	1	42	5	2	2	2	2	2	2	2	2	2	2
2	1	2005-11-12	14	2	1	2	0	3	1	1	2	1	2	2	2	2	1	1	41	2	2	2	2	2	2	2	2	2	2	2	2	2	2	1	#NULL!	1	1	38	2	2	2	2	2	2	2	2	2	2	2
2	1	2005-11-26	14	2	2	1	1	2	1	1	2	2	2	2	2	2	1	2	#NULL!	4	2	2	2	2	2	2	2	2	2	2	2	2	2	1	#NULL!	1	2	#NULL!	4	2	2	2	2	2	2	2	2	2	2
2	1	2005-10-14	14	2	2	2	0	3	1	2	2	1	2	2	2	2	1	1	43	3	2	2	2	2	2	2	2	2	2	2	2	2	1	2	#NULL!	1	1	37	2	2	2	2	2	2	2	2	2	2	2
2	6	2006-08-06	13	2	2	2	0	5	1	1	2	1	1	2	1	2	1	1	36	4	2	2	2	2	2	2	2	2	2	2	2	2	2	1	#NULL!	1	1	37	4	2	2	2	2	2	2	2	2	2	2
2	3	2005-08-01	14	2	1	2	0	2	1	2	2	1	2	2	2	2	1	1	50	3	2	2	2	2	2	2	2	2	2	2	2	2	2	1	#NULL!	1	1	45	3	2	2	2	2	2	2	2	2	2	2
1	2	2003-08-18	16	3	2	2	0	4	1	1	1	1	2	2	2	2	1	1	43	2	2	2	1	2	2	2	2	2	2	2	2	2	2	2	#NULL!	1	1	42	2	2	2	2	2	2	2	2	2	2	2
2	3	2005-10-03	14	2	2	2	1	5	1	1	1	1	2	2	2	2	1	1	41	3	2	2	2	2	2	2	2	2	2	2	2	2	2	1	#NULL!	1	1	38	2	2	2	2	2	2	2	2	2	2	2
1	1	2006-06-07	13	2	2	1	1	2	1	1	2	2	2	2	2	2	1	1	35	4	2	2	2	2	2	2	2	2	2	2	2	2	2	1	#NULL!	1	1	35	4	2	2	2	2	2	2	2	2	2	2
2	3	2006-12-17	12	2	2	1	0	4	1	1	1	2	2	2	2	2	1	2	#NULL!	5	2	2	2	2	2	2	2	2	2	2	2	2	2	1	#NULL!	1	1	36	5	2	2	2	2	2	2	2	2	2	2
1	3	2005-08-07	14	2	1	1	0	2	1	1	2	2	2	2	2	2	1	1	40	4	2	2	2	2	2	2	2	2	2	2	2	2	2	1	#NULL!	1	1	40	3	2	2	2	2	2	2	2	2	2	2
2	6	2003-10-18	16	3	2	2	0	3	1	1	2	1	2	2	2	2	1	1	41	3	2	2	2	2	2	2	2	2	2	2	2	2	2	1	#NULL!	1	1	37	2	2	2	2	2	2	2	2	2	2	2
2	3	2003-10-09	16	3	2	2	0	3	1	1	2	1	2	2	2	2	1	1	37	3	2	2	2	2	2	2	2	2	2	2	2	2	2	1	#NULL!	1	1	35	3	2	2	2	2	2	2	2	2	2	2
2	3	2004-01-08	15	3	2	1	0	3	1	1	1	2	2	2	2	2	1	1	43	4	2	2	2	2	2	2	2	2	2	2	2	2	2	1	#NULL!	1	1	41	4	2	1	2	2	2	2	2	2	2	2
2	1	2004-02-04	15	3	2	2	0	3	1	1	1	2	2	2	2	2	1	1	47	2	2	2	2	2	2	2	2	2	2	2	2	2	2	1	#NULL!	1	1	45	2	2	2	2	2	2	2	2	2	2	2
2	1	2005-09-17	14	2	1	2	0	3	1	1	2	1	2	2	2	2	1	1	40	3	2	2	2	2	2	2	2	2	2	2	2	2	2	1	#NULL!	1	1	39	2	2	2	2	2	2	2	2	2	2	2
1	1	2005-04-19	14	2	2	2	0	3	1	1	2	1	2	2	2	2	1	1	39	2	2	2	2	2	2	2	2	2	2	2	2	2	1	2	#NULL!	1	1	32	2	2	2	2	2	2	2	2	2	2	2
1	1	2003-07-12	16	3	2	2	1	2	1	1	2	2	2	2	2	2	1	2	#NULL!	2	2	2	2	2	2	2	2	2	2	2	2	2	2	1	#NULL!	1	2	#NULL!	2	2	2	2	2	2	2	2	2	2	2
1	3	2004-05-05	15	3	2	1	0	3	1	2	1	2	2	2	2	2	1	2	#NULL!	0	2	2	2	2	2	2	2	2	2	2	2	2	2	1	#NULL!	1	2	#NULL!	3	2	2	2	2	2	2	2	2	2	2
1	1	2003-01-26	16	3	2	1	0	2	1	1	2	2	2	2	2	2	1	1	47	5	2	2	2	2	2	2	2	2	2	2	2	2	2	1	#NULL!	1	1	46	5	2	2	2	2	2	2	2	2	2	2
1	1	2003-05-07	16	3	2	1	1	2	1	1	2	2	2	2	2	2	1	1	46	4	2	2	2	2	2	2	2	2	2	1	2	2	1	2	#NULL!	1	2	#NULL!	4	2	2	2	2	2	2	2	2	2	2
1	1	2004-12-11	14	3	2	2	2	5	1	1	1	1	2	2	2	2	1	1	41	4	2	2	2	2	2	2	2	2	2	2	2	2	2	1	#NULL!	1	1	37	2	2	2	2	2	2	2	2	2	2	2
2	3	2006-01-18	13	2	2	1	0	2	1	1	2	2	2	2	2	2	1	1	39	5	2	2	2	2	1	2	2	2	2	2	2	2	2	2	#NULL!	1	1	37	5	2	2	2	2	2	2	2	2	2	2
2	1	2005-05-23	14	2	2	2	0	5	1	1	1	1	2	2	2	2	1	1	41	2	2	2	2	2	2	2	2	2	2	2	2	2	1	2	#NULL!	1	1	36	3	2	2	2	2	2	2	2	2	2	2
2	1	2005-08-28	14	2	2	1	0	4	1	1	1	2	2	2	2	2	1	1	42	2	2	2	2	2	2	2	2	2	2	2	2	2	2	1	#NULL!	2	#NULL!	#NULL!	#NULL!	#NULL!	#NULL!	#NULL!	#NULL!	#NULL!	#NULL!	#NULL!	#NULL!	#NULL!	#NULL!
1	1	2006-09-02	13	2	2	1	1	2	1	1	2	2	2	2	2	2	1	1	43	4	2	2	2	2	2	2	2	2	2	2	2	2	2	1	#NULL!	1	1	37	4	2	2	2	2	2	2	2	2	2	2
2	1	2006-08-15	13	2	1	1	0	4	1	2	1	2	2	2	1	2	1	2	#NULL!	0	2	2	2	2	2	2	2	2	2	2	2	2	2	1	#NULL!	1	1	38	0	2	2	2	2	2	2	2	2	2	2
1	1	2005-05-17	14	2	1	2	1	2	1	1	2	2	2	2	2	2	1	2	#NULL!	3	2	2	2	2	2	2	2	2	2	2	2	2	2	1	#NULL!	1	1	39	3	2	2	2	2	2	2	2	2	2	2
1	1	2006-07-23	13	2	2	1	5	2	1	1	2	2	2	2	2	2	1	1	49	4	2	2	2	2	2	2	2	2	2	2	2	2	2	1	#NULL!	1	1	41	0	2	2	2	2	2	2	2	2	2	2
2	1	2004-02-12	15	3	2	2	1	2	2	2	1	2	2	2	2	2	1	1	42	2	2	2	2	2	2	2	2	2	2	2	2	2	2	1	#NULL!	1	1	35	3	2	2	2	2	2	2	2	2	2	2
2	1	2003-08-27	16	3	2	2	1	8	1	1	1	1	1	2	1	2	1	1	39	3	2	2	2	2	2	2	2	2	2	2	2	2	2	1	#NULL!	1	1	42	3	2	2	2	2	2	2	2	2	2	2
2	5	2005-11-07	14	3	2	2	4	5	1	1	2	1	2	2	2	2	1	1	41	3	2	2	2	2	2	2	2	2	2	2	2	2	2	1	#NULL!	1	1	42	2	2	2	2	2	2	2	2	2	2	2
2	1	2005-11-15	14	2	2	2	0	2	1	1	2	2	2	2	2	2	1	1	48	2	2	2	2	2	2	2	2	2	2	2	2	2	2	1	#NULL!	1	1	49	2	2	2	2	2	2	2	2	2	2	2
2	1	2006-03-14	13	2	2	2	0	3	1	1	1	2	2	2	2	2	1	1	47	1	2	2	1	1	2	2	2	2	2	2	2	2	2	2	#NULL!	1	1	40	3	2	2	2	2	2	2	2	2	2	2
2	1	2006-04-23	13	2	1	2	0	4	1	1	1	1	2	2	2	2	1	1	38	4	2	2	2	2	2	2	2	2	2	2	2	2	2	1	#NULL!	1	1	37	3	2	2	2	2	2	2	2	2	2	2
2	1	2006-05-16	13	2	2	2	0	2	1	1	2	2	2	2	2	2	1	2	#NULL!	0	2	2	2	2	2	2	2	2	2	2	2	2	2	1	#NULL!	1	1	48	0	2	2	2	2	2	2	2	2	2	2
2	2	2006-09-06	13	2	2	1	0	3	1	2	1	2	1	2	2	2	1	1	40	4	2	2	2	2	2	2	2	2	2	1	2	2	2	2	#NULL!	1	1	39	4	2	2	2	2	2	2	2	2	2	2
2	2	2004-07-30	15	3	2	2	0	6	1	2	1	1	1	2	2	2	2	#NULL!	#NULL!	#NULL!	#NULL!	#NULL!	#NULL!	#NULL!	#NULL!	#NULL!	#NULL!	#NULL!	#NULL!	#NULL!	#NULL!	#NULL!	#NULL!	#NULL!	8	1	1	42	2	2	2	2	2	2	2	2	2	2	2
1	1	2003-12-01	16	3	2	1	0	1	1	2	2	2	2	2	2	2	1	2	#NULL!	0	2	2	2	2	2	2	2	2	2	2	2	2	2	1	#NULL!	1	1	39	4	2	2	2	2	2	2	2	2	2	2
2	1	2006-10-06	13	2	1	2	0	3	1	1	2	1	2	2	2	2	1	1	42	4	2	2	2	2	2	2	2	2	2	2	2	2	2	1	#NULL!	1	1	43	2	2	2	2	2	2	2	2	2	2	2
2	6	2005-10-18	14	2	2	2	0	3	2	1	1	1	2	2	2	2	1	1	44	3	2	2	1	2	2	2	2	2	2	2	2	2	2	2	#NULL!	1	2	#NULL!	2	2	2	2	2	2	2	2	2	2	2
2	1	2005-08-06	14	2	2	2	1	3	1	1	2	1	2	2	2	2	1	2	#NULL!	3	2	2	2	2	2	2	2	2	2	2	2	2	2	1	#NULL!	1	1	36	5	2	2	2	2	2	2	2	2	2	2
1	5	2003-12-01	16	3	1	2	3	8	1	1	2	1	1	2	1	2	1	1	46	2	2	2	2	2	2	2	2	2	2	2	2	2	2	1	#NULL!	1	1	42	2	2	2	2	2	2	2	2	2	2	2
2	5	2003-05-26	16	3	2	2	0	4	2	1	2	1	2	1	2	2	1	1	47	2	2	2	2	2	2	1	2	2	2	1	2	2	2	2	#NULL!	2	#NULL!	#NULL!	#NULL!	#NULL!	#NULL!	#NULL!	#NULL!	#NULL!	#NULL!	#NULL!	#NULL!	#NULL!	#NULL!
2	1	2006-02-17	13	2	2	1	1	2	1	1	2	2	2	2	2	2	1	1	36	2	2	2	2	2	2	2	2	2	2	2	2	2	1	2	#NULL!	1	1	36	2	2	2	2	2	2	2	2	2	2	2
2	3	2005-10-14	14	2	2	2	0	3	1	1	2	1	2	2	2	2	1	1	39	1	2	2	2	2	2	2	2	2	2	2	2	2	2	1	#NULL!	1	1	37	2	2	2	2	2	2	2	2	2	2	2
2	1	2005-06-23	14	2	1	2	1	2	1	1	2	2	2	2	2	2	1	1	38	5	2	2	2	2	2	2	2	2	2	2	2	2	2	1	#NULL!	1	1	43	5	2	2	2	2	2	2	2	2	2	2
2	1	2005-04-11	14	2	2	2	0	5	1	1	1	1	2	2	2	2	1	1	42	3	2	2	2	2	2	2	2	2	2	2	2	2	1	2	#NULL!	1	1	47	2	2	2	2	2	2	2	2	2	2	1
2	1	2004-09-23	15	2	2	2	0	4	1	1	1	1	2	2	2	2	1	1	44	3	2	2	2	2	2	2	2	2	2	2	2	2	2	1	#NULL!	1	1	43	2	2	2	2	2	2	2	2	2	2	2
2	6	2006-07-05	13	2	2	1	2	4	1	1	1	2	2	2	2	2	1	2	#NULL!	5	2	2	2	2	2	2	2	2	2	2	2	2	1	2	#NULL!	1	1	35	5	2	2	2	2	2	2	2	2	2	2
2	1	2006-05-27	13	2	1	2	1	2	2	1	2	1	2	2	2	2	1	2	#NULL!	2	2	2	2	2	2	2	2	2	2	2	2	2	2	1	#NULL!	1	2	#NULL!	4	2	2	2	2	2	2	2	2	2	2
1	3	2005-11-29	14	2	2	1	0	2	1	1	2	2	2	2	2	2	1	2	#NULL!	0	2	2	2	2	2	2	2	2	2	2	2	2	2	1	#NULL!	1	2	#NULL!	5	2	2	2	2	2	2	2	2	2	2
2	2	2006-08-03	13	2	2	2	0	3	1	1	2	1	2	2	2	2	1	1	39	3	2	2	2	2	2	2	2	2	2	2	2	2	2	1	#NULL!	1	1	38	5	2	2	2	2	2	2	2	2	2	2
2	1	2002-12-12	16	3	2	2	0	4	1	1	1	1	2	2	2	2	1	2	#NULL!	1	2	2	2	2	2	2	2	2	2	1	2	2	2	2	#NULL!	1	2	#NULL!	1	2	2	2	2	2	2	2	2	2	1
2	6	2002-12-27	16	3	2	2	1	3	1	1	2	1	2	2	2	2	1	1	44	1	2	2	2	2	2	2	2	2	2	2	2	2	2	1	#NULL!	1	1	42	1	2	2	2	2	2	2	2	2	2	2
1	1	2002-03-12	17	3	2	1	2	2	1	1	2	2	2	2	2	2	1	1	38	2	2	2	2	2	2	2	2	2	2	2	2	2	2	1	#NULL!	1	1	35	3	2	2	2	2	2	2	2	2	2	2
2	5	2003-10-30	16	3	2	2	0	4	1	1	1	1	2	2	2	2	1	1	45	4	2	2	2	2	2	2	2	2	2	2	2	2	2	1	#NULL!	1	1	42	3	2	2	2	2	2	2	2	2	2	2
2	5	2004-01-01	15	3	2	1	0	1	2	2	1	2	2	2	2	2	1	1	41	3	2	2	2	2	2	2	2	2	2	2	2	2	2	1	#NULL!	1	1	40	4	2	2	2	2	2	2	2	2	2	2
2	3	2003-07-21	16	3	2	2	2	6	1	1	1	1	2	2	2	2	1	1	41	3	2	2	2	2	2	2	2	2	2	2	2	2	2	1	#NULL!	1	1	37	3	2	2	2	2	2	2	2	2	2	2
2	1	2004-07-11	15	3	2	1	1	1	1	2	2	2	2	2	2	2	1	1	39	4	2	2	2	2	2	2	2	2	2	2	2	2	2	1	#NULL!	1	1	35	2	2	2	2	2	2	2	2	2	2	2
2	6	2004-05-25	15	3	2	2	2	4	2	2	2	2	1	2	1	2	1	1	41	3	1	2	2	2	2	2	2	2	2	2	2	2	2	2	#NULL!	1	1	41	3	2	2	2	2	2	2	2	2	2	2
2	1	2003-11-28	16	3	2	2	1	2	1	1	2	2	2	2	2	2	1	1	51	4	2	2	2	2	2	2	2	2	2	2	2	2	2	1	#NULL!	1	1	49	2	2	2	2	2	2	2	2	2	2	2
1	3	2006-02-20	13	2	2	2	0	2	1	2	2	1	2	2	2	2	1	2	#NULL!	0	2	2	1	1	2	2	2	2	2	2	2	2	2	2	#NULL!	1	1	32	0	2	2	2	2	2	2	2	2	2	2
1	1	2005-11-28	14	2	2	2	0	4	1	1	2	1	2	2	1	2	1	1	42	2	2	2	2	2	2	2	2	2	2	2	2	2	2	1	#NULL!	1	1	37	1	2	2	2	1	2	2	2	2	2	2
1	6	2006-02-19	13	2	2	2	0	3	1	2	1	1	2	2	2	2	1	1	37	2	2	2	2	2	2	2	2	2	2	2	2	2	2	1	#NULL!	1	1	37	3	2	2	2	2	2	2	2	2	2	2
2	2	2005-12-03	14	2	2	2	0	4	1	1	1	1	2	2	2	2	1	1	43	2	2	2	2	2	2	2	2	2	2	2	2	2	1	2	#NULL!	1	1	43	3	2	2	2	2	2	2	2	2	2	2
2	1	2005-08-29	14	2	2	2	0	4	1	1	1	1	2	2	2	2	1	1	40	3	2	2	2	2	2	2	2	2	2	2	2	2	2	1	#NULL!	1	1	39	3	2	2	2	2	2	2	2	2	2	2
1	1	2006-03-02	13	2	2	1	0	2	2	2	1	2	2	2	2	2	1	1	37	2	2	2	2	2	2	2	2	2	2	1	2	2	1	2	#NULL!	1	1	34	2	2	2	2	2	2	2	2	2	2	2
1	4	2005-12-26	13	2	2	2	0	4	1	1	1	2	2	2	2	2	1	1	38	3	2	2	2	2	2	2	2	2	2	2	2	2	2	1	#NULL!	1	1	39	3	2	2	2	2	2	2	2	2	2	1
1	1	2005-10-06	14	2	2	1	0	3	1	1	1	2	2	2	2	2	1	1	42	2	2	2	2	2	2	2	2	2	2	2	2	2	2	1	#NULL!	1	1	38	3	2	2	2	2	2	2	2	2	2	2
1	1	2005-08-03	14	2	2	2	0	4	1	1	2	1	2	1	2	2	1	1	43	1	2	2	2	2	2	2	2	2	2	2	2	2	2	1	#NULL!	1	1	42	1	2	2	2	2	2	2	2	2	2	2
2	5	2004-03-14	15	3	2	1	0	3	2	2	1	2	2	1	2	2	2	#NULL!	#NULL!	#NULL!	#NULL!	#NULL!	#NULL!	#NULL!	#NULL!	#NULL!	#NULL!	#NULL!	#NULL!	#NULL!	#NULL!	#NULL!	#NULL!	#NULL!	13	1	1	38	2	2	2	2	2	2	2	2	2	2	2
2	6	2005-02-15	14	3	2	1	1	4	1	1	1	2	2	2	2	2	1	1	38	3	2	2	2	2	2	2	2	2	2	2	2	2	2	1	#NULL!	1	1	42	2	2	2	2	2	2	2	2	2	2	2
2	1	2002-12-01	17	3	1	1	1	4	1	1	1	2	2	2	2	2	1	2	#NULL!	5	2	2	1	2	2	2	2	2	2	2	2	2	2	2	#NULL!	1	1	39	4	2	2	2	2	2	2	2	2	2	2
2	6	2003-08-14	16	3	1	2	0	4	1	1	2	1	2	2	2	2	1	1	56	2	2	2	2	2	2	2	2	2	2	2	2	2	1	2	#NULL!	1	1	55	2	2	2	2	2	2	2	2	2	2	2
1	1	2004-04-29	15	3	2	2	1	0	2	2	2	2	2	2	2	2	1	1	44	3	2	2	2	2	1	1	2	2	2	2	2	2	2	2	#NULL!	1	1	43	1	2	2	2	2	2	2	2	2	2	2
2	5	2004-04-28	15	3	2	1	0	4	1	1	1	2	2	2	2	2	1	2	#NULL!	5	2	2	2	2	2	2	2	2	2	2	2	2	2	1	#NULL!	1	2	#NULL!	5	2	2	2	2	2	2	2	2	2	2
2	6	2004-08-26	15	3	2	2	0	2	1	1	2	2	2	2	2	2	1	1	36	3	2	2	2	2	2	2	2	2	2	2	2	2	2	1	#NULL!	1	1	35	2	2	2	2	2	2	2	2	2	2	2
2	1	2004-02-02	15	3	2	2	0	4	1	1	2	1	1	2	2	2	1	1	42	4	2	2	2	2	2	2	2	2	2	2	2	2	2	1	#NULL!	1	1	43	5	2	2	2	2	2	2	2	2	2	2
2	6	2002-04-12	17	3	2	2	0	7	1	1	1	1	2	2	2	1	1	1	39	2	2	2	2	2	2	2	2	2	2	2	2	2	2	1	#NULL!	1	1	32	2	2	2	2	2	2	2	2	2	2	2
2	3	2003-04-11	16	3	2	2	0	4	1	1	1	1	2	2	2	2	1	1	42	2	2	2	1	2	2	2	2	2	2	2	2	2	2	2	#NULL!	1	1	37	2	2	2	2	2	2	2	2	2	2	2
2	6	2006-04-17	13	2	1	2	0	2	1	1	2	2	2	2	2	2	1	2	#NULL!	5	2	2	2	2	2	2	2	2	2	2	2	2	1	2	#NULL!	1	2	#NULL!	4	2	2	1	2	2	2	2	1	2	2
2	1	2006-09-05	13	2	2	2	0	1	2	2	2	1	2	2	2	2	1	2	#NULL!	3	2	2	2	2	2	2	2	2	2	2	2	2	2	1	#NULL!	1	2	#NULL!	3	2	2	2	2	2	2	2	2	2	2
1	6	2004-10-24	15	2	2	2	0	3	1	1	1	2	2	2	2	2	1	1	45	3	2	2	2	2	2	2	2	2	2	2	2	2	1	2	#NULL!	1	1	37	2	2	2	2	2	2	2	2	2	2	2
1	3	2005-06-22	14	2	1	2	0	2	1	1	2	2	2	2	2	2	1	1	53	5	2	2	1	2	2	2	2	2	2	2	1	2	2	2	#NULL!	1	1	48	4	2	2	2	2	2	2	2	2	2	2
1	1	2004-08-26	15	2	2	2	0	4	1	1	1	1	2	2	2	2	1	1	43	3	2	2	2	2	2	2	2	2	2	2	2	2	2	1	#NULL!	1	1	41	2	2	2	2	2	2	2	2	2	2	2
1	1	2005-07-09	14	2	1	2	0	2	1	1	2	2	2	2	2	2	1	1	45	3	2	2	2	2	2	2	2	2	2	2	2	2	2	1	#NULL!	1	1	42	3	2	2	2	2	2	2	2	2	2	2
2	1	2006-04-16	13	2	2	1	0	3	1	1	1	2	2	2	2	2	1	1	48	3	2	2	2	2	2	2	2	2	2	2	2	2	1	2	#NULL!	1	1	42	3	2	2	2	2	2	2	2	2	2	2
1	1	2006-05-01	13	2	2	2	0	2	2	2	1	2	2	2	2	2	1	1	38	3	2	2	2	2	2	2	2	2	2	2	2	2	2	1	#NULL!	1	1	37	1	2	2	2	2	2	2	2	2	2	2
1	3	2005-02-14	14	2	2	2	0	5	1	1	1	1	2	2	2	2	1	2	#NULL!	2	2	2	2	2	2	2	2	2	2	2	2	2	2	1	#NULL!	1	1	39	3	2	2	2	2	2	2	2	2	2	2
2	1	2006-10-21	13	2	2	1	1	4	1	2	1	2	1	2	2	2	1	2	#NULL!	0	2	2	2	2	2	2	2	2	2	2	2	2	2	1	#NULL!	1	1	39	4	2	2	2	2	2	2	2	2	2	2
2	2	2006-10-09	13	2	2	1	0	2	1	1	2	2	2	2	2	2	1	2	#NULL!	4	2	2	2	2	2	2	2	2	2	2	2	2	1	2	#NULL!	1	2	#NULL!	5	2	2	2	2	2	2	2	2	2	2
2	1	2004-06-29	15	3	2	1	0	5	2	2	1	2	1	1	2	2	1	1	40	3	1	2	2	2	2	2	2	2	2	2	2	2	2	2	#NULL!	1	1	40	3	2	2	2	2	2	2	2	2	2	2
2	1	2003-11-22	16	3	2	2	0	3	1	1	2	1	2	2	2	2	1	1	55	3	2	2	2	2	2	2	2	2	2	1	2	2	2	2	#NULL!	1	1	57	3	2	2	1	2	2	2	2	2	2	2
2	1	2004-05-18	15	3	2	2	0	3	1	1	2	1	2	2	2	2	1	1	42	3	2	2	2	2	2	2	2	2	2	2	2	2	2	1	#NULL!	1	1	35	3	2	2	2	2	2	2	2	2	2	2
1	1	2006-07-09	13	2	2	2	0	4	1	1	1	1	2	2	2	2	1	1	45	2	2	2	2	2	2	2	2	2	2	2	2	2	2	1	#NULL!	1	1	40	1	2	2	2	2	2	2	2	2	2	2
1	1	2006-02-02	13	2	2	1	0	2	1	2	1	2	2	2	2	2	1	1	41	5	2	2	1	2	2	2	2	2	2	2	2	2	2	2	#NULL!	1	1	39	4	2	2	2	2	2	2	2	2	2	2
2	3	2006-07-02	13	2	2	1	0	6	1	1	1	2	1	1	2	2	1	1	37	4	2	2	1	2	2	2	2	2	2	2	2	2	2	2	#NULL!	1	1	36	3	2	2	2	2	2	2	2	2	2	2
2	1	2006-01-11	13	2	2	2	0	2	1	1	2	2	2	2	2	2	1	1	46	3	2	2	2	2	2	2	2	2	2	2	2	2	2	1	#NULL!	1	1	45	2	2	2	2	2	2	2	2	2	2	2
2	3	2006-08-23	13	2	2	2	0	4	1	1	1	1	2	2	2	2	1	1	37	3	2	2	2	2	2	2	2	2	2	2	2	2	2	1	#NULL!	1	1	37	3	2	2	2	2	2	2	2	2	2	2
1	1	2005-12-17	13	2	1	2	0	4	1	1	1	2	2	2	2	2	1	2	#NULL!	4	2	2	2	2	2	2	2	2	2	2	2	2	2	1	#NULL!	1	2	#NULL!	4	2	2	2	2	2	2	2	2	2	2
2	1	2006-03-16	13	2	2	2	0	9	2	1	1	1	1	2	1	2	1	1	48	2	2	2	2	2	2	2	2	2	2	2	2	2	2	1	#NULL!	1	1	46	3	2	2	2	2	2	2	2	2	2	2
2	1	2006-05-23	13	2	2	1	1	2	1	1	2	2	2	2	2	2	1	1	43	4	2	2	2	2	2	2	2	2	2	2	2	2	2	1	#NULL!	1	1	40	4	2	2	2	2	2	2	2	2	2	2
2	1	2004-08-18	15	2	2	2	2	5	1	1	1	1	2	2	2	2	1	1	42	2	2	2	2	2	2	2	2	2	2	2	2	2	2	1	#NULL!	1	1	37	2	2	2	2	2	2	2	2	2	2	2
2	5	2004-02-10	15	3	2	2	0	4	1	2	1	1	2	2	2	2	1	1	39	2	2	2	1	2	2	2	2	2	2	2	2	2	2	2	#NULL!	1	1	38	1	2	2	2	2	2	2	2	2	2	2
2	1	2003-07-17	16	3	2	2	0	9	1	1	2	1	2	2	2	2	1	1	38	2	2	2	2	2	2	2	2	2	2	2	2	2	2	1	#NULL!	1	1	37	3	2	2	2	2	2	2	2	2	2	2
2	1	2004-08-16	15	3	2	2	1	2	1	2	2	1	2	2	2	2	1	2	#NULL!	3	2	2	2	2	2	2	2	2	2	2	2	2	2	1	#NULL!	1	1	32	2	2	2	2	2	2	2	2	2	2	2
1	3	2004-02-04	15	3	2	1	0	2	1	1	2	2	2	2	2	2	1	2	#NULL!	3	2	2	2	2	2	2	2	2	2	1	2	2	2	2	#NULL!	1	2	#NULL!	3	2	2	2	2	2	2	2	2	2	2
2	1	2003-01-07	16	3	1	2	0	2	1	2	2	1	2	2	2	2	1	1	45	5	2	2	2	2	2	2	2	2	2	2	2	2	2	1	#NULL!	1	1	42	4	2	2	2	2	2	2	2	2	2	2
2	6	2005-10-30	14	2	1	1	0	2	1	1	2	2	2	2	2	2	1	1	42	5	2	2	2	2	2	2	2	2	2	2	2	2	2	1	#NULL!	1	1	41	4	2	2	2	2	2	2	2	2	2	2
2	1	2005-06-10	14	2	2	2	1	3	1	1	2	1	2	2	2	2	1	1	43	2	2	2	2	2	2	2	2	2	2	2	2	2	2	1	#NULL!	1	1	36	3	2	2	2	2	2	2	2	2	2	2
2	1	2005-02-28	14	2	2	2	0	6	1	1	2	1	2	2	2	1	1	1	58	3	2	2	2	2	2	2	2	2	2	2	2	2	2	1	#NULL!	1	1	56	1	2	2	2	2	2	1	2	2	2	2
2	2	2006-03-07	13	2	2	2	0	5	1	1	1	1	2	2	2	2	1	1	43	3	2	2	2	2	2	2	2	2	2	2	2	2	2	1	#NULL!	1	1	43	2	2	2	2	2	2	2	2	2	2	2
2	2	2005-10-03	14	2	2	1	0	1	1	2	2	2	2	2	2	2	1	1	42	4	2	2	2	2	2	2	2	2	2	2	2	2	2	1	#NULL!	1	1	38	4	2	2	2	2	2	2	2	2	2	2
2	1	2006-10-01	13	2	2	1	1	2	1	1	2	2	2	2	2	2	1	1	40	5	2	2	2	2	2	2	2	2	2	2	2	2	2	1	#NULL!	1	1	41	5	2	2	2	2	2	2	2	2	2	2
2	1	2006-12-25	12	2	1	2	0	5	2	2	2	1	1	1	2	2	1	2	#NULL!	3	2	2	2	2	2	2	2	2	2	2	2	2	1	2	#NULL!	1	1	36	3	2	2	2	2	2	2	2	2	2	2
1	6	2004-11-06	15	3	2	2	0	3	1	1	2	1	2	2	2	2	1	1	46	4	2	2	2	2	2	2	2	2	2	2	2	2	2	1	#NULL!	1	1	40	4	2	2	2	2	2	2	2	2	2	2
2	3	2005-04-21	14	2	2	2	0	5	1	1	1	1	2	2	2	2	1	1	37	3	2	2	2	2	2	2	2	2	2	2	2	2	2	1	#NULL!	1	1	36	2	2	2	2	2	2	2	2	2	2	2
2	3	2006-03-09	13	2	2	2	0	4	2	2	2	2	1	1	2	2	1	1	36	3	2	2	2	2	2	2	2	2	2	2	2	2	2	1	#NULL!	1	1	35	2	2	2	2	2	2	2	2	2	2	2
2	1	2005-11-13	14	2	2	2	0	5	1	1	1	1	2	2	2	2	1	1	40	4	2	2	2	2	2	2	2	2	2	2	2	2	2	1	#NULL!	1	2	#NULL!	3	2	2	2	2	2	2	2	2	2	2
2	1	2006-06-05	13	2	1	2	0	3	1	1	1	2	2	2	2	2	1	1	43	2	2	2	2	2	2	2	2	2	2	2	2	2	2	1	#NULL!	1	1	42	4	2	2	2	2	2	2	2	2	2	2
2	5	2005-04-14	14	2	2	2	0	2	2	2	2	2	2	1	2	2	1	2	#NULL!	4	2	2	2	2	2	2	2	2	2	2	2	2	2	1	#NULL!	1	2	#NULL!	2	2	2	2	2	2	2	2	2	2	2
2	1	2004-08-06	15	3	2	2	0	6	1	1	1	1	2	2	2	2	1	1	41	3	2	2	2	2	2	2	2	2	2	2	2	2	2	1	#NULL!	1	1	37	1	2	2	2	2	2	2	2	2	2	2
2	6	2003-12-19	15	3	2	2	0	5	1	1	1	1	2	2	2	2	1	1	36	2	2	2	2	2	2	2	2	2	2	2	2	2	2	1	#NULL!	1	1	37	2	2	2	2	2	2	2	2	2	2	2
2	2	2003-12-24	15	3	2	2	0	2	1	1	2	2	2	2	2	2	1	1	48	4	2	1	2	2	2	2	2	2	2	2	2	2	2	2	#NULL!	1	1	45	3	2	2	2	2	2	2	2	2	2	2
2	1	2004-03-23	15	3	2	2	0	3	1	1	2	1	2	2	2	2	1	1	40	1	2	2	2	2	2	2	2	2	2	2	2	2	1	2	#NULL!	1	1	39	1	2	2	2	2	2	2	2	2	2	2
2	1	2003-07-26	16	3	2	2	0	3	1	1	2	1	2	2	2	2	1	1	43	3	2	2	2	2	2	2	2	2	2	2	2	2	2	1	#NULL!	1	1	40	3	2	2	2	2	2	2	2	2	2	2
1	1	2003-04-01	16	3	2	2	1	4	1	1	2	1	2	2	2	2	1	1	43	2	2	2	2	2	2	2	2	2	2	1	2	2	2	2	#NULL!	1	1	45	1	2	2	2	2	2	2	2	2	2	1
2	3	2002-04-27	17	3	2	2	0	6	1	1	1	1	2	2	2	2	1	1	41	1	2	2	2	2	2	2	2	2	2	2	2	2	2	1	#NULL!	1	1	41	1	2	2	1	2	2	2	2	2	2	2
2	6	2006-06-06	13	2	1	1	0	2	1	1	2	2	2	2	2	2	1	1	43	5	2	2	2	2	2	2	2	2	2	2	2	2	2	1	#NULL!	1	1	40	5	2	2	2	2	2	2	2	2	2	2
2	1	2006-07-01	13	2	2	2	0	2	1	1	2	2	2	2	2	2	1	1	49	3	2	2	2	2	2	2	2	2	2	2	2	2	1	2	#NULL!	1	1	48	2	2	2	2	2	2	2	2	2	2	2
2	3	2004-08-31	15	2	2	2	1	8	2	2	2	2	2	1	2	2	2	#NULL!	#NULL!	#NULL!	#NULL!	#NULL!	#NULL!	#NULL!	#NULL!	#NULL!	#NULL!	#NULL!	#NULL!	#NULL!	#NULL!	#NULL!	#NULL!	#NULL!	8	2	#NULL!	#NULL!	#NULL!	#NULL!	#NULL!	#NULL!	#NULL!	#NULL!	#NULL!	#NULL!	#NULL!	#NULL!	#NULL!
2	3	2005-11-27	14	2	2	2	0	3	2	2	1	1	2	2	2	2	1	2	#NULL!	2	2	2	2	2	2	2	2	2	2	2	2	2	2	1	#NULL!	1	2	#NULL!	2	2	2	2	2	2	2	2	2	2	2
1	1	2005-12-27	13	2	2	1	1	2	1	1	2	2	2	2	2	2	1	1	40	4	2	2	2	2	2	2	2	2	2	2	2	2	2	1	#NULL!	1	1	42	4	2	2	2	2	2	2	2	2	2	2
2	6	2004-03-02	15	3	2	2	1	5	1	1	1	1	2	2	2	2	1	1	36	3	2	2	2	2	1	2	2	2	2	2	2	2	2	2	#NULL!	1	1	35	2	2	2	2	2	2	2	2	2	2	2
2	3	2003-02-03	16	3	2	2	0	3	1	1	2	1	2	2	2	2	1	1	42	2	2	2	2	2	2	2	2	2	2	2	2	2	2	1	#NULL!	1	1	38	2	2	2	2	2	2	2	2	2	2	2
1	6	2003-10-20	16	3	2	2	0	4	2	2	1	2	2	1	2	2	1	2	#NULL!	3	2	2	2	2	2	2	2	2	2	2	2	2	2	1	#NULL!	1	2	#NULL!	2	2	2	2	2	2	2	2	2	2	2
1	1	2003-04-20	16	3	2	1	2	2	1	1	2	2	2	2	2	2	1	1	36	4	2	2	2	2	2	2	2	2	2	2	2	2	2	1	#NULL!	1	1	36	1	2	2	2	2	2	2	2	2	2	2
2	5	2004-01-03	15	3	2	2	0	6	1	1	1	1	2	2	2	2	1	2	#NULL!	3	2	2	2	2	2	2	2	2	2	2	2	2	2	1	#NULL!	1	2	#NULL!	0	2	2	2	2	2	2	2	2	2	2
1	6	2003-07-04	16	3	2	2	0	3	1	1	2	1	2	2	2	2	1	1	42	2	2	2	2	2	2	2	2	2	2	2	2	2	2	1	#NULL!	1	1	50	3	2	2	1	2	2	2	2	2	2	2
2	3	2003-03-18	16	3	2	2	0	1	1	2	2	2	2	2	2	2	1	1	53	2	2	2	2	2	2	2	2	2	2	2	2	2	1	2	#NULL!	1	1	53	0	2	2	2	2	2	2	2	2	2	2
2	5	2006-02-14	13	2	2	2	0	3	1	1	2	1	2	2	2	2	1	1	39	3	2	2	2	2	2	2	2	2	2	2	2	2	2	1	#NULL!	1	1	36	2	2	2	2	2	2	2	2	2	2	2
2	1	2006-06-26	13	2	2	2	0	4	1	1	2	1	2	2	2	2	1	1	43	3	2	2	2	2	2	2	2	2	2	2	2	2	2	1	#NULL!	1	1	42	3	2	2	2	2	2	2	2	2	2	2
2	1	2006-03-26	13	2	2	1	0	2	1	1	2	2	2	2	2	2	1	1	43	3	2	2	1	2	2	2	2	2	2	1	2	2	2	2	#NULL!	1	1	45	3	2	2	2	2	2	2	2	2	2	1
2	2	2006-01-09	13	2	2	2	0	2	1	1	2	2	2	2	2	2	1	1	51	0	2	2	2	2	2	2	2	2	2	2	2	2	2	1	#NULL!	1	1	49	0	2	2	2	2	2	2	2	2	2	2
2	6	2006-02-05	13	2	2	2	0	3	1	1	2	1	2	2	2	2	1	1	37	4	2	2	2	2	2	2	2	2	2	2	2	2	2	1	#NULL!	1	1	37	5	2	2	2	2	2	2	2	2	2	2
2	2	2002-10-11	17	3	2	2	0	3	1	1	2	1	2	2	2	2	1	1	44	4	2	2	2	2	2	1	2	2	2	2	2	2	2	2	#NULL!	1	1	41	2	2	2	2	2	2	2	2	2	2	2
2	5	2004-01-14	15	3	2	1	1	2	1	1	2	2	2	2	2	2	1	1	43	5	2	2	2	2	2	2	2	2	2	2	2	2	2	1	#NULL!	1	1	41	3	2	2	2	2	2	2	2	2	2	2
2	6	2003-07-09	16	3	2	1	1	2	1	1	2	2	2	2	2	2	1	1	43	5	2	2	1	2	2	2	2	2	2	2	2	2	2	2	#NULL!	1	1	44	5	2	2	2	2	2	2	2	2	2	2
2	3	2005-01-07	14	2	2	2	0	4	1	1	1	1	2	2	2	2	1	2	#NULL!	3	2	2	2	2	2	2	2	2	2	2	2	2	2	1	#NULL!	1	2	#NULL!	1	2	2	2	2	2	2	2	2	2	2
2	1	2006-02-17	13	2	2	2	0	5	1	1	1	1	2	2	2	2	1	1	39	3	2	2	2	2	2	2	2	2	2	2	2	2	2	1	#NULL!	1	1	33	3	2	2	2	2	2	2	2	2	2	2
2	1	2005-03-07	14	2	2	2	0	4	1	1	2	1	2	2	2	2	1	1	42	2	2	2	2	2	2	2	2	2	2	2	2	2	2	1	#NULL!	1	1	34	2	2	2	2	2	2	2	2	2	2	2
1	1	2005-10-18	14	2	2	2	0	2	1	1	2	2	2	2	2	2	1	2	#NULL!	4	2	2	2	2	2	2	2	2	2	2	2	2	2	1	#NULL!	1	2	#NULL!	3	2	2	2	2	2	2	2	2	2	2
1	3	2006-02-21	13	2	2	1	0	3	1	1	1	2	2	2	2	2	1	2	#NULL!	0	2	2	1	2	2	2	2	2	2	2	2	2	2	2	#NULL!	1	2	#NULL!	0	2	2	2	2	2	2	2	2	2	2
2	5	2006-02-15	13	2	1	1	1	1	1	2	2	2	2	2	2	2	2	#NULL!	#NULL!	#NULL!	#NULL!	#NULL!	#NULL!	#NULL!	#NULL!	#NULL!	#NULL!	#NULL!	#NULL!	#NULL!	#NULL!	#NULL!	#NULL!	#NULL!	10	1	1	42	4	2	2	2	2	2	2	2	2	2	2
2	3	2005-12-18	13	2	2	2	0	6	1	2	2	1	1	2	1	2	1	1	40	3	2	2	2	2	2	2	2	2	2	2	2	2	2	1	#NULL!	1	1	35	3	2	2	1	2	2	2	2	2	2	2
2	6	2005-12-28	13	2	2	2	0	2	2	2	2	2	2	1	2	2	1	1	44	3	2	2	2	2	2	2	2	2	2	2	2	2	2	1	#NULL!	1	1	47	2	2	2	2	2	2	2	2	2	2	2
2	1	2003-12-05	15	3	2	2	0	4	1	1	2	1	2	2	2	2	1	1	40	2	2	2	2	2	2	2	2	2	2	2	2	2	2	1	#NULL!	1	1	37	2	2	2	2	2	2	2	2	2	2	2
2	3	2004-03-21	15	3	2	2	0	5	1	1	1	1	2	2	2	2	1	1	39	3	2	2	2	2	2	2	2	2	2	2	2	2	2	1	#NULL!	1	1	38	1	2	2	2	2	2	2	2	2	2	2
2	1	2003-09-22	16	3	2	2	0	4	1	1	1	1	2	2	2	2	1	1	45	4	2	2	1	2	2	2	2	2	2	2	1	2	2	2	#NULL!	1	1	43	3	2	2	2	2	2	2	2	2	2	2
2	3	2004-01-09	15	3	2	1	1	4	1	1	1	2	2	2	1	2	1	1	48	5	2	2	2	2	2	2	2	2	2	2	2	2	2	1	#NULL!	1	1	43	4	2	2	2	2	2	2	2	2	2	2
2	6	2004-01-01	15	3	2	2	0	5	1	1	1	1	2	2	2	2	1	2	#NULL!	2	2	2	2	2	2	2	2	2	2	2	2	2	1	2	#NULL!	1	2	#NULL!	2	2	2	2	2	2	2	2	2	2	2
2	1	2004-02-13	15	3	2	2	0	5	1	1	1	1	2	2	2	2	1	1	41	3	2	2	2	2	2	2	2	2	2	2	2	2	2	1	#NULL!	1	1	40	2	2	2	2	2	2	2	2	2	2	2
1	6	2002-10-22	17	3	2	1	2	2	2	2	1	2	2	2	2	2	1	1	40	3	2	2	2	2	2	2	2	2	2	2	2	2	2	1	#NULL!	1	1	39	4	2	2	2	2	2	2	2	2	2	2
2	6	2004-06-27	15	3	2	2	1	5	1	1	1	1	2	2	2	2	1	1	45	2	2	2	2	2	2	2	2	2	2	2	2	2	2	1	#NULL!	1	1	41	4	2	2	2	2	2	2	2	2	2	2
2	6	2004-12-10	14	3	2	2	1	3	1	1	2	1	2	2	2	2	1	1	43	0	2	2	2	2	2	2	2	2	2	2	2	2	2	1	#NULL!	1	1	35	0	2	2	2	2	2	2	2	2	2	2
2	5	2003-10-04	16	3	2	2	0	3	1	1	2	1	2	2	2	2	1	1	53	3	2	2	2	2	1	2	2	2	2	1	2	2	2	2	#NULL!	1	1	46	1	2	2	2	2	1	2	2	2	2	2
2	1	2003-08-04	16	3	2	2	1	1	2	2	2	1	2	2	2	2	1	1	46	2	2	2	2	2	2	2	2	2	2	2	2	2	2	1	#NULL!	1	1	44	3	2	2	2	2	2	2	2	2	2	1
2	3	2004-05-03	15	3	2	2	0	4	1	1	1	1	2	2	2	2	1	1	41	1	2	2	2	2	2	2	2	2	2	2	2	2	2	1	#NULL!	1	1	45	1	2	2	2	2	2	2	2	2	2	1
2	6	2004-08-25	15	3	2	2	1	3	1	1	2	1	2	2	2	2	1	1	41	2	2	2	2	2	2	2	2	2	2	1	2	2	2	2	#NULL!	1	1	43	4	2	2	2	2	2	2	2	2	2	2
2	1	2003-05-08	16	3	2	2	0	3	1	1	2	1	2	2	2	2	1	1	40	2	2	2	2	2	2	2	2	2	2	2	2	2	2	1	#NULL!	1	1	42	2	2	2	2	2	2	2	2	2	2	2
2	6	2004-06-26	15	3	2	2	0	2	1	2	2	1	2	2	2	2	1	1	43	2	2	2	2	2	2	2	2	2	2	2	2	2	2	1	#NULL!	1	1	40	3	2	2	2	2	2	2	2	2	2	2
2	3	2002-09-19	17	3	2	2	0	3	1	1	2	1	2	2	2	2	1	1	40	4	2	2	2	2	2	2	2	2	2	2	2	2	2	1	#NULL!	1	1	39	2	2	2	2	2	2	2	2	2	2	2
2	1	2006-04-26	13	2	2	2	0	5	1	1	1	1	2	2	2	2	1	1	42	4	2	2	2	2	2	2	2	2	2	2	2	2	2	1	#NULL!	1	1	40	2	2	2	2	2	2	2	2	2	2	2
2	1	2006-08-21	13	2	2	2	0	4	1	1	1	1	2	2	2	2	1	1	37	3	2	2	2	2	2	2	2	2	2	2	2	2	2	1	#NULL!	1	1	36	3	2	2	2	2	2	2	2	2	2	2
2	3	2006-04-22	13	2	1	1	0	3	1	1	1	2	2	2	2	2	1	1	47	4	2	2	2	2	2	2	2	2	2	2	2	2	2	1	#NULL!	1	1	43	5	2	2	2	2	2	2	2	2	2	2
2	1	2005-07-31	14	2	1	1	0	2	1	1	2	2	2	2	2	2	1	1	44	5	2	2	2	2	2	2	2	2	2	2	2	2	2	1	#NULL!	1	1	43	3	2	2	2	2	2	2	2	2	2	2
1	3	2003-11-09	16	3	2	2	1	2	1	2	2	1	2	2	2	2	1	1	50	4	2	2	2	2	2	2	2	2	2	2	2	2	2	1	#NULL!	1	1	49	2	2	2	2	2	2	2	2	2	2	2
1	6	2005-11-12	14	2	2	2	0	5	1	1	1	1	2	2	2	2	1	1	39	0	2	2	2	2	2	2	2	2	2	2	2	2	2	1	#NULL!	1	1	35	2	2	2	2	2	2	2	2	2	2	2
2	1	2006-08-25	13	2	2	2	0	2	1	1	2	2	2	2	2	2	1	1	43	2	2	2	2	2	2	2	2	2	2	2	2	2	2	1	#NULL!	1	1	43	2	2	2	2	2	2	2	2	2	2	2
2	1	2005-11-16	14	2	1	1	0	2	1	1	2	2	2	2	2	2	1	1	41	4	2	2	2	2	2	2	2	2	2	2	2	2	2	1	#NULL!	1	1	40	3	2	2	2	2	1	2	2	2	2	2
1	2	2006-06-22	13	2	2	1	0	2	1	1	2	2	2	2	2	2	1	1	42	0	2	2	2	2	2	2	2	2	2	2	2	2	2	1	#NULL!	1	1	42	0	2	2	2	2	2	2	2	2	2	2
1	5	2006-08-01	13	2	2	1	0	4	1	1	1	2	2	2	2	2	1	1	40	5	2	2	2	2	2	2	2	2	2	2	2	2	2	1	#NULL!	1	1	46	5	2	2	2	2	2	2	2	2	2	2
1	3	2006-06-10	13	2	2	2	1	3	1	2	2	1	2	2	2	2	1	1	43	3	2	2	2	2	2	2	2	2	2	2	2	2	2	1	#NULL!	1	1	39	2	2	2	2	2	2	2	2	2	2	2
1	1	2005-11-06	14	2	1	1	2	2	1	1	2	2	2	2	2	2	1	1	41	3	2	2	2	2	2	2	2	2	2	2	2	2	2	1	#NULL!	1	1	39	5	2	2	2	2	2	2	2	2	2	2
1	1	2006-11-11	13	2	1	1	0	2	1	1	2	2	2	2	2	2	1	1	42	5	2	2	2	2	2	2	2	2	2	2	2	2	2	1	#NULL!	1	1	38	5	2	2	2	2	2	2	2	2	2	2
1	1	2005-09-19	14	2	2	1	1	1	1	2	2	2	2	2	2	2	1	2	#NULL!	4	2	2	2	2	2	2	2	2	2	2	2	2	1	2	#NULL!	1	1	38	3	2	2	2	2	2	2	2	2	2	2
1	1	2005-08-22	14	2	2	2	0	3	1	1	2	1	2	2	2	2	1	1	44	2	2	2	2	2	2	2	2	2	2	2	2	2	2	1	#NULL!	1	1	42	2	2	2	2	2	2	2	2	2	2	2
1	1	2007-05-11	12	2	2	1	1	4	1	1	1	2	2	2	2	2	1	1	41	5	2	2	2	2	2	2	2	2	2	2	2	2	2	1	#NULL!	1	1	40	4	2	2	2	2	2	2	2	2	2	2
2	1	2005-08-01	14	2	2	1	0	1	2	1	2	2	2	2	2	2	1	1	41	4	1	2	2	2	2	2	2	2	2	2	2	2	2	2	#NULL!	1	1	39	4	2	2	2	2	2	2	2	2	2	2
1	3	2004-09-08	15	3	2	2	1	2	1	1	2	2	2	2	2	2	1	1	40	4	2	2	2	2	2	2	2	2	2	2	2	2	1	2	#NULL!	1	1	39	2	2	2	2	2	2	2	2	2	2	2
1	1	2003-05-17	16	3	2	2	0	3	1	1	2	1	2	2	2	2	1	1	43	3	2	2	2	2	2	2	2	2	2	2	2	2	2	1	#NULL!	1	1	40	3	2	2	2	2	2	2	2	2	2	2
1	6	2003-12-28	15	3	2	2	1	2	1	1	2	2	2	2	2	2	1	1	53	3	2	2	2	2	2	2	2	2	2	2	2	2	2	1	#NULL!	1	1	41	5	2	2	2	2	2	2	2	2	2	2
1	1	2002-12-24	16	3	2	2	0	3	1	1	2	1	2	2	2	2	1	1	50	4	2	2	1	2	2	2	2	2	2	2	2	2	2	2	#NULL!	1	1	45	2	2	2	1	2	2	2	2	2	2	2
2	1	2005-09-18	14	2	2	2	1	5	1	1	1	1	2	2	2	2	1	1	43	2	2	2	2	2	2	2	2	2	2	2	2	2	2	1	#NULL!	1	1	42	2	2	2	2	2	2	2	2	2	2	2
1	1	2005-12-07	13	2	2	1	0	1	1	2	2	2	2	2	2	2	1	2	#NULL!	0	2	2	2	2	2	2	2	2	2	2	2	2	2	1	#NULL!	1	1	39	2	2	2	2	2	2	2	2	2	2	2
2	6	2006-08-09	13	2	2	1	0	3	1	1	1	2	2	2	2	2	1	1	42	0	2	2	1	2	2	2	2	2	2	2	2	2	2	2	#NULL!	1	1	40	5	2	2	2	2	2	2	2	2	2	2
1	3	2003-09-13	16	3	2	2	1	5	1	1	1	1	2	2	2	2	1	1	42	1	2	2	2	2	2	2	2	2	2	2	2	2	2	1	#NULL!	1	1	38	1	2	2	2	2	2	2	2	2	2	2
2	3	2004-02-01	15	3	2	2	0	3	1	1	2	1	2	2	2	2	1	1	41	2	2	2	2	2	2	2	2	2	2	2	2	2	2	1	#NULL!	1	1	37	2	2	2	2	2	2	2	2	2	2	2
1	3	2005-01-03	14	3	2	1	0	4	1	1	1	2	1	2	2	2	1	1	43	5	2	2	2	2	2	2	2	2	2	2	2	2	1	2	#NULL!	1	1	41	4	2	2	2	2	2	2	2	2	2	2
1	3	2003-02-15	16	3	2	2	1	2	1	1	2	2	2	2	2	2	1	2	#NULL!	1	2	2	2	2	2	2	2	2	2	2	2	2	2	1	#NULL!	1	2	#NULL!	2	2	2	1	2	2	2	2	2	2	2
1	3	2006-03-08	13	2	2	1	0	3	1	1	1	2	2	2	2	2	1	1	42	3	2	2	2	2	2	2	2	2	2	2	2	2	2	1	#NULL!	1	1	37	3	2	2	2	2	2	2	2	2	2	2
1	1	2005-10-04	14	2	2	2	0	3	1	2	1	1	2	2	2	2	1	2	#NULL!	4	2	2	2	2	2	2	2	2	2	2	2	2	2	1	#NULL!	1	2	#NULL!	4	2	2	2	2	2	2	2	2	2	2
2	3	2005-08-19	14	2	2	2	1	3	2	2	1	2	1	2	2	2	1	1	33	4	2	2	2	2	2	2	2	2	2	2	2	2	2	1	#NULL!	1	1	32	3	2	2	2	2	2	2	2	2	2	2
2	5	2005-11-30	14	2	2	1	1	3	1	1	2	2	1	2	2	2	1	2	#NULL!	4	2	2	2	2	2	2	2	2	2	1	2	2	2	2	#NULL!	1	1	39	4	2	2	2	2	2	2	2	2	2	2
1	1	2002-07-02	17	3	2	2	0	2	1	1	2	2	2	2	2	2	1	1	50	3	2	2	2	2	2	2	2	2	2	2	2	2	2	1	#NULL!	1	1	45	2	2	2	2	2	2	2	2	2	2	2
2	5	2003-05-08	16	3	2	2	0	2	1	1	2	2	2	2	2	2	1	1	48	3	2	2	2	2	2	2	2	2	2	2	2	2	2	1	#NULL!	1	1	45	2	2	2	2	2	2	2	2	2	2	2
1	1	2003-05-30	16	3	2	2	2	1	2	2	2	1	2	2	2	2	1	2	#NULL!	4	2	2	2	2	2	2	2	2	2	2	2	2	2	1	#NULL!	1	1	38	3	2	2	2	2	2	2	2	2	2	2
2	5	2003-08-27	16	3	2	2	0	5	2	2	1	1	2	2	2	2	1	1	45	1	2	2	2	2	2	2	2	2	2	2	2	2	2	1	#NULL!	1	1	38	3	2	2	2	2	2	2	2	2	2	2
1	1	2003-04-02	16	3	2	1	0	4	1	2	1	2	2	2	2	2	1	2	#NULL!	3	2	2	2	2	2	2	2	2	2	2	2	2	2	1	#NULL!	1	2	#NULL!	3	2	2	2	2	2	2	2	2	2	2
2	3	2004-02-25	15	3	2	2	0	2	1	1	2	2	2	2	2	2	1	1	47	3	2	2	2	2	2	2	2	2	2	2	2	2	2	1	#NULL!	1	1	48	3	2	2	2	2	2	2	2	2	2	2
2	3	2004-07-13	15	2	2	2	0	4	1	1	2	1	2	2	2	2	1	1	39	2	2	2	2	2	2	2	2	2	2	2	2	2	2	1	#NULL!	1	1	38	2	2	2	1	2	2	2	2	2	2	2
2	1	2005-10-20	14	2	2	2	0	4	1	1	1	1	2	2	2	2	1	1	46	2	2	2	2	2	2	2	2	2	2	2	2	2	2	1	#NULL!	1	1	44	3	2	2	2	2	2	2	2	2	2	2
2	3	2005-12-13	13	2	2	2	1	5	1	1	1	1	2	2	2	2	1	1	36	2	2	2	2	2	2	2	2	2	2	2	2	2	2	1	#NULL!	1	1	37	2	2	2	2	2	2	2	2	2	2	2
1	6	2006-02-04	13	2	2	1	0	4	1	1	1	2	2	2	2	2	1	1	42	5	2	2	2	2	2	2	2	2	2	2	2	2	2	1	#NULL!	1	1	39	5	2	2	2	2	2	2	2	2	2	2
1	1	2005-06-14	14	2	2	2	0	3	2	2	1	1	1	2	2	2	1	1	39	2	2	2	2	2	2	2	2	2	2	2	2	2	2	1	#NULL!	1	1	37	2	2	2	2	2	2	2	2	2	2	2
2	3	2002-12-02	17	3	2	2	0	5	1	1	2	1	2	2	2	2	1	1	39	2	1	2	2	2	2	2	2	2	2	2	2	2	2	2	#NULL!	1	1	41	2	2	2	2	2	2	2	2	2	2	2
1	5	2004-03-20	15	3	2	2	0	3	1	1	2	1	2	2	2	2	1	2	#NULL!	3	2	2	2	2	2	2	2	2	2	2	2	2	2	1	#NULL!	1	2	#NULL!	2	2	2	2	2	2	2	2	2	2	2
2	1	2004-11-26	15	3	2	2	0	3	1	1	2	1	2	2	2	2	1	1	42	2	2	2	2	2	2	2	2	2	2	2	2	2	2	1	#NULL!	1	1	42	4	2	2	2	2	2	2	2	2	2	2
2	1	2003-12-19	15	3	2	2	0	2	2	2	2	2	2	1	2	2	1	1	40	4	2	2	2	2	2	2	2	2	2	2	2	2	1	2	#NULL!	1	1	38	2	2	2	2	2	2	2	2	2	2	2
2	1	2002-03-07	17	3	2	2	4	2	2	1	2	2	2	2	2	1	1	1	48	2	2	2	2	2	2	2	2	2	2	2	2	2	2	1	#NULL!	2	#NULL!	#NULL!	#NULL!	#NULL!	#NULL!	#NULL!	#NULL!	#NULL!	#NULL!	#NULL!	#NULL!	#NULL!	#NULL!
2	6	2004-03-16	15	3	2	1	0	4	1	1	1	2	2	2	2	2	1	1	44	4	2	2	2	2	2	2	2	2	2	2	2	2	2	1	#NULL!	1	1	42	4	2	2	2	2	2	2	2	2	2	2
1	6	2003-06-29	16	3	1	2	0	7	1	1	1	1	2	2	2	2	1	1	39	4	2	2	2	2	2	2	2	2	2	2	2	2	2	1	#NULL!	1	1	40	3	2	2	2	2	2	2	2	2	2	2
2	1	2005-08-25	14	2	2	2	0	4	2	1	1	1	2	2	2	2	1	1	43	3	2	2	2	2	2	2	2	2	2	2	2	2	2	1	#NULL!	1	1	39	3	2	2	2	2	2	2	2	2	2	2
1	3	2005-02-04	14	2	2	1	2	4	1	1	1	2	2	2	2	2	1	1	44	5	2	2	2	2	2	2	2	2	2	2	2	2	2	1	#NULL!	1	1	40	5	2	2	2	2	2	2	2	2	2	2
1	3	2006-01-09	13	2	2	1	0	3	1	1	1	2	2	2	2	2	1	1	46	4	2	2	2	2	2	2	2	2	2	2	2	2	2	1	#NULL!	1	1	46	4	2	2	2	2	2	2	2	2	2	2
2	1	2006-07-26	13	2	2	2	0	4	2	1	1	1	2	2	2	2	1	1	46	3	2	2	2	2	2	2	2	2	2	2	2	2	2	1	#NULL!	1	2	#NULL!	0	2	2	2	2	2	2	2	2	2	2
1	6	2006-03-28	13	2	1	1	1	4	1	1	1	2	2	2	2	2	1	1	43	3	2	2	2	2	2	2	2	2	2	2	2	2	2	1	#NULL!	1	1	41	4	2	2	2	2	2	2	2	2	2	2
1	3	2004-12-02	15	3	2	1	0	2	1	1	2	2	2	2	2	2	1	1	48	5	2	2	2	2	2	2	2	2	2	2	2	2	1	2	#NULL!	1	1	41	4	2	2	2	2	2	2	2	2	2	2
1	5	2003-12-25	15	3	2	2	0	4	1	1	1	1	2	2	2	2	1	1	42	3	2	2	2	2	2	2	2	2	2	1	2	2	2	2	#NULL!	1	1	41	2	2	2	2	2	2	2	2	2	2	1
1	1	2005-12-24	13	2	2	1	0	2	1	1	2	2	2	2	2	2	1	1	43	3	2	2	2	2	2	2	2	2	2	2	2	2	2	1	#NULL!	1	1	37	2	2	2	2	2	2	2	2	2	2	1
1	1	2006-05-15	13	2	2	1	0	2	1	1	2	2	2	2	2	2	1	2	#NULL!	5	2	2	1	2	2	2	2	2	2	2	2	2	2	2	#NULL!	1	2	#NULL!	5	2	2	2	2	2	2	2	2	2	2
2	6	2006-01-16	13	2	1	1	0	2	1	1	2	2	2	2	2	2	1	1	42	4	2	2	2	2	2	2	2	2	2	2	2	2	2	1	#NULL!	1	1	39	4	2	2	2	2	2	2	2	2	2	2
1	1	2006-04-26	13	2	2	2	0	5	1	1	1	1	2	2	2	2	1	2	#NULL!	0	2	2	2	2	2	2	2	2	2	2	2	2	2	1	#NULL!	1	2	#NULL!	5	2	2	2	2	2	2	2	2	2	2
2	6	2006-01-27	13	2	2	2	1	5	2	2	1	2	1	1	2	2	1	1	48	2	2	2	2	2	2	2	2	2	2	2	2	2	2	1	#NULL!	1	1	40	3	2	2	2	2	2	2	2	2	2	2
1	3	2006-06-12	13	2	2	2	0	3	1	1	2	1	2	2	2	2	1	1	40	4	2	2	2	2	2	2	2	2	2	2	2	2	2	1	#NULL!	1	1	40	4	2	2	2	2	2	2	2	2	2	2
2	3	2006-03-18	13	2	2	2	2	4	1	2	2	1	1	2	2	2	2	#NULL!	#NULL!	#NULL!	#NULL!	#NULL!	#NULL!	#NULL!	#NULL!	#NULL!	#NULL!	#NULL!	#NULL!	#NULL!	#NULL!	#NULL!	#NULL!	#NULL!	8	1	1	38	3	2	2	2	2	2	2	2	2	2	2
2	1	2006-05-16	13	2	2	2	0	6	1	1	1	2	2	2	2	2	1	1	41	2	2	2	2	2	2	2	2	2	2	2	2	2	2	1	#NULL!	1	1	38	3	2	2	2	2	2	2	2	2	2	2
2	1	2006-01-09	13	2	2	2	1	5	1	1	1	2	2	2	2	2	1	1	42	2	2	2	2	2	2	2	2	2	2	2	2	2	2	1	#NULL!	1	1	40	2	2	2	2	2	2	2	2	2	2	2
2	1	2006-02-20	13	2	2	2	0	2	1	1	2	2	2	2	2	2	1	1	41	2	2	2	2	2	2	2	2	2	2	2	2	2	2	1	#NULL!	1	1	42	1	2	2	2	2	2	2	2	2	2	2
2	1	2005-07-10	14	2	2	2	0	5	1	1	1	1	2	2	2	2	1	1	44	3	2	2	2	2	2	2	2	2	2	2	1	2	2	2	#NULL!	1	1	44	4	2	2	2	2	2	2	2	2	2	2
2	1	2006-02-19	13	2	1	1	1	2	1	1	2	2	2	2	2	2	1	1	42	4	2	2	2	2	2	2	2	2	2	2	2	2	2	1	#NULL!	1	1	41	2	2	2	2	2	2	2	2	2	2	2
1	1	2005-08-31	14	2	2	2	0	5	1	1	1	2	2	2	2	2	1	2	#NULL!	4	2	2	2	2	2	2	2	2	2	2	2	2	2	1	#NULL!	1	2	#NULL!	3	2	2	2	2	2	2	2	2	2	2
2	6	2006-02-21	13	2	1	2	0	4	1	1	2	1	2	2	2	2	1	1	40	3	2	2	2	2	2	2	2	2	2	2	2	2	2	1	#NULL!	1	1	36	3	2	2	2	2	2	2	2	2	2	2
1	1	2005-10-03	14	2	2	2	1	5	1	1	1	1	2	2	2	2	1	1	36	3	2	2	2	2	2	2	2	2	2	2	2	2	2	1	#NULL!	1	1	36	3	2	2	2	2	2	2	2	2	2	2
1	1	2005-10-20	14	2	2	2	0	3	1	1	2	1	2	2	2	2	1	1	40	5	2	2	2	2	2	2	2	2	2	2	2	2	2	1	#NULL!	1	1	40	3	2	2	2	2	2	2	2	2	2	2
2	1	2006-06-20	13	2	2	2	0	2	1	2	2	1	2	2	2	2	#NULL!	#NULL!	#NULL!	#NULL!	#NULL!	#NULL!	#NULL!	#NULL!	#NULL!	#NULL!	#NULL!	#NULL!	#NULL!	#NULL!	#NULL!	#NULL!	#NULL!	#NULL!	#NULL!	1	1	45	3	2	2	2	2	2	2	2	2	2	1
2	3	2004-02-01	15	3	2	2	0	4	1	2	1	2	2	2	2	2	1	1	43	2	2	2	2	2	2	2	2	2	2	2	2	2	2	1	#NULL!	1	1	42	3	2	2	2	2	2	2	2	2	2	2
2	3	2004-11-16	15	3	2	2	1	2	2	1	1	2	2	2	2	2	1	1	43	2	2	2	2	2	2	2	2	2	2	2	2	2	2	1	#NULL!	1	1	42	2	2	2	2	2	2	2	2	2	2	2
2	1	2004-05-12	15	3	2	2	0	4	1	1	2	1	2	2	2	2	1	2	#NULL!	3	2	2	2	2	2	2	2	2	2	2	2	2	2	1	#NULL!	1	2	#NULL!	0	2	2	2	2	2	2	2	2	2	2
2	5	2004-07-25	15	3	2	1	1	2	1	1	2	2	2	2	2	2	1	1	42	5	2	2	2	2	2	2	2	2	2	2	2	2	2	1	#NULL!	1	1	43	4	2	2	2	2	2	2	2	2	2	2
2	6	2003-04-06	16	3	2	2	0	3	1	1	2	1	2	2	2	2	1	1	50	2	2	2	2	2	1	2	2	2	2	2	2	2	2	2	#NULL!	1	1	49	1	2	2	2	2	2	2	2	2	2	1
2	3	2003-05-28	16	3	2	2	0	4	1	1	1	1	2	2	2	2	1	1	42	2	2	2	2	2	2	2	2	2	2	1	2	2	2	2	#NULL!	1	1	36	2	2	2	2	2	2	2	2	2	2	2
1	1	2005-04-06	14	3	2	2	0	4	1	1	2	1	1	2	2	2	1	1	43	1	2	1	2	2	2	2	2	2	2	2	2	2	2	2	#NULL!	1	1	38	2	2	2	2	2	2	2	2	2	2	2
1	1	2004-01-15	15	3	2	2	0	2	1	2	2	1	2	2	2	2	1	2	#NULL!	3	2	2	2	2	2	2	2	2	2	2	2	2	2	1	#NULL!	1	2	#NULL!	2	2	2	2	2	2	2	2	2	2	2
2	1	2003-06-16	16	3	2	2	0	5	1	1	2	1	2	2	2	2	1	1	45	0	2	2	2	2	2	2	2	2	2	2	2	2	2	1	#NULL!	1	1	47	4	2	2	2	2	2	2	2	2	2	2
2	3	2003-10-28	16	3	2	1	1	1	1	2	2	2	2	2	2	2	2	#NULL!	#NULL!	#NULL!	#NULL!	#NULL!	#NULL!	#NULL!	#NULL!	#NULL!	#NULL!	#NULL!	#NULL!	#NULL!	#NULL!	#NULL!	#NULL!	#NULL!	15	1	1	37	2	2	2	2	2	2	2	2	2	2	1
1	1	2003-02-08	16	3	2	2	2	3	1	1	1	2	2	2	2	2	1	2	#NULL!	3	2	2	2	2	2	2	2	2	2	2	2	2	2	1	#NULL!	1	2	#NULL!	3	2	2	2	2	2	2	2	2	2	2
2	6	2005-08-26	14	2	1	1	0	2	1	1	2	2	2	2	2	2	1	2	#NULL!	5	2	2	2	2	2	2	2	2	2	2	2	2	2	1	#NULL!	1	2	#NULL!	5	2	2	2	2	2	2	2	2	2	2
2	1	2003-06-09	16	3	2	1	0	2	2	2	1	2	2	1	2	2	1	1	45	3	2	2	2	2	2	2	2	2	2	1	2	2	2	2	#NULL!	1	1	39	3	2	2	2	2	2	2	2	2	2	2
2	1	2004-01-04	15	3	1	2	1	6	1	1	1	1	2	2	2	2	1	2	#NULL!	3	2	2	2	2	2	2	2	2	2	2	2	2	2	1	#NULL!	1	2	#NULL!	3	2	2	2	2	2	2	2	2	2	2
2	3	2004-02-20	15	3	2	2	0	2	1	1	2	2	2	2	2	2	1	1	42	3	2	2	2	2	2	2	2	2	2	2	2	2	1	2	#NULL!	1	1	42	2	2	2	2	2	2	2	2	2	2	2
2	1	2003-03-31	16	3	2	2	0	4	1	2	1	1	2	2	2	2	2	#NULL!	#NULL!	#NULL!	#NULL!	#NULL!	#NULL!	#NULL!	#NULL!	#NULL!	#NULL!	#NULL!	#NULL!	#NULL!	#NULL!	#NULL!	#NULL!	#NULL!	8	1	1	36	3	2	2	2	2	2	2	2	2	2	2
1	1	2002-12-17	16	3	2	2	0	4	1	1	2	1	2	2	2	2	1	1	48	2	2	2	2	2	2	2	2	2	2	2	2	2	2	1	#NULL!	1	1	35	2	2	2	2	2	2	2	2	2	2	2
1	6	2004-01-18	15	3	2	2	0	1	2	2	2	2	2	1	2	2	1	1	54	2	2	2	2	2	2	2	2	2	2	1	2	2	2	2	#NULL!	1	1	47	3	2	2	2	2	2	2	2	2	2	2
1	1	2002-12-11	16	3	2	2	1	3	1	2	2	1	2	2	2	2	1	1	49	2	2	2	2	2	2	2	2	2	2	2	2	2	2	1	#NULL!	1	1	39	1	2	2	2	2	2	2	2	2	2	2
1	1	2002-07-03	17	3	2	1	0	2	1	1	2	2	2	2	2	2	1	2	#NULL!	4	2	2	2	2	2	2	2	2	2	2	2	2	2	1	#NULL!	1	2	#NULL!	3	2	2	2	2	2	2	2	2	2	2
2	1	2002-09-20	17	3	2	1	0	1	1	2	2	2	2	2	2	2	1	1	43	3	2	2	2	2	2	2	2	2	2	2	2	2	2	1	#NULL!	1	1	37	1	2	2	2	2	2	2	2	1	2	2
2	1	2002-12-23	16	3	2	2	0	1	1	2	2	2	2	2	2	2	1	1	50	2	2	2	2	2	2	2	2	2	2	2	2	2	2	1	#NULL!	1	1	49	2	2	2	1	2	2	2	2	2	2	2
2	1	2002-08-06	17	3	2	2	0	5	1	1	2	1	2	2	2	2	1	2	#NULL!	3	2	2	2	2	2	2	2	2	2	2	2	2	1	2	#NULL!	1	1	34	2	2	2	2	2	2	2	2	2	2	2
2	1	2003-11-14	16	3	2	2	0	7	1	1	1	1	2	2	2	2	1	1	45	2	2	2	2	2	2	2	2	2	2	2	2	2	2	1	#NULL!	1	1	42	2	2	2	2	2	2	2	2	2	2	2
1	1	2002-03-22	17	3	2	2	0	3	1	1	2	1	2	2	2	2	1	1	44	2	2	2	2	2	2	2	2	2	2	2	2	2	1	2	#NULL!	1	1	44	2	2	2	2	2	2	2	2	2	2	2
1	1	2003-10-10	16	3	2	2	0	3	1	1	2	1	2	2	2	2	1	1	41	2	2	2	2	2	2	2	2	2	2	2	2	2	2	1	#NULL!	1	1	41	1	2	2	2	2	2	2	2	2	2	2
2	1	2003-07-05	16	3	2	2	0	5	2	2	2	1	2	1	2	2	1	1	39	3	2	2	1	2	1	2	2	2	2	2	2	2	2	2	#NULL!	1	1	38	2	2	2	1	2	2	2	2	2	2	2
2	1	2004-09-02	15	3	2	2	0	3	1	1	2	1	2	2	2	2	1	1	39	2	2	2	2	2	2	2	2	2	2	2	2	2	2	1	#NULL!	1	1	37	2	2	2	2	2	2	2	2	2	2	2
2	1	2003-04-04	16	3	2	2	1	2	2	2	1	2	2	2	2	2	1	1	43	3	2	2	2	2	2	2	2	2	2	2	2	2	2	1	#NULL!	1	1	41	2	2	2	2	2	2	2	2	2	2	2
1	5	2004-06-21	15	3	2	2	0	1	2	2	1	2	2	2	2	2	1	1	50	5	2	2	2	2	2	2	2	2	2	2	2	2	2	1	#NULL!	1	1	44	4	2	2	2	2	2	2	2	2	2	2
2	6	2003-09-24	16	3	2	2	2	4	1	1	1	1	2	2	2	2	1	1	43	3	2	2	2	2	2	2	2	2	2	1	2	2	2	2	#NULL!	1	1	45	3	2	2	2	2	2	2	2	2	2	2
2	1	2003-11-02	16	3	2	2	1	5	1	1	1	1	2	2	2	2	1	1	40	0	2	2	1	2	2	2	2	2	2	2	2	2	2	2	#NULL!	1	1	41	4	2	2	2	2	2	2	2	2	2	2
2	1	2002-01-19	17	3	2	2	1	3	1	1	1	2	2	2	2	2	1	1	46	2	2	2	2	2	2	2	2	2	2	2	2	2	2	1	#NULL!	1	1	44	2	2	2	1	2	2	2	2	2	2	2
2	1	2003-04-03	16	3	2	2	0	3	1	1	2	1	2	2	2	2	1	1	52	4	2	2	2	2	2	2	2	2	2	2	2	2	2	1	#NULL!	1	1	38	2	2	2	1	2	2	2	2	2	2	2
1	1	2003-12-18	15	3	2	2	1	2	1	1	2	2	2	2	2	2	1	2	#NULL!	3	2	2	2	2	2	2	2	2	2	2	2	2	2	1	#NULL!	1	2	#NULL!	0	2	2	2	2	2	2	2	2	2	2
2	1	2003-11-16	16	3	2	1	1	1	1	2	2	2	2	2	2	2	1	1	49	5	2	2	2	2	2	2	2	2	2	2	2	2	2	1	#NULL!	1	1	43	2	2	2	2	2	2	2	2	2	2	2
1	1	2003-12-25	15	3	2	2	1	4	1	1	1	1	2	2	2	2	1	1	43	2	2	2	2	2	2	2	2	2	2	1	2	2	2	2	#NULL!	1	1	43	4	2	2	2	2	2	2	2	2	2	1
1	1	2002-11-28	17	3	2	2	1	2	1	1	2	2	2	2	2	2	1	1	48	4	2	2	2	2	2	2	2	2	2	2	2	2	2	1	#NULL!	1	1	46	4	2	2	2	2	2	2	2	2	2	2
2	6	2003-07-06	16	3	2	2	0	3	1	1	2	1	2	2	2	2	1	1	46	2	2	2	2	2	2	2	2	2	2	1	2	2	2	2	#NULL!	1	1	42	2	2	2	2	2	2	2	2	2	2	2
1	1	2003-08-04	16	3	2	2	0	4	1	1	1	1	2	2	2	2	1	1	40	3	2	2	2	2	2	2	2	2	2	2	2	2	2	1	#NULL!	1	1	39	4	2	2	2	2	2	2	2	2	2	2
2	1	2004-07-28	15	3	2	2	0	2	1	1	2	2	2	2	2	2	1	1	50	4	2	2	2	2	2	2	2	2	2	2	2	2	2	1	#NULL!	1	1	41	3	2	2	2	2	2	2	2	2	2	2
1	1	2002-06-23	17	3	2	2	0	3	1	1	2	1	2	2	2	2	1	1	44	2	2	2	2	2	2	2	2	2	2	2	2	2	2	1	#NULL!	1	1	44	2	2	2	2	2	2	2	2	2	2	2
2	1	2002-12-26	16	3	2	2	2	1	2	1	2	2	2	2	2	2	1	1	45	2	2	2	2	2	2	2	2	2	2	2	2	2	2	1	#NULL!	1	1	40	2	2	2	2	2	2	2	2	2	2	1
2	1	2004-07-14	15	3	2	2	2	2	1	2	2	1	2	2	2	2	1	2	#NULL!	3	2	2	2	2	2	2	2	2	2	2	2	2	2	1	#NULL!	1	1	46	2	2	2	2	2	2	2	2	2	2	2
2	3	2003-09-12	16	3	2	2	0	3	1	1	2	1	2	2	2	2	1	1	48	5	2	2	2	2	2	2	2	2	2	2	2	2	2	1	#NULL!	1	1	45	3	2	2	2	2	2	2	2	2	2	2
1	5	2003-09-26	16	3	2	2	0	5	1	1	1	1	2	2	2	2	1	1	41	2	2	2	2	2	2	2	2	2	2	2	2	2	2	1	#NULL!	1	1	40	4	2	2	2	2	2	2	2	2	2	2
1	1	2003-10-18	16	3	2	2	0	5	1	1	1	1	2	2	2	2	1	1	52	2	2	2	2	2	2	2	2	2	2	2	2	2	2	1	#NULL!	1	1	45	3	2	2	2	2	2	2	2	2	2	2
1	1	2003-03-07	16	3	2	2	0	4	1	1	1	1	2	2	2	2	1	1	46	2	2	2	2	2	2	2	2	2	2	2	2	2	2	1	#NULL!	1	1	46	2	2	2	2	2	2	2	2	2	2	2
1	5	2003-11-24	16	3	2	2	0	5	2	2	2	2	1	2	1	2	1	1	40	4	2	2	2	2	2	2	2	2	2	2	2	2	2	1	#NULL!	1	1	42	3	2	2	2	2	2	2	2	2	2	2
1	1	2003-11-06	16	3	2	2	0	5	1	1	1	2	1	2	2	2	1	1	42	2	2	2	2	2	2	2	2	2	2	2	2	2	2	1	#NULL!	1	1	41	3	2	2	2	2	2	2	2	2	2	2
2	6	2002-01-25	17	3	1	1	0	1	2	1	2	2	2	2	2	2	1	2	#NULL!	2	2	2	2	2	2	2	2	2	2	2	2	2	1	2	#NULL!	1	2	#NULL!	2	2	2	2	2	2	2	2	2	2	2
2	1	2003-12-26	15	3	2	2	0	4	1	1	1	2	2	1	2	2	1	2	#NULL!	2	2	2	2	2	2	2	2	2	2	2	2	2	2	1	#NULL!	1	2	#NULL!	3	2	2	2	2	2	2	2	2	2	2
1	6	2003-11-30	16	3	2	1	1	2	1	1	2	2	2	2	2	2	1	1	45	4	2	2	2	2	2	2	2	2	2	2	2	2	2	1	#NULL!	1	1	39	3	2	2	2	2	2	2	2	2	2	2
2	1	2003-03-17	16	3	2	2	0	4	2	1	1	1	2	2	2	2	1	1	39	2	2	2	2	2	2	2	2	2	2	2	2	2	2	1	#NULL!	1	2	#NULL!	3	2	2	2	2	2	2	2	2	2	2
1	1	2003-10-11	16	3	2	1	1	2	1	1	2	2	2	2	2	2	1	1	40	3	2	2	2	2	2	2	2	2	2	2	2	2	2	1	#NULL!	1	1	39	2	2	2	2	2	2	2	2	2	2	2
2	1	2003-06-12	16	3	2	2	0	4	2	2	1	1	2	2	2	2	1	1	39	2	1	2	2	2	2	2	2	2	2	2	2	2	2	2	#NULL!	1	1	37	2	2	2	2	2	2	2	2	2	2	2
2	1	2002-02-16	17	3	2	1	0	2	1	1	2	2	2	2	2	2	1	1	53	1	2	2	2	2	2	2	2	2	2	2	2	2	2	1	#NULL!	1	1	53	2	2	2	2	2	2	2	2	2	2	2
2	6	2003-12-19	15	3	2	1	1	4	1	1	1	2	2	2	2	2	1	1	46	4	2	2	2	2	2	2	2	2	2	2	2	2	2	1	#NULL!	1	1	44	4	2	2	2	2	2	2	2	2	2	2
1	1	2003-01-11	16	3	2	2	1	4	2	2	1	2	1	2	2	2	1	1	41	2	2	2	2	2	2	2	2	2	2	2	2	2	2	1	#NULL!	1	1	39	3	2	2	2	2	2	2	2	2	2	2
2	1	2001-12-13	17	3	2	2	2	3	1	1	2	1	2	2	2	2	1	1	42	2	2	2	1	2	2	2	2	2	2	1	2	2	1	2	#NULL!	1	1	43	1	2	2	1	2	2	2	2	2	2	1
1	6	2003-07-16	16	3	1	2	1	2	1	1	2	2	2	2	2	2	1	1	41	3	2	2	2	2	2	2	2	2	2	2	2	2	2	1	#NULL!	1	1	43	3	2	2	2	2	2	2	2	2	2	2
1	6	2002-10-03	17	3	2	1	0	2	1	1	2	2	2	2	2	2	1	1	45	2	2	2	2	2	2	2	2	2	2	2	2	2	2	1	#NULL!	1	1	47	2	2	2	1	2	2	2	2	2	2	2
2	6	2002-10-22	17	3	2	2	0	5	1	1	1	1	2	2	2	2	1	2	#NULL!	4	2	2	2	2	2	2	2	2	2	2	2	2	2	1	#NULL!	1	1	35	4	2	2	2	2	2	2	2	2	2	2
2	1	2003-06-18	16	3	2	2	0	1	1	2	2	2	2	2	2	2	1	1	47	3	2	2	2	2	2	2	2	2	2	2	2	2	2	1	#NULL!	1	1	47	2	2	2	2	2	2	2	2	2	2	2
2	3	2004-02-12	15	3	2	2	1	4	1	1	2	1	2	2	2	2	1	1	43	3	2	2	2	2	2	2	2	2	2	2	2	2	2	1	#NULL!	1	1	36	2	2	2	2	2	2	2	2	2	2	2
1	1	2002-06-20	17	3	2	2	1	4	1	1	1	1	2	2	2	2	1	1	45	4	2	2	2	2	2	2	2	2	2	2	2	2	2	1	#NULL!	1	1	45	2	2	2	2	2	2	2	2	2	2	2
1	1	2004-04-07	15	3	2	2	0	8	1	2	1	1	2	2	1	2	1	1	50	2	2	2	1	2	2	2	2	2	2	2	2	2	2	2	#NULL!	1	1	50	4	2	2	2	2	2	2	2	2	2	1
1	3	2004-08-08	15	3	2	2	0	6	1	1	1	1	2	2	2	2	1	1	37	3	2	2	2	2	2	2	2	2	2	2	2	2	2	1	#NULL!	1	1	35	3	2	2	2	2	2	2	2	2	2	2
2	3	2002-10-11	17	3	2	2	1	3	2	2	2	1	2	2	2	2	1	1	44	2	2	2	2	2	1	2	2	2	2	2	2	2	2	2	#NULL!	1	1	42	2	2	2	2	2	2	2	2	2	2	2
2	1	2004-03-04	15	3	1	1	0	4	1	1	1	2	2	2	2	2	1	1	43	4	2	2	2	2	2	2	2	2	2	2	2	2	2	1	#NULL!	1	1	40	3	2	2	2	2	2	2	2	2	2	2
2	1	2003-10-17	16	3	2	1	0	2	1	1	2	2	2	2	2	2	1	1	53	2	2	2	2	2	2	2	2	2	2	2	2	2	2	1	#NULL!	1	1	46	3	2	2	2	2	2	2	2	2	2	2
2	1	2004-03-09	15	3	2	2	0	4	1	1	2	1	2	2	2	2	1	1	57	2	2	2	2	2	2	2	2	2	2	2	2	2	2	1	#NULL!	1	1	50	2	2	2	2	2	2	2	2	2	2	2
1	1	2003-11-01	16	3	2	2	0	5	1	1	1	1	2	2	2	2	1	1	42	3	2	2	2	2	2	2	2	2	2	2	2	2	2	1	#NULL!	1	1	38	3	2	2	2	2	2	2	2	2	2	2
1	6	2003-01-03	16	3	2	2	0	6	1	1	1	1	2	2	2	2	1	1	40	1	2	2	2	2	2	2	2	2	2	2	2	2	1	2	#NULL!	1	1	42	1	2	2	2	2	2	2	2	2	2	2
1	1	2002-09-03	17	3	2	2	0	2	2	1	2	1	2	2	2	2	1	2	#NULL!	2	2	2	2	2	2	2	2	2	2	1	2	2	2	2	#NULL!	1	2	#NULL!	2	2	2	2	2	2	2	2	2	2	2
1	1	2004-06-10	15	3	2	1	0	2	1	1	2	2	2	2	2	2	1	1	45	3	2	2	2	2	2	2	2	2	2	2	2	2	2	1	#NULL!	1	1	37	3	2	2	2	2	2	2	2	2	2	2
1	6	2003-05-04	16	3	2	2	1	4	1	1	2	2	1	2	2	2	1	1	47	2	2	2	2	2	2	2	2	2	2	2	2	2	2	1	#NULL!	1	1	50	1	2	2	2	2	2	2	2	2	2	2
1	1	2003-10-26	16	3	2	2	0	6	1	1	1	1	2	2	2	2	1	1	40	3	2	2	2	2	2	2	2	2	2	2	2	2	2	1	#NULL!	1	1	38	3	2	2	2	2	2	2	2	2	2	1
1	5	2003-11-13	16	3	2	2	0	3	1	1	2	1	2	2	2	2	1	2	#NULL!	2	2	2	2	2	2	2	2	2	2	2	2	2	1	2	#NULL!	1	2	#NULL!	3	2	2	2	2	2	2	2	2	2	2
1	1	2002-09-18	17	3	2	2	3	3	1	1	2	1	2	2	2	2	1	2	#NULL!	2	2	2	2	2	2	2	2	2	2	2	2	2	2	1	#NULL!	1	2	#NULL!	2	2	2	2	2	2	2	2	2	2	2
2	1	2003-04-28	16	3	1	2	0	2	1	1	2	2	2	2	2	2	1	2	#NULL!	3	2	2	1	2	2	2	2	2	2	2	2	2	2	2	#NULL!	1	1	53	2	2	2	2	2	2	2	2	2	2	1
2	1	2002-09-19	17	3	2	2	0	3	1	1	2	1	2	2	2	2	1	1	45	2	2	2	1	2	2	2	2	2	2	1	2	2	2	2	#NULL!	1	1	42	1	2	2	1	2	2	2	2	2	2	1
2	1	2003-12-13	15	3	2	2	0	4	1	1	1	1	2	2	2	2	1	1	41	3	2	2	2	2	2	2	2	2	2	1	2	2	2	2	#NULL!	1	1	40	3	2	2	2	2	2	2	2	2	2	1
2	1	2002-06-05	17	3	2	2	0	1	2	1	2	2	2	2	2	2	1	1	52	2	2	2	2	2	2	2	2	2	2	2	2	2	2	1	#NULL!	1	1	45	2	2	2	2	2	2	2	2	2	2	2
1	1	2004-07-22	15	3	2	1	0	3	1	1	1	2	2	2	2	2	1	1	41	3	2	2	2	2	2	2	2	2	2	2	2	2	2	1	#NULL!	1	1	36	2	2	2	2	2	2	2	2	2	2	2
1	1	2003-09-17	16	3	2	1	0	2	1	1	2	2	2	2	2	2	1	1	39	2	2	2	2	2	2	2	2	2	2	2	2	2	2	1	#NULL!	1	1	38	2	2	2	2	2	2	2	2	1	2	2
1	1	2003-10-04	16	3	2	1	1	5	1	1	1	2	1	2	1	2	1	1	41	2	2	2	2	2	2	2	2	2	2	2	2	2	2	1	#NULL!	1	1	37	3	2	2	2	2	2	2	2	2	2	2
1	5	2002-02-24	17	3	2	2	0	5	1	1	1	1	2	2	2	2	1	1	39	3	2	2	2	2	2	2	2	2	2	2	2	2	2	1	#NULL!	1	1	38	2	2	2	2	2	2	2	2	2	2	2
1	1	2002-03-18	17	3	1	1	0	4	1	1	1	2	2	2	2	2	1	1	45	3	2	2	2	1	2	2	2	2	2	2	2	2	2	2	#NULL!	1	1	42	3	2	2	2	2	2	2	2	2	2	2
2	3	2003-07-15	16	3	2	2	1	3	1	1	2	1	2	2	2	2	1	1	45	3	2	2	2	2	2	2	2	2	2	2	2	2	2	1	#NULL!	1	1	36	2	2	2	2	2	2	2	2	2	2	2
2	1	2003-07-20	16	3	2	2	1	3	2	2	2	2	1	2	1	2	1	1	48	2	2	2	2	2	2	2	2	2	2	2	2	2	2	1	#NULL!	1	1	45	2	2	2	2	2	2	2	2	2	2	2
2	1	2003-07-09	16	3	2	2	0	4	1	1	1	1	2	2	2	2	1	1	40	2	2	2	2	2	2	2	2	2	2	2	2	2	1	2	#NULL!	1	1	39	2	2	2	2	2	2	2	2	2	2	2
1	1	2002-10-19	17	3	2	2	0	3	1	1	2	2	2	2	1	2	1	2	#NULL!	0	2	2	2	2	2	2	2	2	2	2	2	2	2	1	#NULL!	1	2	#NULL!	0	2	2	2	2	2	2	2	2	2	2
2	1	2002-04-09	17	3	2	2	0	3	1	1	2	1	2	2	2	2	1	2	#NULL!	3	2	2	2	2	2	2	2	2	2	2	2	2	2	1	#NULL!	1	2	#NULL!	2	2	2	2	2	2	2	2	2	2	2
2	1	2002-02-15	17	3	2	2	0	3	1	2	1	2	2	2	2	2	1	1	45	2	2	2	2	2	2	2	2	2	2	2	2	2	2	1	#NULL!	1	1	47	2	2	2	2	2	2	2	2	2	2	2
2	1	2002-04-26	17	3	1	1	0	6	1	1	1	2	2	1	2	2	1	2	#NULL!	4	2	2	2	2	2	2	2	2	2	2	2	2	2	1	#NULL!	1	2	#NULL!	2	2	2	2	2	2	2	2	2	2	2
1	1	2005-01-26	14	3	2	2	1	6	2	1	2	1	1	1	2	2	1	2	#NULL!	0	2	2	2	2	2	2	2	2	2	2	2	2	2	1	#NULL!	1	2	#NULL!	0	2	2	2	2	2	2	2	2	2	2
2	3	2004-03-10	15	3	2	2	0	2	1	1	2	2	2	2	2	2	1	1	56	2	2	2	2	2	2	2	2	2	2	2	2	2	2	1	#NULL!	1	1	52	1	2	2	2	2	2	2	2	2	2	2
2	1	2003-10-01	16	3	2	1	0	2	1	2	2	2	2	1	2	2	2	#NULL!	#NULL!	#NULL!	#NULL!	#NULL!	#NULL!	#NULL!	#NULL!	#NULL!	#NULL!	#NULL!	#NULL!	#NULL!	#NULL!	#NULL!	#NULL!	#NULL!	6	1	2	#NULL!	3	2	2	2	2	2	2	2	2	2	2
1	3	2002-08-10	17	3	2	2	1	3	1	1	2	1	2	2	2	2	1	2	#NULL!	1	2	2	2	2	2	2	2	2	2	2	2	2	2	1	#NULL!	1	2	#NULL!	2	2	2	1	2	2	2	2	2	2	2
2	6	2002-08-27	17	3	2	2	0	4	1	1	1	1	2	2	2	2	1	1	42	4	2	2	2	2	2	2	2	2	2	2	2	2	2	1	#NULL!	1	1	39	2	2	2	2	2	2	2	2	2	2	2
2	1	2002-12-28	16	3	2	2	0	3	1	1	2	1	2	2	2	2	1	1	38	2	2	2	2	2	2	1	2	2	2	2	2	2	2	2	#NULL!	1	1	39	2	2	2	2	2	2	2	2	2	2	2
1	1	2003-08-03	16	3	1	1	2	2	1	1	2	2	2	2	2	2	1	1	58	3	2	2	2	2	2	2	2	2	2	2	2	2	2	1	#NULL!	1	1	53	4	2	2	2	1	2	2	2	2	2	2
1	1	2004-03-21	15	3	2	1	0	2	2	2	1	2	1	2	1	2	1	1	42	3	2	2	2	2	2	2	2	2	2	2	2	2	2	1	#NULL!	1	1	38	5	2	2	2	2	2	2	2	2	2	2
1	1	2003-08-10	16	3	2	2	0	3	1	1	2	2	1	2	2	2	1	1	43	2	2	2	2	2	2	2	2	2	2	2	2	2	1	2	#NULL!	1	1	42	1	2	2	2	2	2	2	2	2	2	2
2	3	2003-12-25	15	3	2	2	1	2	1	2	2	1	2	2	2	2	1	2	#NULL!	5	2	2	2	2	2	2	2	2	2	2	2	2	2	1	#NULL!	1	2	#NULL!	5	2	2	2	2	2	2	2	2	2	2
2	5	2003-04-10	16	3	2	2	1	5	1	1	2	1	2	2	2	2	1	1	45	5	2	2	2	2	2	2	2	2	2	2	2	2	2	1	#NULL!	1	1	43	5	2	2	2	2	2	2	2	2	2	2
2	1	2004-02-12	15	3	2	2	0	3	1	1	1	2	2	2	2	2	1	1	45	3	2	2	2	2	2	2	2	2	2	2	2	2	2	1	#NULL!	1	1	43	2	2	2	2	2	2	2	2	2	2	2
2	3	2003-10-02	16	3	2	2	0	2	2	2	1	2	2	1	2	2	2	#NULL!	#NULL!	#NULL!	#NULL!	#NULL!	#NULL!	#NULL!	#NULL!	#NULL!	#NULL!	#NULL!	#NULL!	#NULL!	#NULL!	#NULL!	#NULL!	#NULL!	3	1	1	42	2	2	2	2	2	2	2	2	2	2	2
2	1	2003-01-19	16	3	2	2	1	1	1	2	2	2	2	2	2	2	1	1	48	2	2	2	2	2	2	2	2	2	2	2	2	2	2	1	#NULL!	1	1	48	2	2	2	2	2	2	2	2	2	2	2
1	1	2002-02-08	17	3	2	2	0	5	1	1	1	1	2	2	2	2	1	1	45	2	1	2	2	2	2	2	2	2	2	2	2	2	2	2	#NULL!	1	1	43	2	2	2	1	2	2	2	2	2	2	2
2	1	2002-02-15	17	3	2	2	0	5	1	1	1	1	2	2	2	2	1	1	51	2	2	2	2	2	2	2	2	2	2	1	2	2	2	2	#NULL!	1	1	45	2	2	2	2	2	2	2	2	2	2	1
1	6	2003-03-28	16	3	2	2	0	4	1	1	1	1	2	2	2	2	1	1	46	1	2	2	2	2	2	2	2	2	2	2	2	2	2	1	#NULL!	1	1	45	1	2	2	2	2	2	2	2	2	2	2
1	6	2002-11-07	17	3	2	2	0	3	1	1	2	1	2	2	2	2	1	1	39	2	2	2	2	2	2	2	2	2	2	2	2	2	2	1	#NULL!	1	1	39	1	2	2	2	2	2	2	2	2	2	2
2	1	2003-04-26	16	3	2	2	0	4	1	2	2	1	2	2	2	2	2	#NULL!	#NULL!	#NULL!	#NULL!	#NULL!	#NULL!	#NULL!	#NULL!	#NULL!	#NULL!	#NULL!	#NULL!	#NULL!	#NULL!	#NULL!	#NULL!	#NULL!	12	1	1	44	3	2	2	2	2	2	2	2	2	2	2
1	2	2003-11-03	16	3	2	2	2	3	1	1	2	1	2	2	2	2	1	2	#NULL!	3	2	2	1	2	2	2	2	2	2	2	2	2	2	2	#NULL!	1	1	46	2	2	2	2	2	2	2	2	2	2	2
2	1	2004-08-13	15	3	2	1	2	2	2	2	2	2	1	2	2	2	1	1	42	2	2	2	2	2	2	2	2	2	2	2	2	2	2	1	#NULL!	1	1	40	3	2	2	2	2	2	2	2	2	2	2
2	1	2004-05-13	15	3	2	2	0	5	1	1	1	1	2	2	2	2	1	1	48	3	2	2	2	2	2	2	2	2	2	2	2	2	2	1	#NULL!	1	1	35	3	2	2	2	2	2	2	2	2	2	2
1	1	2003-05-05	16	3	2	1	4	1	1	2	2	2	2	2	2	2	2	#NULL!	#NULL!	#NULL!	#NULL!	#NULL!	#NULL!	#NULL!	#NULL!	#NULL!	#NULL!	#NULL!	#NULL!	#NULL!	#NULL!	#NULL!	#NULL!	#NULL!	2	1	1	46	2	2	2	2	2	2	2	2	2	2	2
2	6	2004-08-21	15	3	2	2	0	4	1	1	1	1	2	2	2	2	1	1	36	4	2	2	2	2	2	2	2	2	2	2	2	2	2	1	#NULL!	1	1	31	4	2	2	2	2	2	2	2	2	2	2
2	1	2005-02-07	14	3	2	2	0	2	2	2	1	2	2	2	2	2	1	1	46	2	2	2	2	2	2	2	2	2	2	2	2	2	2	1	#NULL!	1	1	36	3	2	2	2	2	2	2	2	2	2	2
2	1	2002-03-23	17	3	2	2	2	3	1	1	2	1	2	2	2	2	1	1	42	5	2	2	2	2	2	2	2	2	2	2	2	2	1	2	#NULL!	1	1	34	2	2	2	2	2	2	2	2	2	2	2
2	6	2003-01-06	16	3	2	2	0	5	1	1	1	1	2	2	2	2	1	1	48	2	2	2	2	2	2	2	2	2	2	2	2	2	2	1	#NULL!	1	2	#NULL!	2	2	2	2	2	2	2	2	2	2	2
2	1	2002-09-02	17	3	1	2	1	2	1	1	2	2	2	2	2	2	1	1	47	2	2	2	2	2	2	2	2	2	2	2	2	2	2	1	#NULL!	1	1	51	2	2	2	2	2	2	2	2	2	2	2
1	1	2003-10-31	16	3	2	2	0	3	2	2	1	1	2	2	2	2	1	1	40	3	2	2	2	2	2	2	2	2	2	2	2	2	2	1	#NULL!	1	1	39	4	2	2	2	2	2	2	2	2	2	2
2	6	2003-12-24	15	3	2	2	0	4	1	1	1	1	2	2	2	2	1	1	55	2	2	2	2	2	2	2	2	2	2	2	2	2	1	2	#NULL!	1	1	49	1	2	2	2	2	2	2	2	2	2	2
2	3	2003-08-02	16	3	2	2	0	4	1	1	1	1	2	2	2	2	1	2	#NULL!	2	2	2	2	2	2	2	2	2	2	2	2	2	1	2	#NULL!	1	1	37	2	2	2	2	2	2	2	2	2	2	2
2	1	2003-01-04	16	3	2	2	0	3	1	1	2	1	2	2	2	2	1	1	49	3	2	2	2	2	2	2	2	2	2	1	2	2	2	2	#NULL!	1	1	46	2	2	2	2	2	2	2	2	2	2	1
2	1	2003-01-06	16	3	2	2	0	3	1	1	2	1	2	2	2	2	1	1	41	2	2	2	2	2	2	2	2	2	2	2	2	2	2	1	#NULL!	1	1	40	2	2	2	2	2	2	2	2	2	2	2
1	1	2004-03-05	15	3	2	2	1	4	1	1	2	1	1	2	2	2	1	1	44	2	2	2	2	2	2	2	2	2	2	2	2	2	2	1	#NULL!	1	1	45	2	2	2	2	2	2	2	2	2	2	2
2	5	2003-09-03	16	3	2	2	0	3	1	1	2	1	2	2	2	2	1	1	42	2	2	2	2	2	2	2	2	2	2	2	2	2	1	2	#NULL!	1	1	41	2	2	2	2	2	2	2	2	2	2	2
2	1	2004-04-23	15	3	2	1	0	2	1	1	2	2	2	2	2	2	1	1	56	2	2	2	2	2	2	2	2	2	2	2	2	2	2	1	#NULL!	1	1	42	1	2	2	2	2	2	2	2	2	2	2
2	1	2002-12-20	16	3	2	2	0	4	1	1	2	1	2	2	2	2	1	2	#NULL!	2	1	2	2	2	2	2	2	2	2	2	2	2	2	2	#NULL!	1	2	#NULL!	2	2	2	1	2	2	2	2	2	2	2
1	6	2004-04-11	15	3	2	2	0	3	1	1	2	1	2	2	2	2	1	2	#NULL!	2	2	2	2	2	2	2	2	2	2	2	2	2	2	1	#NULL!	1	2	#NULL!	2	2	2	2	2	2	2	2	2	2	2
2	5	2004-02-09	15	3	2	1	0	2	1	1	2	2	2	2	2	2	1	1	41	4	2	2	2	2	2	2	2	2	2	2	2	2	2	1	#NULL!	1	1	36	0	2	2	2	2	2	2	2	2	2	2
2	1	2003-10-16	16	3	2	1	0	2	1	1	2	2	2	2	2	2	1	1	48	3	2	2	2	2	2	2	2	2	2	2	2	2	2	1	#NULL!	1	1	49	0	2	2	2	2	2	2	2	2	2	2
2	1	2003-05-04	16	3	2	2	1	2	1	2	2	1	2	2	2	2	1	1	42	3	2	2	2	2	2	2	2	2	2	1	2	2	2	2	#NULL!	1	1	40	1	2	2	2	2	2	2	2	2	2	2
2	1	2004-02-16	15	3	2	1	2	1	2	1	2	2	2	2	2	2	1	1	42	4	2	2	1	2	2	2	2	2	2	2	2	2	2	2	#NULL!	1	1	43	4	2	2	2	2	2	2	2	2	2	2
2	1	2002-03-03	17	3	2	2	0	6	1	1	2	1	2	2	2	2	1	1	50	2	2	2	2	2	1	2	2	2	2	2	2	2	1	2	#NULL!	1	1	50	2	2	2	2	2	2	2	2	2	2	2
2	1	2003-05-14	16	3	2	2	0	1	2	2	2	1	2	2	2	2	1	1	43	2	2	2	2	2	2	2	2	2	2	2	2	2	2	1	#NULL!	1	1	44	3	2	2	2	2	2	2	2	2	2	2
2	6	2003-11-30	16	3	2	2	1	6	1	1	1	1	2	2	2	2	1	1	38	1	2	2	2	2	2	2	2	2	2	2	2	2	2	1	#NULL!	1	1	36	3	2	2	2	2	2	2	2	2	2	2
1	3	2004-10-25	15	3	2	2	0	3	1	2	1	1	2	2	2	2	1	1	36	2	2	2	2	2	2	2	2	2	2	2	2	2	2	1	#NULL!	1	1	32	3	2	2	2	2	2	2	2	2	2	2
1	1	2004-06-02	15	3	2	2	4	3	1	1	2	1	2	2	2	2	1	1	43	2	2	2	2	2	2	2	2	2	2	2	2	2	2	1	#NULL!	1	1	41	2	2	2	2	2	2	2	2	2	2	2
2	1	2003-04-23	16	3	2	2	0	5	1	1	2	1	2	2	2	2	1	1	45	3	2	2	2	2	2	2	2	2	2	2	2	2	2	1	#NULL!	1	1	36	2	2	2	2	2	2	2	2	2	2	2
2	1	2004-02-24	15	3	2	2	0	3	1	2	2	1	2	2	2	2	1	1	46	3	2	2	2	2	2	2	2	2	2	2	2	2	2	1	#NULL!	1	1	45	2	2	2	2	2	2	2	2	2	2	2
2	5	2002-04-27	17	3	2	2	0	5	1	1	1	1	1	2	2	2	1	1	44	3	2	2	2	2	2	2	2	2	2	2	2	2	2	1	#NULL!	1	1	38	2	2	2	2	2	2	2	2	2	2	2
2	5	2003-02-01	16	3	2	1	0	2	1	2	1	2	2	2	2	2	1	2	#NULL!	4	2	2	2	2	2	2	2	2	2	1	2	2	2	2	#NULL!	1	2	#NULL!	2	2	2	2	2	2	2	2	2	2	2
2	1	2004-12-25	14	3	2	1	1	4	1	1	1	2	2	2	2	2	1	1	43	3	2	2	2	2	2	2	2	2	2	2	2	2	1	2	#NULL!	1	1	43	3	2	2	2	2	2	2	2	2	2	2
1	1	2003-11-01	16	3	2	2	2	4	1	1	1	1	2	2	2	2	1	1	43	3	2	2	2	2	2	2	2	2	2	2	2	2	2	1	#NULL!	1	1	43	3	2	2	2	2	2	2	2	2	2	2
1	3	2004-02-14	15	3	2	1	1	2	1	1	2	2	2	2	2	2	1	1	40	5	2	2	2	2	2	2	2	2	2	1	2	2	2	2	#NULL!	1	1	41	5	2	2	2	2	2	2	2	2	2	2
2	1	2003-05-26	16	3	2	1	1	2	2	2	2	2	2	2	1	2	2	#NULL!	#NULL!	#NULL!	#NULL!	#NULL!	#NULL!	#NULL!	#NULL!	#NULL!	#NULL!	#NULL!	#NULL!	#NULL!	#NULL!	#NULL!	#NULL!	#NULL!	0	2	#NULL!	#NULL!	#NULL!	#NULL!	#NULL!	#NULL!	#NULL!	#NULL!	#NULL!	#NULL!	#NULL!	#NULL!	#NULL!
2	3	2003-06-25	16	3	2	1	0	2	1	1	2	2	2	2	2	2	1	1	42	5	2	2	2	2	2	2	2	2	2	2	2	2	2	1	#NULL!	1	1	39	5	2	2	2	2	2	2	2	2	2	2
1	1	2004-02-26	15	3	2	2	0	2	1	2	2	1	2	2	2	2	1	1	42	3	2	2	2	2	2	2	2	2	2	2	2	2	2	1	#NULL!	1	1	42	3	2	2	2	2	2	2	2	2	2	1
1	1	2002-10-10	17	3	2	2	1	2	1	1	2	2	2	2	2	2	1	1	45	4	2	2	2	2	2	2	2	2	2	2	2	2	2	1	#NULL!	1	1	42	3	2	2	2	2	2	2	2	2	2	1
2	3	2002-12-02	17	3	2	2	0	1	1	2	2	2	2	2	2	2	1	1	46	2	2	2	2	2	2	2	2	2	2	2	2	2	2	1	#NULL!	1	1	46	2	2	2	2	2	2	2	2	2	2	2
1	1	2002-08-07	17	3	2	2	1	3	1	1	2	1	2	2	2	2	1	2	#NULL!	4	2	2	2	2	2	2	2	2	2	2	2	2	2	1	#NULL!	1	2	#NULL!	1	2	2	2	2	2	2	2	2	2	2
1	1	2004-05-11	15	3	2	2	0	2	1	1	2	2	2	2	2	2	1	1	43	4	2	2	2	2	2	2	2	2	2	2	2	2	2	1	#NULL!	1	1	39	4	2	2	2	2	2	2	2	2	2	2
1	1	2004-09-06	15	3	2	2	0	3	1	1	2	1	2	2	2	2	1	1	43	3	2	2	2	2	2	2	2	2	2	2	2	2	2	1	#NULL!	1	1	44	1	2	2	2	2	2	2	2	2	2	2
1	6	2002-04-05	17	3	1	1	1	2	1	1	2	2	2	2	2	2	1	1	44	5	2	2	2	2	2	2	2	2	2	2	2	2	2	1	#NULL!	1	1	43	5	2	2	2	2	2	2	2	2	2	2
1	5	2002-05-28	17	3	2	2	0	3	1	1	2	1	2	2	2	2	1	1	40	2	2	2	2	2	2	2	2	2	2	2	2	2	2	1	#NULL!	1	1	36	3	2	2	2	2	2	2	1	2	2	2
1	1	2003-09-19	16	3	2	1	0	3	1	1	1	2	2	2	2	2	1	2	#NULL!	2	2	2	1	2	2	2	2	2	2	2	2	2	2	2	#NULL!	1	2	#NULL!	3	2	2	2	2	2	2	2	2	2	2
1	1	2004-01-14	15	3	2	2	1	2	1	1	2	2	2	2	2	2	1	1	59	3	2	2	1	2	2	2	2	2	2	2	2	2	2	2	#NULL!	1	1	56	1	2	2	2	2	2	2	2	2	2	2
2	1	2003-03-21	16	3	2	2	0	4	1	1	2	1	2	2	2	2	1	1	43	2	2	2	2	2	2	2	2	2	2	2	2	2	2	1	#NULL!	1	1	38	2	2	2	1	2	2	2	2	2	2	2
1	6	2003-08-31	16	3	1	1	0	2	1	1	2	2	2	2	2	2	1	1	48	4	2	2	2	2	2	2	2	2	2	2	2	2	2	1	#NULL!	1	1	41	3	2	2	2	2	2	2	2	2	2	2
2	1	2004-04-05	15	3	2	2	0	4	1	1	1	1	2	2	2	2	1	1	41	3	2	2	2	2	2	2	2	2	2	2	2	2	2	1	#NULL!	1	1	39	2	2	2	2	2	2	1	2	2	2	2
1	6	2004-02-21	15	3	2	2	0	3	1	1	2	1	2	2	2	2	1	1	49	2	2	2	2	2	2	2	2	2	2	2	2	2	2	1	#NULL!	1	1	45	2	2	2	2	2	2	2	2	2	2	2
2	1	2003-09-19	16	3	2	2	0	3	1	1	2	1	2	2	2	2	1	1	44	2	2	2	2	2	1	2	2	2	2	2	2	2	2	2	#NULL!	1	1	39	3	2	2	2	2	2	2	2	2	2	2
1	1	2003-01-06	16	3	2	2	0	1	2	1	2	2	2	2	2	2	1	1	42	1	2	2	2	2	2	2	2	2	2	2	2	2	2	1	#NULL!	1	1	42	2	2	2	2	2	2	2	2	2	2	2
1	1	2003-02-26	16	3	2	2	0	3	1	1	2	1	2	2	2	2	1	1	46	3	2	2	2	2	2	2	2	2	2	2	2	2	2	1	#NULL!	1	1	40	3	2	2	2	2	2	2	2	2	2	2
1	1	2003-02-07	16	3	2	2	0	3	1	1	2	1	2	2	2	2	1	1	48	0	2	2	2	2	2	2	2	2	2	2	2	2	2	1	#NULL!	1	1	48	0	2	2	2	2	2	2	2	2	2	1
1	1	2003-06-02	16	3	2	2	0	5	1	1	1	1	2	2	2	2	1	1	42	2	2	2	2	2	2	2	2	2	2	2	2	2	1	2	#NULL!	1	1	39	3	2	2	2	2	2	2	2	2	2	2
2	1	2003-06-02	16	3	2	2	0	3	1	1	2	1	2	2	2	2	1	1	41	2	2	2	2	2	2	2	2	2	2	2	2	2	2	1	#NULL!	1	1	42	4	2	2	2	2	2	2	2	2	2	2
1	1	2002-12-15	16	3	2	2	0	3	1	1	2	1	2	2	2	2	1	1	44	3	2	2	2	2	2	2	2	2	2	2	2	2	2	1	#NULL!	1	1	47	3	2	2	1	2	2	2	2	2	2	2
2	6	2003-09-13	16	3	2	2	0	3	2	1	2	1	2	1	2	2	1	1	43	3	2	2	2	2	2	2	2	2	2	2	2	2	2	1	#NULL!	2	#NULL!	#NULL!	#NULL!	#NULL!	#NULL!	#NULL!	#NULL!	#NULL!	#NULL!	#NULL!	#NULL!	#NULL!	#NULL!
2	1	2003-04-28	16	3	2	2	1	3	1	1	2	1	2	2	2	2	1	1	43	0	2	2	2	2	2	2	2	2	2	2	2	2	2	1	#NULL!	1	1	34	0	2	2	2	2	2	2	2	2	2	2
2	1	2003-07-28	16	3	2	2	0	2	1	1	2	2	2	2	2	2	1	1	37	2	2	2	2	2	2	2	2	2	2	2	2	2	2	1	#NULL!	1	1	38	3	2	2	2	2	2	2	2	2	2	2
1	1	2003-06-02	16	3	2	2	0	3	1	1	2	1	2	2	2	2	1	1	43	1	2	2	2	2	2	2	2	2	2	2	2	2	2	1	#NULL!	1	1	42	2	2	2	2	2	2	2	2	2	2	2
2	3	2004-07-19	15	3	2	2	0	4	1	1	1	1	2	2	2	2	1	2	#NULL!	5	2	2	1	2	2	2	2	2	2	2	2	2	2	2	#NULL!	1	2	#NULL!	4	2	2	2	2	2	2	2	2	2	2
2	1	2003-08-02	16	3	2	2	0	4	1	1	1	1	2	2	2	2	1	1	32	2	2	2	2	2	2	2	2	2	2	2	2	2	2	1	#NULL!	1	1	34	3	2	2	2	2	2	2	2	2	2	2
2	1	2003-07-16	16	3	2	2	0	1	1	2	2	2	2	2	2	2	2	#NULL!	#NULL!	#NULL!	#NULL!	#NULL!	#NULL!	#NULL!	#NULL!	#NULL!	#NULL!	#NULL!	#NULL!	#NULL!	#NULL!	#NULL!	#NULL!	#NULL!	16	1	1	42	2	2	2	2	2	2	2	2	2	2	2
2	1	2004-02-14	15	3	2	2	0	4	1	1	1	1	2	2	2	2	1	1	39	3	2	2	2	2	2	2	2	2	2	2	2	2	2	1	#NULL!	1	1	39	0	2	2	2	2	2	2	2	2	2	2
2	1	2002-09-28	17	3	2	1	0	3	1	1	1	2	2	2	2	2	1	1	44	2	1	1	2	2	2	2	2	2	2	2	2	2	2	2	#NULL!	1	1	43	1	2	2	2	2	2	2	2	2	2	2
2	1	2003-08-20	16	3	2	2	1	5	1	1	1	1	2	2	2	2	1	1	46	3	2	2	2	2	2	2	2	2	2	2	2	2	2	1	#NULL!	1	1	38	2	2	2	2	2	2	2	2	2	2	2
2	1	2002-08-19	17	3	2	2	0	3	1	1	2	1	2	2	2	2	1	1	43	2	2	2	2	2	2	2	2	2	2	2	2	2	2	1	#NULL!	1	1	41	1	2	2	2	2	2	2	2	2	2	2
2	1	2004-09-15	15	3	2	2	1	4	1	1	1	1	2	2	2	2	1	1	41	3	2	2	2	2	2	2	2	2	2	2	2	2	2	1	#NULL!	1	1	37	3	2	2	2	2	2	2	2	2	2	2
2	1	2003-08-17	16	3	2	2	0	3	1	1	2	1	2	2	2	2	1	1	45	2	2	2	2	2	2	2	2	1	2	2	2	2	2	2	#NULL!	1	1	44	3	2	2	2	2	2	2	2	2	2	2
2	1	2004-11-08	15	3	2	2	0	2	2	1	2	1	2	2	2	2	1	2	#NULL!	4	2	2	2	2	2	2	2	2	2	2	2	2	2	1	#NULL!	1	2	#NULL!	3	2	2	2	2	2	2	2	2	2	2
2	1	2004-06-06	15	3	2	2	0	5	1	1	1	1	2	2	2	2	1	1	50	2	2	2	2	2	2	2	2	2	2	2	2	2	1	2	#NULL!	1	1	52	1	2	2	2	2	2	2	2	2	2	2
2	1	2004-05-01	15	3	1	2	1	3	1	1	2	1	2	2	2	2	1	1	39	2	2	2	2	2	2	2	2	2	2	2	2	2	2	1	#NULL!	1	1	37	2	2	2	2	2	2	2	2	2	2	2
2	1	2002-09-22	17	3	1	2	1	3	1	1	2	1	2	2	2	2	1	1	49	2	2	2	2	2	2	2	2	2	2	1	2	2	2	2	#NULL!	1	1	42	2	2	2	2	2	2	2	2	2	2	2
2	6	2003-12-03	16	3	2	1	0	2	1	1	2	2	2	2	2	2	1	1	40	4	2	2	2	2	2	2	2	2	2	2	2	2	2	1	#NULL!	1	1	41	4	2	2	2	2	2	2	2	2	2	2
1	5	2003-07-10	16	3	2	2	0	5	1	1	1	1	2	2	2	2	1	1	40	3	2	2	2	2	2	2	2	2	2	2	2	2	2	1	#NULL!	1	1	39	3	2	2	2	2	2	2	2	2	2	2
2	2	2004-06-01	15	3	2	1	2	1	1	2	2	2	2	2	2	2	1	2	#NULL!	5	2	2	2	2	2	2	2	2	2	2	2	2	1	2	#NULL!	1	1	40	5	2	2	2	2	2	2	2	1	2	2
2	5	2004-07-09	15	3	2	2	2	3	1	1	2	1	2	2	2	2	1	2	#NULL!	3	2	2	1	2	2	2	2	2	2	2	2	2	2	2	#NULL!	1	1	43	4	2	2	2	2	2	2	2	1	2	2
2	1	2004-04-08	15	3	2	2	0	3	1	1	2	1	2	2	2	2	1	1	37	3	2	2	2	2	2	2	2	2	2	2	2	2	2	1	#NULL!	1	1	38	2	2	2	2	2	2	2	2	2	2	2
2	1	2002-12-18	16	3	2	2	0	5	1	1	1	2	2	2	2	2	1	1	44	2	2	2	2	2	2	2	2	2	2	2	2	2	2	1	#NULL!	1	1	44	2	2	2	2	2	2	2	2	2	2	2
2	1	2004-06-02	15	3	2	2	0	5	1	1	1	1	2	2	2	2	1	1	40	3	2	2	2	2	2	2	2	2	2	2	2	2	2	1	#NULL!	1	1	38	3	2	2	2	2	2	2	2	2	2	2
2	3	2004-10-06	15	3	2	2	0	2	2	1	2	1	2	2	2	2	1	1	61	3	2	2	2	2	2	2	2	2	2	2	2	2	2	1	#NULL!	1	1	36	2	2	2	2	2	2	2	2	2	2	2
2	1	2004-06-19	15	3	2	1	0	4	1	1	2	2	2	1	2	1	1	1	41	4	2	2	2	2	1	2	2	2	2	2	2	2	2	2	#NULL!	1	1	40	3	2	2	2	2	1	2	2	2	2	2
1	1	2003-03-08	16	3	2	2	0	3	1	1	2	1	2	2	2	2	1	1	41	3	2	2	2	2	2	2	2	2	2	2	2	2	2	1	#NULL!	1	1	42	3	2	2	2	2	2	2	2	2	2	2
1	1	2003-08-29	16	3	1	2	2	3	1	1	2	1	2	2	2	2	1	1	46	4	2	2	2	2	2	2	2	2	2	2	2	2	2	1	#NULL!	1	1	42	5	2	2	2	2	2	2	2	2	2	2
1	6	2003-10-09	16	3	1	2	0	4	2	1	1	1	2	2	1	2	1	1	43	3	2	2	2	2	2	2	2	2	2	2	2	2	2	1	#NULL!	1	1	44	3	2	2	2	2	2	2	2	2	2	2
2	1	2004-02-22	15	3	2	1	0	4	1	1	2	2	1	1	2	2	1	1	48	4	2	2	2	2	2	2	2	2	2	2	2	2	2	1	#NULL!	1	1	43	3	2	2	2	2	2	2	2	2	2	2
2	2	2003-06-25	16	3	2	1	0	5	1	1	1	2	2	2	2	2	1	1	42	4	2	2	2	2	2	2	2	2	2	2	2	2	1	2	#NULL!	1	1	39	3	2	2	2	2	2	2	2	2	2	2
2	1	2002-06-25	17	3	2	2	0	3	2	2	1	1	2	2	2	2	1	1	42	2	2	2	2	2	2	2	2	2	2	2	2	2	2	1	#NULL!	1	1	40	3	2	2	2	2	2	2	2	2	2	2
2	1	2003-02-14	16	3	2	2	0	3	1	1	2	1	2	2	2	2	1	1	48	2	2	2	2	2	2	2	2	2	2	2	2	2	2	1	#NULL!	1	1	45	3	2	2	2	2	2	2	2	2	2	2
2	6	2004-07-02	15	3	2	2	0	4	1	1	1	1	2	2	2	2	1	1	40	3	2	2	2	2	2	2	2	2	2	2	2	2	2	1	#NULL!	1	1	37	2	2	2	2	2	2	2	2	2	2	2
2	1	2003-07-16	16	3	2	2	0	5	1	1	1	1	2	2	2	2	1	1	40	2	2	2	2	2	2	2	2	2	2	2	2	2	2	1	#NULL!	1	1	38	2	2	2	2	2	2	2	2	2	2	2
2	1	2003-12-16	15	3	2	2	0	4	1	1	1	1	2	2	2	2	1	1	45	4	2	2	2	2	2	2	2	2	2	2	2	2	2	1	#NULL!	1	1	43	3	2	2	1	2	2	2	2	2	2	2
2	6	2003-02-14	16	3	2	2	0	4	1	1	2	1	2	2	2	2	1	1	48	1	2	2	2	2	2	2	2	2	2	2	2	2	2	1	#NULL!	1	1	49	1	2	2	2	2	2	2	2	2	2	2
2	5	2004-03-29	15	3	2	1	1	2	1	1	2	2	2	2	2	2	1	1	44	2	2	2	2	2	2	2	2	2	2	2	2	2	2	1	#NULL!	1	1	43	4	2	2	2	2	2	2	2	2	2	2
2	6	2004-02-22	15	3	2	2	1	5	1	1	1	1	2	2	2	2	1	1	45	2	2	2	2	2	2	2	2	2	2	2	2	2	2	1	#NULL!	1	1	42	2	2	2	2	2	2	2	2	2	2	2
2	1	2003-03-27	16	3	2	2	0	3	2	1	2	1	2	2	2	2	1	1	43	2	2	2	2	2	2	2	2	2	2	2	2	2	2	1	#NULL!	2	#NULL!	#NULL!	#NULL!	#NULL!	#NULL!	#NULL!	#NULL!	#NULL!	#NULL!	#NULL!	#NULL!	#NULL!	#NULL!
1	1	2003-08-26	16	3	2	2	0	2	1	1	2	2	2	2	2	2	1	1	42	2	2	2	2	2	2	2	2	2	2	2	2	2	2	1	#NULL!	1	1	40	3	2	2	2	2	2	2	2	2	2	2
1	1	2003-06-13	16	3	2	2	0	3	1	1	2	1	2	2	2	2	1	1	40	3	2	2	2	2	2	2	2	2	2	2	2	2	2	1	#NULL!	1	1	38	3	2	2	2	2	2	2	2	2	2	2
1	1	2004-01-08	15	3	1	1	2	4	1	1	1	2	1	2	2	2	1	1	43	3	2	2	2	2	2	2	2	2	2	2	2	2	2	1	#NULL!	1	1	45	2	2	2	2	2	2	2	2	2	2	2
2	1	2003-06-06	16	3	2	2	1	4	1	1	1	1	2	2	2	2	1	1	45	2	2	2	2	2	2	2	2	2	2	2	2	2	2	1	#NULL!	1	1	41	2	2	2	2	2	2	2	2	2	2	2
2	1	2004-06-09	15	3	2	2	1	5	1	1	2	1	2	2	2	2	1	1	48	2	2	2	2	2	2	2	2	2	2	2	2	2	2	1	#NULL!	1	1	44	2	2	2	2	2	2	2	2	2	2	2
1	1	2004-01-28	15	3	2	2	1	8	1	1	1	1	1	2	1	2	1	2	#NULL!	0	2	2	2	2	2	2	2	2	2	2	2	2	2	1	#NULL!	1	2	#NULL!	0	2	2	2	2	2	2	2	2	2	2
2	6	2004-06-10	15	3	2	2	0	5	1	1	1	1	2	2	2	2	1	1	44	2	2	2	1	2	2	2	2	2	2	2	2	2	2	2	#NULL!	1	1	39	4	2	2	2	2	2	2	2	2	2	2
2	1	2004-12-09	15	3	2	2	0	3	1	1	2	1	2	2	2	2	1	1	51	2	2	2	2	2	2	2	2	2	2	2	2	2	2	1	#NULL!	1	1	43	3	2	2	2	2	2	2	2	2	2	2
2	1	2003-04-01	16	3	2	2	0	4	1	1	2	1	2	2	2	2	1	1	42	2	2	2	2	2	2	2	2	2	2	2	2	2	2	1	#NULL!	1	1	40	2	2	2	2	2	2	2	2	2	2	2
2	1	2004-09-19	15	3	2	2	0	4	1	1	1	1	2	2	2	2	1	1	33	2	2	2	2	2	2	2	2	2	2	2	2	2	2	1	#NULL!	1	1	33	3	2	2	2	2	2	2	2	2	2	2
1	1	2004-06-06	15	3	2	2	0	2	1	1	2	2	2	2	2	2	1	2	#NULL!	2	2	2	2	2	2	2	2	2	2	1	2	2	2	2	#NULL!	1	2	#NULL!	3	2	2	2	2	2	2	2	2	2	2
1	6	2003-07-26	16	3	1	1	0	3	2	1	1	2	2	2	2	2	1	1	42	4	2	2	2	2	2	2	2	2	2	2	2	2	2	1	#NULL!	1	1	42	4	2	2	2	2	2	2	2	2	2	2
1	1	2003-04-27	16	3	2	2	0	4	1	1	2	1	2	2	2	2	1	1	47	3	2	2	2	2	2	2	2	2	2	2	2	2	2	1	#NULL!	1	1	39	2	2	2	2	2	2	2	2	2	2	2
2	1	2004-04-26	15	3	2	2	0	5	1	1	1	1	2	2	2	2	1	1	40	2	2	2	1	1	2	2	2	2	2	2	2	2	2	2	#NULL!	1	1	35	1	2	2	1	2	2	2	2	2	2	2
2	1	2003-06-02	16	3	2	2	0	5	1	1	1	1	2	2	2	2	1	1	38	2	2	2	2	2	2	2	2	2	2	2	2	2	2	1	#NULL!	1	1	36	3	2	2	2	2	2	2	2	2	2	2
2	1	2003-04-07	16	3	2	2	0	4	1	1	2	1	2	2	2	2	1	1	38	3	2	2	2	2	2	2	2	2	2	2	2	2	2	1	#NULL!	1	1	37	3	2	2	2	2	2	2	2	2	2	2
2	1	2003-04-11	16	3	2	2	0	4	1	1	2	1	2	2	2	2	1	1	43	2	2	2	2	2	2	2	2	2	2	2	2	2	2	1	#NULL!	1	1	42	3	2	2	2	2	2	2	2	2	2	2
2	1	2003-03-03	16	3	2	2	0	7	1	1	1	1	2	2	2	2	1	1	38	2	2	2	2	2	2	2	2	2	2	2	2	2	2	1	#NULL!	1	1	36	2	2	2	2	2	2	2	2	2	2	2
1	1	2003-10-25	16	3	2	1	0	3	1	1	1	2	2	2	2	2	1	2	#NULL!	4	2	2	2	2	2	2	2	2	2	2	2	2	1	2	#NULL!	1	2	#NULL!	0	2	2	2	2	2	2	2	2	2	2
1	4	2003-06-26	16	3	2	2	2	3	1	1	2	1	2	2	2	2	1	1	42	2	2	2	2	2	2	2	2	2	2	2	2	2	2	1	#NULL!	1	1	40	3	2	2	2	2	2	2	2	2	2	2
1	3	2004-05-06	15	3	2	2	0	3	1	1	2	1	2	2	2	2	1	1	52	3	2	2	2	2	2	2	2	2	2	2	2	2	2	1	#NULL!	1	1	49	2	1	2	2	2	2	2	2	2	2	2
2	1	2004-10-17	15	3	2	2	2	3	1	1	2	1	2	2	2	2	1	1	42	3	2	2	2	2	2	2	2	2	2	2	2	2	1	2	#NULL!	1	1	38	1	2	2	2	2	2	2	2	2	2	1
2	1	2002-01-06	17	3	2	2	0	4	2	1	1	1	2	2	2	2	1	1	48	2	2	2	2	2	2	2	2	2	2	1	2	2	2	2	#NULL!	1	2	#NULL!	2	2	2	2	2	2	2	2	2	2	2
1	1	2002-09-26	17	3	2	2	0	2	1	1	2	2	2	2	2	2	1	1	45	2	2	2	2	2	2	2	2	1	2	2	2	2	1	2	#NULL!	1	1	38	2	2	2	2	2	2	2	2	2	2	2
1	1	2003-12-30	15	3	2	2	0	3	1	1	2	1	2	2	2	2	1	2	#NULL!	3	2	2	2	2	2	2	2	2	2	2	2	2	2	1	#NULL!	1	2	#NULL!	3	2	2	2	2	2	2	2	2	2	2
2	1	2002-05-17	17	3	2	2	0	2	2	2	2	1	2	2	2	2	1	1	48	1	2	2	2	2	1	2	2	2	2	2	2	2	2	2	#NULL!	1	1	36	1	2	2	2	2	2	2	2	2	2	1
2	1	2004-03-11	15	3	2	2	0	2	1	2	2	1	2	2	2	2	1	1	43	2	2	2	2	2	2	2	2	2	2	2	2	2	2	1	#NULL!	1	1	37	2	2	2	2	2	2	2	2	2	2	2
2	1	2003-11-01	16	3	2	2	0	2	1	1	2	2	2	2	2	2	1	1	64	2	2	2	2	2	2	2	2	2	2	2	2	2	1	2	#NULL!	1	1	57	2	2	2	1	2	2	2	2	2	2	2
1	6	2002-08-16	17	3	2	2	0	3	1	1	2	1	2	2	2	2	1	1	44	3	2	2	2	2	2	2	2	2	2	2	2	2	2	1	#NULL!	1	1	40	2	2	2	2	2	2	2	2	2	2	2
2	1	2003-05-26	16	3	2	2	0	2	1	2	2	1	2	2	2	2	2	#NULL!	#NULL!	#NULL!	#NULL!	#NULL!	#NULL!	#NULL!	#NULL!	#NULL!	#NULL!	#NULL!	#NULL!	#NULL!	#NULL!	#NULL!	#NULL!	#NULL!	13	1	1	46	3	2	2	1	2	2	2	2	2	2	2
1	6	2003-12-12	16	3	2	1	1	2	1	2	1	2	2	2	2	2	1	2	#NULL!	2	2	2	2	2	2	2	2	2	2	2	2	2	2	1	#NULL!	1	2	#NULL!	3	2	2	2	2	2	2	2	2	2	2
1	1	2003-09-09	16	3	2	2	1	2	1	1	2	2	2	2	2	2	1	1	44	0	2	2	2	2	2	2	2	2	2	2	2	2	2	1	#NULL!	1	1	40	3	2	2	2	2	2	2	2	2	2	2
1	1	2003-09-14	16	3	2	2	0	1	2	1	2	2	2	2	2	2	1	1	47	3	1	2	2	2	2	2	2	2	2	2	2	2	2	2	#NULL!	1	1	46	2	2	2	2	2	2	2	2	2	2	2
2	3	2004-02-10	15	3	2	2	0	3	1	1	2	1	2	2	2	2	1	1	48	3	2	2	2	2	2	2	2	2	2	2	2	2	2	1	#NULL!	1	1	46	2	2	2	2	2	2	2	2	2	2	2
2	1	2004-02-11	15	3	2	2	0	2	1	1	2	2	2	2	2	2	1	1	50	3	2	2	1	2	2	2	2	2	2	2	2	2	2	2	#NULL!	1	1	45	2	2	2	1	2	2	2	2	2	2	2
1	6	2003-05-28	16	3	2	2	0	4	1	1	1	1	2	2	2	2	1	1	49	2	2	2	2	2	2	2	2	2	2	2	2	2	2	1	#NULL!	1	1	42	2	2	2	2	2	2	2	2	2	2	2
2	6	2003-10-01	16	3	2	2	0	3	1	1	2	1	2	2	2	2	1	1	42	3	2	2	2	2	2	2	2	2	2	2	2	2	2	1	#NULL!	1	1	39	2	2	2	2	2	2	2	2	2	2	1
2	6	2003-11-09	16	3	2	1	0	2	1	1	2	2	2	2	2	2	1	1	41	0	2	2	2	2	2	2	2	2	2	2	2	2	2	1	#NULL!	1	2	#NULL!	1	2	2	2	2	2	2	2	2	2	2
2	1	2003-09-11	16	3	2	2	0	4	1	1	2	1	2	2	2	2	1	1	45	3	2	2	2	2	2	2	2	2	2	2	2	2	2	1	#NULL!	1	1	45	2	2	2	2	2	2	2	2	2	2	2
2	1	2004-03-24	15	3	2	2	0	3	1	1	2	1	2	2	2	2	1	1	46	3	2	2	2	2	2	2	2	2	2	2	2	2	2	1	#NULL!	1	1	36	3	2	2	2	2	2	2	2	2	2	2
1	1	2002-11-07	17	3	2	2	0	2	1	1	2	2	2	2	2	2	1	2	#NULL!	3	2	2	2	2	2	2	2	2	2	2	2	2	2	1	#NULL!	1	2	#NULL!	2	2	2	2	2	2	2	2	2	2	2
1	6	2003-02-08	16	3	2	2	0	4	1	1	2	1	2	2	2	1	1	1	45	3	2	2	1	2	2	2	2	2	2	2	2	2	2	2	#NULL!	1	1	43	2	2	2	1	2	2	2	2	2	2	2
1	6	2003-08-15	16	3	2	2	0	4	1	1	1	1	2	2	2	2	1	1	42	2	1	2	2	2	2	2	2	2	2	2	2	2	2	2	#NULL!	1	1	45	3	2	2	2	2	2	2	2	2	2	2
1	1	2003-04-24	16	3	2	2	2	3	1	1	2	1	2	2	2	2	1	1	46	3	2	2	2	2	2	2	2	2	2	2	2	2	2	1	#NULL!	1	1	46	3	2	2	2	2	2	2	2	2	2	2
1	1	2003-05-23	16	3	2	2	1	4	1	1	1	1	2	2	2	2	1	1	40	3	2	2	2	2	2	2	2	2	2	2	2	2	2	1	#NULL!	1	1	39	0	2	2	2	2	2	2	2	2	2	2
2	1	2004-01-01	15	3	2	2	0	3	1	1	2	1	2	2	2	2	1	1	48	3	2	2	2	2	2	2	2	2	2	2	2	2	2	1	#NULL!	1	1	46	3	2	2	2	2	2	2	2	2	2	2
1	1	2004-06-18	15	3	2	2	0	3	1	1	2	1	2	2	2	2	1	1	44	2	2	2	2	2	2	2	2	2	2	2	2	2	2	1	#NULL!	1	1	38	3	2	2	2	2	2	2	2	2	2	2
2	3	2004-01-08	15	3	2	2	0	7	1	1	1	1	1	2	2	2	1	1	36	2	2	2	2	2	2	2	2	2	2	2	2	2	2	1	#NULL!	1	1	32	2	2	2	2	2	2	2	2	2	2	2
2	1	2003-07-14	16	3	1	2	0	3	1	1	2	1	2	2	2	2	1	1	43	1	2	2	2	2	2	2	2	2	2	2	2	2	1	2	#NULL!	1	1	42	2	2	2	2	2	2	2	2	2	2	2
2	6	2004-01-02	15	3	2	2	0	4	1	1	2	1	2	2	2	2	1	1	46	3	2	2	2	2	2	2	2	2	2	2	2	2	2	1	#NULL!	1	1	46	3	2	2	2	2	2	2	2	2	2	2
2	1	2004-11-06	15	3	2	2	0	4	1	1	2	2	1	2	2	2	1	1	56	4	2	2	2	1	2	2	2	2	2	2	2	2	2	2	#NULL!	1	1	40	4	2	2	2	2	2	2	2	2	2	2
2	1	2005-04-03	14	3	2	2	1	5	1	1	1	1	2	2	2	2	1	1	38	4	2	2	2	2	2	2	2	2	2	2	2	2	2	1	#NULL!	1	1	38	4	2	2	2	2	2	2	2	2	2	2
1	6	2004-03-01	15	3	2	2	0	3	1	1	2	1	2	2	2	2	1	2	#NULL!	4	2	2	2	2	2	2	2	2	2	2	2	2	2	1	#NULL!	1	2	#NULL!	2	2	2	2	2	2	2	2	2	2	2
1	1	2002-10-07	17	3	2	2	0	5	1	1	1	1	2	2	2	2	1	1	41	3	2	2	2	2	2	2	2	2	2	2	2	2	2	1	#NULL!	1	1	39	2	2	2	2	2	2	2	2	2	2	2
2	2	2003-11-02	16	3	2	2	0	3	1	1	2	1	2	2	2	2	1	1	40	3	2	2	1	1	2	2	2	2	2	2	2	2	2	2	#NULL!	1	1	41	1	2	2	2	2	2	2	2	2	2	2
1	1	2003-06-27	16	3	2	2	0	3	1	1	2	1	2	2	2	2	1	1	46	3	2	2	2	2	2	2	2	2	2	2	2	2	1	2	#NULL!	1	1	44	3	2	2	1	2	2	2	2	2	2	2
1	1	2003-12-18	15	3	2	2	0	4	1	1	2	1	2	2	1	2	1	2	#NULL!	3	2	2	2	2	2	2	2	2	2	2	2	2	2	1	#NULL!	1	2	#NULL!	2	2	2	2	2	2	2	2	2	2	2
2	3	2003-08-11	16	3	2	2	0	4	2	2	1	2	1	2	2	2	1	1	35	2	2	2	2	2	2	2	2	2	2	2	2	2	2	1	#NULL!	1	1	34	2	2	2	2	2	2	2	2	2	2	2
2	1	2004-03-01	15	3	2	1	0	3	1	1	1	2	2	2	2	2	1	1	52	5	2	2	2	2	2	2	2	2	2	2	2	2	1	2	#NULL!	1	1	46	3	2	2	2	2	2	2	2	2	2	2
2	1	2004-05-12	15	3	2	2	0	3	1	1	2	1	2	2	2	2	1	2	#NULL!	3	2	2	2	2	2	2	2	2	2	2	2	1	2	2	#NULL!	1	2	#NULL!	2	2	2	2	2	2	2	2	2	2	2
2	1	2004-08-20	15	3	2	2	0	3	1	1	2	1	2	2	2	2	1	1	57	2	2	1	2	2	2	2	2	2	2	2	2	2	2	2	#NULL!	1	1	55	1	2	2	2	2	2	2	2	2	2	2
2	1	2004-02-03	15	3	2	2	0	2	1	1	2	2	2	2	2	2	1	1	48	2	2	2	2	2	2	2	2	2	2	2	2	2	2	1	#NULL!	1	1	48	4	2	2	1	2	2	2	2	2	2	2
2	1	2004-01-20	15	3	2	2	0	5	1	1	1	1	2	2	2	2	1	1	40	4	2	2	2	2	2	2	2	2	2	2	2	2	2	1	#NULL!	1	1	38	3	2	2	2	2	2	2	2	2	2	2
1	3	2004-05-22	15	3	2	1	1	1	1	2	2	2	2	2	2	2	2	#NULL!	#NULL!	#NULL!	#NULL!	#NULL!	#NULL!	#NULL!	#NULL!	#NULL!	#NULL!	#NULL!	#NULL!	#NULL!	#NULL!	#NULL!	#NULL!	#NULL!	5	1	1	36	4	2	2	2	2	2	2	2	2	2	2
1	1	2002-11-12	17	3	2	2	0	3	1	1	1	2	2	2	2	2	1	1	46	2	2	2	2	2	2	2	2	2	2	2	2	2	2	1	#NULL!	1	1	46	1	2	2	2	2	2	2	2	2	2	2
2	1	2004-08-01	15	3	2	2	0	4	1	1	1	1	2	2	2	2	1	1	40	3	2	2	2	2	2	2	2	2	2	2	2	2	2	1	#NULL!	1	1	38	2	2	2	2	2	2	2	2	2	2	2
2	1	2003-05-29	16	3	2	1	0	2	1	1	2	2	2	2	2	2	1	1	43	4	2	2	2	2	2	2	2	2	1	2	2	2	2	2	#NULL!	1	1	42	5	2	2	2	2	2	2	2	2	2	2
2	1	2002-09-03	17	3	2	2	0	6	1	1	1	2	2	2	2	2	1	1	42	3	2	2	2	2	2	2	2	2	2	2	2	2	2	1	#NULL!	1	1	40	4	2	2	2	2	2	2	2	2	2	2
2	1	2004-03-12	15	3	2	2	1	2	1	1	2	2	2	2	2	2	1	2	#NULL!	2	2	2	2	2	2	2	2	2	2	2	2	2	2	1	#NULL!	1	1	44	3	2	2	2	2	2	2	2	2	2	2
2	1	2004-02-19	15	3	2	2	0	2	1	1	2	2	2	2	2	2	1	1	44	3	2	2	2	2	2	2	2	2	2	2	2	2	2	1	#NULL!	1	1	42	3	2	2	2	2	2	2	2	2	2	2
1	1	2004-09-06	15	3	2	2	0	3	2	2	1	1	2	2	2	2	1	1	42	2	2	2	2	2	2	2	2	2	2	2	2	2	2	1	#NULL!	1	1	41	2	2	2	2	2	2	2	2	2	2	2
2	1	2003-09-20	16	3	2	2	0	5	1	1	1	1	2	2	2	2	1	1	37	2	2	2	2	2	2	2	2	2	2	2	2	2	2	1	#NULL!	1	1	36	2	2	2	2	2	2	2	2	2	2	2
2	1	2004-10-16	15	3	2	2	0	3	1	1	2	1	2	2	2	2	1	1	44	2	2	2	2	2	2	2	2	2	2	1	2	2	2	2	#NULL!	1	1	34	2	2	2	2	2	2	2	2	2	2	2
2	6	2004-01-22	15	3	2	2	0	3	1	1	2	1	2	2	2	2	1	1	47	2	2	2	2	2	2	2	2	2	2	1	2	2	2	2	#NULL!	1	1	38	3	2	2	2	2	2	2	2	2	2	2
2	3	2003-05-10	16	3	2	2	1	2	1	2	2	1	2	2	2	2	1	1	36	2	2	2	2	2	2	2	2	2	2	2	2	2	2	1	#NULL!	1	1	35	3	2	2	2	2	2	2	2	2	2	2
2	1	2004-01-20	15	3	2	2	0	3	1	1	2	1	2	2	2	2	1	1	41	4	2	2	2	2	2	2	2	2	2	1	2	2	2	2	#NULL!	1	1	42	2	2	2	2	2	2	2	2	2	2	1
1	1	2004-09-30	15	3	1	2	1	4	1	1	2	1	2	2	2	2	1	2	#NULL!	5	2	2	1	2	2	2	2	2	2	2	2	2	2	2	#NULL!	1	2	#NULL!	4	2	2	2	2	2	2	2	2	2	2
1	6	2004-03-17	15	3	2	2	1	4	1	1	1	1	2	2	2	2	1	1	43	2	2	2	2	2	2	2	2	2	2	2	2	2	1	2	#NULL!	1	1	33	2	2	2	2	2	2	2	2	2	2	2
1	1	2004-04-10	15	3	2	2	0	3	1	1	2	1	2	2	2	2	1	1	50	3	2	2	2	2	2	2	2	2	2	2	2	2	2	1	#NULL!	1	1	41	2	2	2	2	2	2	2	2	2	2	2
1	1	2004-04-12	15	3	2	2	0	3	1	1	2	1	2	2	2	2	1	1	42	3	2	2	2	2	2	2	2	2	2	2	2	2	2	1	#NULL!	1	1	40	3	2	2	2	2	2	2	2	2	2	2
1	1	2003-06-23	16	3	2	2	0	2	2	2	1	2	2	2	2	2	1	2	#NULL!	3	2	2	2	2	1	2	2	2	2	2	2	2	2	2	#NULL!	1	2	#NULL!	2	2	2	2	2	2	2	2	2	2	2
1	6	2003-05-06	16	3	2	2	0	3	2	2	2	2	1	1	2	2	1	1	40	2	2	2	2	2	2	2	2	2	2	2	2	2	2	1	#NULL!	1	1	40	3	2	2	2	2	2	2	2	2	2	2
1	1	2004-01-06	15	3	2	2	0	3	1	1	2	1	2	2	2	2	1	1	38	2	2	2	2	2	2	2	2	2	2	2	2	2	2	1	#NULL!	1	1	39	3	2	2	2	2	2	2	2	2	2	2
1	1	2004-01-25	15	3	2	1	0	2	2	2	1	2	2	2	2	2	1	1	40	4	2	2	1	1	2	2	2	2	2	2	2	2	2	2	#NULL!	1	1	35	2	2	2	2	2	2	1	2	2	2	2
2	1	2003-11-22	16	3	2	2	0	6	1	1	1	1	2	1	2	2	1	1	46	3	2	2	2	2	2	2	2	2	2	2	2	2	2	1	#NULL!	1	1	30	2	2	2	2	2	2	2	2	2	2	2
1	1	2004-03-17	15	3	2	2	0	3	1	1	2	1	2	2	2	2	1	1	44	2	2	2	2	2	2	2	2	2	2	2	2	2	2	1	#NULL!	1	1	37	2	2	2	2	2	2	2	2	2	2	2
2	1	2003-05-17	16	3	2	2	0	1	2	2	2	2	2	2	1	2	1	1	46	3	2	2	2	2	2	2	2	2	2	2	2	2	2	1	#NULL!	1	1	41	2	2	2	2	2	2	2	2	2	2	2
2	1	2003-06-15	16	3	2	2	0	3	1	1	2	1	2	2	2	2	1	1	65	3	2	2	2	2	2	2	2	2	2	2	2	2	2	1	#NULL!	1	1	63	3	2	2	2	2	2	2	2	2	2	2
2	1	2003-08-23	16	3	2	2	0	3	1	1	2	1	2	2	2	2	1	1	43	2	2	2	2	2	2	2	2	2	2	2	2	2	1	2	#NULL!	1	1	40	2	2	1	2	2	2	2	2	2	2	2
2	1	2004-02-07	15	3	2	2	0	3	1	1	2	1	2	2	2	2	1	1	45	3	2	2	2	2	2	2	2	2	2	2	2	2	2	1	#NULL!	1	1	45	3	2	2	2	2	2	2	2	2	2	2
1	3	2004-02-16	15	3	2	1	0	4	1	1	2	2	2	1	2	2	1	1	45	2	2	2	2	2	2	2	2	2	2	2	2	2	2	1	#NULL!	1	1	43	3	2	2	2	2	2	2	2	2	2	2
2	1	2003-10-12	16	3	2	2	1	4	1	1	1	1	2	2	2	2	1	1	44	3	2	2	2	2	2	2	2	2	2	2	2	2	2	1	#NULL!	1	1	39	3	2	2	2	2	2	2	2	2	2	2
1	1	2003-08-18	16	3	2	2	0	3	1	1	2	1	2	2	2	2	1	1	41	3	2	2	2	2	2	2	2	2	2	2	2	2	2	1	#NULL!	1	1	40	2	2	2	2	2	2	2	2	2	2	2
2	6	2003-12-23	15	3	2	2	0	3	2	1	1	1	2	2	2	2	1	1	43	2	2	2	2	2	2	2	2	2	2	2	2	2	2	1	#NULL!	1	1	39	2	2	2	2	2	2	2	2	2	2	2
1	1	2004-12-19	14	3	2	2	0	3	1	1	1	2	2	2	2	2	1	1	42	2	2	2	2	2	2	2	2	2	2	1	2	2	2	2	#NULL!	1	1	38	2	2	2	2	2	2	2	2	2	2	1
2	1	2003-07-16	16	3	2	2	0	3	1	1	2	1	2	2	2	2	1	1	48	2	2	2	2	2	2	2	2	2	2	1	2	2	2	2	#NULL!	1	1	41	2	2	2	2	2	1	2	2	2	2	1
2	5	2004-04-05	15	3	2	2	0	2	2	2	1	2	2	2	2	2	1	1	38	2	2	2	2	2	2	2	2	2	2	1	2	2	2	2	#NULL!	1	1	37	2	2	2	2	2	2	2	2	2	2	2
1	3	2003-10-05	16	3	2	1	1	2	1	1	2	2	2	2	2	2	1	2	#NULL!	2	2	2	2	2	2	2	2	2	2	2	2	2	2	1	#NULL!	1	2	#NULL!	4	2	2	2	2	2	2	2	2	2	2
1	3	2004-02-29	15	3	2	1	0	2	1	2	1	2	2	2	2	2	2	#NULL!	#NULL!	#NULL!	#NULL!	#NULL!	#NULL!	#NULL!	#NULL!	#NULL!	#NULL!	#NULL!	#NULL!	#NULL!	#NULL!	#NULL!	#NULL!	#NULL!	7	1	1	38	4	2	2	2	2	2	2	2	2	2	2
2	1	2003-03-21	16	3	2	2	0	5	1	1	1	1	2	2	2	2	1	1	43	3	2	2	2	2	2	2	2	2	2	2	2	2	2	1	#NULL!	1	1	39	2	2	2	2	2	2	2	2	2	2	2
1	1	2004-02-14	15	3	1	2	0	4	1	1	1	1	2	2	2	2	1	2	#NULL!	2	2	2	2	2	2	2	2	2	2	2	2	2	2	1	#NULL!	1	2	#NULL!	2	2	2	2	2	2	2	2	2	2	2
1	1	2004-09-16	15	3	2	2	0	2	1	2	1	2	2	2	2	2	1	1	42	2	2	2	2	2	2	2	2	2	2	2	2	2	2	1	#NULL!	1	1	39	2	2	2	2	2	2	2	2	2	2	2
1	1	2003-01-22	16	3	2	2	0	6	1	1	1	1	2	2	2	2	1	1	40	2	2	2	2	2	2	2	2	2	2	2	2	2	2	1	#NULL!	1	1	39	2	2	2	2	2	2	2	2	2	2	2
2	1	2003-05-09	16	3	2	2	0	4	1	1	1	1	2	2	2	2	1	1	45	2	2	2	2	2	2	2	2	2	2	2	2	2	2	1	#NULL!	1	1	41	2	2	2	2	2	2	2	2	2	2	2
2	1	2004-06-26	15	3	2	2	1	3	1	1	2	1	2	2	2	2	1	1	53	2	2	2	2	2	2	2	2	2	2	2	2	2	2	1	#NULL!	1	1	43	1	2	2	2	2	2	2	2	2	2	2
2	1	2003-06-28	16	3	2	2	0	3	1	1	2	1	2	2	2	2	1	1	51	3	2	2	2	2	2	2	2	2	2	2	2	2	2	1	#NULL!	1	1	43	3	2	2	2	2	2	2	2	2	2	2
1	1	2003-02-28	16	3	2	2	0	3	1	2	2	2	2	2	2	2	2	#NULL!	#NULL!	#NULL!	#NULL!	#NULL!	#NULL!	#NULL!	#NULL!	#NULL!	#NULL!	#NULL!	#NULL!	#NULL!	#NULL!	#NULL!	#NULL!	#NULL!	11	1	2	#NULL!	2	2	2	2	2	2	2	2	2	2	2
2	1	2003-11-14	16	3	2	2	0	4	1	1	1	1	2	2	2	2	1	1	42	3	2	2	2	2	2	2	2	2	2	2	2	2	2	1	#NULL!	1	1	39	2	2	2	2	2	2	2	2	2	2	2
2	1	2003-04-09	16	3	2	2	0	5	1	1	1	1	2	2	2	2	1	1	53	3	2	2	2	2	2	2	2	2	2	2	2	2	2	1	#NULL!	1	1	48	2	2	2	2	1	2	2	2	2	2	2
1	3	2002-10-10	17	3	2	2	0	5	1	1	1	2	2	2	1	2	1	1	46	2	2	2	2	2	2	2	2	2	2	2	2	2	2	1	#NULL!	1	1	42	2	2	2	2	2	2	2	2	2	2	2
1	3	2003-02-04	16	3	2	2	0	6	1	1	1	1	2	2	2	2	1	1	39	3	2	2	2	2	2	2	2	2	2	2	2	2	2	1	#NULL!	1	1	39	3	2	2	2	2	2	2	2	2	2	2
2	1	2004-01-09	15	3	2	2	0	5	1	1	1	1	2	2	2	2	1	1	45	3	2	2	2	2	2	2	2	2	2	2	2	2	2	1	#NULL!	1	1	37	3	2	2	2	2	2	2	2	2	2	2
1	3	2003-09-23	16	3	2	2	0	3	1	1	2	1	2	2	2	2	1	1	50	3	2	2	2	2	2	2	2	2	2	2	2	2	1	2	#NULL!	1	1	49	3	2	2	2	2	2	2	2	2	2	2
2	3	2004-01-16	15	3	2	2	0	3	1	1	2	1	2	2	2	2	1	1	41	3	2	2	2	2	2	2	2	2	2	2	2	2	2	1	#NULL!	1	1	40	4	2	2	2	2	2	2	2	2	2	2
1	3	2002-09-17	17	3	2	2	0	3	1	1	2	1	2	2	2	2	1	1	52	2	2	2	2	2	2	2	2	2	2	1	2	2	2	2	#NULL!	1	1	49	1	2	2	2	2	2	2	2	2	2	1
2	1	2003-04-20	16	3	2	2	0	1	2	2	1	2	2	2	2	2	1	1	44	2	2	2	2	2	2	2	2	2	2	2	2	2	1	2	#NULL!	1	1	34	2	2	2	2	2	2	2	2	2	2	1
2	1	2003-04-13	16	3	2	2	0	3	1	1	2	1	2	2	2	2	1	1	42	3	2	2	2	2	2	2	2	2	2	2	2	2	2	1	#NULL!	1	1	39	2	2	2	2	2	2	2	2	2	2	2
2	1	2003-07-16	16	3	2	2	0	3	1	1	1	2	2	2	2	2	1	1	53	2	2	2	2	2	2	2	2	2	2	2	2	2	2	1	#NULL!	1	1	47	1	2	2	2	2	2	2	2	2	2	2
2	1	2003-10-05	16	3	2	2	0	2	1	1	2	2	2	2	2	2	1	1	43	3	2	1	1	2	2	2	2	2	2	2	2	2	2	2	#NULL!	1	1	41	3	2	2	2	2	2	2	2	2	2	2
1	1	2003-07-22	16	3	2	2	0	3	1	1	2	1	2	2	2	2	1	1	46	3	2	2	2	2	2	2	2	2	2	2	2	2	2	1	#NULL!	1	1	48	2	2	2	2	2	2	2	2	2	2	2
1	1	2003-08-20	16	3	2	1	1	1	1	2	2	2	2	2	2	2	1	1	60	4	2	2	2	2	2	2	2	2	2	1	2	2	2	2	#NULL!	1	1	45	3	2	2	2	2	2	2	2	2	2	2
1	3	2004-02-06	15	3	2	2	0	5	1	1	1	1	2	2	2	2	1	1	39	3	2	2	2	2	2	2	2	2	2	2	2	2	1	2	#NULL!	1	1	38	2	2	2	2	2	2	2	2	2	2	2
2	6	2004-08-05	15	3	2	2	0	4	1	2	1	1	2	2	2	2	1	1	34	3	2	2	2	2	2	2	2	2	2	2	2	2	1	2	#NULL!	1	2	#NULL!	0	2	2	2	2	2	2	2	2	2	2
2	1	2004-04-25	15	3	2	2	0	3	1	1	2	2	2	2	2	1	1	1	56	5	2	2	2	2	2	2	2	2	2	2	2	2	1	2	#NULL!	1	1	45	3	2	2	2	2	2	2	2	2	2	2
1	1	2003-08-25	16	3	2	2	0	7	2	2	1	1	1	2	1	2	1	1	48	2	2	2	2	2	2	2	2	2	2	2	2	2	2	1	#NULL!	1	1	43	2	2	2	2	2	2	2	2	2	2	2
1	1	2003-10-28	16	3	2	1	0	3	1	1	1	2	2	2	2	2	1	1	41	3	2	2	2	2	2	2	2	2	2	2	2	2	2	1	#NULL!	1	1	40	4	2	2	2	2	2	2	2	2	2	2
1	1	2003-01-10	16	3	2	2	0	5	1	1	1	1	2	2	2	2	1	1	40	1	2	2	2	2	2	2	2	2	2	2	2	2	2	1	#NULL!	1	1	45	2	2	2	2	2	2	1	2	2	2	2
1	1	2003-08-07	16	3	1	2	0	1	2	2	2	1	2	2	2	2	1	2	#NULL!	2	2	2	2	2	2	2	2	2	2	2	2	2	2	1	#NULL!	1	2	#NULL!	3	2	2	2	2	2	2	2	2	2	2
1	6	2003-08-14	16	3	2	2	0	5	1	1	1	1	2	2	2	2	1	2	#NULL!	3	2	2	2	2	2	2	2	2	2	2	2	2	2	1	#NULL!	1	2	#NULL!	3	2	2	2	2	2	2	2	2	2	2
1	1	2002-02-14	17	3	2	2	0	4	1	1	2	1	2	2	2	2	1	2	#NULL!	3	2	2	2	2	2	2	2	2	2	2	2	2	2	1	#NULL!	1	1	37	3	2	2	2	2	2	2	2	2	2	2
2	6	2002-09-23	17	3	2	2	0	5	1	1	1	1	2	2	2	2	1	1	41	3	2	2	2	2	2	2	2	2	2	2	2	2	2	1	#NULL!	1	1	39	3	2	2	2	2	2	2	2	2	2	2
2	1	2003-09-13	16	3	2	2	0	2	1	2	2	1	2	2	2	2	2	#NULL!	#NULL!	#NULL!	#NULL!	#NULL!	#NULL!	#NULL!	#NULL!	#NULL!	#NULL!	#NULL!	#NULL!	#NULL!	#NULL!	#NULL!	#NULL!	#NULL!	8	1	1	45	0	2	2	2	2	2	2	2	2	2	1
2	1	2003-07-02	16	3	2	1	3	2	1	1	2	2	2	2	2	2	1	1	45	4	2	2	2	2	2	2	2	2	2	2	2	2	2	1	#NULL!	1	1	45	3	2	2	2	2	2	2	2	2	2	2
1	1	2003-04-01	16	3	2	2	0	2	1	1	2	2	2	2	2	2	1	1	58	2	2	2	2	2	2	2	2	2	2	2	2	2	2	1	#NULL!	1	1	46	2	2	2	2	2	2	2	2	2	2	2
1	1	2003-11-17	16	3	2	2	0	8	1	1	1	1	1	1	1	2	1	1	44	3	2	2	2	2	2	2	2	2	2	2	2	2	2	1	#NULL!	1	1	38	2	2	2	2	2	2	2	2	2	2	2
2	1	2003-09-20	16	3	2	2	0	2	1	1	2	2	2	2	2	2	1	1	45	3	2	2	2	2	2	2	2	2	2	2	2	2	2	1	#NULL!	1	1	43	2	2	2	2	2	2	2	2	2	2	1
2	1	2004-06-28	15	3	2	2	0	4	1	1	1	1	2	2	2	2	1	1	34	2	2	2	2	2	2	2	2	2	2	2	2	2	2	1	#NULL!	1	1	34	3	2	2	2	2	2	2	2	2	2	2
2	1	2003-03-03	16	3	2	2	0	3	2	1	2	1	2	2	2	1	1	1	52	2	2	2	2	2	2	2	2	2	2	2	2	2	2	1	#NULL!	2	#NULL!	#NULL!	#NULL!	#NULL!	#NULL!	#NULL!	#NULL!	#NULL!	#NULL!	#NULL!	#NULL!	#NULL!	#NULL!
1	3	2003-04-20	16	3	1	1	0	3	1	1	2	2	2	1	2	2	1	1	33	3	2	2	2	2	2	2	2	2	2	1	2	2	2	2	#NULL!	1	1	34	1	2	2	2	2	2	2	2	2	2	2
1	1	2002-07-16	17	3	2	2	0	4	1	1	1	1	2	2	2	2	1	2	#NULL!	4	2	2	2	2	2	2	2	2	2	2	2	2	2	1	#NULL!	1	2	#NULL!	0	2	2	2	2	2	2	2	2	2	2
2	1	2004-12-25	14	3	2	2	0	3	1	1	1	2	2	2	2	2	1	1	47	3	2	2	2	2	2	2	2	2	2	2	2	2	2	1	#NULL!	1	1	41	2	2	2	1	2	2	2	2	2	2	1
2	1	2003-04-12	16	3	2	2	0	3	1	1	2	1	2	2	2	2	1	1	43	1	2	2	2	2	2	2	2	2	2	1	2	2	1	2	#NULL!	1	1	36	2	2	2	2	2	2	2	2	2	2	1
2	1	2003-01-12	16	3	2	2	0	3	1	1	2	1	2	2	2	2	1	1	48	2	2	2	2	2	2	2	2	2	2	2	2	2	2	1	#NULL!	1	1	44	2	2	2	2	2	2	2	2	2	2	2
1	1	2003-04-18	16	3	1	1	0	2	1	1	2	2	2	2	2	2	1	1	40	3	2	2	2	2	2	2	2	2	2	2	2	2	2	1	#NULL!	1	1	42	3	2	2	2	2	2	2	2	2	2	2
1	1	2004-01-27	15	3	2	1	0	2	1	1	2	2	2	2	2	2	1	2	#NULL!	2	2	2	2	2	2	2	2	2	2	2	2	2	2	1	#NULL!	1	2	#NULL!	3	2	2	2	2	2	2	2	2	2	2
2	1	2008-11-14	11	1	1	2	0	4	1	1	2	1	2	2	2	2	1	2	#NULL!	2	2	2	2	2	2	2	2	2	2	2	2	2	2	1	#NULL!	1	1	35	2	2	2	2	2	2	2	2	2	2	2
1	1	2009-10-11	10	1	1	2	0	4	1	1	1	1	2	2	2	2	1	2	#NULL!	2	2	2	2	2	2	2	2	2	2	2	2	2	2	1	#NULL!	1	2	#NULL!	2	2	2	2	2	2	2	2	2	2	2
1	1	2008-12-22	10	1	1	2	0	3	2	1	1	1	2	2	2	2	1	2	#NULL!	2	2	2	2	2	2	2	2	2	2	2	2	2	2	1	#NULL!	1	2	#NULL!	0	2	2	2	2	2	2	2	2	2	2
1	1	2008-03-13	11	1	1	2	0	7	1	1	1	1	2	2	2	2	1	2	#NULL!	2	2	2	2	2	2	2	2	2	2	2	2	2	2	1	#NULL!	1	2	#NULL!	2	2	2	2	2	2	2	2	2	2	2
1	1	2007-10-08	12	1	1	2	0	4	1	1	2	1	2	2	2	2	1	2	#NULL!	3	2	2	2	2	2	2	2	2	2	2	2	2	2	1	#NULL!	1	1	30	2	2	2	1	2	2	2	2	2	2	2
1	3	2007-01-24	12	1	1	2	0	3	1	2	1	2	2	2	2	2	1	2	#NULL!	3	2	2	2	2	2	2	2	2	2	2	2	2	2	1	#NULL!	1	2	#NULL!	2	2	2	1	2	2	2	2	2	2	2
1	1	2008-02-06	11	1	2	2	1	3	1	1	2	1	2	2	2	2	1	1	49	2	2	2	2	2	2	1	2	2	2	2	2	2	2	2	#NULL!	1	2	#NULL!	1	2	2	2	2	2	2	2	2	2	2
2	1	2008-08-26	11	1	1	2	0	4	1	1	2	1	2	2	2	2	1	1	33	2	2	2	2	2	2	2	2	2	2	2	2	2	2	1	#NULL!	1	1	31	3	2	2	2	2	2	2	2	2	2	2
1	1	2007-09-11	12	1	1	1	0	2	1	1	2	2	2	2	2	2	1	1	46	3	2	2	2	2	2	2	2	2	2	2	2	2	2	1	#NULL!	1	1	41	3	2	2	2	2	2	2	2	2	2	2
2	1	2007-04-05	12	1	1	1	0	2	2	1	1	2	2	2	2	2	1	1	30	2	2	2	2	2	2	1	2	2	2	2	2	2	2	2	#NULL!	1	2	#NULL!	2	2	2	2	2	2	2	2	2	2	2
1	1	2008-05-25	11	1	1	2	0	3	1	2	1	1	2	2	2	2	2	#NULL!	#NULL!	#NULL!	#NULL!	#NULL!	#NULL!	#NULL!	#NULL!	#NULL!	#NULL!	#NULL!	#NULL!	#NULL!	#NULL!	#NULL!	#NULL!	#NULL!	11	1	1	35	2	2	2	2	2	2	2	2	2	2	2
1	1	2008-07-17	11	1	1	2	0	6	1	1	1	1	2	2	2	2	1	1	50	2	2	2	2	2	2	2	2	2	2	2	2	2	2	1	#NULL!	1	1	54	2	2	2	2	2	2	2	2	2	2	2
2	1	2007-10-09	12	1	1	2	0	5	1	1	1	1	2	2	2	2	1	2	#NULL!	3	2	2	2	2	2	2	2	2	2	2	2	2	2	1	#NULL!	1	1	50	2	2	2	2	2	2	2	2	2	2	2
2	1	2007-08-13	12	1	1	2	0	5	1	1	1	1	2	2	2	2	1	2	#NULL!	3	2	2	2	2	2	2	2	2	2	2	2	2	2	1	#NULL!	1	2	#NULL!	3	2	2	2	2	2	2	2	2	2	2
2	1	2007-03-12	12	1	1	2	0	3	1	1	2	1	2	2	2	2	1	1	32	2	2	2	2	2	2	2	2	2	2	2	2	2	2	1	#NULL!	1	1	31	2	2	2	2	2	2	2	2	2	2	2
2	1	2008-12-16	10	1	1	2	1	6	1	1	2	1	2	2	2	2	1	2	#NULL!	3	2	2	2	2	2	2	2	2	2	2	2	2	2	1	#NULL!	1	2	#NULL!	2	2	2	2	2	2	2	2	2	2	2
1	1	2008-12-04	11	1	1	2	0	5	1	1	1	1	2	2	2	2	1	2	#NULL!	3	2	2	2	2	2	2	2	2	2	2	2	2	2	1	#NULL!	1	2	#NULL!	2	2	2	2	2	2	2	2	2	2	2
2	1	2008-07-30	11	1	1	2	0	2	2	1	2	1	2	2	2	2	1	2	#NULL!	2	2	2	2	2	2	2	2	2	2	2	2	2	2	1	#NULL!	1	2	#NULL!	3	2	2	2	2	2	2	2	2	2	2
1	1	2008-08-13	11	1	1	2	1	4	1	1	2	1	2	2	2	2	1	2	#NULL!	0	2	2	2	2	2	2	2	2	2	2	2	2	2	1	#NULL!	1	2	#NULL!	3	2	2	2	2	2	2	2	2	2	2
1	1	2007-09-29	12	1	2	1	0	3	1	1	1	2	2	2	2	2	1	2	#NULL!	2	2	2	2	2	2	2	2	2	2	2	2	2	2	1	#NULL!	1	2	#NULL!	2	2	2	2	2	2	2	2	2	2	2
1	1	2007-10-04	12	1	1	2	0	4	1	1	2	1	2	2	2	2	1	2	#NULL!	2	2	2	2	2	2	2	2	2	2	2	2	2	2	1	#NULL!	1	1	45	2	2	2	2	2	2	2	2	2	2	2
2	1	2008-05-05	11	1	2	2	0	3	2	2	1	1	1	2	2	2	#NULL!	#NULL!	#NULL!	#NULL!	#NULL!	#NULL!	#NULL!	#NULL!	#NULL!	#NULL!	#NULL!	#NULL!	#NULL!	#NULL!	#NULL!	#NULL!	#NULL!	#NULL!	#NULL!	1	1	43	2	2	1	2	2	2	2	2	2	2	2
2	1	2006-12-01	13	1	1	2	1	3	1	1	2	1	2	2	2	2	1	2	#NULL!	2	2	2	2	2	2	2	2	2	2	2	2	2	2	1	#NULL!	1	2	#NULL!	2	2	2	2	2	2	2	2	2	2	2
2	1	2008-02-12	11	1	1	2	0	5	1	1	1	1	2	2	2	2	1	1	42	2	2	2	2	2	2	2	2	2	2	2	2	2	2	1	#NULL!	1	1	42	2	2	2	2	2	2	2	2	2	2	2
2	1	2009-05-23	10	1	1	2	0	5	1	1	1	1	2	2	2	2	1	2	#NULL!	0	2	2	2	2	2	2	2	2	2	2	2	2	2	1	#NULL!	1	2	#NULL!	3	2	2	2	2	2	2	2	2	2	2
1	6	2008-09-06	11	1	1	2	0	5	1	1	2	1	2	2	2	2	1	2	#NULL!	2	2	2	2	2	2	2	2	2	2	2	2	2	2	1	#NULL!	1	1	33	3	2	2	2	2	2	2	2	2	2	2
2	1	2008-05-08	11	1	1	2	0	3	1	1	2	1	2	2	2	2	1	2	#NULL!	3	2	2	2	2	2	2	2	2	2	2	2	2	2	1	#NULL!	1	2	#NULL!	2	2	2	2	2	2	2	2	2	2	2
2	1	2008-02-20	11	1	1	2	0	1	2	2	1	2	2	2	2	2	2	#NULL!	#NULL!	#NULL!	#NULL!	#NULL!	#NULL!	#NULL!	#NULL!	#NULL!	#NULL!	#NULL!	#NULL!	#NULL!	#NULL!	#NULL!	#NULL!	#NULL!	10	1	2	#NULL!	0	2	2	2	2	2	2	2	2	2	2
2	1	2009-02-09	10	1	1	2	0	5	1	1	1	1	2	2	2	2	1	1	35	2	2	2	2	2	2	2	2	2	2	2	2	2	1	2	#NULL!	1	1	32	3	2	2	2	2	2	2	2	2	2	2
2	1	2009-06-23	10	1	1	2	0	3	1	1	2	1	2	2	2	2	1	2	#NULL!	3	2	2	2	2	2	2	2	2	2	2	2	2	2	1	#NULL!	1	2	#NULL!	2	2	2	2	2	2	2	2	2	2	2
2	1	2008-07-02	11	1	1	2	1	4	1	1	1	1	2	2	2	2	1	1	38	3	2	2	2	2	2	2	2	2	2	2	2	2	2	1	#NULL!	1	1	32	3	2	2	2	2	2	2	2	2	2	2
2	1	2008-12-05	11	1	1	2	0	4	1	1	2	1	2	2	2	2	1	1	37	2	2	2	2	2	2	2	2	2	2	2	2	2	2	1	#NULL!	1	1	32	2	2	2	2	2	2	2	2	2	2	2
2	1	2008-08-08	11	1	1	2	0	4	1	1	1	1	2	2	2	2	1	2	#NULL!	2	2	2	2	2	2	2	2	2	2	2	2	2	2	1	#NULL!	1	2	#NULL!	2	2	2	2	2	2	2	2	2	2	2
2	1	2009-06-15	10	1	1	2	0	4	1	1	2	1	2	2	2	2	1	2	#NULL!	2	2	2	2	2	2	2	2	2	2	2	2	2	2	1	#NULL!	1	2	#NULL!	1	2	2	2	2	2	2	2	2	2	2
2	1	2009-06-21	10	1	1	2	0	4	1	1	1	1	2	2	2	2	1	2	#NULL!	0	2	2	2	2	2	2	2	2	2	2	2	2	2	1	#NULL!	1	2	#NULL!	0	2	2	2	2	2	2	2	2	2	2
2	1	2009-05-27	10	1	1	2	0	5	1	1	1	1	2	2	2	2	1	1	37	2	2	2	2	2	2	2	2	2	2	2	2	2	2	1	#NULL!	1	1	32	2	2	2	2	2	2	2	2	2	2	2
2	1	2009-04-02	10	1	1	2	0	4	1	1	1	1	2	2	2	2	1	1	43	2	2	2	2	2	2	2	2	2	2	2	2	2	2	1	#NULL!	1	2	#NULL!	2	2	2	2	2	2	2	2	2	2	2
2	1	2009-02-27	10	1	1	2	1	3	1	1	2	1	2	2	2	2	1	1	38	2	2	2	2	2	2	2	2	2	2	2	1	2	2	2	#NULL!	1	1	36	2	2	2	2	2	2	2	2	2	2	2
2	1	2007-01-26	12	1	1	1	0	2	1	1	2	2	2	2	2	2	1	1	31	2	2	2	2	2	2	2	2	2	2	2	2	2	2	1	#NULL!	1	1	30	2	2	2	2	2	2	2	2	2	2	2
2	1	2004-08-20	15	2	2	2	0	6	1	1	1	1	1	1	2	2	1	1	45	3	2	2	2	2	2	2	2	2	2	2	2	2	2	1	#NULL!	1	1	38	2	2	2	2	2	2	2	2	2	2	2
2	1	2005-06-14	14	2	2	1	1	2	1	2	2	2	2	2	2	1	2	#NULL!	#NULL!	#NULL!	#NULL!	#NULL!	#NULL!	#NULL!	#NULL!	#NULL!	#NULL!	#NULL!	#NULL!	#NULL!	#NULL!	#NULL!	#NULL!	#NULL!	11	1	1	41	1	2	2	2	2	2	2	2	2	2	2
2	1	2005-12-19	13	2	2	2	2	3	1	1	2	1	2	2	2	2	1	2	#NULL!	2	2	2	2	2	2	2	2	2	2	2	2	2	2	1	#NULL!	1	1	38	3	2	2	2	2	2	2	2	2	2	2
2	1	2006-01-08	13	2	2	2	0	3	1	1	2	1	2	2	2	2	1	1	45	3	2	2	2	2	2	2	2	2	2	2	2	2	2	1	#NULL!	1	1	34	3	2	2	2	2	2	2	2	2	2	2
2	1	2003-08-02	16	2	2	2	0	3	1	1	2	1	2	2	2	2	1	1	45	2	2	2	2	2	2	2	2	2	2	2	2	2	2	1	#NULL!	1	1	41	1	2	2	2	2	2	2	2	2	2	2
1	1	2004-12-28	14	2	2	2	0	3	1	2	2	1	2	2	2	2	2	#NULL!	#NULL!	#NULL!	#NULL!	#NULL!	#NULL!	#NULL!	#NULL!	#NULL!	#NULL!	#NULL!	#NULL!	#NULL!	#NULL!	#NULL!	#NULL!	#NULL!	10	1	1	43	2	2	2	2	2	2	2	2	2	2	1
1	1	2004-06-22	15	2	2	2	0	2	2	2	1	2	2	2	2	2	1	1	46	3	2	2	2	2	2	1	2	2	2	2	2	2	2	2	#NULL!	1	1	42	2	2	2	2	2	2	2	2	2	2	2
2	1	2004-06-22	15	2	2	2	0	3	1	1	2	1	2	2	2	2	1	1	50	3	2	2	2	2	2	2	2	2	2	2	2	2	2	1	#NULL!	1	1	45	3	2	2	2	2	2	2	2	2	2	2
2	1	2004-02-07	15	2	2	2	0	5	1	1	2	1	2	2	2	2	1	2	#NULL!	3	2	2	2	2	2	2	2	2	2	2	2	2	2	1	#NULL!	1	2	#NULL!	3	2	2	2	2	2	2	2	2	2	2
2	6	2004-03-25	15	2	2	1	1	2	2	2	1	2	2	2	2	2	1	1	40	3	2	2	1	2	2	2	2	2	2	2	2	2	2	2	#NULL!	1	2	#NULL!	3	2	2	2	2	2	2	2	2	2	2
1	1	2005-03-07	14	2	2	1	0	6	2	1	2	2	1	1	2	2	1	2	#NULL!	3	2	2	2	2	2	2	2	2	2	2	2	2	2	1	#NULL!	#NULL!	#NULL!	#NULL!	#NULL!	#NULL!	#NULL!	#NULL!	#NULL!	#NULL!	#NULL!	#NULL!	#NULL!	#NULL!	#NULL!
1	1	2005-03-17	14	2	2	2	0	4	1	1	1	1	2	2	2	2	1	2	#NULL!	3	2	2	2	2	2	2	2	2	2	2	2	2	2	1	#NULL!	1	2	#NULL!	3	2	2	2	2	2	2	2	2	2	2
2	1	2006-04-30	13	2	2	2	0	3	1	1	2	1	2	2	2	2	1	1	49	2	2	2	2	2	2	2	2	2	2	2	2	2	2	1	#NULL!	1	1	43	2	2	2	2	2	2	2	2	2	2	2
1	1	2006-07-28	13	2	2	2	1	3	2	2	1	2	2	2	2	2	1	1	44	1	1	2	2	2	2	2	2	2	2	2	2	2	2	2	#NULL!	1	2	#NULL!	2	2	2	2	2	2	2	2	2	2	2
1	1	2006-01-24	13	2	2	2	0	6	1	1	1	1	2	1	1	2	1	2	#NULL!	3	2	2	2	2	2	2	2	2	2	2	2	2	2	1	#NULL!	1	2	#NULL!	3	2	2	2	2	2	2	2	2	2	2
1	1	2005-08-01	14	2	2	2	0	4	1	1	1	2	2	2	2	2	1	1	41	2	2	2	2	2	2	2	2	2	2	2	2	2	2	1	#NULL!	1	1	42	2	2	2	2	2	2	2	2	2	2	1
2	1	2004-10-20	15	2	2	2	0	5	1	1	1	1	2	2	2	2	1	1	40	3	2	2	2	2	2	2	2	2	2	2	2	2	2	1	#NULL!	1	1	41	3	2	2	2	2	2	2	2	2	2	2
1	1	2006-06-13	13	2	2	2	0	5	1	1	1	1	2	2	2	2	1	1	39	3	2	2	2	2	2	2	2	2	2	2	2	2	2	1	#NULL!	1	1	37	2	2	2	2	2	2	2	2	2	2	2
2	3	2005-12-09	13	2	2	2	0	3	1	1	2	1	2	2	2	2	1	1	41	3	2	2	2	2	2	2	2	2	2	2	2	2	2	1	#NULL!	1	1	36	3	2	2	2	2	2	2	2	2	2	2
2	1	2004-03-28	15	2	2	2	0	4	1	1	2	1	2	2	2	2	1	1	55	2	2	2	2	2	2	2	2	2	2	2	2	2	2	1	#NULL!	1	1	38	2	2	2	2	2	2	2	2	2	2	2
1	1	2005-11-04	14	2	2	2	0	4	1	1	1	2	2	2	2	2	1	1	52	3	2	2	2	2	2	2	2	2	2	2	2	2	2	1	#NULL!	1	1	50	3	2	2	2	2	2	2	2	2	2	1
1	1	2005-05-01	14	2	2	2	0	4	1	1	1	1	2	2	2	2	1	1	43	1	2	2	2	2	2	2	2	2	2	2	2	2	2	1	#NULL!	1	1	42	2	2	2	2	2	2	2	2	2	2	2
1	1	2003-11-13	16	2	2	2	0	4	1	1	1	1	2	2	2	2	1	1	44	2	2	2	2	2	2	2	2	2	2	2	2	2	2	1	#NULL!	1	1	40	3	2	2	2	2	2	2	2	2	2	2
1	1	2004-12-08	14	2	2	2	0	3	1	1	2	1	2	2	2	2	1	1	38	4	2	2	2	2	2	2	2	2	2	2	2	2	2	1	#NULL!	1	2	#NULL!	5	2	2	2	2	2	2	2	2	2	2
1	1	2004-01-04	15	2	2	2	0	3	1	1	2	1	2	2	2	2	1	1	45	2	2	2	2	2	2	2	2	2	2	1	2	2	2	2	#NULL!	1	1	44	3	2	2	2	2	2	2	2	2	2	1
1	1	2003-03-28	16	2	2	2	0	2	1	1	2	2	2	2	2	2	1	2	#NULL!	0	2	2	2	2	2	2	2	2	2	2	2	2	2	1	#NULL!	1	2	#NULL!	0	2	2	2	2	2	2	2	2	2	2
1	5	2006-03-24	13	2	2	2	0	1	2	2	1	2	2	2	2	2	1	2	#NULL!	3	2	2	2	2	2	2	2	2	2	2	2	2	2	1	#NULL!	1	2	#NULL!	3	2	2	2	2	2	2	2	2	2	2
2	5	2006-10-01	13	2	2	2	2	3	1	1	1	2	2	2	2	2	1	1	43	2	2	2	2	2	2	2	2	2	2	2	2	2	2	1	#NULL!	1	1	37	3	2	2	2	2	2	2	2	2	2	2
2	1	2004-07-01	15	2	2	2	0	4	1	1	1	1	2	2	2	2	1	1	40	2	2	2	2	2	2	2	2	2	2	2	2	2	2	1	#NULL!	1	1	35	2	2	2	2	2	2	2	2	2	2	2
2	1	2005-05-09	14	2	2	2	0	4	1	1	2	1	2	2	2	2	1	1	41	3	2	2	2	2	2	2	2	2	2	2	2	2	2	1	#NULL!	1	1	40	3	2	2	2	2	2	2	2	2	2	2
2	1	2003-12-25	15	2	2	2	0	4	1	1	2	1	2	2	2	2	1	1	48	3	2	2	2	2	2	2	2	2	2	2	2	2	2	1	#NULL!	1	1	45	2	2	2	2	2	2	2	2	2	2	2
2	1	2005-03-24	14	2	2	2	0	4	1	1	2	1	2	2	2	2	1	1	38	3	2	2	2	2	2	2	2	2	2	2	2	2	2	1	#NULL!	1	1	39	3	2	2	2	2	2	2	2	2	2	1
1	1	2004-05-14	15	2	2	2	0	2	1	1	2	2	2	2	2	2	1	1	42	2	2	2	2	2	2	2	2	2	2	2	2	2	2	1	#NULL!	1	1	41	1	2	2	2	2	2	2	2	2	2	2
1	1	2005-12-05	14	2	2	1	1	3	1	1	1	2	2	2	2	2	1	2	#NULL!	0	2	2	2	2	2	2	2	2	2	2	2	2	2	1	#NULL!	1	1	39	3	2	2	2	2	2	2	2	2	2	2
1	1	2004-11-26	15	2	2	2	1	3	1	1	2	1	2	2	2	2	1	2	#NULL!	2	2	2	2	2	2	2	2	2	2	2	2	2	2	1	#NULL!	1	2	#NULL!	2	2	2	2	2	2	2	2	2	2	2
1	1	2009-08-27	10	2	2	1	0	2	1	1	2	2	2	2	2	2	1	1	60	2	2	2	2	2	2	2	2	2	2	2	2	2	2	1	#NULL!	1	1	50	2	2	2	1	2	2	2	2	2	2	2
1	1	2004-10-22	15	2	2	2	0	4	1	1	2	1	2	2	2	2	1	1	42	2	2	2	2	2	2	2	2	2	2	2	2	2	2	1	#NULL!	1	1	38	3	2	2	2	2	2	2	2	2	2	2
1	1	2004-07-14	15	2	2	2	0	2	1	2	2	1	2	2	2	2	1	1	45	2	2	2	2	2	2	2	2	2	2	2	2	2	2	1	#NULL!	1	1	43	2	2	2	2	2	2	2	2	2	2	2
1	1	2004-12-25	14	2	2	2	0	3	1	1	2	1	2	2	2	2	1	1	42	3	2	2	2	2	2	2	2	2	2	2	2	2	2	1	#NULL!	1	1	39	3	2	2	2	2	2	2	2	2	2	2
2	1	2003-10-13	16	2	2	2	0	2	1	1	2	2	2	2	2	2	1	1	42	2	2	2	2	2	2	2	2	2	2	2	2	2	2	1	#NULL!	1	1	42	2	2	2	2	2	2	2	2	2	2	2
1	3	2004-06-15	15	2	2	1	0	4	1	1	1	2	2	2	2	2	1	1	38	2	2	2	2	2	2	2	2	2	2	1	2	2	1	2	#NULL!	1	1	32	3	2	2	2	2	2	2	2	2	2	2
2	1	2005-01-30	14	2	2	2	1	3	1	2	1	1	2	2	2	2	1	1	38	4	2	2	2	2	2	2	2	2	2	2	2	2	2	1	#NULL!	1	1	32	3	2	2	2	2	2	2	2	2	2	2
1	1	2005-02-08	14	2	2	2	0	3	1	1	1	2	2	2	2	2	1	2	#NULL!	3	2	2	2	2	2	2	2	2	2	2	2	2	2	1	#NULL!	1	2	#NULL!	3	2	2	2	2	2	2	2	2	2	2
2	1	2005-12-23	13	2	2	2	0	6	1	1	2	1	2	2	2	2	1	1	40	3	2	2	2	2	2	2	2	2	2	2	2	2	2	1	#NULL!	1	1	39	3	2	2	2	2	2	2	2	2	2	2
2	1	2005-08-01	14	2	2	2	0	2	2	1	2	2	2	2	2	1	1	1	51	4	2	2	2	2	2	2	2	2	2	2	2	2	2	1	#NULL!	2	#NULL!	#NULL!	#NULL!	#NULL!	#NULL!	#NULL!	#NULL!	#NULL!	#NULL!	#NULL!	#NULL!	#NULL!	#NULL!
2	1	2005-12-30	13	2	2	2	0	2	1	1	2	2	2	2	2	2	1	1	44	3	2	2	2	2	2	2	2	2	2	2	2	2	2	1	#NULL!	1	1	45	3	2	2	2	2	2	2	2	2	2	2
2	1	2005-04-20	14	2	2	2	0	5	1	1	1	1	2	2	2	2	1	1	39	2	2	2	2	2	2	2	2	2	2	2	2	2	2	1	#NULL!	1	1	37	4	2	2	2	2	2	2	2	2	2	1
1	1	2003-05-30	16	2	2	2	0	4	1	1	2	1	2	2	2	2	1	1	53	2	2	2	2	2	2	2	2	2	2	2	2	2	2	1	#NULL!	1	1	55	1	2	2	2	2	2	2	2	2	2	2
2	1	2005-12-22	13	2	2	2	0	6	1	1	2	1	2	2	2	2	1	1	48	2	2	2	2	2	2	2	2	2	2	2	2	2	2	1	#NULL!	1	1	40	3	2	2	2	2	2	2	2	2	2	2
1	1	2007-07-05	12	2	2	2	0	3	2	2	2	2	1	2	2	2	1	1	32	3	2	2	1	2	2	2	2	2	2	2	2	2	2	2	#NULL!	1	2	#NULL!	3	2	1	2	2	2	2	2	2	2	2
1	1	2005-01-18	14	2	2	2	0	3	1	1	2	2	1	2	2	2	1	1	42	2	2	2	2	2	2	2	2	2	2	2	2	2	2	1	#NULL!	1	1	49	3	2	2	2	2	2	2	2	2	2	2
1	1	2005-08-09	14	2	2	2	0	5	1	1	1	1	2	2	2	2	1	1	41	5	2	2	2	2	2	2	2	2	2	2	2	2	2	1	#NULL!	1	1	39	5	2	2	2	2	2	2	2	2	2	2
2	6	2004-08-18	15	2	2	2	0	6	1	1	1	1	2	2	2	2	1	1	36	3	2	2	2	2	2	2	2	2	2	2	2	2	2	1	#NULL!	1	1	35	3	2	2	2	2	2	2	2	2	2	2
1	1	2005-08-27	14	2	2	2	0	7	1	1	1	1	1	1	2	2	1	2	#NULL!	3	2	2	2	2	2	2	2	2	2	2	2	2	2	1	#NULL!	1	2	#NULL!	3	2	2	2	2	2	2	2	2	2	2
2	1	2006-09-21	13	2	2	2	1	3	1	1	2	1	2	2	2	2	1	2	#NULL!	3	2	2	2	2	2	2	2	2	2	2	2	2	2	1	#NULL!	1	2	#NULL!	3	2	2	2	2	2	2	2	2	2	2
2	3	2004-05-21	15	2	2	2	0	3	1	1	2	1	2	2	2	2	1	1	46	2	2	2	2	2	2	2	2	2	2	2	2	2	2	1	#NULL!	1	1	36	3	2	2	2	2	2	2	2	2	2	2
2	6	2002-04-04	17	2	2	2	2	2	1	1	2	2	2	2	2	2	2	#NULL!	#NULL!	#NULL!	#NULL!	#NULL!	#NULL!	#NULL!	#NULL!	#NULL!	#NULL!	#NULL!	#NULL!	#NULL!	#NULL!	#NULL!	#NULL!	#NULL!	14	1	1	42	1	2	2	1	2	2	2	2	2	2	2
2	1	2005-02-04	14	2	2	2	0	6	1	1	1	1	2	2	2	2	1	1	46	3	2	2	2	2	2	2	2	2	2	2	2	2	2	1	#NULL!	1	1	38	2	2	2	2	2	2	2	2	2	2	2
2	1	2005-09-02	14	2	2	2	0	3	1	1	2	1	2	2	2	2	1	1	50	2	2	2	2	2	2	2	2	2	2	2	2	2	2	1	#NULL!	1	1	49	3	2	2	2	2	2	2	2	2	2	2
2	6	2005-06-20	14	2	2	2	0	2	1	1	2	2	2	2	2	2	1	1	42	1	2	2	2	2	2	2	2	2	2	2	2	2	2	1	#NULL!	1	1	41	2	2	2	2	2	2	2	2	2	2	2
1	1	2005-01-25	14	2	2	2	0	4	1	1	1	1	2	2	2	2	1	1	43	3	2	2	1	2	2	2	2	2	2	2	2	2	2	2	#NULL!	1	1	42	3	2	2	2	2	2	2	2	2	2	2
1	1	2004-11-17	15	2	2	1	0	4	1	1	1	2	2	2	2	2	1	1	43	1	2	2	2	1	2	2	2	2	2	2	2	2	2	2	#NULL!	1	1	40	3	2	2	2	2	2	2	2	2	2	2
2	1	2005-11-14	14	2	2	2	0	4	1	1	1	1	2	2	2	2	1	2	#NULL!	3	2	2	2	2	2	2	2	2	2	2	2	2	2	1	#NULL!	1	2	#NULL!	3	2	2	2	2	2	2	2	2	2	2
1	6	2004-01-23	15	2	2	2	1	3	1	1	2	2	2	2	2	1	1	2	#NULL!	2	2	2	2	2	2	2	2	2	2	2	2	2	2	1	#NULL!	1	1	40	2	2	2	2	2	2	2	2	2	2	1
1	1	2004-11-12	15	2	2	2	0	3	1	1	2	1	2	2	2	2	1	1	40	3	2	2	2	2	2	2	2	2	2	2	2	2	2	1	#NULL!	1	1	38	3	2	2	2	2	2	2	2	2	2	2
1	1	2004-01-31	15	2	2	2	0	4	1	1	2	1	2	2	2	2	1	1	39	3	2	2	2	2	2	2	2	2	2	2	2	2	2	1	#NULL!	1	1	37	4	2	2	2	2	2	2	2	2	2	2
1	1	2004-01-13	15	2	2	2	0	4	1	1	2	1	2	2	2	2	1	1	51	2	2	2	1	2	2	2	2	2	2	2	2	2	2	2	#NULL!	1	1	48	2	2	2	1	2	2	2	2	2	2	2
2	1	2005-08-25	14	2	2	2	0	3	1	1	2	1	2	2	2	2	1	1	45	3	2	2	2	2	2	2	2	2	2	2	2	2	2	1	#NULL!	1	1	44	2	2	2	2	2	2	2	2	2	2	2
2	1	2004-12-16	14	2	2	2	0	2	2	2	1	2	2	2	2	2	1	1	43	2	2	2	2	2	2	2	2	2	2	2	2	2	2	1	#NULL!	1	1	36	2	2	2	2	2	2	2	2	2	2	2
1	1	2005-06-10	14	2	2	2	0	5	1	1	2	1	2	1	2	2	1	1	43	3	2	2	2	2	2	2	2	2	2	2	2	2	2	1	#NULL!	1	1	41	3	2	2	2	2	2	2	2	2	2	2
2	1	2006-06-10	13	2	2	2	0	4	2	2	1	1	2	2	2	2	1	1	39	3	2	2	2	2	2	2	2	2	2	2	2	2	2	1	#NULL!	1	1	38	3	2	2	2	2	2	2	2	2	2	2
1	3	2004-04-18	15	2	2	2	0	4	1	1	1	1	2	2	2	2	1	1	37	2	2	2	2	2	2	2	2	2	2	2	2	2	2	1	#NULL!	1	1	35	2	2	2	2	2	2	2	2	2	2	2
1	6	2004-07-03	15	2	2	2	0	3	1	1	1	2	2	2	2	2	1	1	47	1	2	2	2	1	2	2	2	2	2	2	2	2	2	2	#NULL!	1	1	43	1	2	2	2	1	2	2	2	2	2	1
2	1	2005-04-09	14	2	2	2	1	2	2	2	1	2	2	2	2	2	1	2	#NULL!	0	2	2	2	2	2	2	2	2	2	2	2	2	2	1	#NULL!	1	1	41	3	2	2	2	2	2	2	2	2	2	2
2	1	2004-04-23	15	2	2	2	0	5	1	1	2	1	1	2	2	2	1	1	40	2	2	2	2	2	2	2	2	2	2	2	2	2	2	1	#NULL!	1	1	41	3	2	2	2	2	2	2	2	2	2	2
2	1	2004-08-12	15	2	2	2	1	3	1	1	2	1	2	2	2	2	1	2	#NULL!	2	2	2	2	2	2	2	2	2	2	2	2	2	2	1	#NULL!	1	1	39	2	2	2	2	2	2	2	2	2	2	2
1	1	2005-10-12	14	2	2	2	0	2	1	1	2	2	2	2	2	2	1	2	#NULL!	3	2	2	2	2	2	2	2	2	2	2	2	2	2	1	#NULL!	1	2	#NULL!	2	2	2	2	2	2	2	2	2	2	2
2	1	2005-12-16	13	2	2	2	0	5	1	1	2	1	2	2	2	2	1	1	37	3	2	2	2	2	2	2	2	2	2	2	2	2	2	1	#NULL!	1	1	35	2	2	2	2	2	2	2	2	2	2	2
2	1	2005-10-21	14	2	2	2	0	3	1	1	2	1	2	2	2	2	1	1	42	2	1	2	2	2	2	2	2	2	2	2	2	2	2	2	#NULL!	1	1	48	2	2	2	2	2	2	2	2	2	2	2
2	1	2004-07-22	15	2	2	2	0	3	1	1	2	1	2	2	2	2	1	1	41	2	2	2	2	2	2	2	2	2	2	2	2	2	2	1	#NULL!	1	1	38	2	2	2	2	2	2	2	2	2	2	2
1	1	2004-09-16	15	2	2	2	0	6	1	1	1	1	2	2	2	2	1	1	48	2	2	2	2	2	2	2	2	2	2	2	2	2	2	1	#NULL!	1	1	45	3	2	2	2	2	2	2	2	2	2	2
1	1	2003-06-03	16	2	2	2	0	5	1	1	2	1	2	2	2	2	1	2	#NULL!	2	2	2	2	2	2	2	2	2	2	2	2	2	2	1	#NULL!	1	2	#NULL!	2	2	2	2	2	2	2	2	2	2	2
1	3	2005-02-08	14	2	2	2	4	3	1	1	2	1	2	2	2	2	1	2	#NULL!	2	2	2	2	2	2	2	2	2	2	2	2	2	2	1	#NULL!	1	2	#NULL!	2	2	2	2	2	2	2	2	2	2	2
2	6	2005-09-14	14	2	2	2	0	2	1	2	1	2	2	2	2	2	2	#NULL!	#NULL!	#NULL!	#NULL!	#NULL!	#NULL!	#NULL!	#NULL!	#NULL!	#NULL!	#NULL!	#NULL!	#NULL!	#NULL!	#NULL!	#NULL!	#NULL!	5	1	1	43	2	2	2	2	2	2	2	2	2	2	2
1	1	2006-02-16	13	2	2	2	0	5	1	1	1	1	2	2	2	2	1	1	41	3	2	2	2	2	2	2	2	2	2	2	2	2	2	1	#NULL!	1	1	46	2	2	2	2	2	2	2	2	2	2	2
1	6	2005-09-20	14	2	2	2	0	6	1	1	1	1	2	2	2	2	1	2	#NULL!	2	2	2	2	2	2	2	2	2	2	2	2	2	2	1	#NULL!	1	2	#NULL!	2	2	2	2	2	2	2	2	2	2	2
1	1	2004-10-03	15	2	2	2	1	4	1	1	1	1	2	2	2	2	1	1	43	2	2	2	2	2	2	2	2	2	2	2	2	2	2	1	#NULL!	1	1	42	3	2	2	2	2	2	2	2	2	2	2
2	1	2004-11-20	15	2	2	2	0	3	1	1	2	1	2	2	2	2	1	2	#NULL!	2	2	2	2	2	2	2	2	2	2	2	2	2	1	2	#NULL!	1	1	35	2	2	2	2	2	2	2	2	2	2	2
2	1	2005-05-21	14	2	2	2	1	4	1	1	1	1	2	2	2	2	1	1	39	3	2	2	2	2	2	2	2	2	2	2	2	2	1	2	#NULL!	1	1	41	3	2	2	2	2	2	2	2	2	2	2
2	1	2005-03-15	14	2	2	2	0	2	1	1	2	2	2	2	2	2	1	1	49	2	2	2	2	2	2	2	2	2	2	2	2	2	2	1	#NULL!	1	1	51	2	2	2	2	2	2	2	2	2	2	2
1	1	2004-11-23	15	2	2	2	0	2	1	1	2	2	2	2	2	2	1	2	#NULL!	2	2	2	2	2	2	2	2	2	2	2	2	2	1	2	#NULL!	1	2	#NULL!	2	2	2	2	2	2	2	2	2	2	2
2	3	2006-01-19	13	2	2	2	1	3	1	2	1	1	2	2	2	2	1	1	38	3	2	2	2	2	2	2	2	2	2	2	2	2	2	1	#NULL!	1	1	36	3	2	2	2	2	2	2	2	2	2	2
1	1	2005-10-18	14	2	1	2	0	3	1	1	2	1	2	2	2	2	1	1	50	2	2	2	2	2	2	2	2	2	2	2	2	2	2	1	#NULL!	1	1	49	2	2	2	2	2	2	2	2	2	2	2
2	1	2004-06-24	15	2	2	2	0	4	1	1	1	2	2	2	2	2	1	1	45	2	2	2	2	2	2	2	2	2	2	2	2	2	2	1	#NULL!	1	1	48	4	2	2	2	2	2	2	2	2	2	2
1	1	2004-08-26	15	2	2	2	0	7	2	2	1	2	1	1	1	2	1	1	46	3	2	2	1	2	2	2	2	2	2	2	2	2	2	2	#NULL!	1	1	44	3	2	2	1	2	2	2	2	2	2	2
2	1	2004-03-22	15	2	2	2	0	4	1	1	2	1	2	2	2	2	1	1	48	3	2	2	2	2	2	2	2	2	2	2	2	2	2	1	#NULL!	1	1	49	3	2	2	2	2	2	2	2	2	2	2
2	3	2004-11-23	15	2	2	2	0	4	1	1	2	1	2	2	2	2	1	1	42	3	2	2	2	2	2	2	2	2	2	2	2	2	2	1	#NULL!	1	1	41	3	2	2	2	2	2	2	2	2	2	2
1	1	2004-08-24	15	2	2	2	2	4	2	2	1	2	2	2	1	2	1	2	#NULL!	2	2	2	2	2	2	1	2	2	2	2	2	2	2	2	#NULL!	1	2	#NULL!	3	2	2	2	2	2	2	2	2	2	2
1	1	2004-06-19	15	2	2	2	0	4	1	1	2	1	2	2	2	2	1	1	45	2	2	2	2	2	2	2	2	2	2	2	2	2	2	1	#NULL!	1	1	43	3	2	2	2	2	2	2	2	2	2	2
1	3	2006-04-13	13	2	2	1	1	2	1	1	2	2	2	2	2	2	1	1	40	3	2	2	2	2	2	2	2	2	2	2	2	2	2	1	#NULL!	1	1	39	3	2	2	2	2	2	2	2	2	2	2
2	1	2005-02-27	14	2	2	2	0	3	1	1	2	1	2	2	2	2	1	2	#NULL!	2	2	2	2	2	2	2	2	2	2	2	2	2	2	1	#NULL!	1	2	#NULL!	2	2	2	2	2	2	2	2	2	2	2
2	1	2004-05-23	15	2	2	2	0	3	1	1	2	1	2	2	2	2	1	1	43	4	2	2	2	2	2	2	2	2	2	2	2	2	2	1	#NULL!	1	1	42	4	2	2	2	2	2	2	2	2	2	2
2	3	2004-05-03	15	2	2	2	0	3	1	1	1	2	2	2	2	2	1	1	42	3	2	2	2	2	2	2	2	2	2	2	2	2	2	1	#NULL!	1	1	41	2	2	2	2	2	2	2	2	2	2	2
2	1	2003-05-04	16	2	2	2	0	4	1	1	1	1	2	2	2	2	1	1	40	2	2	2	2	2	2	2	2	2	2	2	2	2	2	1	#NULL!	1	1	34	3	2	2	2	2	2	2	2	2	2	2
2	1	2005-05-15	14	2	2	2	0	3	1	1	2	1	2	2	2	2	1	1	48	2	2	2	2	2	2	2	2	2	2	2	2	2	1	2	#NULL!	1	1	43	1	1	2	2	2	2	2	2	2	2	2
2	1	2005-08-08	14	2	2	2	0	3	1	1	2	1	2	2	2	2	1	1	50	2	2	2	2	2	2	2	2	1	2	2	2	2	2	2	#NULL!	1	1	44	3	2	2	1	2	2	2	2	2	2	2
1	1	2005-08-26	14	2	2	2	0	5	1	1	1	1	2	2	2	2	1	1	39	2	2	2	2	2	2	2	2	2	2	2	2	2	2	1	#NULL!	1	1	38	3	2	2	2	2	2	2	2	2	2	2
2	1	2004-03-07	15	2	2	2	0	3	1	1	2	1	2	2	2	2	1	1	52	3	2	2	2	2	2	2	2	2	2	2	2	2	1	2	#NULL!	1	1	43	3	2	2	2	2	2	2	2	2	2	2
1	1	2006-10-18	13	2	2	2	0	3	1	1	2	1	2	2	2	2	1	2	#NULL!	3	2	2	2	2	2	2	2	2	2	2	2	2	2	1	#NULL!	1	2	#NULL!	1	2	2	2	2	2	2	2	2	2	2
1	1	2004-05-24	15	2	2	2	1	2	1	1	2	2	2	2	2	2	1	2	#NULL!	2	2	2	2	2	2	2	2	2	2	2	2	2	2	1	#NULL!	1	2	#NULL!	1	2	2	2	2	2	2	2	2	2	2
1	1	2005-07-14	14	2	2	2	0	3	1	1	2	1	2	2	2	2	1	1	42	3	2	2	1	2	2	2	2	2	2	2	2	2	2	2	#NULL!	1	1	40	2	2	2	1	2	2	2	2	2	2	2
1	1	2004-10-01	15	2	2	2	1	4	1	1	1	1	2	2	2	2	1	1	42	3	2	2	1	2	2	2	2	2	2	2	2	2	2	2	#NULL!	1	1	43	4	2	2	2	2	2	2	2	2	2	2
1	6	2004-10-26	15	2	2	2	1	5	1	1	1	1	2	2	2	2	1	1	46	3	2	2	2	2	2	2	2	2	2	2	2	2	2	1	#NULL!	1	1	43	2	2	2	1	2	2	2	2	2	2	2
2	1	2004-01-17	15	2	2	2	0	3	1	1	2	1	2	2	2	2	1	1	48	2	2	2	2	2	2	2	2	2	2	2	2	2	2	1	#NULL!	1	1	46	2	2	2	2	2	2	2	2	2	2	2
2	6	2005-11-20	14	2	2	2	0	4	1	1	1	1	2	2	2	2	1	2	#NULL!	0	2	2	2	2	2	2	2	2	2	2	2	2	2	1	#NULL!	1	1	39	3	2	2	2	2	2	2	2	2	2	2
2	1	2005-11-28	14	2	2	2	0	4	1	1	2	1	2	2	2	2	1	1	37	4	2	2	2	2	2	2	2	2	2	2	2	2	2	1	#NULL!	1	1	35	3	2	2	2	2	2	2	2	2	2	2
1	1	2005-03-18	14	2	2	2	0	4	1	1	1	1	2	2	2	2	1	2	#NULL!	2	2	2	2	2	2	2	2	2	2	2	2	2	2	1	#NULL!	1	2	#NULL!	3	2	2	2	2	2	2	2	2	2	2
2	1	2005-05-23	14	2	2	2	0	4	1	1	1	1	1	2	2	2	1	1	37	0	2	2	2	2	2	2	2	2	2	2	2	2	2	1	#NULL!	1	1	35	1	2	2	2	2	2	2	2	2	2	2
1	1	2005-01-17	14	2	2	2	0	4	1	1	1	2	1	2	2	2	1	1	40	3	2	2	2	2	2	2	2	2	2	2	2	2	2	1	#NULL!	1	1	41	3	2	2	2	2	2	2	2	2	2	2
2	1	2003-11-28	16	2	2	2	0	4	1	1	2	1	2	2	2	2	1	1	45	3	2	2	1	2	2	2	2	2	2	2	2	2	2	2	#NULL!	1	1	41	3	2	2	2	2	2	2	2	2	2	2
2	1	2004-04-26	15	2	2	2	0	3	1	1	2	1	2	2	2	2	1	1	48	3	2	2	2	2	2	2	2	2	2	2	2	2	2	1	#NULL!	1	1	46	2	2	2	2	2	2	2	2	2	2	2
1	3	2004-10-19	15	2	2	2	0	3	2	2	1	1	2	2	2	2	1	1	55	3	2	2	2	2	2	2	2	2	2	2	2	2	2	1	#NULL!	1	1	46	4	2	2	2	2	2	2	2	2	2	2
1	1	2007-07-05	12	2	2	2	0	5	1	2	1	1	2	2	2	2	2	#NULL!	#NULL!	#NULL!	#NULL!	#NULL!	#NULL!	#NULL!	#NULL!	#NULL!	#NULL!	#NULL!	#NULL!	#NULL!	#NULL!	#NULL!	#NULL!	#NULL!	13	1	1	36	3	2	2	2	2	2	2	2	2	2	2
2	1	2004-02-12	15	2	2	2	0	3	1	1	2	1	2	2	2	2	1	1	45	3	2	2	2	2	2	2	2	2	2	1	2	2	2	2	#NULL!	1	1	46	2	2	2	2	2	2	2	2	2	2	2
1	1	2004-06-06	15	2	2	2	0	4	1	1	2	1	2	2	2	2	1	2	#NULL!	3	2	2	2	2	2	2	2	2	2	2	2	2	2	1	#NULL!	1	2	#NULL!	3	2	2	2	2	2	2	2	2	2	2
1	1	2004-03-28	15	2	2	2	0	2	2	1	1	2	2	2	2	2	1	1	53	2	2	2	2	2	2	2	2	2	2	2	2	2	2	1	#NULL!	1	1	45	0	2	2	2	2	2	2	2	2	2	2
1	1	2005-12-18	13	2	2	2	0	3	1	1	2	1	2	2	2	2	1	1	41	3	2	2	2	2	2	2	2	2	2	2	2	2	2	1	#NULL!	1	1	35	3	2	2	2	2	2	2	2	2	2	2
2	1	2005-08-05	14	2	2	2	0	5	1	1	2	1	2	2	2	2	1	1	38	3	2	2	2	2	2	2	2	2	2	2	2	2	2	1	#NULL!	1	1	39	2	2	2	2	2	2	2	2	2	2	2
2	1	2005-09-22	14	2	2	2	0	4	1	1	1	1	2	2	2	2	1	2	#NULL!	2	2	2	2	2	2	2	2	2	2	2	2	2	2	1	#NULL!	1	1	39	3	2	2	2	2	2	2	2	2	2	2
2	1	2005-08-13	14	2	2	2	0	5	1	1	1	1	2	2	2	2	1	1	39	3	2	2	2	2	2	2	2	2	2	2	2	2	2	1	#NULL!	1	1	35	3	2	2	2	2	2	2	2	2	2	2
1	1	2004-04-04	15	2	2	2	0	3	1	1	2	1	2	2	2	2	1	1	52	2	2	2	2	2	2	2	2	2	2	2	2	2	2	1	#NULL!	1	1	48	2	2	2	2	2	2	2	2	2	2	2
2	1	2003-05-27	16	2	2	2	0	3	1	1	2	1	2	2	2	2	1	1	47	3	2	2	2	2	2	2	2	2	2	2	2	2	2	1	#NULL!	1	1	39	3	2	2	2	2	2	2	2	2	2	2
2	1	2004-10-28	15	2	2	2	1	7	1	1	2	1	2	2	2	2	1	2	#NULL!	2	2	2	2	2	2	2	2	2	2	2	2	2	2	1	#NULL!	1	1	31	2	2	2	2	2	2	2	2	2	2	2
2	1	2005-10-23	14	2	2	2	0	6	1	1	1	1	2	2	2	2	1	1	45	3	2	2	2	2	2	2	2	2	2	2	2	2	1	2	#NULL!	1	1	38	3	2	2	2	2	2	2	2	2	2	2
1	6	2005-07-17	14	2	2	2	0	3	1	1	2	1	2	2	2	2	1	1	45	3	2	2	2	2	2	2	2	2	2	2	2	2	2	1	#NULL!	1	1	34	3	2	2	2	2	2	2	2	2	2	2
1	1	2005-06-11	14	2	2	2	0	4	1	1	1	1	2	2	2	2	1	1	44	2	2	2	2	2	2	2	2	2	2	2	2	2	2	1	#NULL!	1	1	44	2	2	2	2	2	2	2	2	2	2	2
1	3	2003-03-05	16	2	2	2	0	8	1	1	1	1	1	2	2	2	1	1	47	3	2	2	2	2	2	2	2	2	2	2	2	2	2	1	#NULL!	1	2	#NULL!	0	2	2	2	2	2	2	2	2	2	2
2	1	2004-01-07	15	2	2	2	0	4	2	1	2	2	2	2	1	2	1	1	40	3	2	2	2	2	2	2	2	2	2	2	2	2	2	1	#NULL!	1	1	42	3	2	2	2	2	2	2	2	2	2	2
2	1	2004-08-22	15	2	2	2	0	3	1	1	2	1	2	2	2	2	1	1	53	3	2	2	2	2	2	2	2	2	2	2	2	2	2	1	#NULL!	1	1	48	3	2	2	2	2	2	2	2	2	2	2
1	1	2005-08-27	14	2	2	2	0	6	1	1	1	1	2	2	2	2	1	1	48	3	2	2	2	2	2	2	2	2	2	2	2	2	2	1	#NULL!	1	1	37	2	2	2	2	2	2	2	2	2	2	2
2	1	2006-02-27	13	2	2	2	0	4	1	1	2	1	2	2	2	2	1	1	55	5	2	2	2	2	2	2	2	2	2	2	2	2	2	1	#NULL!	1	1	44	5	2	2	2	2	2	2	2	2	2	2
1	1	2005-08-22	14	2	2	2	0	3	1	2	2	2	2	1	2	2	1	1	46	2	2	2	2	2	2	2	2	2	2	2	2	2	2	1	#NULL!	1	1	45	2	2	2	2	2	2	2	2	2	2	2
1	1	2005-04-22	14	2	2	2	0	3	1	1	2	1	2	2	2	2	1	1	45	3	2	2	2	2	2	2	2	2	2	2	2	2	2	1	#NULL!	1	1	46	3	2	2	2	2	2	2	2	2	2	2
2	3	2004-10-08	15	2	2	1	0	1	1	2	2	2	2	2	2	2	2	#NULL!	#NULL!	#NULL!	#NULL!	#NULL!	#NULL!	#NULL!	#NULL!	#NULL!	#NULL!	#NULL!	#NULL!	#NULL!	#NULL!	#NULL!	#NULL!	#NULL!	14	1	1	43	2	2	2	2	2	2	2	2	2	2	2
1	1	2005-08-20	14	2	2	2	0	2	2	2	1	1	2	2	2	2	1	2	#NULL!	2	2	2	2	2	2	2	2	2	2	2	2	2	2	1	#NULL!	1	1	33	2	2	2	2	2	2	2	2	2	2	2
1	3	2005-04-17	14	2	2	2	1	2	2	2	2	2	2	1	2	2	2	#NULL!	#NULL!	#NULL!	#NULL!	#NULL!	#NULL!	#NULL!	#NULL!	#NULL!	#NULL!	#NULL!	#NULL!	#NULL!	#NULL!	#NULL!	#NULL!	#NULL!	11	1	1	46	1	2	2	2	2	2	2	2	2	2	2
1	1	2005-05-16	14	2	2	2	0	4	1	1	2	1	2	2	2	2	1	2	#NULL!	2	2	2	2	2	2	2	2	2	2	2	2	2	2	1	#NULL!	1	2	#NULL!	2	2	2	2	2	2	2	2	2	2	2
2	1	2005-08-25	14	2	2	2	0	5	1	1	1	1	2	2	2	2	1	2	#NULL!	3	2	2	2	2	2	2	2	2	2	2	2	2	2	1	#NULL!	1	2	#NULL!	2	2	2	2	2	2	2	2	2	2	2
2	1	2004-04-05	15	2	2	2	0	4	1	1	1	1	2	2	2	2	1	1	36	3	2	2	2	2	2	2	2	2	2	1	2	2	2	2	#NULL!	1	1	33	3	2	2	2	2	2	2	2	2	2	2
2	1	2005-03-03	14	2	2	2	0	3	1	2	2	2	1	2	1	2	1	1	44	2	2	2	2	2	2	1	2	2	2	1	2	2	2	2	#NULL!	1	1	44	3	2	2	2	2	2	2	2	2	2	2
1	1	2003-01-24	16	2	2	2	0	3	1	1	2	1	2	2	2	2	1	1	40	2	2	2	2	2	2	2	2	2	2	2	2	2	1	2	#NULL!	1	1	40	2	2	2	2	2	2	2	2	2	2	2
1	1	2004-04-16	15	2	2	2	0	3	1	1	2	1	2	2	2	2	1	1	58	3	2	2	2	2	2	2	2	2	2	2	2	2	1	2	#NULL!	1	1	50	3	2	2	2	2	2	2	2	2	2	1
1	1	2004-02-04	15	2	2	2	0	2	1	1	2	2	2	2	2	2	1	1	38	2	2	2	2	2	2	2	2	2	2	2	2	2	2	1	#NULL!	1	1	39	3	2	2	2	2	2	2	2	2	2	2
1	1	2004-02-10	15	2	2	2	0	3	1	1	2	1	2	2	2	2	1	1	43	2	2	2	2	2	2	2	2	2	2	2	2	2	2	1	#NULL!	1	1	37	2	2	2	2	2	2	2	2	2	2	2
1	1	2005-07-18	14	2	2	2	0	4	2	1	1	1	2	2	2	2	1	2	#NULL!	3	2	2	2	2	2	2	2	2	2	2	2	2	2	1	#NULL!	1	2	#NULL!	3	2	2	2	2	2	2	2	2	2	2
1	1	2003-06-19	16	2	2	2	0	3	1	1	2	1	2	2	2	2	1	2	#NULL!	3	2	2	2	2	2	2	2	2	2	2	2	2	2	1	#NULL!	1	2	#NULL!	3	2	2	2	2	2	2	2	2	2	2
1	1	2004-07-28	15	2	2	2	0	3	1	1	1	2	2	2	2	2	1	1	45	2	2	2	2	2	2	2	2	2	2	2	2	2	2	1	#NULL!	1	1	45	3	2	2	2	2	2	2	2	2	2	2
2	1	2004-11-18	15	2	2	2	0	3	1	1	2	1	2	2	2	2	1	1	43	3	2	2	1	2	2	2	2	2	2	2	2	2	2	2	#NULL!	1	1	36	2	2	2	2	2	2	2	2	2	2	2
2	1	2004-06-05	15	2	2	2	0	4	1	2	1	1	2	2	2	2	2	#NULL!	#NULL!	#NULL!	#NULL!	#NULL!	#NULL!	#NULL!	#NULL!	#NULL!	#NULL!	#NULL!	#NULL!	#NULL!	#NULL!	#NULL!	#NULL!	#NULL!	13	1	1	39	2	2	2	2	2	2	2	2	2	2	2
2	1	2005-06-30	14	2	2	2	0	6	2	1	1	1	2	2	2	2	1	1	45	3	2	2	2	2	2	2	2	2	2	2	2	2	2	1	#NULL!	1	1	40	0	2	2	2	2	2	2	2	2	2	2
1	1	2003-10-23	16	2	2	2	0	4	1	1	1	1	2	2	2	2	1	1	58	2	2	2	2	2	2	2	2	2	2	2	2	2	1	2	#NULL!	1	2	#NULL!	2	2	2	2	2	2	2	2	2	2	2
2	1	2005-10-16	14	2	2	2	0	3	2	2	1	1	2	2	2	2	2	#NULL!	#NULL!	#NULL!	#NULL!	#NULL!	#NULL!	#NULL!	#NULL!	#NULL!	#NULL!	#NULL!	#NULL!	#NULL!	#NULL!	#NULL!	#NULL!	#NULL!	8	1	2	#NULL!	2	2	2	2	2	2	2	2	2	2	2
2	1	2006-02-22	13	2	2	1	0	3	2	2	1	2	2	2	2	1	2	#NULL!	#NULL!	#NULL!	#NULL!	#NULL!	#NULL!	#NULL!	#NULL!	#NULL!	#NULL!	#NULL!	#NULL!	#NULL!	#NULL!	#NULL!	#NULL!	#NULL!	12	1	2	#NULL!	0	2	2	2	2	2	2	2	2	2	2
2	1	2005-08-15	14	2	2	2	1	3	1	1	2	1	2	2	2	2	1	1	32	3	2	2	2	2	2	2	2	2	2	2	2	2	2	1	#NULL!	1	1	30	2	2	2	2	2	2	2	2	2	2	2
2	1	2004-07-02	15	2	2	2	0	3	2	1	2	1	1	2	2	2	1	1	45	2	2	2	2	2	2	2	2	2	2	2	2	2	2	1	#NULL!	1	1	38	3	2	2	2	2	2	2	2	2	2	2
2	1	2004-02-08	15	2	2	2	0	2	1	1	2	2	2	2	2	2	1	1	55	2	2	2	2	2	2	2	2	2	2	2	2	2	2	1	#NULL!	1	1	50	2	2	2	2	2	2	2	2	2	2	2
2	1	2004-07-30	15	2	2	2	0	3	1	1	2	1	2	2	2	2	1	1	45	3	2	2	2	2	1	2	2	2	2	2	2	2	2	2	#NULL!	1	1	36	3	2	2	2	2	2	2	2	2	2	1
2	3	2004-06-24	15	2	2	2	2	4	1	1	2	1	2	2	2	2	1	1	38	2	2	2	2	2	2	2	2	2	2	2	2	2	2	1	#NULL!	1	1	35	2	2	2	2	2	2	2	2	2	2	2
2	1	2004-09-01	15	2	2	1	0	4	2	2	2	2	1	2	1	2	1	1	41	3	2	2	2	2	2	2	2	2	2	2	2	2	2	1	#NULL!	1	1	40	3	2	2	2	2	2	2	2	2	2	2
2	1	2005-12-01	14	2	2	2	0	3	1	1	2	1	2	2	2	2	1	2	#NULL!	2	2	2	2	2	2	2	2	2	2	2	2	2	2	1	#NULL!	1	2	#NULL!	2	2	2	2	2	2	2	2	2	2	2
2	1	2004-08-22	15	2	2	2	0	2	2	1	2	2	2	2	2	2	1	2	#NULL!	2	2	2	2	2	2	2	2	2	2	2	2	2	2	1	#NULL!	2	#NULL!	#NULL!	#NULL!	#NULL!	#NULL!	#NULL!	#NULL!	#NULL!	#NULL!	#NULL!	#NULL!	#NULL!	#NULL!
2	1	2005-09-21	14	2	2	2	0	5	2	1	2	1	2	2	2	2	1	2	#NULL!	2	2	2	2	2	2	2	2	2	2	2	2	2	2	1	#NULL!	1	2	#NULL!	2	2	2	2	2	2	2	2	2	2	2
1	1	2004-09-15	15	2	2	2	0	5	1	1	1	1	2	2	2	2	1	1	42	3	2	2	2	2	2	2	2	2	2	2	2	2	2	1	#NULL!	1	1	39	3	2	2	2	2	2	2	2	2	2	2
1	1	2004-10-18	15	2	2	2	0	4	1	1	2	1	2	2	2	2	1	1	54	3	2	2	2	2	2	2	2	2	2	2	2	2	2	1	#NULL!	1	1	54	3	2	2	2	2	2	2	2	2	2	2
1	1	2004-08-06	15	2	2	2	0	3	1	1	2	1	2	2	2	2	1	1	42	2	2	2	2	2	2	2	2	2	2	2	2	2	2	1	#NULL!	1	1	40	2	2	2	2	2	2	2	2	2	2	2
2	1	2005-01-09	14	2	2	2	0	3	1	1	2	1	2	2	2	2	1	1	51	2	2	2	2	2	2	2	2	2	2	1	2	2	2	2	#NULL!	1	1	43	1	2	2	2	2	2	2	2	2	2	1
2	1	2005-07-01	14	2	2	2	0	3	1	1	2	1	2	2	2	2	1	1	40	3	2	2	2	2	2	2	2	2	2	2	2	2	2	1	#NULL!	1	1	36	2	2	2	2	2	2	2	2	2	2	2
2	5	2006-01-15	13	2	2	2	0	1	2	2	1	2	2	2	2	2	1	1	49	2	2	2	2	2	2	2	2	2	2	2	2	2	2	1	#NULL!	1	1	48	2	2	2	2	2	2	2	2	2	2	2
2	1	2005-10-01	14	2	2	2	0	5	1	1	1	1	2	2	2	2	1	2	#NULL!	0	2	2	2	2	2	2	2	2	2	2	2	2	2	1	#NULL!	1	2	#NULL!	0	2	2	2	2	2	2	2	2	2	2
2	1	2005-11-21	14	2	2	2	0	4	1	2	2	1	2	2	2	2	2	#NULL!	#NULL!	#NULL!	#NULL!	#NULL!	#NULL!	#NULL!	#NULL!	#NULL!	#NULL!	#NULL!	#NULL!	#NULL!	#NULL!	#NULL!	#NULL!	#NULL!	8	1	1	39	2	2	2	2	2	2	2	2	2	2	2
2	1	2005-10-29	14	2	2	2	0	2	1	2	2	1	2	2	2	2	1	2	#NULL!	2	2	2	2	2	2	2	2	2	2	2	2	2	2	1	#NULL!	1	1	47	2	2	2	2	2	2	2	2	2	2	2
2	6	2005-12-21	13	2	2	2	0	4	1	1	2	1	2	2	2	2	1	1	47	2	2	2	2	2	2	2	2	2	2	2	2	2	2	1	#NULL!	1	1	49	3	2	2	2	2	2	2	2	2	2	2
2	1	2005-12-18	13	2	2	2	0	4	1	1	2	1	1	2	2	2	1	1	59	2	2	2	2	2	2	2	2	2	2	2	2	2	2	1	#NULL!	1	1	39	2	2	2	2	2	2	2	2	2	2	2
1	6	2004-02-15	15	2	2	2	0	4	1	1	2	1	1	2	2	2	1	2	#NULL!	3	2	2	2	2	2	2	2	2	2	2	2	2	2	1	#NULL!	1	2	#NULL!	2	2	2	2	2	2	2	2	2	2	2
2	1	2004-08-20	15	2	2	2	0	3	1	1	2	1	2	2	2	2	1	1	42	3	2	2	2	2	2	2	2	2	2	2	2	2	2	1	#NULL!	1	1	38	2	2	2	2	2	2	2	2	2	2	2
2	1	2005-06-06	14	2	2	2	1	3	2	2	1	2	2	2	1	2	1	1	45	2	2	2	2	2	2	2	2	2	2	2	2	2	2	1	#NULL!	1	1	45	3	2	2	2	2	2	2	2	2	2	2
1	1	2004-10-17	15	2	2	2	0	3	1	1	2	1	2	2	2	2	1	2	#NULL!	3	2	2	2	2	2	2	2	2	2	2	2	2	2	1	#NULL!	1	2	#NULL!	3	2	2	2	2	2	2	2	2	2	2
1	1	2004-06-11	15	2	2	2	0	3	1	1	2	1	2	2	2	2	1	1	53	2	2	2	1	2	2	2	2	2	2	2	2	2	2	2	#NULL!	1	1	48	1	2	2	2	2	2	2	2	2	2	2
2	3	2004-10-07	15	2	2	2	1	4	1	1	2	1	2	2	2	2	1	1	57	1	2	2	2	2	2	2	2	2	2	2	2	2	2	1	#NULL!	1	1	39	2	2	2	2	2	2	2	2	2	2	2
2	1	2004-07-11	15	2	2	2	0	1	1	2	2	2	2	2	2	2	1	2	#NULL!	2	2	2	2	2	2	1	2	2	2	2	2	2	2	2	#NULL!	1	1	45	2	2	2	2	2	2	2	2	2	2	2
2	1	2004-09-19	15	2	2	2	0	5	1	1	1	1	2	2	2	2	1	1	40	2	2	2	1	2	2	2	2	2	2	2	2	2	2	2	#NULL!	1	1	39	2	2	2	2	2	2	2	2	2	2	2
2	1	2005-08-22	14	2	2	2	0	5	1	1	2	1	2	2	2	2	1	1	42	2	2	2	2	2	2	2	2	2	2	2	2	2	2	1	#NULL!	1	1	38	2	2	2	2	2	2	2	2	2	2	2
2	1	2005-07-17	14	2	2	2	1	2	1	2	2	1	2	2	2	2	1	1	43	3	2	2	2	2	2	2	2	2	2	2	2	2	2	1	#NULL!	1	1	38	3	2	2	2	2	2	2	2	2	2	2
1	1	2005-08-26	14	2	2	2	0	2	2	2	1	2	2	2	2	2	1	2	#NULL!	3	2	2	2	2	2	2	2	2	2	2	2	2	2	1	#NULL!	1	1	38	4	2	2	2	2	2	2	2	2	2	2
2	1	2006-03-02	13	2	2	2	0	3	1	1	2	1	2	2	2	2	1	2	#NULL!	2	2	2	2	2	2	2	2	2	2	2	2	2	1	2	#NULL!	1	2	#NULL!	3	2	2	2	2	2	2	2	2	2	2
2	1	2004-03-05	15	2	2	2	0	3	2	1	1	1	2	2	2	2	1	1	42	2	2	2	2	2	2	2	2	2	2	2	2	2	2	1	#NULL!	1	1	40	1	2	2	2	2	2	2	2	2	2	2
1	1	2003-08-30	16	2	2	2	0	1	2	1	2	2	2	2	2	2	1	1	50	2	2	2	2	2	2	2	2	2	2	2	2	2	2	1	#NULL!	1	1	53	2	2	2	2	2	2	2	2	2	2	2
2	1	2003-05-22	16	2	2	2	0	4	1	1	2	1	2	2	2	2	1	1	50	3	2	2	2	2	2	2	2	2	2	2	2	2	2	1	#NULL!	1	1	40	1	2	2	2	2	2	2	2	2	2	2
1	1	2005-12-15	13	2	1	1	0	3	1	2	2	2	2	2	2	2	1	2	#NULL!	3	2	2	2	2	2	2	2	2	2	2	2	2	2	1	#NULL!	1	2	#NULL!	4	2	2	2	2	2	2	2	2	2	2
2	1	2006-09-09	13	2	2	2	0	2	2	2	1	2	2	2	2	2	2	#NULL!	#NULL!	#NULL!	#NULL!	#NULL!	#NULL!	#NULL!	#NULL!	#NULL!	#NULL!	#NULL!	#NULL!	#NULL!	#NULL!	#NULL!	#NULL!	#NULL!	6	1	1	40	3	2	2	2	2	2	2	2	2	2	2
1	1	2004-03-16	15	2	2	2	0	6	1	1	1	1	2	2	2	2	1	2	#NULL!	2	2	2	2	2	2	2	2	2	2	2	2	2	2	1	#NULL!	1	2	#NULL!	2	2	2	2	2	2	2	2	2	2	2
2	1	2003-11-11	16	2	2	2	0	4	2	2	1	1	2	2	2	2	1	2	#NULL!	2	2	2	1	2	2	2	2	2	2	2	2	2	2	2	#NULL!	1	2	#NULL!	2	2	2	2	2	2	2	2	2	2	2
2	1	2006-06-08	13	2	2	2	0	3	1	1	2	1	2	2	2	2	1	1	44	3	2	2	2	2	2	2	2	2	2	2	2	2	2	1	#NULL!	1	1	52	2	2	2	2	2	2	2	2	2	2	2
1	1	2006-12-25	12	2	2	2	0	5	1	1	1	1	2	2	2	2	1	1	38	3	2	2	2	2	2	2	2	2	2	2	2	2	2	1	#NULL!	1	1	32	3	2	2	2	2	2	2	2	2	2	2
1	4	2005-01-08	14	2	2	2	0	2	1	1	2	2	2	2	2	2	1	2	#NULL!	3	2	2	2	2	2	2	2	2	2	2	2	2	2	1	#NULL!	1	2	#NULL!	2	2	2	2	2	2	2	2	2	2	2
1	1	2003-10-05	16	2	2	2	0	4	1	1	2	2	1	2	2	2	1	1	54	3	2	2	2	2	2	2	2	2	2	2	2	2	1	2	#NULL!	1	1	45	2	2	2	2	2	2	2	2	2	2	2
2	1	2006-01-23	13	2	2	2	0	2	2	1	2	1	2	2	2	2	1	2	#NULL!	2	2	2	2	2	2	2	2	2	2	2	2	2	2	1	#NULL!	1	1	30	1	2	2	2	2	2	2	2	2	2	2
1	1	2004-08-14	15	2	2	2	0	3	1	1	2	1	2	2	2	2	1	1	41	3	2	2	1	2	2	2	2	2	2	2	2	2	2	2	#NULL!	1	1	40	2	2	2	1	2	2	2	2	2	2	2
1	1	2004-10-11	15	2	2	2	1	6	1	1	1	1	2	2	1	2	1	1	38	4	2	2	2	2	2	2	2	2	2	2	2	2	2	1	#NULL!	1	1	38	3	2	2	2	2	2	2	2	2	2	1
2	1	2004-12-15	14	2	2	2	0	4	1	1	2	1	2	2	2	2	1	1	40	3	2	2	2	2	2	2	2	2	2	2	2	2	2	1	#NULL!	1	1	31	2	2	2	2	2	2	2	2	2	2	2
1	1	2004-12-24	14	2	2	2	0	3	1	1	2	1	2	2	2	2	1	1	44	3	2	2	2	2	2	2	2	2	2	2	2	2	2	1	#NULL!	1	1	40	2	2	2	2	2	2	2	2	2	2	2
2	1	2004-12-21	14	2	2	2	0	3	1	1	2	1	2	2	2	2	1	2	#NULL!	2	2	2	2	2	2	2	2	2	2	2	2	2	2	1	#NULL!	1	2	#NULL!	2	2	2	2	2	2	2	2	2	2	2
2	1	2004-01-08	15	2	2	2	0	5	1	1	1	1	2	2	2	2	1	1	47	2	2	2	2	2	2	2	2	2	2	2	2	2	2	1	#NULL!	1	1	39	2	2	2	2	2	2	2	2	2	2	2
1	1	2004-03-13	15	2	2	2	0	4	1	1	2	1	1	2	2	2	1	1	43	3	2	2	2	2	2	2	2	2	2	2	2	2	2	1	#NULL!	1	1	44	3	2	2	2	2	2	2	2	2	2	2
2	1	2004-06-25	15	2	2	2	0	3	1	1	2	1	2	2	2	2	1	1	49	3	1	2	2	2	2	2	2	2	2	2	2	2	2	2	#NULL!	1	1	39	2	2	2	2	2	2	2	2	2	2	2
2	6	2003-04-04	16	2	2	2	0	4	1	1	1	1	2	2	2	2	1	1	48	2	2	2	2	2	2	2	2	2	2	2	2	2	2	1	#NULL!	1	1	45	4	2	2	1	2	2	2	2	2	2	2
2	1	2004-12-21	14	2	2	2	0	5	1	1	1	1	2	2	2	2	1	1	38	3	2	2	2	2	2	2	2	2	2	2	2	2	2	1	#NULL!	1	1	40	2	2	2	2	2	2	2	2	2	2	2
1	1	2005-01-01	14	2	2	2	0	6	1	1	1	1	2	2	2	2	1	1	45	3	2	2	2	2	2	2	2	2	2	2	2	2	2	1	#NULL!	1	1	43	2	2	2	2	2	2	2	2	2	2	2
1	6	2005-02-12	14	2	2	2	0	4	1	1	2	2	2	2	2	2	1	1	52	2	2	2	2	2	2	2	2	2	2	2	2	2	2	1	#NULL!	1	1	49	2	2	2	2	2	2	2	2	2	2	2
2	1	2004-09-19	15	2	2	2	0	4	1	1	2	1	2	2	2	2	1	1	37	2	2	2	2	2	2	2	2	2	2	2	2	2	2	1	#NULL!	1	1	36	3	2	2	2	2	2	2	2	2	2	2
2	1	2004-06-18	15	2	2	2	3	3	1	1	2	1	2	2	2	2	1	2	#NULL!	2	2	2	2	2	2	2	2	2	2	2	2	2	2	1	#NULL!	1	2	#NULL!	2	2	2	1	2	2	2	2	2	2	2
2	1	2004-05-28	15	2	2	2	0	4	1	1	1	1	2	2	2	2	1	1	45	2	2	2	2	2	2	2	2	2	2	1	2	2	2	2	#NULL!	1	1	41	1	2	2	2	2	2	2	2	2	2	1
1	1	2004-09-10	15	2	2	2	0	6	1	1	2	1	1	2	2	2	1	1	35	2	2	2	2	2	2	2	2	2	2	2	2	2	2	1	#NULL!	1	1	34	2	2	2	2	2	2	2	2	2	2	2
1	1	2005-04-16	14	2	2	2	0	3	1	1	2	2	2	2	2	2	1	2	#NULL!	2	2	2	2	2	2	2	2	2	2	2	2	2	1	2	#NULL!	1	2	#NULL!	2	2	2	2	2	2	2	2	2	2	2
1	1	2006-04-29	13	2	2	2	0	5	1	1	1	1	2	2	2	2	1	1	52	2	2	2	2	2	2	2	2	2	2	2	2	2	2	1	#NULL!	1	2	#NULL!	0	2	2	2	2	2	2	2	2	2	2
1	1	2005-09-15	14	2	1	2	0	2	2	1	2	2	2	2	2	2	1	1	50	3	2	2	1	2	2	2	2	2	2	2	2	2	2	2	#NULL!	1	1	45	2	2	2	2	2	2	2	2	2	2	2
1	1	2006-02-15	13	2	1	2	0	4	1	1	2	1	2	2	2	2	1	1	45	3	2	2	2	2	2	2	2	2	2	2	2	2	2	1	#NULL!	1	1	43	2	2	2	2	2	2	2	2	2	2	2
2	1	2005-09-17	14	2	2	2	0	4	1	1	2	1	2	2	2	2	1	1	38	3	2	2	2	2	2	2	2	2	2	2	2	2	2	1	#NULL!	1	1	39	3	2	2	2	2	2	2	2	2	2	2
1	1	2005-12-31	13	2	2	2	0	2	1	1	2	2	2	2	2	2	1	2	#NULL!	2	2	2	2	2	2	1	2	2	2	2	2	2	2	2	#NULL!	1	1	45	0	2	2	2	2	2	2	2	2	2	2
2	1	2006-01-31	13	2	2	2	0	6	1	1	1	1	2	2	2	2	1	1	39	2	2	2	2	2	2	2	2	2	2	2	2	2	2	1	#NULL!	1	1	40	2	2	2	2	2	2	2	2	2	2	2
2	1	2006-03-06	13	2	2	2	0	6	1	1	1	2	2	2	2	2	1	1	41	2	2	2	2	2	2	2	2	2	2	2	2	2	2	1	#NULL!	1	1	39	2	2	2	2	2	2	2	2	2	2	2
1	1	2005-10-16	14	2	2	2	0	3	1	2	1	1	2	2	2	2	1	1	46	3	2	2	2	2	2	2	2	2	2	2	2	2	2	1	#NULL!	1	1	36	3	2	2	2	2	2	2	2	2	2	2
2	1	2006-04-06	13	2	2	2	0	5	1	1	1	1	2	2	2	2	1	1	38	3	2	2	2	2	2	2	2	2	2	2	2	2	2	1	#NULL!	1	1	32	2	2	2	2	2	2	2	2	2	2	2
2	6	2007-01-08	12	2	2	2	2	2	2	2	1	2	2	2	2	2	1	1	36	2	2	2	2	2	2	2	2	2	2	2	2	2	2	1	#NULL!	1	1	35	3	2	2	2	2	2	2	2	2	2	2
2	1	2006-02-14	13	2	2	2	0	3	1	1	2	1	2	2	2	2	1	1	38	2	2	2	2	2	2	2	2	2	2	2	2	2	2	1	#NULL!	1	1	35	2	2	2	2	2	2	2	2	2	2	2
1	1	2005-07-19	14	2	2	1	0	2	1	1	2	2	2	2	2	2	1	2	#NULL!	3	2	2	2	2	2	2	2	2	2	2	2	2	2	1	#NULL!	1	2	#NULL!	2	2	2	2	2	2	2	2	2	2	2
2	1	2005-04-13	14	2	2	2	0	7	1	1	1	1	2	2	2	2	1	2	#NULL!	2	2	2	2	2	2	2	2	2	2	2	2	2	2	1	#NULL!	1	2	#NULL!	2	2	2	2	2	2	2	2	2	2	2
1	1	2005-03-08	14	2	2	2	0	4	2	1	1	1	2	2	2	2	1	1	44	2	2	2	2	2	2	2	2	2	2	2	2	2	2	1	#NULL!	2	#NULL!	#NULL!	#NULL!	#NULL!	#NULL!	#NULL!	#NULL!	#NULL!	#NULL!	#NULL!	#NULL!	#NULL!	#NULL!
2	1	2006-09-20	13	2	2	2	1	5	1	2	1	1	2	2	2	2	1	1	46	2	2	2	2	2	2	2	2	2	2	1	2	2	2	2	#NULL!	1	1	41	2	2	2	2	1	2	2	2	2	2	1
2	1	2005-12-18	13	2	2	2	0	6	1	1	1	1	2	2	2	2	1	1	42	3	2	2	2	2	2	2	2	2	2	2	2	2	2	1	#NULL!	1	1	38	2	2	2	2	2	2	2	2	2	2	2
1	1	2006-02-28	13	2	2	2	0	4	1	1	2	1	2	2	2	2	1	1	45	2	2	2	2	2	2	2	2	2	2	2	2	2	2	1	#NULL!	1	1	46	3	2	2	2	2	2	2	2	2	2	1
2	1	2005-07-17	14	2	2	2	0	6	1	1	1	1	2	2	2	2	1	2	#NULL!	3	2	2	2	2	2	2	2	2	2	2	2	2	2	1	#NULL!	1	2	#NULL!	2	2	2	2	2	2	2	2	2	2	2
2	1	2004-08-30	15	2	2	2	0	2	2	1	2	1	2	2	2	2	1	1	50	2	2	2	2	2	2	2	2	2	2	2	2	2	2	1	#NULL!	1	1	45	2	2	2	2	2	2	2	2	2	2	2
1	1	2004-08-22	15	2	2	2	0	9	1	1	2	2	2	1	2	2	1	1	42	3	2	2	2	2	2	2	2	2	2	2	2	2	2	1	#NULL!	1	1	40	3	2	2	2	2	2	2	2	2	2	2
1	1	2004-03-26	15	2	2	2	0	5	1	1	2	1	2	2	2	2	1	1	46	3	2	2	2	2	2	2	2	2	2	2	2	2	2	1	#NULL!	1	1	36	4	2	2	2	2	2	2	2	2	2	2
1	6	2004-07-15	15	2	2	2	0	4	1	1	2	1	2	2	2	2	1	1	42	1	2	2	2	2	2	2	2	2	2	2	2	2	2	1	#NULL!	1	1	43	2	2	2	2	2	2	2	2	2	2	2
1	1	2004-11-30	15	2	1	2	0	1	1	2	2	2	2	2	2	2	2	#NULL!	#NULL!	#NULL!	#NULL!	#NULL!	#NULL!	#NULL!	#NULL!	#NULL!	#NULL!	#NULL!	#NULL!	#NULL!	#NULL!	#NULL!	#NULL!	#NULL!	1	1	1	43	1	2	2	2	2	2	2	2	2	2	1
2	1	2005-01-01	14	2	2	2	0	2	2	1	2	1	2	2	2	2	1	1	52	2	2	2	2	2	2	2	2	2	2	2	2	2	2	1	#NULL!	1	2	#NULL!	0	2	2	2	2	2	2	2	2	2	2
1	1	2004-11-04	15	2	2	2	0	6	1	1	1	1	2	2	2	2	1	2	#NULL!	2	2	2	2	2	2	2	2	2	2	2	2	2	2	1	#NULL!	1	2	#NULL!	3	2	2	2	2	2	2	2	2	2	2
2	1	2004-03-09	15	2	2	2	0	3	1	1	2	1	2	2	2	2	1	1	52	2	2	2	1	2	2	2	2	2	2	2	2	2	2	2	#NULL!	1	1	48	2	2	2	1	2	2	2	2	2	2	2
1	1	2004-10-29	15	2	2	2	0	3	1	1	1	2	2	2	2	2	1	1	32	3	2	2	2	2	2	2	2	2	2	2	2	2	2	1	#NULL!	1	1	33	2	2	2	2	2	2	2	2	2	2	2
2	1	2004-02-06	15	2	2	2	0	1	2	1	2	2	2	2	2	2	1	1	55	2	2	2	1	2	2	2	2	2	2	2	2	2	2	2	#NULL!	2	#NULL!	#NULL!	#NULL!	#NULL!	#NULL!	#NULL!	#NULL!	#NULL!	#NULL!	#NULL!	#NULL!	#NULL!	#NULL!
2	1	2004-10-18	15	2	2	2	0	2	1	2	2	1	2	2	2	2	2	#NULL!	#NULL!	#NULL!	#NULL!	#NULL!	#NULL!	#NULL!	#NULL!	#NULL!	#NULL!	#NULL!	#NULL!	#NULL!	#NULL!	#NULL!	#NULL!	#NULL!	10	1	1	45	2	2	2	2	2	2	2	2	2	2	2
2	1	2004-02-19	15	2	2	2	0	4	1	1	2	1	2	2	2	2	1	1	42	2	2	2	2	2	2	2	2	2	2	2	2	2	2	1	#NULL!	1	1	40	2	2	2	2	2	2	2	2	2	2	2
1	1	2004-11-01	15	2	2	2	0	3	1	1	2	1	2	2	2	2	1	2	#NULL!	2	2	2	2	2	2	2	2	2	2	2	2	2	2	1	#NULL!	1	2	#NULL!	0	2	2	2	2	2	2	2	2	2	2
1	6	2004-08-21	15	2	2	2	0	4	1	1	1	1	2	2	2	2	1	1	48	2	2	2	2	2	2	2	2	2	2	2	2	2	2	1	#NULL!	1	1	47	4	2	2	2	2	2	2	2	2	2	2
2	1	2004-12-16	14	2	2	2	0	2	1	1	2	2	2	2	2	2	1	1	38	3	2	2	2	2	2	2	2	2	2	2	2	2	2	1	#NULL!	1	1	46	2	2	2	2	2	2	2	2	2	2	2
1	6	2004-07-13	15	2	2	2	0	3	1	1	2	1	2	2	2	2	1	2	#NULL!	1	2	2	2	2	2	2	2	2	2	2	2	2	2	1	#NULL!	1	2	#NULL!	2	2	2	2	2	2	2	2	2	2	2
2	6	2004-08-17	15	2	2	2	0	3	1	1	2	1	1	2	2	2	1	1	45	2	2	2	2	2	2	2	2	2	2	2	2	2	2	1	#NULL!	1	1	44	2	2	2	2	2	2	2	2	2	2	2
1	1	2004-05-07	15	2	2	2	0	5	1	1	1	1	2	2	2	2	1	1	42	3	2	2	2	2	2	2	2	2	2	2	2	2	2	1	#NULL!	1	1	36	2	2	2	2	2	2	2	2	2	2	2
2	1	2004-09-02	15	2	2	2	0	3	1	1	2	1	2	2	2	2	1	2	#NULL!	2	2	2	2	2	2	2	2	2	2	2	2	2	2	1	#NULL!	1	2	#NULL!	1	2	2	2	2	2	2	2	2	2	2
1	1	2004-10-06	15	2	2	2	0	2	2	1	2	2	2	2	2	2	1	2	#NULL!	3	2	2	2	2	2	2	2	2	2	2	2	2	2	1	#NULL!	1	2	#NULL!	3	2	2	2	2	2	2	2	2	2	2
2	1	2004-12-22	14	2	2	2	0	4	1	1	1	1	2	2	2	2	1	1	42	2	2	2	2	2	2	2	2	2	2	2	2	2	2	1	#NULL!	1	1	38	2	2	2	2	2	2	2	2	2	2	2
1	1	2004-09-14	15	2	1	1	0	3	2	2	1	2	1	2	2	2	1	1	38	2	2	2	2	2	2	2	2	2	2	2	2	2	2	1	#NULL!	1	1	39	3	2	2	2	2	2	2	2	2	2	2
2	1	2003-12-08	15	2	2	2	0	4	2	2	2	2	2	2	1	2	1	1	42	4	2	2	2	2	2	2	2	2	2	2	2	2	2	1	#NULL!	1	1	41	2	2	2	2	2	2	2	2	2	2	2
1	1	2004-08-27	15	2	2	2	0	3	1	1	2	1	2	2	2	2	1	2	#NULL!	2	2	2	2	2	2	2	2	2	2	2	2	2	2	1	#NULL!	1	2	#NULL!	2	2	2	2	2	2	2	2	2	2	2
1	1	2004-02-08	15	2	2	2	0	4	2	2	2	1	1	2	1	2	1	2	#NULL!	3	2	2	2	2	2	2	2	2	2	2	2	2	2	1	#NULL!	1	2	#NULL!	3	2	2	2	2	2	2	2	2	2	2
1	1	2003-12-31	15	2	2	2	4	3	2	2	2	2	2	2	2	1	1	2	#NULL!	3	2	2	2	2	2	2	2	2	2	2	2	2	2	1	#NULL!	1	2	#NULL!	4	2	2	2	2	2	2	2	2	2	2
2	1	2004-11-15	15	2	2	2	0	4	1	1	2	1	2	2	2	2	1	2	#NULL!	3	2	2	2	2	2	2	2	2	2	2	2	2	2	1	#NULL!	1	2	#NULL!	2	2	2	2	2	2	2	2	2	2	2
1	1	2004-11-20	15	2	2	2	0	3	1	1	2	1	2	2	2	2	1	2	#NULL!	3	2	2	2	2	2	2	2	2	2	2	2	2	2	1	#NULL!	1	2	#NULL!	3	2	2	2	2	2	2	2	2	2	2
2	1	2004-03-04	15	2	2	2	0	4	1	1	2	1	2	2	2	2	1	1	50	3	2	2	2	2	2	2	2	2	2	2	2	2	2	1	#NULL!	1	1	51	3	2	2	2	2	2	2	2	2	2	2
1	1	2004-05-05	15	2	2	2	0	2	1	1	2	2	2	2	2	2	1	1	56	3	2	2	2	2	2	2	2	2	2	2	2	2	2	1	#NULL!	1	1	48	2	2	2	1	2	2	2	2	2	2	2
1	1	2004-07-11	15	2	1	2	0	3	1	1	2	1	2	2	2	2	1	2	#NULL!	3	2	2	2	2	2	2	2	2	2	2	2	2	2	1	#NULL!	1	2	#NULL!	2	2	2	2	2	2	2	2	2	2	2
2	1	2006-12-01	13	2	2	2	0	3	2	2	1	1	2	2	2	2	1	2	#NULL!	3	2	2	2	2	2	2	2	2	2	2	2	2	2	1	#NULL!	1	2	#NULL!	2	2	2	2	2	2	2	2	2	2	2
2	1	2007-03-03	12	2	2	2	0	2	2	2	1	2	2	2	2	2	1	1	43	3	2	2	2	2	2	2	2	2	2	2	2	2	2	1	#NULL!	1	1	37	2	2	2	2	2	2	2	2	2	2	2
2	1	2007-02-18	12	2	2	2	0	5	1	1	1	1	2	2	2	2	1	1	40	2	1	2	2	2	2	2	2	2	2	2	2	2	2	2	#NULL!	1	2	#NULL!	3	2	2	2	2	2	2	2	2	2	2
2	1	2006-10-16	13	2	2	2	0	3	1	1	2	1	2	2	2	2	1	1	37	3	2	2	2	2	2	2	2	2	2	2	2	2	2	1	#NULL!	1	1	35	2	2	2	2	2	2	2	2	2	2	2
2	1	2007-03-14	12	2	2	1	0	3	2	2	1	2	1	2	2	2	1	2	#NULL!	0	2	2	2	2	2	2	2	2	2	2	2	2	2	1	#NULL!	1	2	#NULL!	0	2	2	2	2	2	2	2	2	2	2
2	1	2006-07-11	13	2	2	2	2	5	1	1	1	1	2	2	2	2	1	1	43	3	2	2	2	2	2	2	2	2	2	2	2	2	2	1	#NULL!	1	1	31	2	2	2	2	2	2	2	2	2	2	2
1	1	2005-05-24	14	2	2	2	0	3	1	1	2	1	2	2	2	2	1	1	36	2	2	2	2	2	2	2	2	2	2	2	2	2	2	1	#NULL!	1	1	33	0	2	2	2	2	2	2	2	2	2	2
1	1	2005-12-07	13	2	2	2	0	2	1	1	2	2	2	2	2	2	1	1	46	2	2	2	2	2	2	2	2	2	2	2	2	2	2	1	#NULL!	1	1	43	2	2	2	2	2	2	2	2	2	2	2
1	1	2009-12-06	10	2	2	2	0	3	1	1	2	1	2	2	2	2	2	#NULL!	#NULL!	#NULL!	#NULL!	#NULL!	#NULL!	#NULL!	#NULL!	#NULL!	#NULL!	#NULL!	#NULL!	#NULL!	#NULL!	#NULL!	#NULL!	#NULL!	12	1	2	#NULL!	2	2	2	2	2	2	2	2	2	2	2
1	1	2005-12-22	13	2	1	2	0	2	1	1	2	2	2	2	2	2	1	1	45	2	2	2	2	2	2	2	2	2	2	2	2	2	2	1	#NULL!	1	1	45	3	2	2	2	2	2	2	2	2	2	2
1	1	2005-11-03	14	2	1	2	0	4	1	1	2	1	2	2	2	2	1	1	45	2	2	2	1	2	2	2	2	2	2	2	2	2	2	2	#NULL!	1	1	39	1	2	2	2	2	2	2	2	2	2	2
1	1	2005-12-30	13	2	2	2	0	5	1	1	1	1	2	2	2	2	1	1	47	2	2	2	2	2	2	2	2	2	2	2	2	2	2	1	#NULL!	1	1	45	2	2	2	2	2	2	2	2	2	2	2
2	1	2005-08-11	14	2	2	2	0	5	1	1	1	1	2	2	2	2	1	1	38	2	2	2	2	2	2	2	2	2	2	2	2	2	2	1	#NULL!	1	1	43	3	2	2	2	2	2	2	2	2	2	2
2	6	2005-07-08	14	2	2	2	0	4	1	1	2	1	2	2	2	2	1	2	#NULL!	1	2	2	2	2	2	2	2	2	2	2	2	2	2	1	#NULL!	1	2	#NULL!	2	2	2	2	2	2	2	2	2	2	2
1	1	2005-10-11	14	2	2	1	2	2	2	2	1	2	2	2	2	2	1	1	40	4	2	2	2	2	2	2	2	2	2	2	2	2	2	1	#NULL!	1	1	40	2	2	2	2	2	2	2	2	2	2	2
1	1	2005-12-24	13	2	2	2	0	4	1	1	2	1	2	2	2	2	1	2	#NULL!	3	2	2	2	2	2	2	2	2	2	2	2	2	2	1	#NULL!	1	2	#NULL!	3	2	2	2	2	2	2	2	2	2	2
2	1	2005-10-18	14	2	2	2	0	3	1	1	2	1	2	2	2	2	1	1	53	3	2	2	2	2	2	2	2	2	2	2	2	2	2	1	#NULL!	1	1	38	2	2	2	2	2	2	2	2	2	2	2
2	1	2005-11-08	14	2	2	2	1	4	1	1	1	2	2	2	2	2	1	2	#NULL!	3	2	2	2	2	2	2	2	2	2	2	2	2	2	1	#NULL!	1	2	#NULL!	3	2	2	2	2	2	2	2	2	2	2
1	1	2005-07-01	14	2	2	2	0	2	1	1	2	2	2	2	2	2	1	1	46	3	2	2	2	2	2	2	2	2	2	2	2	2	2	1	#NULL!	1	1	36	2	2	2	2	2	2	2	2	2	2	1
2	1	2006-02-13	13	2	2	2	0	4	1	1	2	1	2	2	2	2	1	2	#NULL!	2	2	2	1	2	2	2	2	2	2	2	2	2	2	2	#NULL!	1	2	#NULL!	0	2	2	1	2	2	2	2	2	2	2
2	1	2007-03-31	12	2	2	2	0	2	2	2	1	2	2	2	2	2	1	1	47	3	2	2	2	2	2	2	2	2	2	2	2	2	2	1	#NULL!	1	2	#NULL!	3	2	2	2	2	2	2	2	2	2	2
2	1	2005-07-10	14	2	2	2	0	4	2	1	1	2	1	2	2	2	1	1	45	1	2	2	2	2	2	2	2	2	2	2	2	2	2	1	#NULL!	2	#NULL!	#NULL!	#NULL!	#NULL!	#NULL!	#NULL!	#NULL!	#NULL!	#NULL!	#NULL!	#NULL!	#NULL!	#NULL!
2	1	2006-10-24	13	2	2	2	0	4	1	1	1	1	2	2	2	2	1	1	40	3	2	2	2	2	2	2	2	2	2	2	2	2	2	1	#NULL!	1	1	35	2	2	2	2	2	2	2	2	2	2	2
2	1	2005-06-25	14	2	2	2	0	3	1	1	2	1	2	2	2	2	1	1	43	2	2	2	2	2	2	2	2	2	2	2	2	2	2	1	#NULL!	1	1	42	2	2	2	2	2	2	2	2	2	2	2
1	1	2005-08-17	14	2	2	2	0	4	1	1	1	1	2	2	2	2	1	1	43	2	2	2	2	2	2	2	2	2	2	2	2	2	2	1	#NULL!	1	1	39	2	2	2	2	2	2	2	2	2	2	2
2	1	2004-08-19	15	2	2	2	0	7	1	1	1	1	1	1	2	2	1	1	39	2	2	2	2	2	2	2	2	2	2	2	2	2	2	1	#NULL!	1	1	37	2	2	2	2	2	2	2	2	2	2	2
1	1	2005-10-27	14	2	2	2	0	4	1	1	2	2	1	2	2	2	1	1	41	2	2	2	2	2	2	2	2	2	2	2	2	2	2	1	#NULL!	1	1	40	2	2	2	2	2	2	2	2	2	2	2
1	1	2006-03-20	13	2	1	2	0	3	1	1	2	1	2	2	2	2	1	1	40	3	2	2	2	2	2	2	2	2	2	2	2	2	2	1	#NULL!	1	1	41	3	2	2	2	2	2	2	2	2	2	2
1	1	2005-05-25	14	2	2	2	0	5	1	2	1	1	1	2	2	2	1	2	#NULL!	3	2	2	2	2	2	2	2	2	2	2	2	2	2	1	#NULL!	1	1	42	2	2	2	2	2	2	2	2	2	2	2
1	1	2005-07-14	14	2	2	2	0	2	1	1	2	2	2	2	2	2	1	1	40	3	2	2	2	2	2	2	2	2	2	2	2	2	2	1	#NULL!	1	1	36	2	2	2	2	2	2	2	2	2	2	2
1	1	2005-06-09	14	2	2	2	0	2	1	1	2	2	2	2	2	2	1	1	51	3	2	2	2	2	2	2	2	2	2	2	2	2	2	1	#NULL!	1	1	42	2	2	2	2	2	2	2	2	2	2	2
1	1	2006-04-02	13	2	2	2	0	5	1	1	1	1	2	2	2	2	1	1	40	4	2	2	2	2	2	2	2	2	2	2	2	2	2	1	#NULL!	1	1	36	2	2	2	2	2	2	2	2	2	2	2
2	1	2006-11-06	13	2	2	2	0	2	2	2	1	2	2	2	2	2	1	1	40	3	2	2	2	2	2	2	2	2	2	2	2	2	1	2	#NULL!	1	1	38	2	2	2	2	2	2	2	2	2	2	2
1	1	2005-02-25	14	2	2	2	0	4	1	1	2	1	2	2	2	2	1	1	45	0	2	2	2	2	2	2	2	2	2	2	2	2	2	1	#NULL!	1	2	#NULL!	3	2	2	2	2	2	2	2	2	2	2
2	1	2005-01-02	14	2	2	2	0	3	1	2	2	1	2	2	2	1	1	2	#NULL!	0	2	2	2	2	2	2	2	2	2	2	2	2	2	1	#NULL!	1	1	45	2	2	2	2	2	2	2	2	2	2	2
1	6	2004-12-01	15	2	2	1	0	1	1	2	2	2	2	2	2	2	2	#NULL!	#NULL!	#NULL!	#NULL!	#NULL!	#NULL!	#NULL!	#NULL!	#NULL!	#NULL!	#NULL!	#NULL!	#NULL!	#NULL!	#NULL!	#NULL!	#NULL!	3	1	1	41	2	2	2	2	2	2	2	2	2	2	2
1	1	2005-05-15	14	2	2	2	0	3	1	1	2	1	2	2	2	2	1	1	37	3	2	2	2	2	2	2	2	2	2	2	2	2	2	1	#NULL!	1	1	35	3	2	2	2	2	2	2	2	2	2	2
2	1	2005-06-17	14	2	2	2	1	3	1	1	2	1	2	2	2	2	1	1	44	3	2	2	2	2	2	2	2	2	2	2	2	2	2	1	#NULL!	1	1	37	2	2	2	2	2	2	2	2	2	2	2
1	1	2006-03-01	13	2	2	2	0	3	1	1	2	1	2	2	2	2	1	1	39	2	2	2	2	2	2	2	2	2	2	2	2	2	2	1	#NULL!	1	1	37	3	2	2	2	2	2	2	2	2	2	2
2	1	2005-02-16	14	2	2	2	0	6	1	1	1	1	1	2	2	2	1	1	34	2	2	2	2	2	2	2	2	2	2	2	2	2	2	1	#NULL!	1	1	32	3	2	2	2	2	2	2	2	2	2	2
2	1	2005-05-04	14	2	2	2	0	4	1	1	2	1	2	2	2	2	1	2	#NULL!	3	2	2	2	2	2	2	2	2	2	2	2	2	2	1	#NULL!	1	2	#NULL!	3	2	2	2	2	2	2	2	2	2	2
2	1	2006-01-21	13	2	2	2	0	4	1	1	1	1	2	2	2	2	1	1	42	3	2	2	2	2	2	2	2	2	2	2	2	2	2	1	#NULL!	1	1	38	1	2	2	2	2	2	2	2	2	2	1
1	1	2005-01-01	14	2	2	2	1	2	1	1	2	2	2	2	2	2	1	2	#NULL!	3	2	2	1	2	2	2	2	2	2	2	2	2	2	2	#NULL!	1	2	#NULL!	3	2	2	2	2	2	2	2	2	2	2
2	6	2004-01-04	15	2	2	2	0	2	1	1	2	2	2	2	2	2	1	1	42	3	2	2	2	2	2	2	2	2	2	2	2	2	2	1	#NULL!	1	1	38	3	2	2	1	2	2	2	2	2	2	2
1	1	2004-01-07	15	2	2	2	1	4	1	1	2	1	2	2	2	2	1	1	54	2	2	2	2	2	2	2	2	2	2	2	2	2	2	1	#NULL!	1	1	53	3	2	2	2	2	2	2	2	2	2	2
1	1	2004-07-27	15	2	2	2	0	8	2	2	1	1	1	1	2	2	1	1	33	3	2	2	2	2	2	2	2	2	2	2	2	2	2	1	#NULL!	1	1	33	3	2	2	2	2	2	2	2	2	2	2
2	1	2004-09-20	15	2	2	2	0	4	1	1	1	1	2	2	2	2	1	2	#NULL!	3	2	2	2	2	2	2	2	2	2	2	2	2	2	1	#NULL!	1	2	#NULL!	3	2	2	2	2	2	2	2	2	2	2
1	1	2004-12-19	14	2	2	2	1	8	1	1	1	1	2	1	2	2	1	2	#NULL!	3	2	2	2	2	2	2	2	2	2	2	2	2	2	1	#NULL!	1	2	#NULL!	3	2	2	2	2	2	2	2	2	2	2
2	1	2003-09-04	16	2	2	2	0	3	1	1	2	1	2	2	2	2	1	1	43	3	2	2	2	2	2	2	2	2	2	2	2	2	2	1	#NULL!	1	1	42	3	2	2	2	2	2	2	2	2	2	2
1	1	2004-09-24	15	2	2	2	0	4	1	1	1	1	2	2	2	2	1	1	43	3	2	2	2	2	2	2	2	2	2	2	2	2	2	1	#NULL!	1	2	#NULL!	2	2	2	2	2	2	2	2	2	2	2
1	1	2004-08-20	15	2	2	2	0	3	1	1	2	1	2	2	2	2	1	2	#NULL!	2	2	2	2	2	2	2	2	2	2	2	2	2	2	1	#NULL!	1	2	#NULL!	2	2	2	2	2	2	2	2	2	2	2
2	1	2005-01-21	14	2	1	2	0	4	1	1	2	1	2	2	2	2	1	1	45	3	2	2	1	2	2	2	2	2	2	2	2	2	2	2	#NULL!	1	1	40	3	2	2	2	2	2	2	2	2	2	2
1	1	2005-10-20	14	2	2	2	0	3	1	1	2	1	2	2	2	2	1	2	#NULL!	0	2	2	2	2	2	2	2	2	2	2	2	2	2	1	#NULL!	1	2	#NULL!	0	2	2	2	2	2	2	2	2	2	2
2	1	2005-03-01	14	2	2	2	0	2	2	1	2	1	2	2	2	2	1	1	40	1	2	2	2	2	2	2	2	2	2	2	2	2	2	1	#NULL!	1	1	30	2	2	2	2	2	2	2	2	2	2	2
2	3	2004-09-14	15	2	1	2	1	3	1	2	2	1	2	2	2	2	1	1	41	5	2	2	2	2	2	2	2	2	2	2	2	2	2	1	#NULL!	1	1	39	3	2	2	2	2	2	2	2	2	2	2
2	1	2005-11-09	14	2	2	1	0	6	2	2	2	2	1	1	2	2	1	2	#NULL!	2	2	2	2	2	2	2	2	2	2	2	2	2	2	1	#NULL!	1	2	#NULL!	2	2	2	2	2	2	2	2	2	2	2
2	1	2005-08-22	14	2	2	2	0	5	2	2	1	2	2	2	2	2	1	1	34	3	2	2	1	2	2	2	2	2	2	2	2	2	2	2	#NULL!	1	1	32	2	2	2	2	2	2	2	2	2	2	2
1	1	2005-12-30	13	2	2	2	0	3	1	1	2	2	1	2	2	2	1	1	45	3	2	2	2	2	2	2	2	2	2	2	2	2	2	1	#NULL!	1	1	40	3	2	2	2	2	2	2	2	2	2	2
1	6	2005-11-04	14	2	1	2	0	3	1	1	2	1	2	2	2	2	1	1	38	2	2	2	2	2	2	2	2	2	2	2	2	2	2	1	#NULL!	1	1	34	3	2	2	2	2	2	2	2	2	2	2
1	1	2005-09-26	14	2	2	2	0	3	1	1	2	1	2	2	2	2	1	1	43	2	2	2	2	2	2	2	2	2	2	2	2	2	2	1	#NULL!	1	2	#NULL!	2	2	2	2	2	2	2	2	2	2	2
1	1	2004-03-26	15	2	2	2	0	4	1	1	2	2	2	2	2	2	1	1	46	3	2	2	2	2	2	2	2	2	2	2	2	2	2	1	#NULL!	1	1	41	3	2	2	2	2	2	2	2	2	2	2
1	1	2004-02-20	15	2	2	2	0	4	1	1	2	1	2	2	2	2	1	1	40	3	2	2	1	2	2	2	2	2	2	2	2	2	2	2	#NULL!	1	1	33	3	2	2	2	2	2	2	2	2	2	2
2	6	2004-11-26	15	2	2	2	2	3	1	1	2	1	2	2	2	2	1	2	#NULL!	2	2	2	2	2	2	2	2	2	2	2	2	2	2	1	#NULL!	1	2	#NULL!	3	2	2	2	2	2	2	2	2	2	2
2	1	2004-02-19	15	2	2	2	0	3	1	1	2	1	2	2	2	2	1	1	50	2	2	2	2	2	2	2	2	2	2	2	2	2	2	1	#NULL!	1	1	50	2	2	2	2	2	2	2	2	2	2	2
1	1	2005-07-13	14	2	2	2	0	4	1	1	2	1	2	2	2	2	1	1	44	3	2	2	2	2	2	2	2	2	2	2	2	2	1	2	#NULL!	1	1	37	3	2	2	2	2	2	2	2	2	2	2
2	1	2004-04-07	15	2	2	2	0	3	1	1	2	1	2	2	2	2	1	1	40	0	2	2	2	2	2	2	2	2	2	2	2	2	1	2	#NULL!	1	1	36	2	2	2	1	2	2	2	2	2	2	2
2	1	2005-02-04	14	2	2	2	0	4	1	1	1	1	2	2	2	2	1	1	49	3	2	2	2	2	2	2	2	2	2	2	2	2	2	1	#NULL!	1	1	50	3	2	2	2	2	2	2	2	2	2	2
1	1	2003-10-23	16	2	2	2	0	3	1	1	2	1	2	2	2	2	1	2	#NULL!	3	2	2	2	2	2	2	2	2	2	2	2	2	2	1	#NULL!	1	2	#NULL!	3	2	2	2	2	2	2	2	2	2	2
2	1	2004-03-26	15	2	2	2	0	3	1	1	2	1	2	2	2	2	1	1	50	2	2	2	2	2	2	2	2	2	2	2	2	2	2	1	#NULL!	1	1	44	3	2	2	2	2	2	2	2	2	2	2
2	1	2005-10-12	14	2	2	2	0	3	1	1	1	2	2	2	2	2	1	1	41	2	2	2	2	2	2	2	2	2	2	2	2	2	2	1	#NULL!	1	1	40	2	2	2	2	2	2	2	2	2	2	2
2	6	2006-03-13	13	2	2	2	0	4	1	1	2	1	2	2	2	2	1	2	#NULL!	2	2	2	2	2	2	2	2	2	2	2	2	2	2	1	#NULL!	1	2	#NULL!	2	2	2	2	2	2	2	2	2	2	2
2	1	2005-07-30	14	2	2	2	0	4	1	1	2	1	2	2	2	2	1	1	36	2	2	2	2	2	2	2	2	2	2	2	2	2	2	1	#NULL!	1	1	36	3	2	2	2	2	2	2	2	2	2	2
1	1	2005-07-30	14	2	2	2	0	5	1	1	2	1	1	2	2	1	1	1	42	2	2	2	2	2	2	2	2	2	2	2	2	2	2	1	#NULL!	1	1	39	2	2	2	2	2	2	2	2	2	2	2
1	1	2005-10-07	14	2	2	2	0	3	2	1	1	2	2	2	2	2	1	1	43	2	2	2	2	2	2	2	2	2	2	2	2	2	2	1	#NULL!	1	1	38	2	2	2	2	2	2	2	2	2	2	2
1	1	2005-12-11	13	2	1	2	0	6	1	1	2	1	1	2	1	2	1	1	36	2	2	2	2	2	2	2	2	2	2	2	2	2	2	1	#NULL!	1	1	34	3	2	2	2	2	2	2	2	2	2	2
2	6	2006-02-21	13	2	1	1	0	4	1	1	2	2	1	1	2	2	1	1	45	2	2	2	2	2	2	2	2	2	2	2	2	2	2	1	#NULL!	1	1	43	3	2	2	1	2	2	2	2	2	2	2
2	1	2005-12-21	13	2	2	2	0	4	1	1	1	1	2	2	2	2	1	1	38	3	2	2	2	2	2	2	2	2	2	2	2	2	2	1	#NULL!	1	1	35	3	2	2	2	2	2	2	2	2	2	2
2	1	2006-02-17	13	2	2	2	0	3	1	1	2	1	2	2	2	2	1	1	37	3	2	2	2	2	2	2	2	2	2	2	2	2	2	1	#NULL!	1	1	34	3	2	2	2	2	2	2	2	2	2	2
1	1	2005-12-25	13	2	2	2	1	3	1	1	2	1	2	2	2	2	1	1	55	3	2	2	2	2	2	2	2	2	2	2	2	2	2	1	#NULL!	1	1	54	2	2	2	1	2	2	2	2	2	2	2
2	1	2005-09-26	14	2	2	1	0	2	1	1	2	2	2	2	2	2	1	2	#NULL!	3	2	2	2	2	2	2	2	2	2	2	2	2	2	1	#NULL!	1	2	#NULL!	2	2	2	2	2	2	2	2	2	2	2
[truncated: 1,147 more rows]
[truncated: 98 more columns]
